# Supplementary material for: Coordinated Transcriptional Waves Define the Inflammatory Response of Primary Microglial Culture
Source: Int J Mol Sci. 2023 Jun 30;24(13):10928. doi: 10.3390/ijms241310928 (PMC10341870; doi:10.3390/ijms241310928)
Supplement: Supplementary file 1 [file ijms-24-10928-s001.zip › Table S1-S6.xlsx]

## Sheet: Table S1
Table S1. Results of RNA-seq for cells exposed with bzATP
Combined trend	The trend is define by the predetermne diffeential gene expression thresholds. There are three label called Up, Same and Down. The threshold are define according to Methods (see Table 1 for definition).
FC	Fold change (FC) is based on the ratio of the mean (by TMM) of two experimental grops. The log base is 2. For example, down-down indicates that there is a substantial downregulation in gene expression at 3hrs relative to NT cells and at 8hrs relative to 3 hrs. All together there are 9 combined trends .
Mean values	The mean values are alculated from three independent expeiments for each group (e.g. NTI, NTII, NTIII).
NT	Non treated culture (naïve cells)
ensemblID	A unique identifier of the transcript (usually the major version of the transript)
Trend	gene_name	ensemblID	logFC (0 to 3 hours of ATP)	FDR (0 to 3 hours of ATP)	logFC (3 to 8 hours of ATP)	FDR (3 to 8 hours of ATP)	NTI	NTII	NTIII	ATP_3hI	ATP_3hII	ATP_3hIII	ATP_8hI	ATP_8hII	ATP_8hIII	Av NT	Ave ATP 3h	Ave ATP 8hrs	Total
down_same	Fnip2	ENSMUSG00000061175	-1.25842	1.62e-26	-1.31989	2.86e-27	345.519	342.583	347.623	147.923	141.955	142.998	137.248	142.111	135.59	279.376	144.292	138.316	561.984
up_same	Ptgs2	ENSMUSG00000032487	1.97512	2.44e-22	2.21034	2.57e-24	143.61	147.005	129.809	550.06	609.016	494.749	596.689	693.357	656.439	275.625	551.275	648.828	1475.73
down_same	Lhfpl2	ENSMUSG00000045312	-0.997375	3.23e-22	-1.26868	2.29e-25	365.718	372.781	368.815	190.063	179.495	184.969	153.964	151.746	153.815	310.553	184.843	153.175	648.571
down_same	Tbc1d2	ENSMUSG00000039813	-0.805902	5.44e-20	-1.08759	2.84e-24	166.309	168.679	162.781	95.9129	94.254	94.6201	78.6442	77.5999	78.0277	142.457	94.929	78.0906	315.477
down_same	Plekhm1	ENSMUSG00000034247	-0.828383	1.09e-19	-1.02667	5.99e-23	183.363	185.726	181.946	104.333	98.1653	107.543	92.7143	88.2022	89.5339	157.335	103.347	90.1501	350.832
down_same	Rnf144b	ENSMUSG00000038068	-1.27477	2.22e-18	-1.32427	4.49e-20	54.388	56.0691	53.0051	23.4593	20.0242	23.8943	23.1382	20.5828	21.5397	44.1779	22.4593	21.7536	88.3907
up_up	Cxcl2	ENSMUSG00000058427	0.90347	2.66e-18	1.42205	2.57e-24	65.9591	60.6523	57.8808	109.934	122.271	113.286	158.515	167.943	168.359	76.1556	115.164	164.939	356.258
up_same	Klf7	ENSMUSG00000025959	0.978077	2.66e-18	1.12943	6.19e-21	64.7496	68.705	60.6324	127.714	133.92	121.46	138.539	143.907	142.739	85.6839	127.698	141.728	355.11
up_down	Hivep3	ENSMUSG00000028634	1.28959	3.06e-18	0.0931726	0.178619	62.5321	60.4382	58.5084	141.657	159.853	142.924	61.4438	69.795	62.7167	86.8677	148.145	64.6518	299.664
up_same	Tnf	ENSMUSG00000024401	0.880922	3.14e-18	1.09945	2.49e-21	203.078	192.194	180.063	344.292	340.326	375.13	403.709	415.904	413.58	238.85	353.249	411.064	1003.16
down_down	Gm32914	ENSMUSG00000108161	-1.17155	3.14e-18	-2.47208	1.18e-25	58.2585	60.8665	62.2738	27.4932	25.0834	27.7233	11.4562	10.6368	10.5551	50.2112	26.7666	10.8827	87.8604
down_down	Sema4d	ENSMUSG00000021451	-0.722062	3.59e-18	-1.32371	2.95e-25	195.902	193.394	196.476	119.411	117.934	117.741	76.2238	81.2261	76.6776	169.76	118.362	78.0425	366.165
up_same	Phlda1	ENSMUSG00000020205	1.58149	3.59e-18	1.36772	3.17e-17	18.6669	18.8468	21.0476	57.2579	59.6049	57.9502	46.8896	50.939	52.806	32.3841	58.271	50.2115	140.867
down_same	Tlr2	ENSMUSG00000027995	-0.76444	3.6e-17	-0.846524	3.15e-19	163.124	171.634	175.139	100.338	95.3168	104.082	92.2302	94.2458	96.8672	149.037	99.9124	94.4477	343.397
up_same	Ubash3b	ENSMUSG00000032020	0.86215	3.82e-17	0.68783	1.84e-15	67.7331	70.3756	69.9494	126.5	130.051	121.717	110.27	111.962	112.761	88.9417	126.089	111.664	326.695
down_same	Plxna2	ENSMUSG00000026640	-0.540242	6.57e-17	-0.770597	1.56e-21	282.423	290.797	284.239	199.149	194.587	195.867	161.968	171.846	168.85	258.062	196.535	167.555	622.151
up_same	Srxn1	ENSMUSG00000032802	0.697963	8.54e-17	0.251619	2.38e-07	115.912	113.338	109.486	175.886	191.441	182.687	131.536	140.281	131.846	132.903	183.338	134.554	450.796
down_same	Lpin1	ENSMUSG00000020593	-0.625158	1.17e-16	-0.215244	1.98e-07	95.1488	92.2207	95.1485	63.6808	58.3295	61.006	82.5812	79.154	81.5256	83.6833	61.0054	81.0869	225.776
up_same	Cdkn1a	ENSMUSG00000023067	0.643958	1.2e-16	0.917357	2.72e-21	256.216	260.342	241.806	390.936	390.195	404.105	473.478	477.894	481.237	297.695	395.079	477.537	1170.31
up_down	Phldb1	ENSMUSG00000048537	0.920015	1.35e-16	0.364536	9e-08	46.123	46.3031	48.8052	89.4508	94.339	83.5013	58.9912	62.301	60.3848	61.5197	89.097	60.559	211.176
up_down	Hmox1	ENSMUSG00000005413	0.701799	3.16e-16	-0.0805672	0.060389	620.967	586.306	588.753	951.844	981.185	988.43	536.149	598.628	563.867	708.968	973.82	566.215	2249
up_same	Arhgap31	ENSMUSG00000022799	0.544374	3.86e-16	0.347622	4.12e-12	129.902	129.657	128.12	188.497	193.907	183.239	163.194	165.491	164.708	148.758	188.548	164.464	501.77
up_up	Il1a	ENSMUSG00000027399	1.0141	4.24e-16	1.98503	1.06e-24	17.3364	16.6623	18.4408	33.9161	39.1131	32.9145	64.8645	74.2846	68.301	23.0064	35.3146	69.15	127.471
up_same	Irf5	ENSMUSG00000029771	0.553022	6.92e-16	0.421932	8.39e-14	70.9988	69.3476	68.8391	102.532	102.842	101.726	93.2306	94.3839	92.817	80.2394	102.366	93.4772	276.083
up_up	Il1b	ENSMUSG00000027398	2.06067	7.37e-16	3.42699	9.74e-24	3.10443	3.08402	2.94473	11.6317	15.0075	11.7079	29.2374	36.3653	32.9846	5.88683	12.7824	32.8624	51.5316
up_same	Zyx	ENSMUSG00000029860	0.886059	8.17e-16	0.537605	3.06e-11	110.066	116.807	113.493	207.296	222.349	199.586	160.064	167.978	165.966	145.865	209.744	164.669	520.278
up_same	Dusp6	ENSMUSG00000019960	1.04077	8.42e-16	1.20559	2.31e-18	66.2413	71.1894	67.6805	141.265	145.866	135.082	156.03	159.586	157.436	93.3783	140.738	157.684	391.8
down_down	Ralgds	ENSMUSG00000026821	-0.652026	8.42e-16	-1.1885	7.06e-23	83.6181	85.9241	87.0867	52.5582	52.8026	57.6556	38.4669	36.8833	37.1575	75.1897	54.3388	37.5026	167.031
down_same	Plpp3	ENSMUSG00000028517	-1.01171	8.42e-16	-1.33786	1.59e-19	57.2909	66.3492	64.0116	31.9187	30.2276	30.7423	23.8805	25.2105	25.0376	54.0932	30.9629	24.7095	109.766
up_same	Txnrd1	ENSMUSG00000020250	0.515799	1.14e-15	0.183616	1.73e-06	421.558	408.247	404.2	591.339	593.881	579.318	456.988	480.691	463.962	467.929	588.179	467.214	1523.32
up_same	Il1rl1	ENSMUSG00000026069	0.994121	1.42e-15	0.983043	3.79e-16	126.193	132.87	127.637	256.721	280.126	233.752	241.515	268.267	254.671	172.409	256.866	254.818	684.093
up_same	Dok2	ENSMUSG00000022102	0.820378	2.25e-15	1.14268	4.72e-20	72.9743	76.2009	75.5974	133.863	134.387	128.639	158.999	170.188	166.948	95.2204	132.296	165.378	392.895
up_same	Dnajb4	ENSMUSG00000028035	0.761389	2.54e-15	0.520127	6.01e-12	25.5208	25.5716	24.6681	40.8482	46.0854	41.8243	35.7561	36.7451	36.2677	30.3626	42.9193	36.2563	109.538
down_same	Ccbe1	ENSMUSG00000046318	-0.994032	2.54e-15	-0.951589	5.48e-16	40.4786	42.5337	40.0193	20.4437	20.4918	20.8385	22.2992	21.8951	19.5453	34.3322	20.5913	21.2465	76.1701
up_same	C5ar1	ENSMUSG00000049130	0.903243	3.56e-15	1.033	1.31e-17	39.9544	41.3344	42.0951	76.37	81.4997	72.9716	80.5804	83.0219	88.5213	53.2665	76.9471	84.0412	214.255
up_same	Plaur	ENSMUSG00000046223	1.1429	3.66e-15	1.22185	1.57e-16	157.399	153.644	148.878	346.798	349.552	319.683	341.103	370.767	361.204	216.44	338.678	357.691	912.809
up_down	Klf2	ENSMUSG00000055148	1.88449	3.66e-15	0.529191	0.000638382	4.71712	5.95387	6.32392	19.2296	24.8708	18.5558	8.48724	8.39198	7.51741	10.5025	20.8854	8.13221	39.5201
up_same	Fosl2	ENSMUSG00000029135	0.689557	4.08e-15	0.702583	4.35e-16	80.5943	83.654	78.2043	131.748	131.794	127.792	127.341	134.099	133.38	97.8688	130.445	131.607	359.92
same_same	Wdr91	ENSMUSG00000058486	-0.455075	4.08e-15	-0.570387	2.17e-18	125.266	128.072	128.023	92.8581	90.8528	94.2887	86.7119	85.3703	84.6859	116.318	92.6665	85.5894	294.574
up_same	Sgk1	ENSMUSG00000019970	1.22378	4.19e-15	1.51245	9.85e-19	10.2406	9.55189	8.97901	22.5194	23.9355	21.133	27.1721	27.7661	27.4616	13.6834	22.5293	27.4666	63.6793
up_same	Srgn	ENSMUSG00000020077	0.514751	5.17e-15	0.813988	9.45e-21	187.234	184.613	179.532	261.812	262.695	263.427	317.223	327.287	325.059	208.652	262.645	323.19	794.487
up_down	Pdgfb	ENSMUSG00000000489	1.31963	6.13e-15	0.525933	1.41e-06	63.0966	65.8352	64.5426	161.591	168.059	153.454	86.0665	100.117	92.5102	97.323	161.035	92.8978	351.255
up_same	Vsir	ENSMUSG00000020101	0.783751	6.13e-15	0.48134	1.81e-10	69.7086	73.5881	69.4183	121.448	128.605	116.637	97.1676	100.566	99.3526	88.1514	122.23	99.0286	309.41
down_same	Abca1	ENSMUSG00000015243	-0.780266	6.13e-15	-0.924985	1.56e-17	100.914	109.525	106.927	62.0751	63.0485	59.6806	59.5075	54.2889	53.2662	92.8427	61.6014	55.6875	210.132
up_same	Ppp1r18	ENSMUSG00000034595	0.561557	6.8e-15	0.525783	7.57e-15	155.302	150.517	143.423	223.549	223.412	216.632	211.245	215.187	220.766	172.496	221.198	215.733	609.427
up_same	Sgms1	ENSMUSG00000040451	0.598527	6.8e-15	0.364602	2.22e-10	80.6346	84.7248	79.1697	125.873	129.371	115.569	100.653	108.716	105.704	96.5893	123.604	105.024	325.218
up_same	Arc	ENSMUSG00000022602	1.12366	8.67e-15	1.05446	6.98e-15	17.1349	17.4761	17.2822	36.1876	41.6214	35.5654	35.8207	35.571	36.3597	23.6486	37.7915	35.9171	97.3572
up_same	Ptpn22	ENSMUSG00000027843	0.565107	9.94e-15	0.593612	5.36e-16	95.9148	101.216	96.8381	143.771	150.968	140.421	141.927	154.026	147.771	113.942	145.053	147.908	406.903
up_same	Dusp5	ENSMUSG00000034765	1.24812	1.29e-14	0.878626	2.33e-11	14.3126	13.6639	13.8064	30.7047	36.1796	32.6568	24.5259	24.9687	27.3081	19.3917	33.1803	25.6009	78.1729
down_down	Ttyh2	ENSMUSG00000034714	-0.531142	1.45e-14	-1.07076	1.14e-22	114.3	112.995	110.596	80.9914	74.7825	78.0155	52.9565	52.4931	55.3834	101.528	77.9298	53.611	233.068
down_same	St3gal1	ENSMUSG00000013846	-0.552353	1.46e-14	-0.770875	7.74e-19	172.8	167.779	164.132	109.542	111.812	122.712	100.459	96.6632	98.7389	147.151	114.689	98.6205	360.46
up_same	Gfod1	ENSMUSG00000051335	0.968351	1.47e-14	0.781545	6.95e-13	102.366	100.659	96.7416	194.411	207.937	184.933	166.518	166.873	182.075	130.604	195.76	171.822	498.185
up_same	Rassf8	ENSMUSG00000030259	0.881221	1.47e-14	0.511087	1.57e-09	61.7661	64.2075	63.191	112.44	126.267	110.12	83.1944	95.7998	90.6692	79.9462	116.276	89.8878	286.11
down_same	Ahnak2	ENSMUSG00000072812	-0.822405	1.47e-14	-1.14056	1.04e-18	57.6537	54.2273	55.9498	32.5845	32.2683	30.1901	26.5267	26.7991	22.9818	47.5872	31.681	25.4359	104.704
down_same	Mreg	ENSMUSG00000039395	-0.942041	1.47e-14	-1.30098	1.33e-18	41.4462	39.9637	40.7435	22.3235	21.2146	20.1022	16.5227	16.8185	16.2622	34.3436	21.2134	16.5344	72.0914
down_same	Pik3r5	ENSMUSG00000020901	-0.559523	1.74e-14	-0.939419	1.08e-20	393.86	401.95	384.601	268.509	251.939	280.326	204.468	202.651	208.401	351.687	266.925	205.173	823.785
down_same	Abcg1	ENSMUSG00000024030	-0.808043	2.18e-14	-0.509507	9.05e-11	84.0212	84.9818	83.2248	51.3441	46.8931	45.8742	61.5406	56.1538	59.4029	73.1836	48.0372	59.0324	180.253
up_same	Arap3	ENSMUSG00000024451	0.518389	2.2e-14	0.745153	3.19e-19	89.9479	91.4497	85.9764	130.73	127.968	124.626	147.768	151.643	149.121	102.719	127.775	149.511	380.004
up_same	Cyth4	ENSMUSG00000018008	0.528626	2.38e-14	0.274034	2.03e-08	334.19	340.998	323.293	470.243	497.246	473.174	395.48	411.863	400.202	378.178	480.221	402.515	1260.91
down_same	Fnip1	ENSMUSG00000035992	-0.568622	2.38e-14	-0.521943	2.96e-14	127.08	130.857	133.044	87.4535	91.6181	84.6426	92.0688	89.3073	90.7305	117.118	87.9047	90.7022	295.725
up_same	Flnc	ENSMUSG00000068699	0.548443	3.92e-14	0.505156	7.18e-14	280.931	279.618	270.336	420.192	393.894	401.233	382.571	405.06	391.887	323.382	405.106	393.173	1121.66
same_same	Lpl	ENSMUSG00000015568	0.411833	4.11e-14	0.705736	1.48e-20	1382.84	1412.35	1394.45	1832.53	1874.79	1866.48	2200.71	2348.34	2284.19	1546.44	1857.93	2277.75	5682.12
up_same	Mitf	ENSMUSG00000035158	0.528988	4.11e-14	0.150242	0.000355506	206.828	215.239	214.82	303.953	324.213	290.929	227.8	240.087	238.808	244.671	306.365	235.565	786.601
up_same	Hspa4l	ENSMUSG00000025757	0.710646	4.11e-14	0.320137	5.27e-07	57.3715	62.28	60.9704	97.3228	104.457	93.9205	76.2561	72.4888	76.4321	73.5244	98.5669	75.059	247.15
down_same	Kcnj2	ENSMUSG00000041695	-0.532091	4.18e-14	-0.424351	2.19e-12	322.538	327.034	319.575	225.154	221.286	223.775	243.903	238.36	239.943	290.588	223.405	240.736	754.729
same_down	Mfsd12	ENSMUSG00000034854	-0.480706	4.74e-14	-1.07392	2.88e-23	285.688	289.598	279.025	206.747	199.009	206.434	136.086	138.001	131.908	258.457	204.063	135.332	597.852
up_same	Trim16	ENSMUSG00000047821	1.02931	4.74e-14	0.706529	1.32e-10	16.2479	17.2619	14.6754	31.7621	34.7766	32.2518	25.9781	26.3847	26.5104	21.2331	32.9302	26.291	80.4543
up_same	Cdc42ep2	ENSMUSG00000045664	0.905401	5e-14	0.67991	1.38e-11	20.7231	23.9868	24.2337	42.5322	44.0022	42.2661	35.1753	37.9539	37.0041	30.2509	42.9335	36.7111	109.895
up_down	Kdm6b	ENSMUSG00000018476	1.18338	5.23e-14	0.617881	6.75e-08	25.4402	26.3426	21.0476	55.4564	59.2223	51.8385	37.1438	37.6776	37.495	34.2822	55.5057	37.4388	127.227
up_same	Vegfa	ENSMUSG00000023951	0.733332	5.88e-14	0.238561	0.000105176	65.2334	63.6507	65.7495	108.406	112.535	102.867	74.933	79.0504	75.6957	79.2688	107.936	76.5597	263.765
up_same	Efr3b	ENSMUSG00000020658	0.78912	6.56e-14	0.449972	8.25e-09	63.8223	62.9225	61.3565	109.229	111.302	104.966	81.484	92.1737	83.7348	77.8359	108.499	85.7975	272.132
up_same	Abhd5	ENSMUSG00000032540	0.593651	6.68e-14	0.599267	1.09e-14	96.3987	94.191	93.2658	144.32	147.822	136.702	142.089	142.56	145.531	110.592	142.948	143.393	396.933
up_same	Jag1	ENSMUSG00000027276	0.643244	6.68e-14	0.215536	7.88e-05	29.8751	29.341	30.461	46.292	47.2333	46.5001	34.3685	35.7436	34.0278	35.3647	46.6751	34.7133	116.753
same_down	Fam102a	ENSMUSG00000039157	-0.408254	6.84e-14	-1.02807	2.35e-24	266.255	274.221	270.336	197.7	200.88	212.177	130.568	133.719	133.288	247.419	203.586	132.525	583.53
up_same	Serpine1	ENSMUSG00000037411	1.33533	7.07e-14	1.52736	2.54e-16	16.8929	15.2059	15.9788	38.4983	45.4052	37.9217	44.6629	44.999	48.9706	23.2277	40.6084	46.2108	110.047
up_same	Nlrp3	ENSMUSG00000032691	0.553007	7.21e-14	0.620639	1.18e-15	157.802	148.804	146.85	220.533	229.492	215.564	224.315	239.465	233.684	172.062	221.863	232.488	626.413
down_same	Aoah	ENSMUSG00000021322	-0.628517	7.21e-14	-0.457168	1.51e-11	68.2169	72.5172	70.9148	45.0779	44.3423	47.2732	50.6008	51.5606	51.9162	62.8367	45.5645	51.3592	159.76
same_same	Apobec1	ENSMUSG00000040613	-0.414388	7.39e-14	-0.481977	4.17e-16	189.451	200.504	200	144.476	149.395	148.631	141.024	138.312	142.8	181.66	147.501	140.712	469.873
up_same	Myo1e	ENSMUSG00000032220	0.512877	8.49e-14	0.359392	1.15e-10	328.707	320.224	305.093	458.964	466.636	436.099	396.061	415.144	412.967	361.427	453.9	408.057	1223.38
up_down	Ccl2	ENSMUSG00000035385	2.19131	9.29e-14	1.50651	7.13e-10	6.2895	4.41186	5.74463	24.5951	25.8486	24.8516	15.1996	17.3711	14.3598	11.5839	25.0984	15.6435	52.3257
down_same	Zeb2	ENSMUSG00000026872	-0.527903	1.08e-13	-0.517867	4.54e-14	359.429	370.982	364.422	259.031	253.81	246.528	256.069	253.555	254.978	331.478	253.123	254.868	839.469
same_same	Bhlhe41	ENSMUSG00000030256	-0.496751	1.17e-13	-0.60927	2.13e-16	330.682	329.519	340.526	243.483	227.366	238.096	220.959	207.313	227.425	304.509	236.315	218.566	759.39
down_same	Rere	ENSMUSG00000039852	-0.542527	1.55e-13	-0.684912	1.14e-16	123.935	131.542	121.12	88.1976	82.435	87.8457	77.3533	77.4963	79.4698	113.62	86.1594	78.1065	277.886
up_down	Traf5	ENSMUSG00000026637	1.17788	1.59e-13	0.266436	0.0104138	8.46663	8.00988	8.15835	19.3471	19.8116	16.7886	10.2944	9.39349	9.94139	11.8384	18.6491	9.87643	40.364
same_same	Vcl	ENSMUSG00000021823	0.464778	1.99e-13	0.183669	1.12e-05	144.497	143.964	145.643	198.954	204.833	195.425	159.192	167.563	166.273	162.854	199.737	164.343	526.934
same_same	Rab3il1	ENSMUSG00000024663	-0.426462	2.18e-13	-0.784137	1.58e-20	181.71	184.484	186.097	138.876	133.027	138.801	109.431	105.331	105.857	169.819	136.901	106.873	413.593
up_same	Hs3st3b1	ENSMUSG00000070407	0.807277	2.36e-13	0.529957	1.28e-09	37.3338	37.2224	38.3297	70.1429	64.8766	62.4787	55.1187	53.0111	54.7083	48.565	65.8328	54.2794	168.677
down_down	Nceh1	ENSMUSG00000027698	-0.543063	2.64e-13	-1.09192	2.88e-21	216.222	206.672	214.965	142.087	148.672	147.048	102.331	98.39	98.4934	187.908	145.936	99.7381	433.582
up_same	Actg1	ENSMUSG00000062825	0.542816	2.72e-13	0.464064	3.11e-12	115.993	114.066	115.955	165.116	174.733	164.389	150.866	163.799	162.652	131.712	168.079	159.106	458.897
down_same	Flcn	ENSMUSG00000032633	-0.748846	3.03e-13	-0.565292	1.9e-11	33.4634	35.2949	33.8402	21.8144	18.2811	20.8017	22.4283	22.9657	23.9023	30.3165	20.2991	23.0988	73.7143
up_same	Cd44	ENSMUSG00000005087	0.556682	3.51e-13	0.301219	7.79e-08	1081.27	1125.84	1073.23	1573.97	1682.41	1568.78	1303.13	1387.03	1351.91	1257.68	1608.39	1347.35	4213.42
up_up	Ier3	ENSMUSG00000003541	0.79911	3.55e-13	1.32357	2.31e-19	65.8381	57.8682	58.4118	104.255	105.223	107.69	146.962	149.812	159.43	73.5116	105.723	152.068	331.302
up_same	Zfp318	ENSMUSG00000015597	0.603986	3.67e-13	0.381816	3.64e-09	70.6762	70.2899	71.3976	108.367	110.112	104.413	89.0354	95.3163	92.3874	83.3515	107.631	92.2464	283.229
down_same	Lyst	ENSMUSG00000019726	-0.509103	3.82e-13	-0.610563	1.29e-15	377.854	373.252	379.049	273.992	261.547	258.567	250.551	249.549	240.128	342.098	264.702	246.743	853.542
up_same	Junb	ENSMUSG00000052837	0.601961	3.82e-13	0.473315	3.22e-11	141.111	143.45	147.188	216.46	230.129	208.753	195.271	202.72	201.252	169.033	218.448	199.748	587.228
same_same	1700017B05Rik	ENSMUSG00000032300	-0.471374	3.82e-13	-0.548051	2.04e-15	113.09	118.949	118.417	84.3203	82.6051	85.5999	77.7728	82.5039	79.3777	107.229	84.1751	79.8848	271.289
same_same	Ptpn12	ENSMUSG00000028771	0.450437	4.39e-13	0.384689	5.12e-12	138.409	140.965	142.071	193.823	200.922	181.324	186.3	180.03	183.732	158.953	192.023	183.354	534.33
up_same	Map3k11	ENSMUSG00000004054	0.506139	4.79e-13	0.132991	0.00248275	66.4429	69.2619	71.0597	98.8502	101.099	93.626	72.8031	75.9077	77.7208	79.7239	97.8583	75.4772	253.059
up_down	Emp1	ENSMUSG00000030208	0.748835	5.13e-13	-0.000700339	0.993431	355.518	359.759	338.064	542.815	634.822	592.903	342.781	362.824	347.458	413.546	590.18	351.021	1354.75
up_down	Arhgap23	ENSMUSG00000049807	1.06143	5.13e-13	0.323511	0.00105299	11.0469	11.2224	10.6686	23.616	24.2756	21.0962	13.3601	14.9536	13.0404	15.169	22.9959	13.7847	51.9496
down_same	Slc31a2	ENSMUSG00000066152	-0.575478	5.36e-13	-0.205949	3.36e-05	69.7892	71.6177	61.7427	45.8612	45.1076	45.6533	59.5075	57.6388	59.3415	59.7405	45.5407	58.8293	164.11
same_same	Slc2a1	ENSMUSG00000028645	0.460869	6.81e-13	0.35052	1.25e-10	285.769	288.998	280.859	398.064	396.317	383.414	348.945	368.522	373.539	322.641	392.598	363.669	1078.91
up_down	Dot1l	ENSMUSG00000061589	0.632716	7.5e-13	0.0485507	0.388884	172.961	172.576	168.67	261.225	274.812	261.586	172.585	186.454	173.054	200.824	265.874	177.364	644.062
same_same	Plxna1	ENSMUSG00000030084	-0.397181	8.7e-13	-0.575792	2.96e-17	2103.76	2120.48	2119.58	1658.8	1549.51	1608.73	1420.05	1442.14	1394	1966.28	1605.68	1418.73	4990.69
up_same	Zswim6	ENSMUSG00000032846	0.741289	1.06e-12	0.703613	6.76e-13	27.577	27.3707	23.1234	43.198	46.1279	41.9715	42.1458	43.0305	42.5577	31.2307	43.7658	42.578	117.574
down_down	Hyal1	ENSMUSG00000010051	-0.872134	1.06e-12	-1.68702	1.23e-19	18.546	18.2043	18.1994	9.20357	10.1184	10.677	6.16374	5.94	5.00138	15.2024	9.99964	5.70171	30.9038
up_same	Frmd6	ENSMUSG00000048285	0.822121	1.29e-12	1.03019	3.98e-16	15.1996	16.1483	14.965	26.8274	28.8671	26.3979	29.9797	31.4268	33.1993	19.3136	27.3641	31.5353	78.213
same_same	Rasa3	ENSMUSG00000031453	-0.440112	1.33e-12	-0.509758	7.63e-15	110.631	116.593	107.652	82.1663	83.7955	81.1082	77.6438	80.2937	77.4754	102.137	82.3566	78.4709	262.965
up_down	Nr4a3	ENSMUSG00000028341	2.88334	1.44e-12	-0.295859	0.571274	0.282221	0.299835	0.386194	2.34985	2.55085	2.28266	0.290438	0.241744	0.245466	1.01196	2.39445	0.259216	3.66563
same_same	Myadm	ENSMUSG00000068566	0.419887	1.51e-12	0.649302	9.35e-18	450.909	455.706	448.806	590.164	617.093	606.121	691.791	716.358	717.744	498.225	604.459	708.631	1811.32
same_same	Zbtb7a	ENSMUSG00000035011	0.351404	1.52e-12	0.172356	1.36e-06	186.79	190.481	189.09	239.567	246.157	236.918	209.438	212.873	215.857	206.379	240.881	212.723	659.983
up_down	Malt1	ENSMUSG00000032688	0.774487	1.52e-12	-0.0906668	0.191185	148.851	152.916	148.492	263.261	272.346	234.893	141.024	144.08	137.799	188.223	256.833	140.967	586.024
up_same	Sertad2	ENSMUSG00000049800	0.536844	1.67e-12	0.364621	2.94e-09	108.574	106.698	103.307	159.437	156.41	146.827	131.568	137.276	141.542	123.147	154.225	136.796	414.168
same_same	Rnf213	ENSMUSG00000070327	-0.381789	1.96e-12	-0.377271	6.81e-13	298.55	304.761	301.279	238.118	222.732	233.237	233.964	237.876	224.694	281.386	231.362	232.178	744.926
up_same	Nfkbid	ENSMUSG00000036931	0.575738	1.97e-12	0.562865	5.84e-13	30.2783	31.3113	29.6404	46.057	45.0225	44.9905	43.5012	47.7618	43.7544	35.6696	45.3567	45.0058	126.032
up_same	Cass4	ENSMUSG00000074570	1.1819	2.24e-12	0.758866	2.09e-08	14.1917	12.6787	12.9858	31.018	33.5862	26.3611	23.235	21.8261	22.4909	18.8942	30.3218	22.5173	71.7332
up_down	Pdgfa	ENSMUSG00000025856	1.09681	2.34e-12	0.197683	0.0629646	20.0377	20.0889	18.7787	42.0231	44.1722	40.2043	22.9769	22.7585	21.9692	26.9636	42.1332	22.5682	91.665
up_same	Tafa2	ENSMUSG00000044071	0.615	2.37e-12	0.185512	0.00141673	31.2862	30.0692	30.8472	46.7619	48.4237	46.1687	34.4653	36.8487	33.6903	35.8928	47.1181	35.0014	118.012
down_same	Lpxn	ENSMUSG00000024696	-0.527151	2.72e-12	-0.912178	1.24e-18	74.4257	74.4019	76.0319	48.916	50.6769	56.1461	39.0478	40.8548	39.5815	66.4499	51.913	39.828	158.191
up_down	Myc	ENSMUSG00000022346	1.37214	3.43e-12	0.844868	1.02e-07	5.40252	5.05436	3.86194	11.2401	13.7321	12.5546	7.77728	9.73884	8.52996	6.7188	12.5089	8.68203	27.9098
same_same	Fbxo42	ENSMUSG00000028920	-0.43288	3.63e-12	-0.613654	1.8e-16	88.6577	93.5914	90.5625	69.438	63.8988	68.5167	60.4756	60.4016	57.4698	84.5306	67.2845	59.449	211.264
same_same	Actb	ENSMUSG00000029580	0.334719	3.75e-12	0.344237	6.05e-13	3252.44	3333.31	3278.5	4224.79	4202.7	4012.66	4009.4	4283.71	4229.36	3612.2	4146.72	4174.16	11933.1
same_same	Ctsl	ENSMUSG00000021477	0.409934	3.77e-12	0.507201	6.4e-15	340.439	314.356	316.148	429.513	442.02	418.832	462.506	462.975	454.788	353.339	430.122	460.09	1243.55
same_same	Prdx1	ENSMUSG00000028691	0.383446	3.86e-12	0.547527	2.06e-16	1890.44	1751.08	1751.97	2332.22	2320.68	2382.77	2614.52	2668.13	2600.53	1945.09	2345.22	2627.73	6918.04
same_same	Cdt1	ENSMUSG00000006585	-0.436221	4.15e-12	-0.669794	3.12e-17	104.18	106.87	108.569	80.0123	76.1004	79.8196	65.8649	65.271	69.5284	98.4836	78.6441	66.8881	244.016
up_same	Odc1	ENSMUSG00000011179	0.513853	4.16e-12	0.582545	5.35e-14	121.839	109.74	110.21	164.333	160.789	163.137	162.581	174.47	175.048	128.094	162.753	170.7	461.547
same_same	Stk10	ENSMUSG00000020272	0.415959	5.02e-12	0.492253	1.84e-14	113.654	114.408	110.114	150.821	150.798	149.772	152.577	161.934	161.394	125.114	150.464	158.635	434.213
up_same	H60b	ENSMUSG00000075297	0.546375	5.7e-12	0.700385	1.46e-15	28.2624	30.0692	30.1231	42.4931	43.9172	42.6711	47.2446	48.0726	48.2342	34.2284	43.0271	47.8504	125.106
up_same	Synpo	ENSMUSG00000043079	0.598979	5.87e-12	0.867932	6.07e-17	35.3986	37.7364	37.7022	58.3937	54.0355	55.1889	65.5422	67.1359	69.3136	44.6107	55.8727	67.3305	167.814
same_same	Pik3ap1	ENSMUSG00000025017	0.362547	6.26e-12	0.0417484	0.223667	250.411	248.52	242.095	317.817	318.686	316.407	249.422	261.74	251.818	269.477	317.637	254.327	841.441
same_same	Gas6	ENSMUSG00000031451	-0.377011	6.87e-12	-0.858621	3.37e-21	209.247	211.555	208.4	160.142	158.323	165.898	117.789	113.585	115.584	193.366	161.454	115.653	470.473
up_same	Adora2b	ENSMUSG00000018500	1.18655	7.29e-12	1.29898	7.56e-14	4.27363	4.32619	3.66884	10.3393	9.52318	8.28386	9.77808	10.6022	10.0028	6.11145	9.38212	10.1277	25.6213
down_same	Neurl1b	ENSMUSG00000034413	-0.558571	8.2e-12	-0.724496	3.6e-15	88.5368	91.7923	86.2178	62.9759	57.9893	60.0119	56.8613	52.7348	51.8241	80.3287	60.3257	53.8067	194.461
same_same	Pxn	ENSMUSG00000029528	0.379191	8.4e-12	0.240388	4.71e-08	199.087	204.487	197.297	262.791	265.246	253.67	233.125	242.884	233.96	221.525	260.569	236.656	718.751
same_down	Gpr137b	ENSMUSG00000021306	-0.487359	8.47e-12	-1.16904	2.49e-21	93.4555	97.1465	89.7418	67.3231	68.1077	64.835	43.0816	41.2347	40.4713	84.7371	66.7553	41.5959	193.088
same_same	Ptpn7	ENSMUSG00000031506	0.372864	8.69e-12	0.313433	1.42e-10	282.261	274.349	267.005	358.077	354.866	353.813	333.778	343.035	346.875	299.81	355.585	341.229	996.625
down_same	Zfyve26	ENSMUSG00000066440	-0.580139	1e-11	-0.492863	5.66e-11	66.5639	67.5057	65.9909	46.7228	40.516	46.316	47.7932	48.6252	45.8715	60.0731	44.5183	47.43	152.021
same_same	Ank	ENSMUSG00000022265	0.380469	1.05e-11	0.364155	6.45e-12	97.8098	98.6457	102.631	128.497	131.156	129.449	124.082	129.333	131.233	109.925	129.701	128.216	367.841
up_same	Ptpre	ENSMUSG00000041836	0.574685	1.06e-11	0.481076	1.46e-10	43.0589	39.9209	38.909	61.8401	62.1983	58.0238	54.6992	58.5021	57.3164	46.89	60.6874	56.8392	164.417
same_same	Kif1b	ENSMUSG00000063077	0.379095	1.29e-11	0.457787	2.73e-14	105.027	107.084	106.3	140.912	141.997	131.4	147.155	148.915	141.327	118.099	138.103	145.799	402.001
same_same	Megf9	ENSMUSG00000039270	0.474825	1.29e-11	0.145703	0.00208343	46.2036	46.0889	46.7777	62.8192	68.4904	62.1842	53.7956	50.9045	49.1547	51.8953	64.4979	51.2849	167.678
same_same	Kcnn4	ENSMUSG00000054342	0.411437	1.31e-11	0.255749	9.85e-08	165.825	166.451	165.001	220.768	222.052	218.657	191.366	202.098	200.331	184.074	220.492	197.932	602.498
same_same	Mindy1	ENSMUSG00000038712	0.428163	1.33e-11	0.209658	6.1e-06	73.2968	73.5881	69.3218	95.9521	97.6976	97.5654	83.4525	83.2982	83.52	79.6206	97.0717	83.4236	260.116
same_same	Tnrc6b	ENSMUSG00000047888	-0.405946	1.42e-11	-0.385935	8.23e-12	101.882	101.644	102.872	81.8921	74.1873	75.0702	78.9669	79.0159	76.5242	95.4695	77.0499	78.169	250.688
same_same	Marf1	ENSMUSG00000060657	-0.39341	1.44e-11	-0.255204	2.84e-08	120.508	120.105	123.099	95.3254	93.3186	88.3243	103.59	99.1152	101.869	112.843	92.3228	101.524	306.691
same_same	Pdlim5	ENSMUSG00000028273	0.39436	1.62e-11	0.184262	1.39e-05	117.928	116.85	118.368	154.15	160.746	149.478	131.601	133.132	136.449	129.789	154.791	133.727	418.308
same_same	Cerk	ENSMUSG00000035891	-0.340699	1.63e-11	-0.634994	1.04e-18	206.868	201.575	218.2	165.547	161.001	167.849	135.409	130.922	136.848	195.107	164.799	134.393	494.299
same_same	Gclm	ENSMUSG00000028124	0.408781	1.68e-11	0.102418	0.0109449	170.703	171.206	173.449	231.029	233.786	219.467	176.296	194.811	182.259	191.895	228.094	184.455	604.444
same_same	Mrtfa	ENSMUSG00000042292	-0.439597	1.73e-11	-0.502423	1.47e-13	102.083	100.702	95.2933	78.3282	69.5532	72.0143	70.4796	71.4182	68.8227	91.4411	73.2986	70.2402	234.98
same_same	Cln8	ENSMUSG00000026317	-0.418829	1.73e-11	-0.567205	2.65e-15	79.4654	77.2718	80.2318	59.2553	56.8415	60.9324	55.635	54.0471	50.3206	72.2529	59.0097	53.3343	184.597
same_same	Capn2	ENSMUSG00000026509	0.332318	1.75e-11	0.353872	1.13e-12	232.671	232.072	228.772	284.723	299.725	288.904	292.374	295.791	298.211	248.522	291.117	295.459	835.099
up_same	Sema4c	ENSMUSG00000026121	0.739567	2.09e-11	0.660671	6.1e-11	20.2393	21.3311	20.4683	35.4435	33.8838	34.2399	32.9486	33.5334	31.6652	25.7476	34.5224	32.7157	92.9858
down_same	Crebrf	ENSMUSG00000048249	-0.756689	2.09e-11	-0.794322	1.01e-12	18.9088	21.631	21.5303	11.7101	12.3291	12.5915	11.9402	12.0181	11.7517	18.2904	12.2102	11.9034	42.404
up_same	Smim3	ENSMUSG00000038059	0.965689	2.09e-11	1.17472	1.42e-14	6.24918	5.52553	6.03428	11.8276	12.074	10.9715	13.4892	12.3635	14.2984	7.79579	11.6244	13.3837	32.8039
same_same	Map2k3	ENSMUSG00000018932	0.403955	2.3e-11	0.0498242	0.219449	125.064	125.245	123.003	164.411	166.953	162.769	125.308	129.195	131.969	137.553	164.711	128.824	431.088
same_same	Nfkbia	ENSMUSG00000021025	0.339768	2.38e-11	0.222635	5.99e-08	130.185	127.516	133.478	163.471	162.617	168.807	153.158	153.093	150.133	141.488	164.965	152.128	458.581
same_same	Clcn7	ENSMUSG00000036636	-0.42575	2.46e-11	-0.728215	1.65e-17	79.9895	78.7709	74.9699	59.9602	56.0762	58.0606	47.6964	48.0381	45.5954	71.2337	58.0324	47.1099	176.376
same_same	Rap2b	ENSMUSG00000036894	-0.401705	2.58e-11	-0.443511	5.07e-13	99.8659	98.817	98.6725	75.5084	73.7621	75.7697	73.1904	71.3491	74.0695	90.9993	75.0134	72.8697	238.882
same_same	Ccnd2	ENSMUSG00000000184	0.385073	2.78e-11	0.857591	6.9e-21	91.5203	85.5815	84.4316	114.281	113.258	114.354	156.062	159.862	158.541	94.7647	113.964	158.155	366.884
same_down	Sqstm1	ENSMUSG00000015837	0.361199	2.81e-11	-0.230194	1.27e-07	911.816	888.711	878.446	1121.43	1177.22	1142.62	739.1	772.788	772.053	962.861	1147.09	761.314	2871.26
same_same	Tgfbr1	ENSMUSG00000007613	-0.430831	2.85e-11	-0.656197	2.99e-16	78.1349	79.4991	78.9284	60.5477	58.0744	56.8825	48.5677	51.6988	49.8911	72.9917	58.5015	50.0525	181.546
up_down	Angptl2	ENSMUSG00000004105	0.732709	2.86e-11	0.00106478	0.991523	109.663	110.382	101.424	175.024	180.515	179.373	103.622	117.695	101.194	128.944	178.304	107.503	414.751
same_same	Tm6sf1	ENSMUSG00000038623	0.449521	2.92e-11	0.560144	3.3e-14	123.613	132.013	129.037	177.766	180.26	167.334	177.716	200.095	189.316	146.272	175.12	189.042	510.434
up_same	Sec24d	ENSMUSG00000039234	0.553166	3.29e-11	0.361925	7.88e-08	58.5407	57.0115	55.9981	84.7903	87.9193	79.525	73.3195	74.7681	72.6274	65.9333	84.0782	73.5716	223.583
same_same	Gyg	ENSMUSG00000019528	-0.405919	3.62e-11	-0.560335	3.82e-15	77.3286	77.0576	78.0112	57.5712	56.9265	60.7115	53.9569	49.9029	53.5731	70.88	58.4031	52.4776	181.761
same_same	Wdr81	ENSMUSG00000045374	-0.452317	3.98e-11	-0.570919	3.3e-14	78.5381	76.8006	76.0802	57.8062	54.3331	56.9561	49.9553	53.2874	52.6526	70.229	56.3652	51.9651	178.559
same_same	Syne1	ENSMUSG00000096054	0.385928	4.61e-11	0.0940107	0.0174924	149.255	157.199	150.954	197.975	203.728	196.125	163.097	170.844	154.49	168.709	199.276	162.811	530.795
up_same	Lif	ENSMUSG00000034394	2.53046	4.61e-11	2.849	1.76e-13	0.846663	1.15651	0.772388	4.73886	6.97233	4.60214	5.55059	6.59617	7.97766	2.22258	5.43778	6.70814	14.3685
same_same	Atp13a2	ENSMUSG00000036622	-0.380385	4.9e-11	-0.369333	2.08e-11	145.949	154.072	152.981	119.216	111.685	116.784	116.111	118.938	115.553	142.09	115.895	116.867	374.852
up_same	Sertad1	ENSMUSG00000008384	0.732836	4.97e-11	0.570902	3.17e-09	14.5949	14.1779	15.5926	23.1852	24.8708	25.5143	21.5247	23.0693	21.2635	17.6519	24.5234	21.9525	64.1278
up_same	Clec7a	ENSMUSG00000079293	0.690782	5.06e-11	0.501256	1.48e-08	18.2637	17.7759	19.1166	27.5324	31.6306	29.8587	26.0749	25.9703	25.9274	21.475	29.6739	25.9908	77.1397
up_same	Trib1	ENSMUSG00000032501	0.941002	5.32e-11	1.05514	4.7e-13	20.844	19.1466	21.9648	36.9709	44.1297	37.9585	39.3382	45.2062	44.0305	26.0274	39.6864	42.8583	108.572
same_same	Syk	ENSMUSG00000021457	-0.303898	5.85e-11	-0.289587	4.94e-11	248.355	239.611	243.109	198.053	193.61	200.506	197.627	198.299	202.203	226.924	197.39	199.376	623.69
up_same	Plk2	ENSMUSG00000021701	0.675982	6.24e-11	0.630357	8.74e-11	102.728	96.4184	91.6245	151.213	164.232	149.846	144.283	156.374	150.011	113.085	155.097	150.223	418.405
same_same	Slc39a10	ENSMUSG00000025986	0.387547	6.56e-11	0.636949	5.36e-17	80.9571	77.4859	77.4319	104.921	107.773	96.4241	121.145	121.701	124.145	86.6128	103.039	122.33	311.982
same_same	Prkd3	ENSMUSG00000024070	0.414026	7.09e-11	0.464913	1.13e-12	124.863	130.471	128.168	176.356	176.434	158.424	174.811	181.032	173.483	144.998	170.405	176.442	491.845
same_same	Lmna	ENSMUSG00000028063	0.439792	7.49e-11	0.340799	6.13e-09	1153.48	1150.64	1187.79	1508.48	1659.41	1568.56	1428.5	1501.34	1492.44	1282.3	1578.82	1474.09	4335.21
same_same	Nav2	ENSMUSG00000052512	-0.470423	7.49e-11	-0.753425	2.82e-16	95.8745	103.786	96.5002	72.9627	68.0652	72.5666	60.3466	60.0217	55.4754	91.0829	71.1982	58.6146	220.896
same_same	Pid1	ENSMUSG00000045658	-0.369965	7.58e-11	-0.237421	2.26e-07	450.183	468.771	478.977	351.89	360.265	369.386	388.025	388.621	408.947	433.212	360.514	395.198	1188.92
same_down	Tjp2	ENSMUSG00000024812	0.44143	7.6e-11	-0.13287	0.00567329	68.6604	68.8764	65.6047	88.3542	97.485	90.5334	59.5398	64.5112	61.4894	74.2784	92.1242	61.8468	228.249
up_same	Mir22hg	ENSMUSG00000085148	0.712341	7.6e-11	0.599595	8.31e-10	19.3926	21.4168	19.1649	32.1146	36.0945	30.4478	29.786	31.2196	30.0083	24.2321	32.8856	30.338	87.4557
same_same	Arhgap17	ENSMUSG00000030766	-0.42673	8.28e-11	-0.437807	8.26e-12	74.7886	68.962	67.246	52.0491	51.6973	53.4217	53.4406	51.4225	51.1798	62.7524	52.3893	52.0143	167.156
same_same	Uhrf1	ENSMUSG00000001228	-0.360925	8.38e-11	-0.714378	1.53e-18	277.141	276.619	266.184	214.854	207.554	216.08	166.873	166.631	166.365	252.553	212.829	166.623	632.005
up_down	Adgre5	ENSMUSG00000002885	1.41786	8.84e-11	0.271907	0.105175	4.59617	5.6112	4.10331	9.59521	14.2848	14.5428	6.03466	5.97454	5.36958	6.43657	12.8076	5.79292	25.0371
same_same	Anxa7	ENSMUSG00000021814	0.276963	8.89e-11	0.338184	1.99e-13	138.691	134.326	137.244	166.056	169.036	162.143	172.552	175.541	170.63	145.875	165.745	172.908	484.528
down_same	Igsf6	ENSMUSG00000035004	-0.597416	8.95e-11	-0.145036	0.0145074	96.6406	95.5189	104.417	62.7409	63.8988	68.9217	90.0035	87.4079	90.3623	87.559	65.1871	89.2579	242.004
same_same	Myo1c	ENSMUSG00000017774	0.359292	9.96e-11	0.180381	1.6e-05	229.083	245.222	232.344	295.846	311.544	299.25	260.426	273.586	266.822	257.804	302.213	266.945	826.962
down_same	Wee1	ENSMUSG00000031016	-0.528841	1.02e-10	-0.698734	3.27e-14	37.8983	39.5354	41.902	28.0415	27.4217	27.0974	25.0745	24.4162	23.9023	36.493	27.5202	24.4643	88.4775
up_same	Zc3h12a	ENSMUSG00000042677	0.620801	1.04e-10	0.855641	5.53e-15	23.1824	21.7595	25.6336	37.9892	34.3515	35.8231	39.9514	44.1011	43.3555	28.4608	36.0546	42.4693	106.985
down_same	Klhl24	ENSMUSG00000062901	-0.758605	1.1e-10	-1.237	4.91e-16	26.8916	29.598	28.0473	15.3915	16.8356	17.6722	13.0374	12.0181	10.8312	24.3456	16.6331	11.9623	52.941
up_same	Zfp36	ENSMUSG00000044786	0.504694	1.12e-10	0.815908	7.58e-17	27.1739	29.2125	28.4818	40.3782	42.5142	37.6639	51.2784	48.2107	49.7376	32.6908	40.1854	49.7423	122.619
same_same	Brd2	ENSMUSG00000024335	0.307602	1.13e-10	0.0113465	0.750634	306.29	307.502	303.741	387.451	385.093	363.201	311.027	309.675	304.133	332.898	378.582	308.278	1019.76
up_same	Ahdc1	ENSMUSG00000037692	0.583892	1.13e-10	0.335535	2.28e-06	20.844	21.7166	23.4613	33.7595	33.5012	31.5155	28.1725	27.0063	27.8604	26.3125	32.9254	27.6797	86.9176
same_same	Mpeg1	ENSMUSG00000046805	-0.257322	1.2e-10	-0.377756	4.32e-15	1963.37	1948.37	1937.53	1630.99	1636.41	1626.36	1536.06	1458.06	1507.66	1838.96	1631.25	1500.59	4970.81
same_same	Syne3	ENSMUSG00000054150	0.43941	1.2e-10	0.382358	8e-10	191.951	199.562	193.338	266.433	270.263	256.579	245.065	261.982	255.377	219.778	264.425	254.141	738.344
same_same	C77080	ENSMUSG00000050390	-0.407074	1.2e-10	-0.702004	7.98e-17	210.093	217.809	219.648	168.484	153.306	166.082	129.535	136.413	132.061	201.98	162.624	132.67	497.274
same_same	Abcc5	ENSMUSG00000022822	-0.487833	1.2e-10	-0.381499	4.81e-09	138.288	136.768	138.982	99.3593	95.4869	100.216	112.109	104.71	101.04	125.036	98.3542	105.953	329.343
down_same	Plekho1	ENSMUSG00000015745	-0.53472	1.2e-10	-0.80628	2.23e-15	154.657	140.751	132.706	95.7562	94.339	105.592	81.484	81.7787	81.9858	123.071	98.5623	81.7495	303.383
same_same	Dhcr7	ENSMUSG00000058454	-0.369067	1.25e-10	-0.36782	2.7e-11	95.1085	95.8615	90.8038	75.1951	69.2131	73.7447	72.2545	71.7981	74.407	87.2868	72.7176	72.8199	232.824
up_same	Mt2	ENSMUSG00000031762	0.541903	1.34e-10	0.727668	4.1e-14	348.543	317.996	318.031	456.301	447.589	529.541	535.923	563.955	530.883	364.109	477.81	543.587	1385.51
same_same	Ehbp1l1	ENSMUSG00000024937	0.349601	1.58e-10	0.277762	6.67e-09	170.139	168.422	172.049	221.434	219.501	209.747	201.403	211.043	206.56	187.302	216.894	206.335	610.531
same_same	Csf2rb	ENSMUSG00000071713	-0.309389	1.75e-10	-0.257168	2.04e-09	126.919	129.4	123.485	100.338	103.565	102.757	107.688	103.121	107.023	117.741	102.22	105.944	325.905
up_down	Il1rn	ENSMUSG00000026981	0.852794	1.78e-10	0.0774966	0.432847	59.7502	50.3294	43.0123	97.4795	91.9157	88.3611	59.6366	53.0802	49.5842	63.6071	92.5854	54.1003	210.293
same_same	Mink1	ENSMUSG00000020827	-0.290371	1.8e-10	-0.419197	8.58e-15	189.894	196.563	194.642	156.147	157.6	161.259	149.092	144.46	140.99	182.451	158.335	144.847	485.633
up_up	Il18rap	ENSMUSG00000026068	0.723065	1.81e-10	1.23049	1.78e-17	14.5949	13.6639	12.6961	22.0494	22.6175	23.158	30.5283	33.0499	32.8925	16.1365	22.6083	32.1569	70.9017
same_same	Gga2	ENSMUSG00000030872	-0.401248	1.99e-10	-0.667967	3.15e-16	61.242	59.4958	61.6462	45.6653	44.2148	48.0096	40.4677	36.9869	37.2802	55.6025	45.9632	38.2449	139.811
same_same	Gfpt1	ENSMUSG00000029992	0.459247	2.1e-10	0.266841	2.88e-06	225.857	211.855	203.476	300.585	301.511	280.178	253.746	265.09	253.199	238.638	294.091	257.345	790.074
same_same	Gtpbp4	ENSMUSG00000021149	0.348867	2.18e-10	0.234646	2.24e-07	129.459	124.346	123.534	157.949	170.609	152.57	150.641	143.113	150.318	135.276	160.376	148.024	443.676
same_same	Pdxk	ENSMUSG00000032788	-0.410433	2.23e-10	-0.54969	5.97e-14	137.482	134.54	127.299	101.905	95.5719	103.014	89.0677	91.8974	92.1113	121.248	100.164	91.0254	312.437
same_same	H13	ENSMUSG00000019188	0.346856	2.36e-10	0.325234	3.24e-10	359.267	356.375	345.547	453.873	452.138	443.794	434.592	452.684	442.453	385.265	449.935	443.243	1278.44
up_same	Fosb	ENSMUSG00000003545	1.75322	2.41e-10	1.41016	1.3e-08	1.69333	1.49917	1.78615	4.62136	6.50467	5.70666	4.03386	4.42047	4.75591	2.63556	5.6109	4.40341	12.6499
same_same	Hhex	ENSMUSG00000024986	0.437917	2.42e-10	0.187182	0.00023625	48.5823	49.3871	49.1914	66.1482	67.0449	66.1604	56.0868	55.7393	55.6902	54.9089	66.4512	55.8388	177.199
same_same	Ehd1	ENSMUSG00000024772	0.299243	2.48e-10	0.365389	7.13e-13	171.026	170.135	168.429	207.139	208.575	211.367	213.149	220.92	222.454	181.901	209.027	218.841	609.769
same_same	Midn	ENSMUSG00000035621	0.479348	2.73e-10	0.318158	3.4e-07	80.7555	82.9258	81.7766	116.2	113.385	112.587	97.0708	107.162	101.899	93.6341	114.057	102.044	309.735
down_same	Hbp1	ENSMUSG00000002996	-0.662525	2.74e-10	-0.710935	9.8e-12	24.0694	24.9291	26.1646	15.509	14.8375	16.9359	15.5223	13.7104	16.4769	22.2009	15.7608	15.2365	53.1982
same_same	Stx3	ENSMUSG00000041488	-0.39521	2.79e-10	-0.328022	2.4e-09	53.4607	52.257	55.274	40.2215	42.3016	39.9098	42.5976	43.2032	42.3737	49.2508	40.811	42.7248	132.787
same_same	Zfand2a	ENSMUSG00000053581	-0.421763	2.81e-10	-0.55827	9.99e-14	102.245	97.1894	93.5072	71.5528	73.6346	73.7816	66.3812	67.723	65.1713	87.4165	72.9896	66.4252	226.831
same_same	Pip4p1	ENSMUSG00000035953	-0.452856	2.9e-10	-0.327485	3.44e-08	42.8573	40.7776	40.5504	29.9997	29.6749	31.0737	32.5291	33.8442	32.7391	37.1092	30.2494	33.0375	100.396
down_down	Cd33	ENSMUSG00000004609	-0.661231	2.91e-10	-1.3884	4.39e-18	94.9472	105.328	101.472	66.0307	62.2833	62.3314	40.5	36.9524	37.6791	90.9436	63.5485	38.3771	192.869
down_same	Eepd1	ENSMUSG00000036611	-0.77869	2.91e-10	-0.6723	8.44e-10	14.3126	14.6491	14.2409	8.30279	8.0777	8.76248	8.93904	9.35896	8.83679	12.3976	8.38099	9.04493	29.8235
up_same	Ccl3	ENSMUSG00000000982	0.739213	3.13e-10	0.522003	1.34e-07	752.482	660.836	611.2	1132.74	1127.48	1119.76	949.571	994.847	963.149	801.593	1126.66	969.189	2897.44
same_same	Klf6	ENSMUSG00000000078	0.292746	3.26e-10	0.33404	5.52e-12	470.261	464.916	457.736	556.796	574.409	575.157	584.006	586.403	585.499	493.149	568.788	585.303	1647.24
same_same	Ehd4	ENSMUSG00000027293	0.283687	3.26e-10	0.148576	1.89e-05	280.165	280.089	279.508	336.811	346.703	338.828	303.959	311.401	315.486	298.803	340.781	310.282	949.866
same_same	Gclc	ENSMUSG00000032350	0.339937	3.27e-10	-0.12378	0.00176344	97.8904	99.9307	103.934	127.636	132.432	121.828	96.0059	90.7923	89.9021	110.5	127.298	92.2334	330.032
same_same	Snx30	ENSMUSG00000028385	-0.390518	3.27e-10	-0.568213	1.3e-14	86.5209	85.71	86.3143	67.7931	61.9007	67.3017	58.1844	59.0892	57.163	79.9391	65.6652	58.1455	203.75
same_down	Hpgds	ENSMUSG00000029919	-0.488245	3.41e-10	-1.52368	6.85e-22	66.201	59.5815	61.8393	43.0022	44.81	46.0214	22.9446	21.757	20.6499	54.8077	44.6112	21.7838	121.203
up_same	Tacc2	ENSMUSG00000030852	0.927021	3.41e-10	0.970194	2.03e-11	6.89426	7.88138	7.33768	14.4516	14.2848	13.3278	15.1673	15.4026	12.8256	9.89021	14.0214	14.4652	38.3768
same_same	Gas2l3	ENSMUSG00000074802	-0.33566	3.42e-10	-0.804914	7.65e-20	213.278	214.639	208.062	170.873	176.179	157.393	120.596	121.666	121.843	197.858	168.148	121.369	487.375
same_same	Rasgef1b	ENSMUSG00000089809	-0.369897	3.42e-10	-0.389149	2.4e-11	92.5282	95.0905	93.0727	70.6912	70.2334	76.0642	70.5119	72.9032	70.9705	86.2848	72.3296	71.4619	230.076
same_same	Stap1	ENSMUSG00000029254	0.475057	3.48e-10	0.690559	1.63e-14	213.198	221.749	224.861	313.274	322.3	281.614	336.134	366.761	361.818	253.295	305.729	354.904	913.928
same_same	Ccdc93	ENSMUSG00000026339	-0.344	3.48e-10	-0.223371	3.46e-07	61.887	61.3377	57.9291	48.211	46.2129	48.3777	51.8593	52.0441	51.4866	55.8259	47.6006	51.7967	155.223
up_same	Rhof	ENSMUSG00000029449	0.931273	3.48e-10	0.955096	3.23e-11	5.84601	6.21087	6.71012	11.2793	12.3291	12.076	12.4566	12.5016	11.3528	8.06675	11.8948	12.1037	32.0652
same_same	Tbc1d23	ENSMUSG00000022749	0.262959	3.68e-10	0.146089	8.12e-06	118.009	121.219	118.61	142.832	144.463	142.151	131.859	133.616	130.557	127.553	143.149	132.011	402.713
same_same	Cd80	ENSMUSG00000075122	0.428566	3.76e-10	0.590458	3.27e-14	56.4845	56.8401	54.9361	73.9418	79.459	73.4134	85.6792	83.1601	84.6246	61.906	75.6047	84.4879	221.999
same_same	Clic4	ENSMUSG00000037242	0.295034	3.81e-10	0.15523	2.08e-05	597.583	606.909	595.994	720.463	760.579	728.096	659.359	679.198	666.503	641.122	736.379	668.353	2045.85
down_same	Rftn1	ENSMUSG00000039316	-0.518604	3.82e-10	-0.577084	6.99e-12	49.2677	47.0313	50.2535	32.7412	32.0982	37.1485	34.2071	32.9808	31.0515	43.342	33.996	32.7465	110.084
same_same	Cd151	ENSMUSG00000025510	0.385024	3.96e-10	0.427412	7.07e-12	49.3081	47.2883	45.3295	61.2918	61.2629	63.0309	62.1215	65.3055	63.8213	51.3032	61.8619	63.7494	176.915
same_same	Kras	ENSMUSG00000030265	0.422812	4.18e-10	0.182202	0.000290153	69.0232	78.0856	73.2803	96.6179	104.67	94.3255	85.1629	81.4678	83.2131	82.6612	98.5378	83.2813	264.48
down_same	Foxred2	ENSMUSG00000016552	-0.505811	4.32e-10	-0.788653	4.28e-15	52.9366	54.7413	58.5084	40.7307	36.0945	39.7993	31.0769	32.0484	32.8618	51.3268	38.8748	31.9957	122.197
same_same	Tubb6	ENSMUSG00000001473	0.374453	4.35e-10	0.287047	3.61e-08	160.543	155.015	153.609	197.465	206.066	204.924	186.848	190.115	195.637	168.696	202.819	190.867	562.382
same_same	Il10ra	ENSMUSG00000032089	0.432396	4.37e-10	0.572246	7.34e-14	22.4567	23.4728	23.6544	30.9005	31.418	31.4787	33.9812	35.3292	34.0892	26.0092	31.2657	34.4665	91.7415
up_same	Cish	ENSMUSG00000032578	1.61559	4.73e-10	2.00378	1.44e-13	4.03173	4.54036	2.89645	13.0808	12.7117	9.90381	15.1996	16.1623	15.1882	6.83921	11.8988	15.5167	34.2547
same_same	Ell2	ENSMUSG00000001542	0.361684	4.91e-10	0.676021	2.56e-17	76.8851	77.6573	76.5629	101.161	101.949	94.0678	120.467	123.359	125.433	85.127	99.0592	123.086	307.273
up_same	Fnbp1l	ENSMUSG00000039735	0.512005	4.91e-10	0.297925	5.37e-06	55.0331	61.5518	59.1359	82.088	90.4277	78.2732	71.4155	71.5218	72.8422	67.5919	83.5963	71.9265	223.115
same_same	Mcoln2	ENSMUSG00000011008	-0.355266	4.91e-10	-0.527182	1.33e-14	90.5123	85.453	86.8936	71.6703	66.9598	66.9336	59.3784	60.7469	62.3178	81.339	68.5212	60.8144	210.675
same_same	Pvr	ENSMUSG00000040511	0.465875	4.91e-10	0.573474	6.74e-13	41.164	40.9489	41.3227	57.2188	56.5439	56.6984	58.2812	64.6493	60.8757	46.4968	56.8203	61.2688	164.586
same_same	Golph3l	ENSMUSG00000046519	-0.3009	4.91e-10	-0.398313	1.73e-13	64.2658	64.6787	65.653	53.1065	52.7601	52.0594	49.4067	49.3158	48.8785	61.1461	52.642	49.2004	162.988
same_same	Dnase2a	ENSMUSG00000003812	-0.441469	4.91e-10	-0.919878	5.9e-18	60.6372	60.8237	60.0049	44.8037	42.3866	46.2791	32.1418	32.7391	31.1129	55.2108	44.4898	31.9979	131.699
same_same	Plekhm2	ENSMUSG00000028917	-0.351997	5.26e-10	-0.628799	1.86e-16	92.9314	94.0625	91.1418	72.3753	72.3591	73.2293	59.7657	61.4031	58.8506	85.8598	72.6546	60.0064	218.521
same_same	Plek	ENSMUSG00000020120	0.396641	5.28e-10	0.334776	7.15e-09	1271.85	1316.32	1283.42	1666.2	1790.36	1640.28	1619.9	1630.43	1632.44	1421.98	1698.94	1627.59	4748.51
same_same	Slc4a7	ENSMUSG00000021733	0.393776	5.33e-10	0.598146	9.49e-15	215.012	230.573	233.02	294.24	316.221	281.099	335.617	344.037	347.335	252.611	297.186	342.33	892.127
same_same	Sfr1	ENSMUSG00000025066	0.403817	5.7e-10	0.228657	8.51e-06	72.0067	68.705	69.6114	89.1375	102.077	87.6984	82.194	79.7066	84.5325	75.818	92.9708	82.1443	250.933
same_same	Tec	ENSMUSG00000029217	0.42723	5.77e-10	0.402921	5.12e-10	58.1375	56.3261	56.6257	77.8191	80.6919	71.9775	73.1904	77.3582	75.8185	63.5903	76.8295	75.4557	215.875
same_same	Sh3tc1	ENSMUSG00000036553	0.485699	5.77e-10	0.19722	0.000714573	28.8672	29.2125	30.3645	41.6706	40.7711	41.2352	33.4649	33.8787	33.9357	33.7492	41.2256	33.7598	108.735
up_same	Slc20a1	ENSMUSG00000027397	0.566405	5.91e-10	0.504696	2.54e-09	352.978	357.103	343.23	506.039	549.836	504.174	483.934	505.142	505.508	402.124	520.016	498.195	1420.34
same_same	Jund	ENSMUSG00000071076	0.444656	6.31e-10	0.199429	0.000230781	66.6848	70.1186	77.4801	97.6753	99.4832	93.9573	80.0641	85.2667	80.2675	81.758	97.0386	81.8661	260.663
up_same	Cebpa	ENSMUSG00000034957	0.504384	6.4e-10	0.295765	5.72e-06	29.1494	30.4547	28.868	43.198	42.6842	39.7993	35.982	36.607	36.0836	34.1736	41.8939	36.2242	112.292
same_same	Eif1	ENSMUSG00000035530	0.415916	7.07e-10	0.423154	1.62e-10	180.46	172.191	170.263	225.194	226.218	246.27	227.639	230.348	243.319	189.216	232.56	233.768	655.545
down_same	Dnajb14	ENSMUSG00000074212	-0.502658	7.38e-10	-0.723015	4.59e-14	45.6795	43.2191	44.0744	30.8222	32.991	30.2269	27.9466	28.1805	24.608	39.3719	31.3467	26.9117	97.6302
same_same	Fam129b	ENSMUSG00000026796	0.398076	7.41e-10	-0.0548521	0.241339	557.991	561.934	547.382	721.951	767.551	707.81	504.652	550.21	550.305	610.422	732.437	535.056	1877.92
same_same	Spink5	ENSMUSG00000055561	0.368182	7.51e-10	0.488494	4.06e-13	490.823	502.095	491.577	637.318	677.123	601.85	701.73	691.458	689.546	543.663	638.764	694.245	1876.67
same_same	Nars	ENSMUSG00000024587	0.293429	8.03e-10	0.208638	2.73e-07	250.169	246.978	240.357	298.47	309.333	296.304	287.566	277.868	286.92	261.935	301.369	284.118	847.422
down_same	Zfp462	ENSMUSG00000060206	-0.529783	8.03e-10	-0.664884	1.09e-12	36.1243	36.8369	32.5851	24.7517	23.8079	24.6675	22.3315	22.275	22.1227	31.3912	24.409	22.243	78.0433
same_same	Rhbdf2	ENSMUSG00000020806	0.439485	8.77e-10	0.490431	2.24e-11	135.708	138.866	140.816	195.076	186.467	181.656	185.622	203.687	194.195	158.253	187.733	194.501	540.487
down_down	Card14	ENSMUSG00000013483	-1.12531	8.8e-10	-2.01435	2.45e-15	8.02314	8.43821	8.49626	4.1514	3.86879	3.42399	2.5494	1.79582	1.81032	7.02862	3.81473	2.05184	12.8952
same_same	Mef2a	ENSMUSG00000030557	0.379869	8.84e-10	0.0152413	0.754284	160.664	165.081	166.981	214.149	225.75	201.427	167.325	166.286	164.217	182.07	213.775	165.942	561.788
same_same	Sash1	ENSMUSG00000015305	-0.333213	9.02e-10	-0.140742	0.000508508	278.23	293.581	275.887	228.64	223.88	220.424	248.55	258.425	261.974	266.036	224.315	256.316	746.667
same_same	Myo1f	ENSMUSG00000024300	-0.311926	9.02e-10	-0.692316	1.5e-18	203.723	212.497	205.6	169.267	166.698	164.978	126.857	130.369	127.643	195.788	166.981	128.29	491.059
up_same	Tmem98	ENSMUSG00000035413	0.654088	9.03e-10	0.948104	1.73e-14	41.3252	38.8929	38.6194	66.0307	61.0504	60.196	70.8346	79.603	79.1936	47.8477	62.4257	76.5437	186.817
same_down	Dhrs9	ENSMUSG00000027068	0.416012	9.3e-10	-0.0999203	0.0424814	177.154	177.16	173.063	231.617	246.412	226.057	160.322	168.427	163.511	193.946	234.695	164.087	592.728
same_same	Cebpz	ENSMUSG00000024081	0.304666	9.76e-10	0.174303	1.03e-05	88.4158	91.2783	91.721	110.834	116.744	107.764	102.847	99.0461	104.108	97.9446	111.781	102.001	311.726
same_same	Csf2rb2	ENSMUSG00000071714	-0.346703	9.87e-10	-0.687217	3.28e-17	66.2816	64.4645	61.4048	50.0909	50.7619	50.4763	41.694	38.9208	38.8758	58.6534	50.443	39.8302	148.927
same_same	Cbx6	ENSMUSG00000089715	-0.370969	1.04e-09	-0.225191	2.69e-06	79.9895	79.3706	77.8663	59.3728	63.7288	60.5642	69.6728	67.723	65.693	72.2032	61.2219	67.6963	201.121
same_same	Gnpda1	ENSMUSG00000052102	-0.455531	1.12e-09	-0.852749	1.93e-16	35.963	38.8072	35.7712	27.2974	26.4438	26.8765	20.492	19.9957	20.7112	33.9586	26.8726	20.3997	81.2308
same_same	Smcr8	ENSMUSG00000049323	-0.237764	1.13e-09	-0.2809	8.2e-12	205.497	198.277	201.11	171.891	170.95	170.206	165.872	165.802	166.242	190.426	171.015	165.972	527.414
down_same	Arl11	ENSMUSG00000043157	-0.526278	1.14e-09	-0.731368	1.72e-13	41.4462	40.0494	40.2607	28.6681	27.7192	28.1651	23.7191	24.8651	24.7921	36.3261	28.1842	24.4588	88.969
same_same	AA414768	ENSMUSG00000083307	0.47758	1.23e-09	0.562541	5e-12	23.4647	22.5733	24.2337	32.5845	32.0557	33.0618	33.6585	35.0529	34.979	26.4638	32.5673	34.5635	93.5947
up_same	Kcnk6	ENSMUSG00000046410	0.754184	1.23e-09	0.452653	7.64e-06	10.3615	10.7941	9.22038	18.3288	15.6877	17.3041	13.9733	14.5392	13.2552	12.7811	17.1069	13.9226	43.8105
same_same	Flna	ENSMUSG00000031328	0.250673	1.24e-09	0.492763	4.61e-17	1127.72	1151.88	1150.57	1365.77	1372.36	1342.94	1577.43	1642.1	1607.16	1222.74	1360.36	1608.9	4191.99
up_down	Ccl7	ENSMUSG00000035373	3.38697	1.24e-09	1.31094	0.0185061	0.282221	0.128501	0.144823	1.99737	2.0832	1.98813	0.516334	0.518024	0.398883	0.756898	2.0229	0.477747	3.25754
up_same	Nckap1	ENSMUSG00000027002	0.601435	1.27e-09	0.951516	2.28e-15	30.7218	31.9538	30.2197	45.9003	50.8895	44.5487	60.1529	61.7139	58.0221	36.0246	47.1129	59.963	143.1
same_same	Slf2	ENSMUSG00000036097	-0.302742	1.38e-09	-0.556866	2.54e-16	77.006	82.7545	78.9284	65.4432	64.1539	63.8777	55.6996	53.1147	53.389	75.7087	64.4916	54.0677	194.268
up_same	Arrdc3	ENSMUSG00000074794	0.9046	1.43e-09	1.04042	8.58e-12	5.92664	7.36737	7.09631	11.4751	14.88	11.8551	14.0701	14.0902	13.6541	8.64626	12.7367	13.9381	35.3211
same_same	Vps18	ENSMUSG00000034216	-0.301319	1.44e-09	-0.419964	1.93e-13	104.301	105.67	105.286	88.4717	82.52	84.7162	74.6748	80.4663	80.4823	99.8094	85.236	78.5412	263.587
same_same	Stxbp5	ENSMUSG00000019790	-0.291568	1.51e-09	-0.54617	1.93e-16	226.543	226.161	227.758	193.549	177.497	184.712	158.579	150.883	156.424	215.823	185.252	155.295	556.37
same_same	Lima1	ENSMUSG00000023022	0.464848	1.51e-09	0.100139	0.0756009	56.6458	56.4975	53.9223	73.1586	82.9877	74.9965	59.7334	59.2274	60.262	61.1928	77.0476	59.7409	197.981
same_same	Mdc1	ENSMUSG00000061607	-0.350123	1.55e-09	-0.61151	1.12e-15	146.997	148.632	142.747	117.297	118.359	108.684	99.233	93.3824	94.3819	136.225	114.78	95.6657	346.671
same_same	Kdm7a	ENSMUSG00000042599	0.48244	1.63e-09	0.632512	7.13e-13	81.4813	84.0395	89.1625	121.722	126.352	107.764	133.021	129.989	131.233	98.308	118.613	131.414	348.335
down_up	Trp53inp1	ENSMUSG00000028211	-0.577794	1.74e-09	0.0184109	0.791484	29.5123	30.4975	34.4678	20.052	22.1074	20.9858	32.3354	31.2196	31.7879	28.3391	21.0484	31.781	81.1685
down_same	Sgsh	ENSMUSG00000005043	-0.550619	1.79e-09	-0.88255	1.27e-14	36.084	37.9077	38.5711	24.83	25.9337	25.9929	19.6852	19.5122	21.6931	33.7696	25.5855	20.2969	79.652
same_same	Sirpa	ENSMUSG00000037902	-0.251056	1.81e-09	-0.580885	1.09e-18	1356.72	1391.75	1359.84	1156.01	1134.32	1161.76	922.334	904.227	920.039	1302.53	1150.7	915.534	3368.76
same_same	Tgfbr2	ENSMUSG00000032440	-0.272067	1.86e-09	-0.183047	1.1e-06	199.651	200.29	201.11	167.779	164.105	165.788	176.78	169.601	182.811	189.726	165.89	176.397	532.014
same_same	Septin7	ENSMUSG00000001833	0.361764	1.91e-09	0.177532	0.00014283	221.785	221.835	227.71	278.653	316.135	268.213	253.681	253.383	252.063	242.732	287.667	253.042	783.442
same_same	M6pr	ENSMUSG00000007458	0.250175	2.09e-09	0.018125	0.57455	423.735	435.403	427.42	497.149	521.522	511.537	436.302	425.332	441.134	453.324	510.069	434.256	1397.65
same_same	C920009B18Rik	ENSMUSG00000097352	0.395185	2.13e-09	0.674774	6.82e-16	33.544	33.0675	32.6334	44.7646	42.089	43.6651	53.2792	53.3219	51.9775	36.8218	43.5062	52.8596	133.188
same_down	Atp2b1	ENSMUSG00000019943	0.349813	2.22e-09	-0.311753	1.02e-08	389.546	396.639	383.056	483.873	514.549	491.84	313.286	317.583	311.221	421.189	496.754	314.03	1231.97
same_same	Flnb	ENSMUSG00000025278	0.309245	2.22e-09	0.167975	3.96e-05	111.034	113.98	111.803	137.388	137.703	142.151	125.147	126.501	126.753	121.057	139.081	126.134	386.271
same_same	Xdh	ENSMUSG00000024066	-0.446795	2.34e-09	-0.61986	4.06e-13	93.133	95.9472	95.9209	69.203	68.5754	71.1307	64.4772	61.852	59.1267	87.0237	69.6364	61.8187	218.479
same_same	Cd300lb	ENSMUSG00000063193	0.341075	2.38e-09	-0.0823988	0.0496927	256.539	256.616	257.688	326.002	328.124	322.334	235.126	242.124	250.713	280.102	325.487	242.654	848.243
same_same	Slc1a5	ENSMUSG00000001918	0.297464	2.43e-09	0.154895	7.84e-05	373.217	381.433	356.264	454.734	455.454	455.318	409.388	416.802	410.85	397.477	455.169	412.347	1264.99
up_same	Gm8995	ENSMUSG00000063286	0.710111	2.45e-09	1.16527	9.57e-16	12.9822	13.1071	13.372	21.8144	22.8301	20.0285	29.3665	29.7346	29.3639	16.0978	21.5577	29.4883	67.1438
same_same	Hnrnpdl	ENSMUSG00000029328	0.242295	2.47e-09	-0.000636538	0.986883	138.409	139.68	140.864	160.729	167.974	166.818	139.507	142.526	136.756	147.091	165.174	139.596	451.861
same_same	Gas5	ENSMUSG00000053332	0.414583	2.47e-09	0.294658	6.42e-07	107.526	96.7182	99.638	123.876	134.302	146.937	123.081	129.402	120.708	106.744	135.039	124.397	366.18
same_same	Dtl	ENSMUSG00000037474	-0.356178	2.47e-09	-0.752646	2.26e-17	81.1587	78.8566	81.1007	64.6599	59.86	63.6568	48.8904	47.52	46.7	74.8724	62.7256	47.7035	185.301
same_same	Pfkp	ENSMUSG00000021196	0.299156	2.54e-09	0.333631	8.29e-11	258.716	255.931	252.812	311.472	317.538	315.412	322.548	325.561	319.168	273.405	314.808	322.425	910.638
up_same	Pdlim7	ENSMUSG00000021493	0.743439	2.62e-09	0.563137	2.23e-07	23.7872	24.5008	21.5786	38.1458	41.2388	38.0689	33.1745	36.6415	33.813	28.0751	39.1512	34.543	101.769
same_same	Il13ra1	ENSMUSG00000017057	0.309309	2.68e-09	0.467294	3.07e-14	60.6372	59.0247	61.791	74.7251	76.5255	73.5975	83.2912	83.2637	84.1643	65.1803	74.9494	83.573	223.703
same_same	Ptgir	ENSMUSG00000043017	0.258795	2.72e-09	0.243381	2.86e-09	112.767	118.092	109.148	136.644	135.79	134.64	130.374	136.378	135.988	121.295	135.691	134.247	391.233
same_same	Fhl3	ENSMUSG00000032643	0.37805	3.1e-09	0.474868	4.49e-12	87.4885	92.0065	91.4797	115.377	111.685	124.552	124.114	123.566	128.624	99.6212	117.205	125.435	342.261
same_same	Tnks1bp1	ENSMUSG00000033955	0.293076	3.29e-09	0.288375	1.29e-09	91.9234	89.1795	94.5692	113.419	113.81	110.451	112.109	113.102	111.319	99.056	112.56	112.177	323.793
same_same	Rad54l	ENSMUSG00000028702	-0.309062	3.29e-09	-0.576188	5.12e-16	84.0616	88.28	82.9834	68.4197	67.4275	70.2103	59.3462	55.6357	56.3039	79.8944	68.6858	57.0953	205.675
same_same	Rnf157	ENSMUSG00000052949	-0.35894	3.33e-09	-0.473032	1.82e-12	83.0536	86.7808	81.68	67.5972	60.6677	67.6331	62.6055	57.915	60.6609	78.686	65.2994	60.3938	204.379
same_down	F10	ENSMUSG00000031444	-0.327128	3.43e-09	-1.07595	6.57e-22	225.333	215.796	216.027	171.382	174.138	178.379	110.141	101.774	99.9049	201.068	174.633	103.94	479.641
same_same	Fbxw11	ENSMUSG00000020271	0.299577	3.56e-09	0.2513	3.79e-08	99.2612	102.929	99.8311	124.738	124.482	122.564	115.659	121.632	122.212	109.166	123.928	119.834	352.928
same_same	Zfp367	ENSMUSG00000044934	-0.315499	3.56e-09	-0.518164	1.15e-14	82.6101	83.7825	84.8178	67.2839	66.7473	67.7067	58.2812	57.2934	59.679	78.6281	67.246	58.4179	204.292
same_same	Atad2	ENSMUSG00000022360	-0.280602	3.58e-09	-0.606528	1.56e-17	215.052	217.98	217.958	181.33	184.512	170.316	146.833	141.938	138.781	205.756	178.719	142.517	526.992
same_same	Slc12a4	ENSMUSG00000017765	0.298673	3.74e-09	0.38831	2.58e-12	90.1495	98.0889	92.1072	116.396	110.749	117.483	122.726	122.323	121.874	102.197	114.876	122.308	339.381
same_same	Sod2	ENSMUSG00000006818	-0.29234	3.86e-09	-0.247614	4.07e-08	375.273	374.665	388.077	304.031	305.677	319.426	320.74	310.02	327.636	355.591	309.711	319.466	984.768
same_same	Numa1	ENSMUSG00000066306	-0.247207	4.33e-09	-0.28715	5.44e-11	276.294	274.949	274.97	235.141	235.614	225.505	221.346	227.136	228.621	261.687	232.087	225.701	719.474
same_down	Itpkb	ENSMUSG00000038855	0.371827	4.5e-09	-0.145436	0.00309882	59.3471	57.654	55.805	75.2343	73.4645	75.107	51.343	53.5982	51.548	62.8977	74.6019	52.163	189.663
down_down	Tspan10	ENSMUSG00000039691	-0.899848	4.55e-09	-2.84971	3.53e-19	13.5063	12.2076	12.6478	6.89288	6.46216	7.17934	1.96852	1.45047	1.87168	10.5828	6.84479	1.76356	19.1911
same_same	Ctnnb1	ENSMUSG00000006932	-0.241058	4.57e-09	-0.647318	8.07e-20	880.973	858.984	877.046	733.387	741.788	739.141	549.347	561.365	560.154	823.139	738.105	556.956	2118.2
down_same	Gdf15	ENSMUSG00000038508	-1.15031	4.71e-09	-1.20567	3.09e-10	15.885	14.3492	12.5996	6.26626	6.03701	7.03207	6.38964	5.62919	6.59691	11.0717	6.44512	6.20525	23.7221
down_same	4930430E12Rik	ENSMUSG00000085295	-0.679384	4.86e-09	-0.63127	3.4e-09	21.7713	18.1186	18.7787	12.2975	11.1387	13.1805	12.747	12.1218	13.0711	16.3983	12.2056	12.6466	41.2505
same_same	Kif21b	ENSMUSG00000041642	-0.401189	5.15e-09	-0.00728389	0.891854	71.0391	77.8286	70.0942	55.1431	52.9302	57.6188	72.9967	73.5594	71.4921	67.6886	55.2307	72.6827	195.602
same_same	Rnf149	ENSMUSG00000048234	-0.250153	5.21e-09	-0.438523	3.84e-15	155.705	155.529	156.795	131.043	129.838	132.542	114.271	118.178	112.976	147.789	131.141	115.142	394.072
same_same	Cdca7l	ENSMUSG00000021175	-0.404969	6.45e-09	-0.588314	4.13e-13	59.1052	56.2833	59.1359	43.5897	42.4292	45.6164	40.3709	36.8487	38.753	53.003	43.8784	38.6575	135.539
same_same	Trim2	ENSMUSG00000027993	-0.456822	6.53e-09	-0.122585	0.0259295	44.1878	46.1746	45.6674	34.7386	29.8024	34.2768	44.0175	41.9599	38.9985	42.1935	32.9393	41.6586	116.791
same_same	Ddx5	ENSMUSG00000020719	0.23737	6.6e-09	-0.0559795	0.06683	794.694	765.179	794.449	911.466	949.044	914.906	751.169	768.574	744.991	823.698	925.139	754.912	2503.75
same_same	Mthfd2	ENSMUSG00000005667	0.311603	6.65e-09	0.142993	0.000610486	230.575	222.306	219.696	275.676	277.83	281.393	252.746	243.022	247.031	239.226	278.3	247.6	765.126
same_same	Spp1	ENSMUSG00000029304	0.299328	6.93e-09	0.634729	5.58e-17	12486.5	11844.6	11959.3	15126.1	15454	14077.8	18633.7	18532.6	19179.7	12976.6	14886	18782	46644.6
same_same	Tpra1	ENSMUSG00000002871	-0.424253	7.26e-09	-0.10578	0.038874	29.4719	29.2553	28.1922	21.0703	22.0223	21.7589	27.1075	27.5934	26.2035	26.1726	21.6172	26.9682	74.7579
same_same	Cd36	ENSMUSG00000002944	0.279919	7.47e-09	0.176199	1.12e-05	206.626	203.459	201.062	243.679	259.932	238.722	221.378	238.153	231.168	216.067	247.444	230.233	693.744
same_same	Plscr4	ENSMUSG00000032377	-0.491593	8.02e-09	-0.542381	2.12e-10	40.6398	39.5782	39.6814	28.0023	29.8875	27.5392	27.3657	26.8682	28.0752	35.754	28.4763	27.4364	91.6667
same_same	Rsrp1	ENSMUSG00000037266	-0.286892	8.1e-09	-0.204091	1.55e-06	270.045	270.408	279.315	219.906	226.898	225.026	235.513	246.683	229.45	256.543	223.944	237.215	717.702
same_same	Mnt	ENSMUSG00000000282	-0.396536	8.11e-09	-0.490988	1.91e-11	68.0556	72.9884	68.2115	54.3989	50.3793	54.0476	51.0203	49.3504	48.5717	65.1996	52.9419	49.6474	167.789
same_same	Kif3c	ENSMUSG00000020668	0.368695	8.31e-09	0.27167	7.86e-07	38.0192	38.1647	38.6677	48.3285	50.847	49.1509	47.535	46.3804	44.7363	41.7203	49.4421	46.2172	137.38
same_same	H3f3b	ENSMUSG00000016559	0.251525	8.35e-09	0.34395	2.81e-12	318.789	303.776	311.321	369.396	383.095	359.446	389.284	399.949	396.152	328.164	370.646	395.128	1093.94
same_same	Ndst1	ENSMUSG00000054008	-0.479536	8.35e-09	-0.250025	7.99e-05	38.9465	41.1631	38.0401	28.9423	29.2498	26.7292	34.0458	33.2226	32.1868	36.0485	28.3071	33.1517	97.5073
same_same	Steap3	ENSMUSG00000026389	-0.396651	8.67e-09	-0.477926	3.6e-11	44.9135	45.6606	45.9571	34.8169	33.2886	35.4549	33.5295	30.218	34.0892	42.1448	34.5201	32.6122	109.277
same_same	Tes	ENSMUSG00000029552	0.286724	8.7e-09	0.101076	0.00743321	246.016	258.029	254.453	301.211	318.261	305.803	267.687	268.958	276.763	271.231	308.425	271.136	850.793
same_same	Tlr13	ENSMUSG00000033777	-0.392439	8.7e-09	-0.64149	3.79e-14	38.624	40.2636	38.378	29.4122	30.2276	29.7483	23.9127	26.7646	24.608	36.0179	29.796	25.0951	90.9091
same_same	AW549877	ENSMUSG00000041935	-0.379642	8.75e-09	-0.06755	0.147897	50.7998	53.7133	52.812	40.0257	41.5364	39.3943	50.4071	49.7648	49.8604	48.8503	40.3188	50.0108	139.18
same_same	Phf8	ENSMUSG00000041229	0.417666	8.8e-09	0.416788	2.02e-09	35.4389	34.3097	36.5436	49.7776	47.7434	44.4751	46.0506	47.1056	48.5717	40.2103	47.332	47.2426	134.785
same_same	Taf1d	ENSMUSG00000031939	0.270859	8.85e-09	0.128676	0.000449021	64.8302	64.9785	65.8461	80.4431	79.374	76.2851	71.5768	72.8687	69.4977	70.4226	78.7007	71.3144	220.438
same_same	Soat1	ENSMUSG00000026600	-0.252649	8.92e-09	-0.637904	8.73e-19	430.589	444.441	447.261	372.96	375.91	360.992	284.565	283.393	281.734	421.554	369.954	283.231	1074.74
same_same	Picalm	ENSMUSG00000039361	0.270394	8.92e-09	0.289966	7.23e-10	216.705	219.865	220.42	265.572	275.917	251.093	269.268	264.676	269.215	235.286	264.194	267.72	767.199
same_same	Rassf4	ENSMUSG00000042129	-0.339548	9.24e-09	0.0142682	0.76738	322.095	341.898	345.788	262.047	263.503	272.3	347.912	335.058	336.688	316.578	265.95	339.886	922.414
same_same	Baz1a	ENSMUSG00000035021	0.25595	9.56e-09	0.188355	1.04e-06	122.04	129.529	128.12	153.915	152.498	146.9	142.895	144.805	144.764	137.188	151.105	144.155	432.447
down_same	Rab20	ENSMUSG00000031504	-0.859654	9.59e-09	-0.764771	1.29e-08	12.0549	11.4366	11.6341	6.07044	6.54718	6.73754	7.00278	6.69977	6.96511	9.7137	6.45172	6.88922	23.0546
same_same	Prkcd	ENSMUSG00000021948	0.273764	9.86e-09	0.209784	5.52e-07	160.1	162.039	162.201	192.531	200.582	192.517	182.524	193.81	183.885	172.257	195.21	186.74	554.207
up_same	Sdc1	ENSMUSG00000020592	0.682098	9.87e-09	0.511891	7.64e-07	9.67615	10.1516	9.41348	15.4307	16.2404	15.3527	13.4892	13.6068	14.6053	11.6652	15.6746	13.9004	41.2403
up_same	Stk40	ENSMUSG00000042608	0.55288	1.02e-08	0.764998	1.17e-12	36.4872	37.308	34.1782	52.3624	53.823	52.5012	54.5055	63.8896	65.3554	41.2829	52.8955	61.2502	155.429
same_same	Wdr1	ENSMUSG00000005103	0.242033	1.03e-08	0.255935	1.18e-09	326.328	318.939	316.1	380.401	381.565	375.13	377.053	388.207	382.836	338.48	379.032	382.699	1100.21
same_same	Snx27	ENSMUSG00000028136	-0.289942	1.04e-08	-0.247552	6.66e-08	161.43	169.107	168.96	139.424	137.831	131.29	140.378	139.107	141.051	159.164	136.182	140.179	435.524
same_same	Pla2g5	ENSMUSG00000041193	0.361038	1.06e-08	0.705012	4.4e-16	120.549	119.677	112.093	150.469	154.241	148.189	184.041	194.397	196.281	127.413	150.966	191.573	469.952
up_same	Iffo2	ENSMUSG00000041025	0.535176	1.08e-08	0.546008	1.5e-09	27.7383	28.4415	26.3095	39.0466	41.6639	39.1366	40.8227	38.7136	40.9929	31.2659	39.949	40.1764	111.391
same_same	Brca2	ENSMUSG00000041147	-0.373249	1.17e-08	-0.513182	2.8e-12	41.4865	42.6194	44.5088	32.2321	33.5012	33.43	30.851	29.3201	29.7935	39.7868	33.0544	29.9882	102.829
same_same	Cd9	ENSMUSG00000030342	0.300475	1.21e-08	0.339775	3.49e-10	826.424	777.344	767.271	990.969	977.954	951.355	1001.14	1008.94	990.825	845.195	973.426	1000.3	2818.92
same_same	Arsg	ENSMUSG00000020604	-0.424923	1.21e-08	-0.198295	0.000395523	41.2849	41.2487	40.1642	29.8822	28.1019	33.2091	37.6924	35.0875	34.2426	37.0984	30.3977	35.6741	103.17
up_same	Tnfrsf12a	ENSMUSG00000023905	0.677481	1.21e-08	0.292619	0.00184502	15.6834	13.5782	14.965	22.9893	24.2331	23.5998	17.6522	18.3035	18.2566	17.1775	23.6074	18.0707	58.8557
same_same	Eya3	ENSMUSG00000028886	-0.230411	1.23e-08	-0.492879	8.31e-17	144.457	143.278	141.057	122.74	119.252	123.485	100.524	99.3569	104.784	135.692	121.826	101.555	359.072
same_same	Aggf1	ENSMUSG00000021681	0.279464	1.23e-08	0.04163	0.269165	84.5857	83.911	83.2731	102.336	101.949	101.394	87.9059	84.2652	86.9565	89.8399	101.893	86.3759	278.109
up_down	Dusp18	ENSMUSG00000047205	0.526116	1.25e-08	-0.0926161	0.207371	26.811	26.514	25.1991	35.6785	38.0077	39.5048	25.5263	23.8636	24.3319	29.1305	37.7303	24.5739	91.4348
same_same	Retreg2	ENSMUSG00000049339	-0.278085	1.59e-08	-0.320227	2.03e-10	98.2936	97.1465	96.7898	81.6572	76.6956	82.4704	79.7736	75.6314	78.6106	91.8645	80.2744	78.0052	250.144
same_down	Gpr137b-ps	ENSMUSG00000097715	-0.350664	1.67e-08	-1.03127	1.06e-19	73.7	68.705	72.9906	56.6705	56.9265	55.373	36.0789	34.0169	35.2244	66.1221	56.3233	35.1067	157.552
same_same	Hectd1	ENSMUSG00000035247	0.254247	1.69e-08	0.0904904	0.00877026	282.14	282.487	272.943	330.428	343.089	325.721	297.279	301.524	293.148	295.286	333.079	297.317	925.683
down_down	Il7r	ENSMUSG00000003882	-1.02082	1.71e-08	-2.59533	1.84e-16	8.78917	7.19604	6.46875	3.36811	3.69873	4.04989	1.45219	1.31233	0.981866	5.67763	3.70558	1.24879	10.632
same_same	Mcl1	ENSMUSG00000038612	-0.237316	1.73e-08	-0.382349	1.4e-13	671.323	695.66	695.777	577.044	606.167	566.726	519.464	530.18	532.816	656.16	583.312	527.487	1766.96
same_same	Bcat1	ENSMUSG00000030268	0.248652	1.82e-08	0.289344	2.12e-10	132.886	131.67	123.63	154.267	153.136	154.153	160.096	158.066	156.638	136.523	153.852	158.267	448.642
same_same	Uhrf1bp1l	ENSMUSG00000019951	0.34865	1.88e-08	0.226734	1.24e-05	92.9314	94.448	91.2866	114.438	126.352	114.538	108.43	108.75	109.018	100.057	118.443	108.733	327.233
same_same	Frmd4a	ENSMUSG00000026657	0.451474	1.88e-08	0.486654	8e-10	31.6491	31.3113	32.7782	46.292	44.1297	40.5357	42.0812	47.4855	44.5828	36.7938	43.6525	44.7165	125.163
same_same	Mcm2	ENSMUSG00000002870	-0.227079	1.97e-08	-0.518375	3.04e-17	245.169	245.479	245.523	209.097	204.706	214.975	171.713	170.015	172.195	233.366	209.593	171.308	614.267
same_same	Zbtb38	ENSMUSG00000040433	-0.325591	1.98e-08	-0.506286	3.1e-13	73.5387	75.0444	76.0319	60.626	58.542	59.9015	53.6342	52.1477	52.2537	70.5675	59.6899	52.6785	182.936
same_same	Tfe3	ENSMUSG00000000134	0.28783	2.03e-08	0.147892	0.000299323	106.034	106.056	107.7	133.275	128.69	128.345	115.304	115.554	123.224	115.677	130.103	118.027	363.808
same_same	Lrrfip2	ENSMUSG00000032497	0.333952	2.03e-08	0.238715	3.08e-06	99.7853	102.329	96.3554	120.665	128.69	127.13	118.176	121.736	112.638	106.45	125.495	117.517	349.461
same_down	Gla	ENSMUSG00000031266	-0.406161	2.06e-08	-1.30455	2.77e-20	65.5559	65.2355	65.0737	47.7802	50.3368	49.74	28.4952	24.3126	26.3876	59.3631	49.2857	26.3985	135.047
same_same	Mat2a	ENSMUSG00000053907	0.239828	2.08e-08	-0.0452845	0.167805	316.047	323.693	321.748	367.712	388.24	379.437	309.865	321.209	300.758	337.718	378.463	310.611	1026.79
up_same	Nfkbiz	ENSMUSG00000035356	0.510088	2.16e-08	0.868395	1.32e-14	20.1183	20.4316	19.4062	27.8457	29.5899	28.0915	34.4653	37.6776	37.4336	22.5612	28.509	36.5255	87.5957
same_same	Itpripl1	ENSMUSG00000074825	0.261281	2.17e-08	0.275946	1.61e-09	57.4521	57.4827	56.3843	70.887	66.4922	67.9644	69.3179	68.4137	69.7432	61.5847	68.4479	69.1582	199.191
same_same	Iqgap1	ENSMUSG00000030536	0.22253	2.2e-08	-0.0659647	0.0300638	1327.65	1330.58	1324.21	1531.98	1597.39	1517.34	1255.37	1280.59	1268.51	1395.59	1548.9	1268.16	4212.65
same_up	Gdpd5	ENSMUSG00000035314	-0.408289	2.21e-08	0.299725	3.37e-07	27.7786	28.5272	26.6474	21.8144	20.0242	20.6912	33.3681	35.3637	33.5675	25.663	20.8433	34.0998	80.6061
same_same	Eaf1	ENSMUSG00000021890	0.240425	2.24e-08	0.062536	0.0563733	178.283	178.573	171.422	202.478	216.312	205.661	180.814	185.073	185.972	184.158	208.15	183.953	576.261
same_same	Cmtm4	ENSMUSG00000096188	-0.275533	2.24e-08	-0.513143	5.17e-15	87.2869	93.2487	86.2661	74.0202	74.6124	71.9775	64.1223	62.5773	60.3848	84.5116	73.5367	62.3614	220.41
up_same	Rcsd1	ENSMUSG00000040723	0.662342	2.24e-08	0.915251	1.89e-12	11.4501	9.93739	11.2962	17.1539	18.3236	16.3468	20.6856	19.6849	21.2022	12.7958	17.2748	20.5242	50.5948
same_same	Tbx15	ENSMUSG00000027868	0.326493	2.29e-08	0.117951	0.0160997	26.2466	26	26.5991	33.2112	31.8006	33.7245	28.3016	28.8021	28.4434	28.6034	32.9121	28.5157	90.0312
same_same	Mdfic	ENSMUSG00000041390	-0.258488	2.3e-08	-0.557256	1.64e-16	196.748	198.062	204.683	164.842	171.375	164.904	136.054	133.098	138.044	189.196	167.04	135.732	491.968
same_same	P2rx7	ENSMUSG00000029468	-0.489551	2.37e-08	-0.481561	6.79e-09	41.3655	42.9192	37.9435	29.6472	27.7192	29.7483	29.2052	30.1835	28.3821	36.8367	29.0382	29.2569	95.1318
same_down	Tecpr1	ENSMUSG00000066621	-0.341341	2.39e-08	-0.886914	2.62e-18	75.5546	71.0181	72.9424	60.0777	56.5439	56.6984	40.8549	40.6131	37.403	68.0127	57.7733	39.6237	165.41
same_same	Map2k4	ENSMUSG00000033352	0.313092	2.47e-08	0.111229	0.0099608	55.4363	56.5403	58.6049	72.1795	72.5717	67.1545	61.831	61.2304	60.9984	62.4416	70.6352	61.3533	194.43
same_same	Anxa2	ENSMUSG00000032231	0.273812	2.49e-08	0.557429	6.67e-16	457.359	441.657	422.931	519.864	538.017	540.586	633.058	655.127	657.543	461.484	532.822	648.576	1642.88
same_same	Gns	ENSMUSG00000034707	-0.225319	2.6e-08	-0.502708	7.58e-17	244.242	243.509	240.985	209.567	206.024	207.796	174.94	166.942	172.41	231.354	207.796	171.431	610.58
up_same	Cep19	ENSMUSG00000035790	0.665861	2.61e-08	0.448042	1.06e-05	8.02314	7.49587	7.8687	11.9451	12.6692	12.5178	10.7462	11.1202	10.0948	9.10321	12.3774	10.6538	32.1343
same_same	Ptpn6	ENSMUSG00000004266	0.294293	2.65e-08	0.239558	4.95e-07	368.057	379.591	366.884	445.374	458.601	462.791	450.276	428.682	436.9	397.283	455.589	438.619	1291.49
same_same	Pld2	ENSMUSG00000020828	-0.358065	2.65e-08	-0.304562	1.14e-07	37.1322	37.1795	35.5781	28.2373	29.0797	28.5333	29.1406	30.0454	29.8855	33.665	28.6168	29.6905	91.9723
down_same	Hilpda	ENSMUSG00000043421	-0.532506	2.65e-08	-0.532285	4.96e-09	33.9875	32.6392	30.461	20.7178	22.405	24.0784	22.7187	23.2075	21.4476	27.9393	22.4004	22.4579	72.7977
same_same	Ppp1r12b	ENSMUSG00000073557	-0.304139	2.71e-08	-0.566046	7.37e-15	216.101	227.703	226.551	178.823	177.879	185.89	155.804	145.461	151.269	211.026	180.864	150.845	542.735
same_same	Anxa1	ENSMUSG00000024659	0.277438	2.72e-08	0.0212778	0.601205	291.776	297.136	305.528	339.514	381.905	362.649	307.219	306.256	294.161	314.059	361.356	302.545	977.96
same_same	4632415L05Rik	ENSMUSG00000048106	-0.339885	2.86e-08	-0.120491	0.00750475	38.0998	39.7067	38.8125	31.2138	29.7599	31.0737	35.3044	36.0199	35.9302	36.5777	30.6825	35.7515	103.012
same_same	Sephs2	ENSMUSG00000049091	-0.276818	3.13e-08	-0.172399	2.92e-05	169.494	167.608	167.222	135.899	135.323	144.875	147.22	148.258	152.036	156.91	138.699	149.171	444.78
same_same	Pag1	ENSMUSG00000027508	-0.346156	3.14e-08	-0.232787	7.26e-06	65.2737	69.0905	70.8666	57.3363	51.2296	52.5749	58.3135	58.364	57.746	65.7645	53.7136	58.1412	177.619
same_same	Sat1	ENSMUSG00000025283	0.37679	3.18e-08	0.530357	4.19e-12	85.2711	79.0279	81.3904	104.451	114.108	100.989	116.756	118.213	120.033	88.2897	106.516	118.334	313.14
same_same	Naaa	ENSMUSG00000029413	-0.287519	3.18e-08	-0.438576	8.17e-13	71.6035	73.9307	71.4459	57.2971	60.9653	59.607	55.2155	52.5276	52.3764	67.5579	59.2898	53.3732	180.221
down_same	Ung	ENSMUSG00000029591	-0.596378	3.3e-08	-0.958224	4.16e-13	24.3113	23.9011	26.1646	15.5482	15.2626	18.1509	11.5207	13.9176	12.8256	21.8713	16.3205	12.7546	50.9465
same_same	Dlgap4	ENSMUSG00000061689	0.411752	3.41e-08	0.57373	3.44e-12	30.7621	29.5123	27.6611	39.6732	39.2406	38.4003	43.3721	45.6206	42.343	32.2822	39.1047	43.7786	115.165
up_same	Map1b	ENSMUSG00000052727	0.594917	3.43e-08	0.404764	1.04e-05	13.9901	14.4777	13.2271	19.817	22.8726	20.544	17.9426	18.269	19.0543	15.8406	21.0779	18.422	55.3405
same_same	AU020206	ENSMUSG00000097415	-0.464385	3.71e-08	-0.35349	1.03e-06	35.6808	36.4514	41.1296	28.394	26.869	26.582	30.6573	29.7	28.0752	35.325	27.2816	29.4775	92.0842
same_same	Ern1	ENSMUSG00000020715	-0.296704	3.73e-08	-0.271953	4.73e-08	81.4409	81.6836	77.9146	65.5999	64.9617	65.7922	65.7035	65.4782	68.5158	75.066	65.4513	66.5658	207.083
same_same	Spdl1	ENSMUSG00000069910	-0.358579	3.73e-08	-0.714555	2.45e-15	44.6312	43.2191	47.9363	34.0336	36.6472	35.1236	27.5593	27.3862	27.6457	41.7297	35.2681	27.5304	104.528
same_same	Nr2c2	ENSMUSG00000005893	-0.249206	3.8e-08	-0.269092	2.05e-09	103.333	108.112	105.914	90.7041	86.984	89.1711	88.2932	85.5775	89.3191	101.577	88.9531	87.7299	278.26
up_same	Gna15	ENSMUSG00000034792	0.781512	3.8e-08	0.940946	9.92e-11	4.63649	4.32619	4.29641	7.44118	8.24775	7.21616	8.35816	8.59919	8.56064	5.35459	7.63503	8.506	21.4956
up_same	Ifi202b	ENSMUSG00000026535	0.609632	3.83e-08	0.439235	4.6e-06	19.5539	20.4316	18.5856	28.0023	33.2461	28.5333	25.9781	26.3156	27.2161	22.3398	29.9272	26.5033	78.7703
up_same	Errfi1	ENSMUSG00000028967	0.642449	3.83e-08	0.668514	3.11e-09	9.11171	9.89455	9.70312	15.274	15.05	14.4691	14.7801	15.0572	15.7099	11.6239	14.9311	15.1824	41.7373
up_same	Clec4n	ENSMUSG00000023349	0.589834	3.86e-08	0.638987	1.75e-09	59.8309	52.5996	47.9846	82.8321	79.6716	79.93	86.4214	85.8883	78.7334	61.1388	80.8112	83.681	225.631
same_same	Slc25a37	ENSMUSG00000034248	-0.257968	3.89e-08	0.00204793	0.960344	137.401	145.591	138.692	119.294	116.404	116.931	141.379	140.005	140.898	134.526	117.543	140.76	392.829
up_up	Ceacam1	ENSMUSG00000074272	0.593386	3.89e-08	1.10072	1.19e-15	10.0793	11.5222	9.51002	16.2139	16.0278	14.8741	22.5251	21.4807	22.8284	12.4154	15.7053	22.2781	50.3988
same_same	Camkk2	ENSMUSG00000029471	-0.243769	3.93e-08	-0.224979	5.34e-08	138.651	144.863	143.519	123.21	115.256	121.865	121.145	123.428	120.739	137.198	120.11	121.77	379.078
up_up	Ehd2	ENSMUSG00000074364	0.595449	3.93e-08	1.46348	3.53e-19	8.66822	8.22405	8.64109	13.5508	12.7117	12.3337	23.0737	24.5889	22.8284	10.1386	12.8654	23.497	46.501
same_same	Atp1a3	ENSMUSG00000040907	-0.248283	4.01e-08	-0.525795	4.9e-16	183.282	187.611	183.49	155.991	153.306	157.356	129.729	125.88	129.392	175.697	155.551	128.333	459.582
same_same	Ppp1r9b	ENSMUSG00000038976	0.22797	4.1e-08	0.0783348	0.0146156	110.227	107.298	110.693	129.398	130.646	124.479	113.013	114.449	118.929	115.796	128.174	115.463	359.434
same_same	Rnpep	ENSMUSG00000041926	-0.23534	4.11e-08	0.0593899	0.0609156	87.166	90.5073	91.5762	77.5841	74.0172	76.8374	91.3912	93.7623	95.1796	86.5559	76.1462	93.4444	256.146
same_same	Rad54l2	ENSMUSG00000040661	0.252593	4.11e-08	0.250869	1.26e-08	73.7807	74.4447	70.3838	89.0983	83.9655	87.4775	84.1947	87.9604	88.2145	77.9756	86.8471	86.7899	251.613
same_same	Acsl1	ENSMUSG00000018796	-0.312203	4.17e-08	-0.323146	5.93e-09	128.048	130.685	128.603	100.534	104.415	106.954	100.943	103.225	105.397	119.941	103.968	103.188	327.097
same_same	Eif2b3	ENSMUSG00000028683	0.393992	4.17e-08	0.284885	4.18e-06	25.6418	24.4151	25.4888	32.8195	33.1186	33.3195	31.3673	30.1835	30.4685	27.5745	33.0859	30.6731	91.3335
same_same	Trps1	ENSMUSG00000038679	-0.426817	4.18e-08	-0.144544	0.0126353	86.5209	95.0477	95.0037	75.5476	64.9617	64.9454	84.0657	83.091	82.7529	88.533	68.4849	83.3032	240.321
same_same	Gdpd1	ENSMUSG00000061666	-0.263307	4.33e-08	-0.530591	1.85e-15	94.3425	93.0345	87.2798	78.0541	76.1854	74.9229	62.1215	63.4752	64.7418	86.1228	76.3875	63.4461	225.956
same_same	Fyb	ENSMUSG00000022148	-0.297384	4.33e-08	-0.246678	3.65e-07	83.1746	84.8533	83.6592	65.5999	69.4682	69.7317	68.027	74.4918	69.7432	78.0375	68.2666	70.754	217.058
same_same	Rps6ka3	ENSMUSG00000031309	0.258027	4.4e-08	0.286144	1.56e-09	120.912	127.558	124.596	147.061	155.007	144.213	152.06	150.71	152.005	133.072	148.76	151.592	433.424
same_same	Stk38	ENSMUSG00000024006	-0.25157	4.54e-08	-0.267242	3.45e-09	96.7212	97.7462	96.9829	83.537	78.6087	82.5072	80.29	80.121	81.7097	92.7554	81.551	80.7069	255.013
same_same	Mtmr3	ENSMUSG00000034354	-0.25208	4.56e-08	-0.194902	1.29e-06	93.6974	95.3904	100.121	81.3439	77.6734	83.354	82.678	85.8883	83.8882	92.285	80.7904	84.1515	257.227
same_same	Amotl1	ENSMUSG00000013076	-0.214932	4.57e-08	-0.0886215	0.00372833	181.589	185.898	179.194	158.027	151.988	160.891	169.68	172.26	172.256	174.373	156.969	171.399	502.741
same_same	Nop58	ENSMUSG00000026020	0.23385	4.6e-08	0.113906	0.000892126	172.155	171.42	162.781	192.57	202.155	201.058	183.492	183.07	181.676	175.59	198.594	182.746	556.931
same_same	Rbl2	ENSMUSG00000031666	-0.430919	4.6e-08	-0.290763	8.38e-06	36.6484	40.4349	38.6677	28.1982	29.4623	28.2019	33.0454	30.3907	31.0822	35.7669	28.6208	31.5061	95.8938
same_same	Slc5a3	ENSMUSG00000089774	-0.346826	4.61e-08	-0.0453416	0.350514	129.862	135.354	127.83	112.714	99.7808	96.7186	128.89	121.908	130.036	125.3	103.071	126.945	355.315
up_down	Bhlhe40	ENSMUSG00000030103	0.612112	4.71e-08	0.00458943	0.965684	95.7536	94.2767	85.8316	141.03	147.312	134.419	90.2617	94.4875	92.5409	107.046	140.92	92.43	340.396
same_same	Yrdc	ENSMUSG00000028889	0.359735	4.74e-08	0.291694	6.62e-07	39.4303	37.0939	37.5091	47.5844	50.2518	48.7091	44.3079	46.5876	48.7558	40.7291	48.8484	46.5504	136.128
same_same	Gab2	ENSMUSG00000004508	-0.278984	4.79e-08	-0.415476	2.42e-12	67.9346	67.4629	66.5219	54.9081	55.3535	56.183	50.1812	50.2138	51.0263	62.9643	55.4815	50.4738	168.92
same_same	Dock4	ENSMUSG00000035954	-0.272482	4.81e-08	-0.189705	8.19e-06	153.367	153.13	151.726	130.064	127.33	122.122	130.633	136.102	135.099	144.973	126.505	133.944	405.423
up_same	Ier2	ENSMUSG00000053560	0.531265	4.81e-08	0.484662	7.51e-08	30.6815	26.0856	28.0956	39.8691	42.2591	40.7934	36.8534	40.6131	41.4532	31.3501	40.9739	39.6399	111.964
same_same	Notch2	ENSMUSG00000027878	-0.28838	4.95e-08	-0.259908	1.35e-07	311.451	322.837	312.769	266.668	254.915	253.891	258.651	267.197	265.104	300.758	258.491	263.651	822.9
same_same	Arhgap30	ENSMUSG00000048865	0.212107	5.13e-08	0.218784	9.46e-09	185.742	193.479	179.822	213.562	216.227	217.994	215.666	213.184	221.871	195.621	215.928	216.907	628.456
same_same	Tiam1	ENSMUSG00000002489	0.430644	5.2e-08	0.0030523	0.967557	25.0774	25.8715	26.2129	34.1511	34.7341	35.0131	25.3004	26.73	25.283	28.7452	34.6328	25.7711	89.1491
same_same	Hpse	ENSMUSG00000035273	-0.410215	5.44e-08	-0.894879	6.34e-16	34.31	31.2685	31.7644	23.8118	25.1684	24.4098	16.9422	18.5107	17.0292	28.9482	24.4633	17.4941	70.9056
same_same	Eif2s2	ENSMUSG00000074656	0.285395	5.51e-08	0.119388	0.00394644	105.188	105.199	111.658	124.229	137.661	130.48	120.145	115.519	113.896	113.695	130.79	116.52	361.005
same_same	Dnmt1	ENSMUSG00000004099	-0.209702	5.62e-08	-0.491906	6.17e-17	339.955	340.955	325.706	292.634	287.736	290.23	245.226	234.527	236.169	319.765	290.2	238.641	848.606
same_same	D5Ertd579e	ENSMUSG00000029190	0.267736	5.76e-08	0.063711	0.0959204	52.8157	51.4431	52.6672	65.9915	60.5827	62.2578	53.2147	55.8084	55.0152	56.7006	62.944	54.6794	174.324
same_same	Ldlrad3	ENSMUSG00000048058	-0.322207	5.8e-08	0.0594244	0.183189	129.822	136.682	134.878	108.054	106.498	106.365	139.991	129.437	148.292	126.538	106.972	139.24	372.75
same_same	Zmiz2	ENSMUSG00000041164	-0.252172	5.87e-08	-0.402276	7.64e-13	274.561	285.486	281.873	238.705	225.92	241.962	210.697	213.219	213.065	268.688	235.529	212.327	716.544
down_down	Cxcr4	ENSMUSG00000045382	-1.05562	5.88e-08	-2.05707	7.18e-14	6.93457	7.28171	5.69636	3.13313	4.03885	2.54038	1.71036	1.485	1.59553	5.3704	3.23745	1.59696	10.2048
same_same	Pold1	ENSMUSG00000038644	-0.288261	6.21e-08	-0.417201	6.5e-12	84.0616	92.0922	86.073	72.4144	69.8083	72.3825	67.5752	66.6178	62.2871	83.5265	71.5351	65.4934	220.555
same_same	Clic1	ENSMUSG00000007041	0.275991	6.22e-08	0.500881	3.64e-14	446.272	428.85	410.765	519.042	518.886	519.306	593.526	610.577	615.814	452.886	519.078	606.639	1578.6
same_same	Tsc1	ENSMUSG00000026812	-0.288838	6.37e-08	-0.422696	4.92e-12	49.7515	47.2883	46.4398	38.185	40.2609	39.2103	36.3047	35.3292	35.5313	43.971	39.2187	35.7217	118.912
same_same	Zcchc14	ENSMUSG00000061410	-0.265693	6.42e-08	-0.239485	1.16e-07	82.973	82.9686	85.3971	71.3962	66.5772	70.7994	71.2541	69.795	71.6762	79.9206	69.5909	70.9085	220.42
same_same	Fancd2	ENSMUSG00000034023	-0.28412	6.86e-08	-0.528807	2.15e-14	76.8448	86.481	82.0179	67.1273	67.1299	67.0808	56.1513	57.7424	56.0891	78.5421	67.1127	56.6609	202.316
same_same	Fam126b	ENSMUSG00000038174	-0.300557	7.14e-08	-0.48365	6.77e-13	61.6048	64.5074	66.184	51.2658	52.7601	51.949	47.4705	45.3443	44.5522	60.6524	51.9916	45.789	158.433
same_same	Psmd11	ENSMUSG00000017428	0.235035	7.24e-08	0.198423	5.61e-07	124.419	122.29	118.368	143.38	137.703	148.594	140.411	140.35	138.412	128.013	143.226	139.724	410.963
same_same	Sh2b3	ENSMUSG00000042594	0.32911	7.32e-08	0.0136795	0.796262	176.066	175.104	176.491	226.799	224.007	212.214	173.262	180.618	178.822	192.798	221.007	177.567	591.372
same_same	Cars	ENSMUSG00000010755	0.29833	7.32e-08	-0.0155736	0.743717	74.3854	70.5041	73.4251	88.9025	93.1061	86.7044	74.0617	69.8987	71.9524	77.6106	89.571	71.9709	239.152
up_same	Zfpm1	ENSMUSG00000049577	0.544833	7.32e-08	0.310706	0.000208821	23.9082	25.8715	26.0681	38.655	36.3496	35.4917	31.8836	30.218	31.7572	30.1982	36.8321	31.2863	98.3166
same_same	Abcc1	ENSMUSG00000023088	0.21645	7.62e-08	0.289741	6.59e-11	459.778	470.655	458.316	534.081	535.126	544.341	549.218	579.979	568.5	487.684	537.849	565.899	1591.43
same_same	Dpp7	ENSMUSG00000026958	-0.343591	7.64e-08	-0.547582	9.8e-13	66.7251	66.8632	65.4116	50.1692	51.5697	55.0048	43.6625	48.487	44.2146	60.8147	52.2479	45.4547	158.517
same_same	AI467606	ENSMUSG00000045165	0.337877	7.72e-08	0.226038	2.21e-05	32.7376	31.911	30.2679	38.89	40.8136	40.4989	36.4984	36.089	38.5382	33.6896	40.0675	37.0419	110.799
same_same	Morf4l2	ENSMUSG00000031422	0.224855	7.82e-08	0.163734	7.26e-06	164.051	159.212	164.712	190.612	196.288	183.533	186.848	176.957	182.688	171.512	190.144	182.165	543.821
same_same	Gins3	ENSMUSG00000031669	-0.419392	8e-08	-0.553258	6.91e-11	40.9624	36.4514	37.9918	29.1381	30.3976	27.0238	27.5593	25.2796	25.866	34.5271	28.8532	26.235	89.6152
same_same	Slc27a1	ENSMUSG00000031808	-0.27722	8.04e-08	-0.477652	1.85e-13	269.844	267.453	259.088	214.933	218.353	223.959	184.493	202.685	185.082	247.158	219.081	190.753	656.992
same_same	Vps13c	ENSMUSG00000035284	-0.248961	8.06e-08	-0.338251	5.03e-11	488.928	505.265	501.473	425.322	417.787	415.445	407.291	383.855	391.826	477.353	419.518	394.324	1291.2
same_same	Adrb2	ENSMUSG00000045730	0.385316	8.06e-08	0.55073	5.88e-12	30.6411	31.911	29.2542	40.574	40.1334	39.3943	45.5988	45.6206	43.5089	33.9131	40.0339	44.9094	118.856
same_same	Npc1	ENSMUSG00000024413	-0.28213	8.08e-08	-0.581263	2.54e-15	111.477	112.824	113.782	96.187	88.5145	93.0737	78.1278	71.1764	76.4321	107.598	92.5918	75.2455	275.435
same_same	Timeless	ENSMUSG00000039994	-0.325617	8.08e-08	-0.546579	3.2e-13	57.0893	59.1532	56.1912	44.6471	44.2148	48.5986	40.4354	38.8172	38.8451	53.3305	45.8202	39.3659	138.517
same_same	Kcnk13	ENSMUSG00000045404	0.35915	8.11e-08	0.307888	3.94e-07	28.8672	28.4415	30.6541	38.4983	37.1149	37.038	35.2721	37.8848	35.654	32.5313	37.5504	36.2703	106.352
down_same	Ttc39a	ENSMUSG00000028555	-0.675803	8.22e-08	-0.748283	2.44e-09	8.95044	9.59472	9.07556	5.48298	6.07953	5.74347	5.35697	5.52559	5.55368	8.05108	5.76866	5.47874	19.2985
same_same	Insig1	ENSMUSG00000045294	-0.255488	8.37e-08	-0.436072	2.29e-13	164.656	161.611	169.443	134.842	134.175	145.833	120.79	122.115	123.347	155.299	138.283	122.084	415.666
same_same	Eif4a1	ENSMUSG00000059796	0.221681	8.7e-08	0.121053	0.000390186	619.717	598.428	582.236	677.657	700.889	720.99	646.547	656.025	655.549	619.44	699.845	652.707	1971.99
same_same	Brca1	ENSMUSG00000017146	-0.258031	8.7e-08	-0.534212	2.42e-15	86.9644	84.0395	86.8453	72.6886	71.7214	71.2044	59.9593	60.6088	57.5619	81.1911	71.8715	59.3767	212.439
same_same	Prrc2b	ENSMUSG00000039262	-0.228804	9.02e-08	-0.228153	3.31e-08	224.527	236.313	230.847	201.578	189.953	198.481	195.465	197.402	197.57	222.913	196.671	196.812	616.395
same_same	Tor3a	ENSMUSG00000060519	-0.231089	9.14e-08	-0.664785	7.97e-19	141.715	142.636	139.802	121.683	117.424	122.196	90.0358	86.8553	90.6078	134.707	120.434	89.1663	344.308
same_same	Pip5k1a	ENSMUSG00000028126	0.211313	9.31e-08	0.142676	2.42e-05	106.196	104.728	105.431	120.116	126.607	119.729	116.756	116.659	115.86	110.092	122.151	116.425	348.668
same_same	Cdk17	ENSMUSG00000020015	0.293395	9.31e-08	0.236739	1.33e-06	43.0992	42.9192	45.7157	55.6914	53.5679	52.0226	51.0525	52.2513	51.7321	48.1088	53.7606	51.6786	153.548
same_same	Mob3a	ENSMUSG00000003348	0.304739	9.79e-08	0.471032	1.17e-12	42.0509	39.1499	39.3918	48.0935	48.8913	52.0226	56.5063	55.0486	55.7823	42.2117	49.6692	55.7791	147.66
same_same	Bcl2l11	ENSMUSG00000027381	0.321684	1.04e-07	0.0450718	0.358287	42.9379	42.6194	43.0606	51.6966	55.481	53.6426	42.4362	45.5515	44.7363	45.7922	53.6067	44.2413	143.64
down_same	Per3	ENSMUSG00000028957	-0.661176	1.06e-07	-1.11241	8.12e-13	9.83742	11.3937	11.6341	6.6579	7.14238	6.92162	5.16334	5.07663	4.90933	9.89524	6.9073	5.04977	21.8523
same_same	Hspa5	ENSMUSG00000026864	0.255742	1.09e-07	-0.0289462	0.465619	1499.72	1503.46	1516.2	1796.07	1867.31	1732.61	1517.18	1450.6	1461.78	1605.24	1798.66	1476.52	4880.43
same_same	Nrros	ENSMUSG00000052384	0.247528	1.1e-07	0.0312082	0.410811	153.125	163.967	159.933	187.479	187.955	190.639	160.419	167.805	159.216	170.459	188.691	162.48	521.63
same_same	Tsr1	ENSMUSG00000038335	0.194052	1.1e-07	0.118008	0.000110333	108.776	105.97	109.196	123.641	123.291	123.595	116.982	115.278	119.174	112.936	123.509	117.144	353.589
same_same	Gpr132	ENSMUSG00000021298	-0.479999	1.1e-07	-0.512734	6.85e-09	25.8434	27.6277	27.5163	18.6813	19.0038	20.2494	18.8462	18.6834	19.1464	24.6084	19.3115	18.892	62.8119
same_same	Gm49759	ENSMUSG00000111394	0.27792	1.11e-07	0.416737	5.18e-12	132.805	138.395	131.016	168.758	160.916	158.166	179.458	181.412	176.276	146.057	162.614	179.049	487.719
same_same	Stk17b	ENSMUSG00000026094	0.344052	1.11e-07	0.531369	1.7e-12	59.6696	65.1927	68.1632	81.9705	85.6236	77.1687	92.4561	92.6572	93.2159	71.7755	81.5876	92.7764	246.139
same_same	Espl1	ENSMUSG00000058290	-0.272104	1.11e-07	-0.414614	4.17e-12	83.5374	83.3113	83.1282	72.4928	65.7269	68.664	62.8314	63.5788	61.2132	79.6441	68.9612	62.5411	211.146
down_same	Ppargc1b	ENSMUSG00000033871	-0.530884	1.11e-07	-0.488883	1.12e-07	32.3345	32.5963	32.923	23.3418	20.1942	23.968	23.3641	24.727	21.7238	29.6204	22.5013	23.2716	75.3934
same_same	Creb3	ENSMUSG00000028466	0.350009	1.13e-07	0.369273	9.1e-09	37.3741	35.509	34.0816	45.4304	44.4273	46.6473	47.0832	46.0005	45.3806	38.3403	45.5017	46.1548	129.997
down_same	Aph1c	ENSMUSG00000053040	-0.995741	1.14e-07	-1.38206	6.58e-11	9.03107	9.59472	8.73764	4.50387	4.25142	4.9335	3.84024	3.14268	3.4979	7.61208	4.56293	3.4936	15.6686
same_same	Ppip5k1	ENSMUSG00000033526	-0.276947	1.19e-07	-0.328057	1.01e-09	62.129	61.3377	63.5772	52.4016	50.0817	51.7281	50.8589	48.0035	49.9831	59.1055	51.4038	49.6152	160.124
down_same	Gm38248	ENSMUSG00000104164	-0.701059	1.21e-07	-0.775439	3.99e-09	24.8758	24.8435	23.3647	16.8406	13.6045	14.506	14.6833	15.8515	12.3654	21.6829	14.9837	14.3001	50.9667
down_same	Tifa	ENSMUSG00000046688	-0.634908	1.22e-07	-0.292009	0.00128349	16.4898	15.6343	16.7512	10.731	10.3735	10.3456	12.9406	11.9836	14.8507	14.3721	10.4833	13.2583	38.1138
same_same	Id1	ENSMUSG00000042745	0.430632	1.28e-07	0.882361	9.16e-16	37.3338	34.8665	36.0126	49.0726	48.9763	47.9359	63.7995	68.241	67.5953	39.9839	48.6616	66.5453	155.191
down_same	Lpar5	ENSMUSG00000067714	-0.596872	1.28e-07	-0.694909	1.54e-09	14.232	14.0066	15.0133	9.79103	8.63038	10.0511	9.29402	8.53012	8.83679	12.937	9.49083	8.88698	31.3148
same_same	Uap1l1	ENSMUSG00000026956	-0.273468	1.29e-07	-0.673998	7.07e-17	77.2479	76.2009	77.7698	60.8219	65.812	64.6877	49.4067	47.8654	47.6205	71.5975	63.7738	48.2975	183.669
same_same	Grn	ENSMUSG00000034708	-0.185267	1.3e-07	-0.651494	6.9e-21	378.055	385.288	370.794	330.036	330.25	337.208	247.13	240.259	234.727	362.039	332.498	240.706	935.243
same_same	Ranbp10	ENSMUSG00000037415	-0.259446	1.3e-07	-0.213125	1.17e-06	89.8673	89.1367	83.9972	73.6677	72.6567	73.5975	77.2565	73.3867	76.4014	82.2672	73.3073	75.6815	231.256
same_same	Lrp1	ENSMUSG00000040249	-0.233401	1.32e-07	-0.484706	4.07e-15	2311.91	2396.41	2368.38	2045.19	1974.78	1999.61	1667.82	1716.42	1673.07	2269.99	2006.53	1685.77	5962.29
same_same	Repin1	ENSMUSG00000052751	-0.433365	1.32e-07	-0.379469	3.14e-07	26.69	25.3146	28.1439	20.4828	18.8338	19.8813	21.1374	20.6519	19.7601	24.6471	19.7326	20.5165	64.8962
same_same	Mtss1	ENSMUSG00000022353	-0.260574	1.33e-07	-0.521604	9.49e-15	117.283	130.771	127.734	106.252	104.797	102.425	87.3573	88.0985	86.128	121.586	104.492	87.1946	313.272
same_same	Dennd4c	ENSMUSG00000038024	-0.247049	1.33e-07	-0.440502	1.4e-13	115.832	120.277	114.313	98.3411	97.315	99.6272	88.0027	85.7847	84.5325	110.977	98.4277	86.1066	295.511
same_same	Map3k1	ENSMUSG00000021754	-0.293918	1.34e-07	-0.168213	0.000189004	65.435	71.4036	67.4391	55.4172	57.9043	53.4585	61.347	59.6418	60.7223	64.7533	55.5933	60.5703	180.917
same_same	Tbc1d2b	ENSMUSG00000037410	-0.373212	1.38e-07	-0.392393	1.29e-08	56.4845	53.542	55.3705	43.198	39.5807	44.696	41.4358	40.4058	44.0612	50.7035	42.4916	41.9676	135.163
up_same	Tns2	ENSMUSG00000037003	0.541734	1.38e-07	0.330823	0.000134362	17.1752	18.4613	17.2822	26.9841	26.4013	23.7839	21.8797	22.6894	22.0306	20.9092	25.7231	22.1999	68.8322
same_same	Irf2	ENSMUSG00000031627	0.284324	1.4e-07	0.268063	1.19e-07	57.6134	58.5535	58.4118	72.4928	74.1873	66.1972	68.6079	70.762	70.8171	63.1527	70.9591	70.0623	204.174
same_same	Pik3r2	ENSMUSG00000031834	-0.310401	1.46e-07	-0.355635	2.44e-09	46.4455	46.3888	45.8605	36.3443	37.8801	37.6639	36.3047	34.673	37.3416	42.8645	37.2961	36.1065	116.267
same_same	Bcl7a	ENSMUSG00000029438	-0.373417	1.5e-07	-0.639929	4.8e-13	36.2452	37.1795	38.0401	28.159	29.7174	28.1651	25.1713	23.3801	22.9204	34.4595	28.6805	23.824	86.964
same_up	Slc15a3	ENSMUSG00000024737	0.280984	1.51e-07	0.843401	1.66e-19	78.9413	78.0428	77.2388	96.6962	92.3833	95.5037	136.99	143.423	140.008	83.9926	94.8611	140.14	318.994
down_same	Kmt5c	ENSMUSG00000059851	-0.503478	1.55e-07	-0.289419	0.000155655	19.9167	22.1878	22.6889	15.1565	15.3901	15.0582	17.394	18.7179	16.8451	20.0111	15.2016	17.6524	52.865
same_same	Hivep2	ENSMUSG00000015501	0.315464	1.63e-07	0.046906	0.339988	37.5354	39.9209	38.7159	48.211	49.1464	47.2364	39.8223	39.3353	40.7474	42.2826	48.1979	39.9683	130.449
same_same	Rilpl2	ENSMUSG00000029401	-0.339404	1.63e-07	-0.593566	3.16e-13	36.7694	35.8945	34.5644	27.924	27.2516	29.5642	24.6872	22.8621	23.5648	32.7943	28.2466	23.7047	84.7456
same_same	Usp47	ENSMUSG00000059263	0.220102	1.65e-07	0.175917	3e-06	121.153	117.492	118.562	137.153	145.739	133.536	134.408	134.306	134.884	124.402	138.809	134.533	397.744
same_same	Vim	ENSMUSG00000026728	0.194257	1.66e-07	0.0823707	0.00594243	2575.03	2515.7	2557.28	2802.39	2965.15	2982.81	2649.05	2730.74	2717.59	2625.12	2916.78	2699.13	8241.04
same_same	Arhgef7	ENSMUSG00000031511	0.283452	1.66e-07	0.322505	5.42e-09	1053.17	1054.65	1046.25	1319.32	1263.99	1255.54	1285.38	1331.91	1326.9	1140.07	1279.62	1314.73	3734.42
same_same	Cdc42ep3	ENSMUSG00000036533	0.308472	1.66e-07	0.356953	2.05e-09	46.9696	45.8319	48.226	57.8454	58.3295	58.3552	59.2494	59.5382	61.6428	50.6344	58.1767	60.1434	168.955
same_same	Mical2	ENSMUSG00000038244	0.329764	1.76e-07	0.496841	5.38e-12	58.0569	56.9258	57.2532	70.7695	74.5699	71.3148	78.3214	80.3973	84.2871	61.6495	72.2181	81.0019	214.87
same_same	Arhgef10l	ENSMUSG00000040964	0.239602	1.78e-07	0.107692	0.00356824	110.308	109.226	108.279	131.278	128.69	127.203	114.884	119.456	118.99	116.261	129.057	117.777	363.095
up_same	Gm28875	ENSMUSG00000100975	0.502182	1.78e-07	0.466659	1.96e-07	23.5453	24.201	24.4268	31.8404	36.052	34.3504	33.0777	34.8803	31.8186	26.8227	34.0809	33.2588	94.1625
same_same	Atm	ENSMUSG00000034218	-0.258667	1.81e-07	-0.341273	1.82e-10	83.0133	81.6408	82.4041	67.9497	67.0874	71.3148	67.1234	63.1643	64.6804	77.3315	68.784	64.9894	211.105
same_same	Ubn1	ENSMUSG00000039473	-0.223923	1.83e-07	-0.264248	1.96e-09	107.204	105.156	104.465	92.3098	90.3001	88.8029	87.6477	90.4815	85.8826	100.644	90.471	88.0039	279.119
down_same	Ypel2	ENSMUSG00000018427	-1.24652	1.83e-07	-0.986476	1.17e-06	3.78983	4.45469	3.91021	1.91904	1.36045	1.80404	2.42032	1.86489	1.841	3.42798	1.69451	2.04207	7.16456
same_same	Oxsr1	ENSMUSG00000036737	0.214115	1.85e-07	0.227121	1.74e-08	95.552	96.1185	93.6037	110.012	115.043	106.254	110.528	113.654	109.938	99.9114	110.437	111.373	321.721
same_same	Fkbp15	ENSMUSG00000066151	-0.191961	1.86e-07	-0.179516	2.04e-07	136.837	144.392	137.775	122.584	122.228	122.012	123.468	122.668	123.838	134.917	122.275	123.325	380.516
same_same	Zfp608	ENSMUSG00000052713	0.367278	1.89e-07	0.789049	4.38e-16	33.2618	31.5683	29.5438	41.5923	41.3238	39.2471	52.4402	54.6688	56.3652	34.2348	40.721	54.4914	129.447
same_same	Dvl2	ENSMUSG00000020888	-0.393462	1.89e-07	-0.494974	5.08e-10	36.971	35.2949	34.5161	28.4723	26.4863	26.4347	25.139	25.4868	25.2524	32.7611	27.1311	25.2927	85.1849
same_same	Slc48a1	ENSMUSG00000081534	0.227575	1.97e-07	0.148878	7.02e-05	230.655	227.618	216.848	261.655	257.678	271.306	245.162	253.624	250.069	235.374	263.546	249.618	748.539
same_same	Ankrd28	ENSMUSG00000014496	0.311392	1.97e-07	-0.0682406	0.156974	144.457	141.222	142.457	175.22	192.377	164.241	133.472	143.734	131.386	152.967	177.279	136.198	466.444
same_down	Pnpla7	ENSMUSG00000036833	-0.459465	2.05e-07	-0.971807	8.72e-15	31.3669	36.6227	36.2539	26.3183	24.9558	24.3729	18.588	17.5092	16.9372	33.065	25.2157	17.6781	75.9588
same_same	Znrf2	ENSMUSG00000058446	-0.190901	2.08e-07	-0.192535	5.64e-08	146.553	153.815	149.36	130.769	132.177	131.032	131.988	127.71	133.687	144.648	131.326	131.128	407.103
same_same	Spaca6	ENSMUSG00000080316	0.394236	2.09e-07	0.564388	1.59e-11	21.6101	23.0445	22.6889	30.1955	29.6749	28.6069	34.1103	34.5004	31.0208	25.3096	29.4924	33.2105	88.0126
down_same	Tfap4	ENSMUSG00000005718	-0.511644	2.09e-07	-0.501056	6.89e-08	18.7072	18.5041	19.6476	12.2975	13.6471	13.8801	13.7474	13.814	12.6108	16.8164	13.2749	13.3907	43.482
same_same	Lamc1	ENSMUSG00000026478	0.271354	2.16e-07	-0.0100653	0.827793	316.128	318.725	307.893	372.842	384.711	380.432	308.542	316.271	311.497	333.153	379.328	312.103	1024.58
up_same	Socs3	ENSMUSG00000053113	0.671222	2.16e-07	0.992127	9.29e-12	33.544	34.5667	32.1989	55.0647	56.6714	48.4514	62.4442	67.4467	69.8045	40.6101	53.3958	66.5651	160.571
same_same	Mindy2	ENSMUSG00000042444	-0.275025	2.22e-07	-0.362089	2.64e-10	125.629	139.38	138.74	111.892	113.768	107.837	107.817	100.738	105.121	130.004	111.166	104.559	345.729
same_same	Cflar	ENSMUSG00000026031	-0.275734	2.25e-07	-0.123182	0.0039412	179.896	179.858	172.822	151.996	144.888	143.182	160.483	166.009	162.683	168.225	146.689	163.058	477.972
same_same	Arhgef2	ENSMUSG00000028059	0.206288	2.34e-07	0.181138	9.71e-07	298.791	295.08	286.99	339.592	340.454	336.398	328.969	339.685	330.244	307.221	338.815	332.966	979.002
same_same	Spryd7	ENSMUSG00000021930	0.293206	2.35e-07	0.132682	0.00387062	68.3378	72.3031	74.2458	87.6101	93.9138	81.8445	76.7724	79.3612	79.1936	78.053	87.7895	78.4424	244.285
same_same	Tnfaip8	ENSMUSG00000062210	0.26533	2.43e-07	0.438627	9.5e-13	64.0239	63.9505	69.2252	76.2917	79.7566	80.5927	90.2294	89.1001	87.5702	69.8225	78.8803	88.9665	237.669
same_same	Igf2r	ENSMUSG00000023830	-0.226427	2.56e-07	-0.56908	8.62e-17	312.983	308.873	312.189	270.976	260.569	266.74	214.698	203.825	210.978	297.346	266.095	209.834	773.276
same_same	Tpm1	ENSMUSG00000032366	0.255276	2.59e-07	0.100374	0.0116769	134.095	124.731	123.63	152.818	154.964	149.22	135.538	138.761	136.111	133.727	152.334	136.803	422.864
same_same	Plekhm3	ENSMUSG00000051344	-0.224037	2.64e-07	-0.106677	0.00249986	222.955	223.634	213.517	193.588	190.251	181.619	200.08	210.594	202.663	210.246	188.486	204.446	603.178
same_same	Kif5a	ENSMUSG00000074657	-0.209483	2.71e-07	-0.135089	7.8e-05	97.6888	97.7462	93.1693	83.9287	83.0302	82.8386	88.2932	89.7908	85.0541	91.6147	83.2658	87.7127	262.593
same_same	Slc35e3	ENSMUSG00000060181	-0.425088	2.71e-07	-0.420325	7.59e-08	26.6094	25.8286	27.5646	19.3471	19.2589	20.8385	19.8143	20.0648	19.8521	24.2468	19.8148	19.9104	63.972
same_same	Pla1a	ENSMUSG00000002847	0.366862	2.72e-07	0.5581	5.02e-12	22.6986	20.0033	20.4683	26.5924	27.7618	27.3183	30.0765	31.8412	31.3277	22.3547	27.2242	31.0818	80.6606
same_same	Nbr1	ENSMUSG00000017119	-0.238219	2.73e-07	-0.0991695	0.00634915	82.4892	78.8566	79.4594	66.109	68.5329	69.5844	74.4167	75.7005	74.8366	74.8083	68.0754	74.9846	217.868
down_up	Maml3	ENSMUSG00000061143	-0.59945	2.73e-07	0.358852	3.94e-05	12.1758	13.4497	12.9858	8.10697	7.95015	9.31474	16.2323	17.1984	16.0781	11.5142	8.45729	16.5029	36.4743
same_same	N4bp1	ENSMUSG00000031652	-0.235157	2.75e-07	-0.0678876	0.0563015	104.785	108.112	107.024	95.4038	87.5792	88.6925	102.428	103.363	99.4446	103.513	90.5585	101.745	295.817
same_same	Cast	ENSMUSG00000021585	0.216067	2.79e-07	0.204654	2.34e-07	86.2387	84.2536	85.735	98.4194	102.459	96.9395	99.233	100.048	96.1001	89.4694	99.2727	98.4602	287.202
same_same	Slc7a8	ENSMUSG00000022180	-0.237674	2.79e-07	-0.319687	2.03e-10	89.5044	90.2075	85.4937	76.2134	73.1669	75.6224	68.1561	73.5939	71.0012	83.9715	75.0009	70.9171	229.889
same_same	Slc11a2	ENSMUSG00000023030	-0.232641	2.79e-07	-0.235802	6.15e-08	81.9247	79.0279	77.7698	66.4223	65.7269	70.9834	66.8653	68.3791	67.6567	74.4067	67.7109	67.6337	209.751
same_down	Plxdc1	ENSMUSG00000017417	-0.32534	2.79e-07	-1.09474	1.87e-19	62.7337	61.8088	62.1289	52.7932	47.7859	48.3777	29.0761	28.3186	29.9469	58.9103	49.6523	29.1139	137.676
same_same	Zxdc	ENSMUSG00000034430	-0.287871	2.87e-07	-0.324073	7.18e-09	45.8004	45.2751	45.9571	38.5375	37.0724	36.6331	36.4338	36.3998	36.6052	43.2565	37.4143	36.4796	117.15
same_same	Prex1	ENSMUSG00000039621	-0.262606	2.98e-07	-0.203992	5.95e-06	89.5447	91.4068	88.4867	76.8791	73.0394	74.6652	77.2888	79.3612	77.3833	85.5909	74.8612	78.0111	238.463
same_same	Chchd4	ENSMUSG00000034203	0.249301	3.06e-07	0.172715	4.03e-05	91.0768	91.107	86.8936	104.098	103.862	111.887	103.912	99.2188	100.365	94.0329	106.616	101.165	301.814
same_same	Map4k5	ENSMUSG00000034761	0.274666	3.06e-07	0.236801	1.2e-06	36.8097	36.3229	36.0126	43.1588	45.3626	43.6651	44.3725	42.2362	42.0668	38.4981	44.0622	42.8918	125.452
same_same	Peak1	ENSMUSG00000074305	0.24521	3.19e-07	0.377856	1.54e-11	405.632	410.346	398.938	481.64	488.743	469.75	512.365	533.357	533.03	430.308	480.044	526.251	1436.6
same_same	Cenpc1	ENSMUSG00000029253	0.28674	3.19e-07	0.101768	0.0235608	61.2017	63.7792	60.6324	74.7251	78.056	73.892	66.8653	67.3085	65.1407	66.3789	75.5577	66.4382	208.375
same_same	Dennd3	ENSMUSG00000036661	0.401452	3.23e-07	0.3657	4.99e-07	29.1897	29.7265	28.0473	39.6732	39.4957	35.9703	37.9506	36.3653	37.8018	32.4824	38.3798	37.3726	108.235
same_same	Sik3	ENSMUSG00000034135	0.271325	3.26e-07	0.43512	3.58e-12	79.4251	80.8269	79.1697	98.0278	95.1042	95.835	105.074	110.788	107.944	86.0082	96.3223	107.935	290.266
same_same	Clec5a	ENSMUSG00000029915	0.214985	3.29e-07	0.20131	4.67e-07	808.362	803.129	812.117	928.189	979.399	905.591	943.439	924.292	918.781	847.812	937.727	928.838	2714.38
same_same	Ccnd1	ENSMUSG00000070348	0.29618	3.29e-07	0.359251	3.09e-09	629.514	619.416	620.179	771.611	757.008	766.459	781.795	814.851	801.049	670.402	765.026	799.232	2234.66
down_up	Hcar2	ENSMUSG00000045502	-0.805961	3.29e-07	0.0269425	0.821862	10.5228	11.8221	10.0893	6.18793	6.16456	6.2221	11.3916	11.0512	10.6778	9.36644	6.19153	11.0402	26.5982
same_same	Srpk2	ENSMUSG00000062604	-0.223256	3.32e-07	-0.324945	4.52e-11	97.2453	97.9175	95.3416	84.5161	82.52	81.9181	79.6123	75.7005	76.6469	92.5918	82.9848	77.3199	252.896
same_same	Dmtf1	ENSMUSG00000042508	0.30232	3.35e-07	0.315586	3.71e-08	37.0516	34.5667	36.9781	43.7855	46.1704	44.0333	43.9852	46.0696	45.1045	38.4434	44.6631	45.0531	128.16
same_same	Pip5k1b	ENSMUSG00000024867	0.376906	3.41e-07	0.135361	0.023234	48.8646	49.7726	48.1294	63.015	62.4108	65.1295	53.3115	54.9105	53.1128	53.639	63.5185	53.7783	170.936
same_same	Plekho2	ENSMUSG00000050721	0.201897	3.55e-07	-0.0599899	0.0607891	270.529	282.744	274.101	314.527	321.79	315.376	260.362	267.197	266.116	290.457	317.231	264.558	872.246
same_same	Lmnb2	ENSMUSG00000062075	-0.288235	3.55e-07	-0.272058	2.65e-07	66.4832	67.5057	69.1287	56.788	54.5457	54.8575	57.6035	55.0832	55.3834	64.4741	55.3971	56.0234	175.895
same_same	Znrf1	ENSMUSG00000033545	-0.238286	3.62e-07	-0.29692	1.44e-09	100.229	103.229	101.955	88.0409	84.7733	86.0048	78.8378	85.0595	84.6859	97.7417	86.273	82.8611	266.876
same_same	Cbx5	ENSMUSG00000009575	-0.192485	3.65e-07	-0.344476	5.25e-13	291.413	295.123	295.728	261.303	260.059	250.762	237.191	230.279	227.363	284.051	257.375	231.611	773.037
same_same	Mbd4	ENSMUSG00000030322	-0.425726	3.65e-07	-0.426667	8.29e-08	21.4488	23.3443	23.7026	17.3889	16.7081	16.7886	17.6522	16.4041	16.7838	21.4786	16.9619	16.9467	55.3871
same_same	Prune1	ENSMUSG00000015711	0.35028	3.71e-07	-0.0872223	0.125547	28.9881	27.8847	27.6129	34.3469	38.5604	35.0867	27.043	25.8666	26.6638	29.9481	35.998	26.5245	92.4706
same_same	Tbc1d9b	ENSMUSG00000036644	-0.261012	3.72e-07	-0.0938645	0.0194507	98.0113	99.5452	94.5692	82.5579	79.6716	81.6236	90.1003	90.516	93.2159	92.2241	81.2844	91.2774	264.786
same_same	Acox3	ENSMUSG00000029098	-0.460924	3.78e-07	-0.525855	7.62e-09	20.6425	21.3311	20.2752	15.9006	14.1147	15.1687	14.5542	14.5392	14.1757	19.169	15.0613	14.423	48.6533
same_same	Rhoc	ENSMUSG00000002233	0.264931	3.99e-07	0.420216	8.58e-12	181.871	168.764	162.057	205.298	205.386	205.808	225.509	229.657	231.383	178.706	205.497	228.85	613.053
same_same	Rps6kc1	ENSMUSG00000089872	0.354474	3.99e-07	0.1899	0.00104952	23.5856	23.7726	23.7509	30.2739	30.8228	29.8587	26.1717	28.0423	26.9399	25.9325	30.3184	27.0513	83.3022
down_same	Tst	ENSMUSG00000044986	-0.568234	4.16e-07	-0.64646	8.8e-09	14.4336	14.6062	13.1306	9.51688	9.69323	9.31474	9.03585	8.66826	9.26636	12.4179	9.50828	8.99016	30.9163
same_same	Htra2	ENSMUSG00000068329	-0.207041	4.26e-07	-0.277375	3.69e-10	101.721	101.687	103.017	87.4926	87.0265	90.7543	85.7115	85.0595	82.0779	97.3989	88.4245	84.2829	270.106
same_same	Mak16	ENSMUSG00000031578	0.24371	4.28e-07	0.156908	0.000133236	84.5051	80.6984	79.5559	93.5239	100.971	95.7614	89.8099	89.9634	93.2773	84.5928	96.7522	91.0169	272.362
same_same	C9orf72	ENSMUSG00000028300	-0.394054	4.28e-07	-0.247831	0.000112502	37.2532	40.9489	39.8745	29.8039	28.9522	30.8896	34.0135	33.2571	32.0947	36.8758	29.8819	33.1218	99.8794
same_same	P4ha1	ENSMUSG00000019916	0.245645	4.41e-07	0.436076	5.4e-13	129.096	125.759	125.754	149.764	155.304	146.495	167.099	172.018	175.907	133.759	150.521	171.675	455.955
same_same	Brd3	ENSMUSG00000026918	-0.261218	4.41e-07	-0.335915	9e-10	82.973	87.8517	87.8108	75.3909	69.0005	71.1307	69.7697	65.9962	68.884	83.6845	71.8407	68.2166	223.742
down_same	Naa80	ENSMUSG00000079334	-0.759224	4.44e-07	-1.17225	3.43e-11	13.2241	12.6787	10.2341	6.42291	6.67473	8.28386	4.8729	6.18175	5.12411	9.7786	7.12717	5.39292	22.2987
same_same	Car2	ENSMUSG00000027562	0.210071	4.48e-07	0.697182	1.37e-19	382.41	362.715	365.339	443.847	423.484	417.322	599.948	589.58	611.027	390.634	428.218	600.185	1419.04
same_same	Gramd1b	ENSMUSG00000040111	0.262931	4.53e-07	0.254913	2.79e-07	121.839	125.031	124.403	151.291	147.142	146.974	145.735	150.261	147.004	133.575	148.469	147.667	429.711
same_same	Ctc1	ENSMUSG00000020898	-0.321426	4.7e-07	-0.444259	2.06e-10	37.0113	38.9785	39.1504	30.1564	30.4827	31.3682	27.5916	27.9733	28.9344	36.0951	30.6691	28.1664	94.9306
same_same	Lpcat2	ENSMUSG00000033192	-0.192216	4.87e-07	-0.192162	1.56e-07	125.508	125.374	126.43	109.346	112.365	108.611	109.56	108.474	112.117	120.383	110.107	110.05	340.541
same_same	Ywhag	ENSMUSG00000051391	0.205067	5.23e-07	0.207326	1.82e-07	578.553	564.461	557.133	659.445	637.373	663.04	642.287	656.44	664.263	593.68	653.286	654.33	1901.3
same_same	Ppp2r2a	ENSMUSG00000022052	0.225357	5.23e-07	0.202039	1.23e-06	114.3	116.507	111.513	135.312	135.578	129.596	128.18	130.611	135.068	121.111	133.495	131.286	385.893
same_down	Cd200r4	ENSMUSG00000062082	-0.295781	5.23e-07	-1.01252	2.31e-19	87.6498	89.0938	88.2936	72.3753	74.1873	69.5108	45.0179	43.7557	42.6191	83.2542	72.0244	43.7976	199.076
same_same	Scly	ENSMUSG00000026307	-0.232097	5.23e-07	-0.556359	7.86e-16	73.7403	71.7891	71.7838	62.6626	60.8378	61.5583	49.8263	48.9705	49.0319	68.7451	61.6862	49.2762	179.708
same_same	Cipc	ENSMUSG00000034157	-0.312897	5.31e-07	-0.295133	3.63e-07	38.8256	43.2619	41.0331	34.1119	32.5659	32.3623	33.239	33.188	33.813	39.469	33.0134	33.4134	105.896
same_same	Ttc7	ENSMUSG00000036918	-0.32846	5.75e-07	-0.156711	0.00267006	48.7839	53.7561	51.7983	40.1824	40.431	42.1188	46.5992	43.0996	48.4489	48.5789	40.9107	46.0492	135.539
up_same	Gpat3	ENSMUSG00000029314	0.941109	5.81e-07	1.14674	1.49e-09	3.46729	3.25535	2.75163	6.42291	7.01484	5.00713	6.68007	6.90698	7.51741	4.1433	6.1483	7.03482	17.3264
same_same	Etf1	ENSMUSG00000024360	0.231314	6.1e-07	0.0782711	0.037981	338.786	337.7	346.657	408.012	417.192	375.977	359.401	360.648	360.069	364.123	400.393	360.039	1124.56
same_same	Nmd3	ENSMUSG00000027787	0.257478	6.36e-07	0.107145	0.0107233	48.9855	50.4579	50.9776	60.5085	58.0744	60.9692	54.4087	54.2543	53.2662	53.9814	59.8507	53.9764	167.808
down_up	Ankrd33b	ENSMUSG00000022237	-0.532189	6.36e-07	0.00339339	0.971483	20.199	18.6754	21.0958	13.5899	12.2016	15.4264	19.8143	20.4792	19.7601	17.7871	13.7393	20.0179	51.5442
same_same	Chka	ENSMUSG00000024843	-0.318842	6.39e-07	-0.128597	0.0100747	47.4131	46.9456	48.0329	41.4356	36.6047	36.0808	43.3398	45.0681	41.9134	45.4714	38.0404	43.4404	126.952
same_same	Myo1d	ENSMUSG00000035441	0.262274	6.42e-07	0.259315	3.31e-07	386.764	384.731	360.753	470.518	446.356	441.364	435.012	464.115	456.353	405.334	452.746	451.826	1309.91
same_same	Furin	ENSMUSG00000030530	0.285383	6.5e-07	-0.168389	0.000622509	103.293	107.983	104.224	126.461	131.284	126.872	92.0043	92.8298	95.8547	112.889	128.206	93.5629	334.658
down_same	Ypel3	ENSMUSG00000042675	-0.852524	6.56e-07	-0.86689	1.02e-07	5.44283	5.05436	5.35844	3.0548	2.72091	2.98219	2.74303	2.93547	3.00696	4.4892	2.9193	2.89515	10.3037
same_same	Xylt1	ENSMUSG00000030657	0.252636	6.71e-07	0.180797	5.22e-05	263.917	259.1	247.116	313.078	302.786	301.974	282.209	298.969	292.136	273.098	305.946	291.104	870.148
same_same	Msh2	ENSMUSG00000024151	-0.353262	6.82e-07	-0.401108	1.64e-08	38.3417	38.85	40.1642	31.2921	28.1869	32.1045	31.4964	28.3532	28.9037	36.7688	30.5279	29.5844	96.881
same_same	Sin3a	ENSMUSG00000042557	-0.222708	6.88e-07	-0.239623	5.02e-08	88.3755	86.0098	84.4799	73.4327	74.7399	73.8552	73.029	74.0083	72.4126	81.3075	74.0093	73.15	228.467
same_same	Chek2	ENSMUSG00000029521	-0.485042	6.93e-07	-0.389626	5.58e-06	18.9491	19.0609	16.2684	12.5717	13.8171	12.5915	13.941	13.1578	14.4212	15.967	12.9934	13.84	42.8004
same_down	Gpnmb	ENSMUSG00000029816	-0.239262	7.12e-07	-1.11199	6.84e-23	1191.94	1187.69	1138.35	974.716	999.636	1006.1	574.454	530.214	522.997	1100.25	993.485	542.555	2636.29
same_same	Exoc6b	ENSMUSG00000033769	0.179142	7.12e-07	0.201667	2.38e-08	107.687	106.527	106.348	119.646	122.653	120.76	124.243	122.288	122.181	110.841	121.02	122.904	354.765
same_same	B4galt5	ENSMUSG00000017929	-0.252525	7.19e-07	-0.528542	3.03e-14	156.27	155.829	146.03	129.046	125.927	129.78	105.364	108.267	104.293	143.635	128.251	105.975	377.86
same_same	Ap5z1	ENSMUSG00000039623	-0.355752	7.19e-07	-0.472085	8.06e-10	31.3265	31.6968	30.7507	23.6551	24.3181	25.2934	23.4932	23.1729	21.0488	28.7009	24.4222	22.5716	75.6947
up_same	Dmpk	ENSMUSG00000030409	0.524809	7.19e-07	0.433326	5.71e-06	14.1514	12.9786	11.3927	18.0938	19.429	18.2613	17.039	18.6143	16.7224	14.155	18.5947	17.4586	50.2083
down_same	Zc3h6	ENSMUSG00000042851	-0.552773	7.2e-07	-0.356907	9.71e-05	10.9663	9.76605	10.2341	6.77539	6.97233	7.36343	8.55179	7.42501	8.19244	8.92519	7.03705	8.05641	24.0187
same_same	Fus	ENSMUSG00000030795	0.177721	7.34e-07	0.129189	4.65e-05	342.536	335.944	337.92	379.657	386.071	383.966	370.663	374.255	366.758	351.173	383.231	370.559	1104.96
same_same	Acsl4	ENSMUSG00000031278	0.240971	7.35e-07	0.221448	1.36e-06	444.216	449.41	453.536	532.123	557.659	502.407	520.142	529.696	520.788	478.356	530.729	523.542	1532.63
same_same	Fgd6	ENSMUSG00000020021	0.300183	7.35e-07	0.453154	2.83e-11	41.4462	43.3047	40.1642	50.3259	53.5254	50.2554	57.7326	57.2934	56.1811	44.5983	51.3689	57.0691	153.036
same_same	Psmc6	ENSMUSG00000021832	0.225179	7.41e-07	0.26777	8.34e-09	107.163	102.929	109.293	126.539	127.415	119.435	127.244	126.95	130.128	112.92	124.463	128.107	365.491
up_same	Prkcg	ENSMUSG00000078816	0.554491	7.46e-07	0.521307	6.04e-07	9.7971	11.0082	9.31693	14.6474	15.1351	14.5796	13.8765	16.0587	13.5007	11.6575	14.7873	14.4786	40.9235
same_same	Knop1	ENSMUSG00000030980	-0.229624	7.48e-07	-0.49356	1.63e-14	103.938	104.385	101.472	88.7067	88.9822	86.7044	73.9971	75.148	71.0932	98.1882	88.1311	73.4128	259.732
same_same	Parp1	ENSMUSG00000026496	-0.177818	7.58e-07	-0.294813	7.7e-12	211.303	208.557	209.607	183.171	183.916	189.314	173.876	170.913	168.39	200.445	185.467	171.06	556.971
same_same	Ercc1	ENSMUSG00000003549	0.323195	7.71e-07	0.645074	2.84e-14	45.7198	41.8056	42.0951	52.2058	53.0152	57.0298	63.735	68.8626	70.3875	45.3688	54.0836	67.6617	167.114
same_same	Marcksl1	ENSMUSG00000047945	0.289801	7.73e-07	0.345015	1.08e-08	135.103	139.123	139.126	174.672	164.317	166.229	163.549	173.642	187.69	150.974	168.406	174.96	494.34
same_same	Mta2	ENSMUSG00000071646	0.196954	7.77e-07	0.0654027	0.0432199	122.081	115.179	114.169	134.49	137.746	131.069	123.081	120.009	124.82	121.279	134.435	122.637	378.351
same_same	Mmadhc	ENSMUSG00000026766	0.255601	7.93e-07	0.218639	3.33e-06	42.9379	42.6622	44.1709	51.6575	51.0595	52.0594	50.8589	48.4179	51.5173	46.1635	51.5921	50.2647	148.02
same_same	Pcdh7	ENSMUSG00000029108	0.184737	7.99e-07	0.195865	1.18e-07	660.881	669.489	667.488	754.888	774.821	741.129	745.393	764.845	778.098	697.288	756.946	762.779	2217.01
same_same	Sqor	ENSMUSG00000005803	0.252201	7.99e-07	0.704769	6.68e-18	66.1607	61.6803	63.8668	75.0384	76.2705	77.0951	104.654	107.3	100.795	66.8619	76.1347	104.25	247.246
same_same	Arf2	ENSMUSG00000062421	0.409536	8.09e-07	0.100792	0.141584	33.423	33.0247	32.0058	40.2215	49.0189	42.0084	34.9171	35.9854	34.8256	35.084	43.7496	35.2427	114.076
same_same	Sltm	ENSMUSG00000032212	0.212146	8.33e-07	0.167619	1.4e-05	126.112	127.044	127.347	148.236	152.924	139.868	145.122	141.766	140.468	134.209	147.009	142.452	423.671
same_same	Abcd1	ENSMUSG00000031378	-0.281081	8.33e-07	-0.145275	0.00164494	56.2829	60.6095	60.1014	49.4643	47.8285	48.1936	54.441	51.6297	53.7265	56.7251	48.4955	53.2657	158.486
same_same	Cldnd1	ENSMUSG00000022744	0.296322	8.7e-07	0.380907	1.31e-09	33.4634	32.8105	32.1506	39.2033	43.1944	38.8053	42.2426	41.3728	44.5522	34.7215	40.401	42.7225	117.845
same_same	Egr1	ENSMUSG00000038418	0.343459	8.71e-07	0.729674	1.37e-14	117.323	116.85	106.541	142.518	151.308	139.279	181.395	194.95	189.439	121.97	144.368	188.594	454.933
same_same	Arap1	ENSMUSG00000032812	-0.197527	8.76e-07	-0.0873778	0.00820006	298.59	292.725	297.128	263.574	257.466	253.744	272.269	279.353	284.588	284.476	258.261	278.737	821.474
up_same	Il1rap	ENSMUSG00000022514	0.518793	8.77e-07	0.336347	0.00021244	12.6999	13.4497	15.3995	21.6969	19.9817	17.6722	17.1036	17.7164	17.3974	16.8487	19.7836	17.4058	54.0381
same_same	Vmp1	ENSMUSG00000018171	0.171013	8.91e-07	0.390265	3.41e-15	163.204	161.611	164.519	182.544	182.683	185.595	212.052	215.325	213.924	169.558	183.608	213.767	566.932
same_same	Tmem184b	ENSMUSG00000009035	-0.215602	8.93e-07	-0.192254	2.01e-06	126.112	127.216	130.871	114.907	105.563	110.083	107.656	111.859	116.505	124.332	110.184	112.006	346.522
same_same	Skp2	ENSMUSG00000054115	-0.256441	8.93e-07	-0.399528	3.33e-11	46.5665	46.8599	48.4191	39.2033	39.9208	39.5416	34.788	35.4674	37.1268	44.8274	39.5552	35.7941	120.177
same_same	Lyar	ENSMUSG00000067367	0.223764	9.26e-07	0.240476	6.66e-08	53.7026	52.6853	53.5844	63.0934	63.9413	59.9383	64.7677	62.3355	61.8882	56.4544	62.3243	62.9971	181.776
same_same	Slfn9	ENSMUSG00000069793	-0.253005	9.35e-07	-0.556568	1.37e-14	106.72	106.013	102.293	86.4352	93.1911	85.1949	74.8685	68.6899	70.6943	98.2471	88.2737	71.4176	257.938
same_same	Ski	ENSMUSG00000029050	0.277599	9.71e-07	0.0430812	0.367257	130.668	136.896	124.354	161.787	160.704	153.122	131.181	137.035	135.927	141.012	158.538	134.714	434.264
same_same	Foxk1	ENSMUSG00000056493	-0.216671	9.96e-07	-0.235432	6.24e-08	80.8765	85.4958	80.9559	72.8452	70.8286	69.253	71.7059	70.5894	67.9022	79.7656	70.9756	70.0658	220.807
same_same	Arpc5	ENSMUSG00000008475	0.173306	1.01e-06	0.207061	1.36e-08	219.366	220.593	225.827	246.93	255.765	248.037	254.682	252.036	261.637	231.116	250.244	256.118	737.479
same_same	Extl3	ENSMUSG00000021978	0.228496	1.02e-06	0.259097	2.87e-08	87.2466	84.168	83.4661	101.866	99.4407	97.5654	98.9425	101.913	104.323	89.8333	99.624	101.726	291.183
same_same	Apex1	ENSMUSG00000035960	-0.255213	1.02e-06	-0.328409	2.3e-09	74.466	71.5321	73.6182	61.8401	59.0522	62.9573	59.8625	56.4646	58.5131	68.9968	61.2832	58.28	188.56
same_same	Btbd2	ENSMUSG00000003344	-0.402584	1.02e-06	-0.490207	6.66e-09	17.7799	19.1466	18.827	13.7466	14.6249	13.8064	13.2956	13.1233	13.2245	17.2401	14.0593	13.2145	44.5138
same_same	Zbtb21	ENSMUSG00000046962	-0.253885	1.06e-06	-0.287336	2.87e-08	52.0899	54.9126	51.9913	45.1562	45.2776	43.0392	44.9211	43.1341	42.2816	50.6867	44.491	43.4456	138.623
same_same	Pheta1	ENSMUSG00000044134	0.479835	1.07e-06	0.168886	0.0380981	21.3682	22.3163	22.1579	30.548	33.3311	28.1283	24.2354	24.5543	25.1603	25.0074	30.6691	24.65	80.3266
same_same	Bid	ENSMUSG00000004446	-0.205771	1.08e-06	-0.102174	0.00312785	128.088	129.572	125.947	112.244	106.583	113.655	119.66	119.007	118.806	122.588	110.827	119.158	352.573
same_same	Tnfrsf1a	ENSMUSG00000030341	0.206748	1.09e-06	0.26111	4.2e-09	156.915	159.469	154.719	184.855	175.584	183.202	185.332	186.799	192.476	166.348	181.213	188.202	535.764
same_same	Tmem185b	ENSMUSG00000098923	0.285197	1.1e-06	0.171263	0.000558591	59.6696	53.1993	58.0256	68.0281	73.6346	66.8967	63.9286	66.4106	62.2564	59.751	69.5198	64.1986	193.469
same_same	Wdfy3	ENSMUSG00000043940	-0.210529	1.12e-06	-0.347288	1.61e-11	293.026	310.329	305.576	273.64	255	256.726	231.64	240.294	242.429	296.515	261.789	238.121	796.425
same_same	Akna	ENSMUSG00000039158	0.306207	1.14e-06	0.185776	0.000520435	62.5724	66.0065	60.9704	82.6754	79.0339	73.0084	70.8669	71.6945	73.149	69.8841	78.2392	71.9034	220.027
down_same	Mxd1	ENSMUSG00000001156	-0.524664	1.15e-06	-0.381389	3.16e-05	16.6107	14.9489	15.3512	10.5351	12.1165	10.1247	12.037	12.6398	11.4449	13.6118	10.9255	12.0406	36.5778
same_same	Bzw1	ENSMUSG00000051223	0.176688	1.18e-06	0.130506	5.35e-05	296.937	291.097	308.134	335.636	345.725	331.502	325.42	325.699	329.723	311.623	337.621	326.947	976.191
same_same	Lzts2	ENSMUSG00000035342	-0.289106	1.18e-06	-0.197093	9.5e-05	43.3411	44.3756	44.6537	37.0101	35.3293	35.8967	38.3701	38.1611	38.8451	42.0131	36.0787	38.4587	116.551
same_same	Mbnl1	ENSMUSG00000027763	0.224238	1.2e-06	0.311156	8.65e-10	817.998	833.413	859.04	981.335	1024.51	926.798	1032.31	1063.5	1018.81	891.263	977.547	1038.21	2907.02
same_same	Gpr179	ENSMUSG00000070337	-0.368957	1.2e-06	0.119762	0.0373981	38.1402	42.4909	39.2952	30.7438	31.8006	30.3741	43.4043	46.035	41.0236	37.51	30.9729	43.4877	111.97
same_same	Pgpep1	ENSMUSG00000056204	-0.484931	1.21e-06	-0.286754	0.000425989	19.6345	18.5898	21.4338	15.6265	13.8171	13.1069	15.9741	17.1293	15.7405	18.55	14.1835	16.2813	49.0148
up_same	Ccr1	ENSMUSG00000025804	0.831289	1.23e-06	1.31304	5.86e-12	9.3133	9.38055	6.22738	15.3132	16.538	13.1805	20.9115	21.3426	20.4044	10.307	15.0106	20.8862	46.2038
down_same	Sp8	ENSMUSG00000048562	-0.938601	1.25e-06	-1.19279	4.96e-09	5.72506	5.26853	5.69636	2.42817	3.10354	3.16627	2.29123	2.24477	2.73081	4.46435	2.89933	2.42227	9.78595
same_same	Nptn	ENSMUSG00000032336	0.171975	1.26e-06	-0.0175233	0.571274	259.563	264.069	265.074	292.987	305.337	290.303	256.812	263.709	258.63	274.043	296.209	259.717	829.969
up_same	Sipa1l2	ENSMUSG00000001995	0.6909	1.26e-06	0.466245	0.00018022	8.26505	8.56671	8.59281	13.3941	15.2201	12.5546	11.2948	11.2929	12.4574	10.1846	13.7229	11.6817	35.5892
same_same	Mtmr4	ENSMUSG00000018401	-0.259604	1.28e-06	-0.413306	3.41e-11	53.743	51.8286	53.1982	44.6471	42.8118	45.0642	40.7581	39.6461	38.8451	49.8913	44.1743	39.7498	133.815
down_down	Dbp	ENSMUSG00000059824	-1.0113	1.28e-06	-2.13406	1.1e-12	4.39459	3.81219	4.6826	2.46734	1.57302	2.28266	1.0004	0.966977	0.951183	3.65404	2.10768	0.972853	6.73457
same_same	Top1	ENSMUSG00000070544	0.251394	1.29e-06	0.255942	3.34e-07	117.928	116.593	120.83	144.829	149.565	128.897	142.573	141.006	140.622	127.417	141.097	141.4	409.914
same_same	Dnttip2	ENSMUSG00000039756	0.229055	1.3e-06	0.0747684	0.0537993	91.8428	88.7512	93.2658	101.827	113.64	105.665	97.8453	95.489	94.9955	94.6146	107.044	96.11	297.769
same_same	Orai1	ENSMUSG00000049686	0.393635	1.3e-06	0.720728	3.88e-13	27.4158	26.257	28.6266	37.5192	34.5215	35.8599	42.7912	47.8999	44.8897	30.8009	35.9669	45.1936	111.961
up_same	Mcam	ENSMUSG00000032135	2.23992	1.3e-06	1.87484	1.56e-05	0.322538	0.171334	0.193097	1.37074	1.06285	0.920429	1.03267	1.00151	0.582983	0.578392	1.11801	0.872388	2.56879
same_same	Ranbp2	ENSMUSG00000003226	0.23581	1.32e-06	0.0578825	0.151698	368.581	371.11	382.766	436.249	467.741	417.875	393.834	386.342	388.113	396.708	440.622	389.43	1226.76
same_same	Cyld	ENSMUSG00000036712	-0.244178	1.32e-06	-0.110051	0.00676394	71.2407	73.2882	75.7905	62.8976	63.3461	59.7174	69.5115	68.3446	66.1225	70.6588	61.987	67.9929	200.639
same_same	Slc2a6	ENSMUSG00000036067	-0.228678	1.38e-06	-0.182969	1.67e-05	154.052	153.259	153.753	130.926	122.866	139.316	135.699	135.48	134.976	145.979	131.036	135.385	412.4
same_same	6030458C11Rik	ENSMUSG00000022195	-0.282957	1.38e-06	-0.202693	5.75e-05	46.6471	49.4728	48.5156	38.9291	40.1334	39.7625	40.5968	44.0665	41.0543	45.6392	39.6083	41.9059	127.153
same_same	Adss	ENSMUSG00000015961	0.197964	1.39e-06	-0.0525136	0.121538	168.889	166.751	171.663	185.795	208.064	188.32	162.387	163.177	163.511	174.736	194.06	163.025	531.821
down_up	Ppm1k	ENSMUSG00000037826	-0.529202	1.39e-06	0.0268218	0.763473	15.119	17.4333	15.2064	11.3576	11.0537	10.7138	17.394	15.2644	15.986	14.6657	11.0417	16.2148	41.9222
same_same	Ncl	ENSMUSG00000026234	0.17459	1.4e-06	0.0718003	0.0168418	1162.75	1110.29	1123.87	1258.97	1324.19	1250.9	1200.83	1166.93	1202.51	1164.38	1278.02	1190.09	3632.49
same_same	Il17ra	ENSMUSG00000002897	0.318824	1.4e-06	0.361531	5.96e-08	374.024	384.86	379.484	489.16	468.931	461.797	486.839	490.603	485.103	417.834	473.296	487.515	1378.65
down_same	Rab32	ENSMUSG00000019832	-0.557071	1.4e-06	-0.287071	0.00169574	18.8685	18.5041	20.6131	12.7283	12.9668	13.5855	15.49	16.3005	15.6485	17.2818	13.0936	15.813	46.1884
up_same	Egr2	ENSMUSG00000037868	0.616948	1.41e-06	0.997244	5.9e-12	11.8533	11.3937	10.3307	16.2531	19.429	16.1995	20.6211	23.6909	23.0125	12.6592	17.2939	22.4415	52.3946
same_same	Trim8	ENSMUSG00000025034	0.198639	1.45e-06	0.100211	0.00363252	135.305	139.209	144.823	160.142	160.193	160.523	148.252	149.605	151.269	148.058	160.286	149.709	458.053
same_same	Rwdd4a	ENSMUSG00000031568	0.281433	1.45e-06	0.302753	1.06e-07	47.2519	46.6886	50.1087	54.7906	60.5827	59.5333	58.6039	60.1943	58.6972	50.5293	58.3022	59.1651	167.997
same_same	Ppp1r13b	ENSMUSG00000021285	0.4017	1.45e-06	0.57612	1.98e-10	30.238	29.341	29.2059	41.0831	38.3053	37.9953	40.145	45.966	46.3625	33.21	39.1279	44.1578	116.496
same_same	Esd	ENSMUSG00000021996	0.205476	1.48e-06	0.34313	1.68e-11	272.706	247.835	261.791	295.454	303.679	303.042	332.906	337.13	322.512	268.36	300.725	330.85	899.935
same_same	Itpk1	ENSMUSG00000057963	0.390816	1.48e-06	0.308243	2.08e-05	18.9894	18.8039	18.9235	24.1251	25.5085	24.7779	22.4283	23.3111	24.4546	20.6175	24.8038	23.398	68.8193
same_same	Appbp2	ENSMUSG00000018481	0.234882	1.49e-06	0.123232	0.00256615	79.3041	83.0971	84.2385	98.4194	99.7383	92.0797	87.325	90.2742	90.7919	88.585	96.7458	89.4637	274.795
down_same	Cyb561a3	ENSMUSG00000034445	-0.533812	1.49e-06	-0.278431	0.00161743	13.8288	14.2636	15.6409	10.6918	9.82078	9.60927	11.7789	12.9851	11.2608	13.5321	10.0406	12.0083	35.581
same_same	Ccar1	ENSMUSG00000020074	0.202771	1.51e-06	0.153683	4.25e-05	137.643	136.896	140.623	158.066	163.297	156.473	154.933	152.541	154.214	145.195	159.279	153.896	458.37
same_same	Stau1	ENSMUSG00000039536	0.24414	1.52e-06	0.213372	4.35e-06	49.0258	48.1878	44.7019	57.9629	55.7786	54.7103	54.6346	54.5306	55.6595	50.2842	56.1506	54.9416	161.376
same_same	Nfe2l2	ENSMUSG00000015839	-0.172984	1.54e-06	-0.235071	1.68e-09	329.634	335.044	324.789	290.872	301.766	285.259	278.53	279.526	282.685	316.902	292.632	280.247	889.781
same_same	Fktn	ENSMUSG00000028414	-0.264041	1.55e-06	-0.360835	1.15e-09	66.5235	65.878	67.8253	54.3598	54.0355	58.0974	51.9561	50.6972	53.1128	62.6877	55.4976	51.9221	170.107
up_same	Plau	ENSMUSG00000021822	0.566634	1.59e-06	0.602543	2.31e-07	352.534	323.008	297.176	507.293	461.832	472.29	484.063	502.068	491.731	375.826	480.472	492.621	1348.92
same_same	Eda2r	ENSMUSG00000034457	0.442256	1.59e-06	0.609161	4.77e-10	18.1025	18.3328	17.2822	23.1068	26.1037	24.0048	26.4621	26.73	28.7809	19.5739	24.4051	27.3244	71.3034
same_same	Tubgcp6	ENSMUSG00000051786	-0.284984	1.65e-06	-0.27553	7.68e-07	43.1798	43.4332	43.9296	36.3443	36.3071	34.5345	36.9179	34.9148	35.9302	41.2357	35.7286	35.9209	112.885
same_same	Pacs2	ENSMUSG00000021143	-0.260915	1.66e-06	-0.159154	0.000486196	75.9175	77.9571	69.4666	64.6208	59.3923	62.5523	66.2844	67.0668	67.0123	70.6815	62.1885	66.7878	199.658
same_same	Chd9	ENSMUSG00000056608	0.2128	1.67e-06	0.174015	1.38e-05	69.4667	73.7594	69.708	84.8686	83.1577	78.936	79.4187	81.0189	79.8687	76.112	82.3208	80.1021	238.535
same_same	Naglu	ENSMUSG00000001751	-0.327526	1.67e-06	-0.766536	1.07e-14	43.4217	41.9341	43.1089	34.4644	31.9707	35.7494	25.7844	25.9703	23.8409	39.8358	34.0615	25.1985	99.0958
same_same	Npm1	ENSMUSG00000057113	0.170428	1.69e-06	0.147442	7.93e-06	792.235	763.166	757.085	857.772	884.38	860.453	846.207	840.545	874.628	792.674	867.535	853.793	2514
same_same	Rptor	ENSMUSG00000025583	-0.204147	1.69e-06	-0.394598	6.58e-13	169.534	169.235	168.284	153.014	143.825	143.329	124.566	132.51	128.747	163.511	146.723	128.608	438.842
same_same	Calm2	ENSMUSG00000036438	0.175314	1.73e-06	0.173419	8e-07	186.266	179.558	181.656	205.181	210.658	202.605	203.5	204.792	209.168	188.798	206.148	205.82	600.766
same_same	Esco2	ENSMUSG00000022034	-0.336132	1.73e-06	-0.495253	2.92e-10	48.3001	52.3855	53.9706	39.8691	43.1094	39.468	39.6609	34.6385	35.1631	48.7417	40.8155	36.4875	126.045
up_same	Hbegf	ENSMUSG00000024486	1.11294	1.75e-06	1.21204	6.85e-08	1.89491	1.79901	1.54478	4.11223	3.69873	3.60808	3.61434	4.76582	3.89678	2.48534	3.80635	4.09231	10.384
same_same	Tbce	ENSMUSG00000039233	0.296531	1.79e-06	0.0824626	0.108247	32.778	31.0972	29.399	38.185	38.9005	37.8112	32.0773	35.0184	32.0334	32.8937	38.2989	33.043	104.236
same_same	Ndel1	ENSMUSG00000018736	0.272668	1.83e-06	0.209668	3.6e-05	49.9934	50.8434	50.5431	59.9602	63.006	60.0119	55.4737	59.5727	59.9859	53.7823	60.9927	58.3441	173.119
same_same	Zbtb7b	ENSMUSG00000028042	0.327587	1.83e-06	0.723866	5.63e-15	32.5764	30.4547	30.0748	36.1485	39.8783	40.9775	51.7948	50.7663	51.4559	32.226	39.0014	51.339	122.566
same_same	Grk5	ENSMUSG00000003228	0.400456	1.83e-06	0.387075	9.45e-07	31.8507	31.7825	33.454	41.6706	43.8321	42.5606	44.5338	41.6836	40.6247	35.6357	42.6878	42.2807	120.604
same_same	Utp4	ENSMUSG00000041438	0.19703	1.85e-06	0.192933	8.47e-07	79.8282	80.1844	75.7423	90.3516	90.3426	89.8338	91.0684	88.0295	90.5771	82.0928	90.176	89.8917	262.16
same_same	Cx3cr1	ENSMUSG00000052336	-0.393804	1.86e-06	-0.245726	0.00035816	48.9452	55.084	55.2257	39.7516	43.3645	38.1057	41.7263	44.7572	47.4671	50.0204	40.4073	44.6502	135.078
same_same	Fbxo31	ENSMUSG00000052934	-0.467107	1.86e-06	-0.24728	0.00187621	11.0873	11.0511	10.2824	8.10697	7.4825	7.87887	9.32629	9.01361	9.02089	9.81348	7.82278	9.12026	26.7565
up_same	B430306N03Rik	ENSMUSG00000043740	0.985517	1.88e-06	1.03025	1.96e-07	2.13682	2.18451	1.97924	4.77802	3.99633	3.75535	4.51792	4.73128	3.71268	2.98059	4.17657	4.32063	11.4778
same_same	Rabggtb	ENSMUSG00000038975	0.245812	1.9e-06	0.311002	5.49e-09	52.3318	49.1729	49.5294	61.1352	59.3073	58.8338	64.0577	60.5742	62.8394	53.2792	59.7588	62.4905	175.528
same_same	Vegfb	ENSMUSG00000024962	-0.353481	1.9e-06	-0.462002	3.6e-09	28.0608	29.855	29.3507	23.2635	21.4271	23.4525	21.8797	21.2735	20.1896	27.4897	22.7144	21.1143	71.3184
same_same	Fbxl20	ENSMUSG00000020883	-0.398636	1.97e-06	-0.28229	8.15e-05	28.6253	29.5552	27.2267	22.2844	20.1942	22.2744	23.59	22.3786	24.2705	26.3554	21.5843	23.413	71.3528
same_same	Ak4	ENSMUSG00000028527	0.268676	1.99e-06	0.345081	4.03e-09	43.5427	42.1911	44.6054	52.0883	54.3331	50.6604	53.247	56.1883	56.0277	46.2949	52.3606	55.1543	153.81
same_same	Mier2	ENSMUSG00000042570	0.238376	1.99e-06	0.143945	0.000730745	37.4548	36.7084	36.7367	44.3338	44.1297	42.487	40.7581	41.7527	40.1338	39.2596	43.6502	40.8815	123.791
same_same	Pofut1	ENSMUSG00000046020	-0.236346	2.02e-06	-0.218975	2.08e-06	74.1838	74.7446	73.3768	66.0307	61.0504	61.6319	61.9924	65.4782	63.6372	71.384	62.9043	63.7026	197.991
same_same	Mical3	ENSMUSG00000051586	-0.344673	2.02e-06	-0.298653	5.45e-06	46.4455	50.5008	44.895	39.9866	35.6694	36.1176	38.6283	40.4404	36.5131	45.1275	37.2579	38.5273	120.913
up_same	Tmem119	ENSMUSG00000054675	0.594804	2.02e-06	0.270873	0.0106871	5.1203	6.03953	5.26189	7.55867	9.05552	8.24704	6.22828	7.18326	6.44349	6.2867	8.28708	6.61835	21.1921
up_same	Rara	ENSMUSG00000037992	0.538737	2.04e-06	0.661421	9.33e-09	22.8599	22.4448	21.6751	31.5271	34.8191	31.2578	34.9494	34.8112	36.2677	25.2157	32.5347	35.3427	93.0931
same_same	Bcl2l1	ENSMUSG00000007659	0.26808	2.05e-06	0.200921	6.86e-05	233.961	235.328	225.779	279.475	276.3	281.357	267.784	266.126	265.196	246.86	279.044	266.369	792.273
same_same	Csnk1g1	ENSMUSG00000032384	0.233955	2.05e-06	0.378697	2.6e-11	56.6458	57.654	53.6327	68.4197	63.8138	65.4241	71.9318	75.5278	71.2773	59.9021	65.8859	72.9123	198.7
same_same	Ets2	ENSMUSG00000022895	0.198845	2.06e-06	0.164668	1.8e-05	534.003	537.904	545.016	631.404	617.986	606.452	591.558	594.173	626.584	571.441	618.614	604.105	1794.16
same_same	Coro1a	ENSMUSG00000030707	0.200085	2.1e-06	0.479299	4.87e-15	321.692	326.178	326.72	368.182	368.343	382.935	439.82	457.415	461.354	340.36	373.153	452.863	1166.38
same_same	Ehmt2	ENSMUSG00000013787	-0.167213	2.12e-06	-0.0354833	0.22246	161.108	160.412	162.346	144.124	143.145	143.587	154.674	158.481	158.909	155.627	143.619	157.355	456.601
same_same	Ncor2	ENSMUSG00000029478	0.233541	2.14e-06	0.191696	2.06e-05	329.433	347.123	324.644	398.886	388.707	389.636	372.051	386.998	384.554	356.885	392.41	381.201	1130.5
same_same	Anpep	ENSMUSG00000039062	-0.248906	2.16e-06	-0.680736	2.54e-16	262.99	248.949	233.165	219.476	199.562	208.311	160.967	153.059	151.177	233.863	209.116	155.068	598.047
down_same	Zfp503	ENSMUSG00000039081	-0.556566	2.16e-06	-0.677039	1.76e-08	11.5711	12.6787	12.1651	8.69443	7.09987	8.83611	7.93864	7.11419	7.67083	11.1794	8.21014	7.57455	26.9641
down_same	Natd1	ENSMUSG00000018931	-0.532765	2.21e-06	-0.484068	2.42e-06	12.3774	12.2932	13.2271	9.90852	8.54535	7.7316	8.77768	9.35896	8.92884	11.8096	8.72849	9.02183	29.5599
same_same	Arhgap27	ENSMUSG00000034255	-0.252029	2.22e-06	0.124898	0.00317209	45.0747	46.1318	44.2675	38.185	36.4347	39.063	48.6	48.7978	50.3513	42.8614	37.8942	49.2497	130.005
same_same	Ddx3x	ENSMUSG00000000787	0.190846	2.26e-06	0.11285	0.00116885	478.526	472.711	485.494	541.091	568.16	530.756	518.27	508.768	526.495	499.766	546.669	517.845	1564.28
same_same	Wipf1	ENSMUSG00000075284	-0.161244	2.3e-06	-0.0909447	0.00164704	198.401	196.006	191.069	173.497	175.286	174.955	183.137	184.106	182.658	186.858	174.579	183.3	544.737
same_same	Aatk	ENSMUSG00000025375	-0.466921	2.33e-06	-0.615936	4.08e-09	15.0787	15.5914	13.9995	11.2401	11.2663	9.94063	9.61672	10.4986	9.14363	13.6103	10.8157	9.75299	34.179
down_same	H2bc21	ENSMUSG00000068854	-0.577325	2.33e-06	-0.268748	0.00516977	11.1679	12.9357	12.5996	8.38112	8.71541	7.5107	9.93943	9.73884	10.6778	11.3055	8.20241	10.1187	29.6266
down_down	Vash2	ENSMUSG00000037568	-0.897199	2.33e-06	-1.46833	1.36e-10	4.55585	6.42504	5.50326	2.97647	3.01851	2.83492	1.67809	1.96849	2.27056	4.96826	2.9433	1.97238	9.88394
same_same	Hmgcr	ENSMUSG00000021670	0.207042	2.36e-06	-0.0129488	0.746314	436.435	440.672	435.434	502.319	511.786	501.044	429.138	434.104	437.575	459.475	505.05	433.606	1398.13
same_same	Pak1	ENSMUSG00000030774	0.22184	2.36e-06	0.34356	1e-10	74.2241	76.1581	71.4941	89.1767	87.3667	82.5808	94.7796	90.9995	95.8547	78.943	86.3747	93.8779	259.196
same_same	Gtf2i	ENSMUSG00000060261	-0.199001	2.39e-06	-0.0469728	0.173639	137.038	138.824	137.726	119.999	118.827	121.386	136.409	132.545	131.386	132.183	120.071	133.447	385.7
same_same	Dmwd	ENSMUSG00000030410	0.330503	2.39e-06	0.61937	8.11e-13	53.743	57.5255	54.0671	69.7513	70.2334	68.0381	82.5812	84.4378	86.9565	60.448	69.3409	84.6585	214.447
same_same	Mcm10	ENSMUSG00000026669	-0.220935	2.39e-06	-0.601239	3.59e-16	70.9988	68.5337	72.4113	61.4093	60.5827	59.791	48.7936	46.2422	44.6442	67.4515	60.5944	46.56	174.606
same_same	Rbm47	ENSMUSG00000070780	-0.316666	2.41e-06	-0.426421	2.72e-09	55.275	56.5403	57.5912	47.0753	44.4273	44.4015	40.6613	42.6851	42.6191	53.7356	45.3014	41.9885	141.025
same_down	Clec4e	ENSMUSG00000030142	-0.185909	2.42e-06	-0.742753	1.7e-20	2049.53	2057	2113.59	1798.73	1890.73	1778.64	1274.02	1214.25	1228.81	1989.77	1822.7	1239.02	5051.5
same_same	Gabpb2	ENSMUSG00000038766	-0.179888	2.46e-06	-0.344222	1.44e-12	195.539	197.848	199.373	172.009	175.839	175.36	154.481	158.515	153.938	189.743	174.402	155.645	519.79
same_same	Wdr76	ENSMUSG00000027242	-0.314067	2.46e-06	-0.438655	1.34e-09	42.5751	41.0774	42.6261	36.3835	32.6934	32.4727	31.8836	29.2511	31.9106	40.029	33.8499	31.0151	104.894
same_same	Atp2a2	ENSMUSG00000029467	0.18385	2.47e-06	0.0961619	0.00377432	736.96	728.299	718.369	835.566	829.324	815.61	770.242	779.073	784.879	760.745	826.834	778.065	2365.64
same_same	AU022793	ENSMUSG00000115230	-0.372483	2.49e-06	-0.0548061	0.394545	64.427	61.9802	58.5566	47.2711	46.383	49.335	61.6374	59.1583	57.6233	55.936	47.663	59.473	163.072
same_same	Lrrc61	ENSMUSG00000073096	-0.451899	2.51e-06	-0.3557	2.27e-05	14.5949	14.4777	13.8064	10.1435	11.1387	10.1615	11.3271	10.9821	11.2301	12.8092	10.4813	11.1798	34.4702
same_down	Snx29	ENSMUSG00000071669	-0.456844	2.56e-06	-1.10132	1.83e-14	22.4971	21.8451	20.951	16.5664	14.7524	16.2364	10.1008	9.98059	10.371	19.7875	15.8517	10.1508	45.79
same_same	D430020J02Rik	ENSMUSG00000112980	-0.368892	2.56e-06	-0.566583	2.12e-10	18.2637	17.3904	18.5373	14.3341	13.1369	14.3955	12.5534	11.8455	12.1506	16.7539	13.9555	12.1831	42.8926
down_down	Gm19385	ENSMUSG00000110730	-1.28567	2.66e-06	-2.098	3.97e-10	2.17713	3.08402	3.1861	1.13576	1.40297	0.920429	0.774501	0.552559	0.613666	2.46863	1.15305	0.646909	4.26859
same_same	Cmtm6	ENSMUSG00000032434	0.254292	2.72e-06	0.198386	4.01e-05	44.47	44.1614	44.7985	51.8141	55.566	51.9122	49.9876	52.5276	50.6275	46.9247	53.0974	51.0476	151.07
same_same	Dstn	ENSMUSG00000015932	0.197462	2.74e-06	0.355897	3.96e-12	79.5057	85.5815	82.4041	93.8372	96.1671	93.7733	103.041	104.71	108.803	87.2743	94.5925	105.518	287.385
same_same	Dglucy	ENSMUSG00000021185	-0.231403	2.75e-06	0.201959	3.83e-06	58.1779	60.6952	60.3428	50.8742	51.6547	50.1081	68.4466	66.9632	70.5102	57.304	50.879	68.64	176.823
same_same	Dtx4	ENSMUSG00000039982	-0.257686	2.77e-06	-0.366443	1.17e-09	101.277	102.244	96.7416	89.2942	78.5237	83.3172	73.9326	81.0189	78.2118	96.0932	83.7117	77.7211	257.526
same_same	Chd7	ENSMUSG00000041235	0.261357	2.78e-06	0.193732	8.56e-05	64.2255	63.6079	63.9151	81.853	72.5717	75.2911	72.3191	74.5609	72.5047	69.792	76.5719	73.1282	219.492
same_same	Phf20	ENSMUSG00000038116	-0.206234	2.79e-06	-0.231601	1.16e-07	104.906	102.372	106.348	90.4299	93.1061	88.398	87.4541	87.9604	91.5283	99.7168	90.6446	88.9809	279.342
same_same	Gigyf1	ENSMUSG00000029714	-0.392023	2.81e-06	-0.39942	5.49e-07	39.1481	40.6062	38.7642	30.0389	28.442	31.6996	30.7219	31.0123	28.2593	36.4698	30.0601	29.9979	96.5278
up_same	Creb3l2	ENSMUSG00000038648	0.537977	2.81e-06	0.46288	1.02e-05	14.3126	16.4909	13.7582	21.9319	21.1296	21.7221	20.3629	20.4101	20.7419	17.3937	21.5945	20.505	59.4932
same_same	Atp1a1	ENSMUSG00000033161	0.161067	2.82e-06	0.0194358	0.521433	1192.75	1182.16	1143.04	1324.57	1304.17	1304.84	1169.46	1190.52	1205.76	1216.59	1311.19	1188.58	3716.36
down_same	Nt5dc2	ENSMUSG00000071547	-0.587938	2.84e-06	-0.530821	3.34e-06	8.99076	8.65238	8.11007	5.83545	6.03701	5.33849	5.90557	6.00907	5.95256	7.53263	5.73698	5.95574	19.2254
same_same	Cd274	ENSMUSG00000016496	-0.34895	2.86e-06	-0.329517	1.83e-06	26.5691	26.0856	23.7509	20.4045	20.0242	19.734	20.3629	20.8245	19.8214	23.4137	20.0542	20.3363	63.8042
same_same	Plec	ENSMUSG00000022565	0.304625	2.9e-06	0.0844344	0.122267	2685.25	2809.5	2739.66	3583.12	3419.93	3167.31	2793.66	3132.01	2805.13	3044.09	3390.12	2910.26	9344.48
same_same	Gnai3	ENSMUSG00000000001	0.185011	2.9e-06	0.165787	7.36e-06	255.692	254.089	264.398	293.378	305.124	281.651	285.533	291.889	290.908	270.622	293.385	289.443	853.45
same_same	Slc9a1	ENSMUSG00000028854	-0.252973	2.9e-06	-0.351825	1.84e-09	82.5698	83.0543	81.2455	68.9288	69.5957	68.7376	63.5414	65.8926	64.1281	77.7429	69.0874	64.5207	211.351
same_same	Orai2	ENSMUSG00000039747	-0.233462	2.9e-06	0.158879	0.00013288	47.9373	48.0593	48.9983	40.1824	41.2813	41.7875	54.9896	54.5997	52.2844	45.7467	41.0837	53.9579	140.788
same_same	Homer1	ENSMUSG00000007617	0.325321	2.9e-06	0.362473	1.12e-07	36.1243	34.224	37.7987	45.9395	48.9338	40.8302	46.3087	46.9329	45.6568	39.3207	45.2345	46.2995	130.855
same_same	Dars2	ENSMUSG00000026709	-0.265348	2.9e-06	-0.353354	4.17e-09	45.236	48.7446	46.5846	38.3808	39.4107	39.1366	37.3697	36.8833	35.7767	44.57	38.976	36.6766	120.223
up_same	Dpep2	ENSMUSG00000053687	1.04909	2.9e-06	0.85144	3.11e-05	2.90285	2.65568	3.08955	4.97384	6.24959	6.62709	5.3247	6.07814	4.26498	3.57302	5.95017	5.22261	14.7458
same_same	Plxnb2	ENSMUSG00000036606	-0.191263	2.92e-06	-0.247953	1.09e-08	852.55	866.737	869.95	771.611	741.235	754.825	723.868	721.296	735.141	836.099	755.89	726.769	2318.76
same_same	Plpp2	ENSMUSG00000052151	0.341272	2.92e-06	0.64648	7.13e-13	47.0503	39.7924	41.5158	55.2997	53.6104	54.0476	66.3489	67.3085	67.7181	45.536	54.3192	67.1252	166.98
same_same	Srebf1	ENSMUSG00000020538	-0.176898	2.93e-06	-0.0583929	0.0602432	154.778	155.315	158.774	140.09	136.981	137.549	148.285	153.404	148.538	151.393	138.207	150.076	439.675
same_same	Kctd10	ENSMUSG00000001098	0.193808	2.95e-06	0.346785	4.54e-12	66.322	63.8649	64.6875	73.1977	74.6974	75.0702	83.872	82.6075	81.4642	67.25	74.3218	82.6479	224.22
up_same	Tubb2a	ENSMUSG00000058672	0.593813	2.98e-06	0.712723	2.03e-08	5.40252	5.65403	5.69636	8.7336	7.82261	8.65203	9.06812	9.28989	9.08226	6.69466	8.40274	9.14676	24.2442
same_same	Prag1	ENSMUSG00000050271	0.257572	3.03e-06	0.0464176	0.326049	56.928	55.4266	58.3635	67.049	65.6419	71.0571	55.9577	60.9886	59.3108	60.2797	67.916	58.7524	186.948
same_same	Lfng	ENSMUSG00000029570	0.347908	3.06e-06	0.545414	7.85e-11	28.6253	28.827	27.5163	35.326	34.9041	37.8848	42.1135	41.58	40.4713	30.5564	36.0383	41.3883	107.983
same_same	Lratd2	ENSMUSG00000072568	-0.304578	3.06e-06	0.0757588	0.1371	35.3583	34.6095	34.2264	29.3339	27.2091	27.8338	35.4657	37.5049	36.9427	32.7233	28.1256	36.6378	97.4866
same_same	Ticrr	ENSMUSG00000046591	-0.334367	3.08e-06	-0.452796	3.36e-09	45.5182	47.2883	43.5916	36.0701	36.3496	35.8967	34.0135	31.2886	34.3346	42.3167	36.1055	33.2123	111.634
same_same	Mtf2	ENSMUSG00000029267	0.266529	3.1e-06	-0.0248112	0.629167	64.5077	61.509	62.5151	77.1141	80.6919	69.5108	61.5729	61.0923	62.686	67.0461	75.7723	61.7837	204.602
up_up	Procr	ENSMUSG00000027611	0.645696	3.18e-06	1.35676	1.03e-14	10.8454	9.29488	7.62733	14.0599	13.5195	16.1259	22.8155	25.694	23.4114	10.3274	14.5684	23.9736	48.8694
same_same	Tbc1d24	ENSMUSG00000036473	-0.323048	3.24e-06	-0.400228	1.99e-08	39.3497	40.4777	40.5504	32.2712	29.3348	34.3136	32.1418	28.5949	30.3458	37.7664	31.9732	30.3608	100.1
same_same	B4galt7	ENSMUSG00000021504	-0.294977	3.26e-06	-0.25944	6.85e-06	43.3814	43.0906	41.8538	34.5427	33.4162	36.5594	36.4016	34.8112	36.0222	39.829	34.8394	35.745	110.413
down_same	St6gal1	ENSMUSG00000022885	-0.755304	3.27e-06	-1.07072	2.17e-09	6.57172	5.78253	6.22738	4.11223	2.97599	3.8658	3.19482	2.55558	3.06833	5.37405	3.65134	2.93958	11.965
same_same	Pdp2	ENSMUSG00000048371	-0.296331	3.35e-06	-0.194149	0.000333091	54.7912	50.5436	50.4948	43.1197	38.8155	44.8433	45.7278	43.4104	47.1296	48.0527	42.2595	45.4226	135.735
same_same	Fgr	ENSMUSG00000028874	0.186857	3.37e-06	0.416762	4.22e-14	174.09	176.731	174.318	201.069	204.323	192.554	233.06	235.459	232.549	184.039	199.315	233.689	617.044
same_same	2610001J05Rik	ENSMUSG00000052419	0.212742	3.38e-06	0.361571	1.82e-11	65.3947	63.4794	65.1702	73.3544	73.7621	77.6105	86.1633	81.088	82.0165	67.3346	74.909	83.0892	225.333
up_same	Mafb	ENSMUSG00000074622	0.766327	3.38e-06	0.734003	1.99e-06	2.37872	2.69851	2.46199	4.38638	4.12388	4.30761	3.96932	4.21326	4.35703	3.18229	4.27262	4.17987	11.6348
same_same	Dip2c	ENSMUSG00000048264	0.297698	3.39e-06	-0.0922917	0.089718	83.8197	87.7232	82.6938	109.699	103.48	99.5536	76.7724	84.9904	77.0458	93.3719	104.244	79.6029	277.219
up_same	Tmem171	ENSMUSG00000052485	0.55786	3.4e-06	0.878897	3.88e-11	8.386	9.68039	8.11007	12.4934	12.7117	13.3646	15.6191	15.9206	16.661	10.0946	12.8566	16.0669	39.0181
same_same	Ints1	ENSMUSG00000029547	-0.185162	3.49e-06	-0.181374	1.69e-06	120.347	127.301	126.382	113.38	108.071	107.359	107.849	110.201	111.595	122.354	109.603	109.882	341.84
same_same	Fam53b	ENSMUSG00000030956	-0.279794	3.55e-06	-0.119333	0.0144204	46.889	47.5881	46.1984	39.7124	38.0502	38.1426	42.2426	42.3053	44.9204	44.4996	38.6351	43.1561	126.291
same_same	Zranb3	ENSMUSG00000036086	-0.249292	3.56e-06	-0.578142	2.86e-14	174.816	172.619	170.215	141.03	148.842	145.833	119.757	111.444	115.523	161.288	145.235	115.575	422.098
same_same	Pcyox1	ENSMUSG00000029998	-0.258785	3.57e-06	-0.0222125	0.643954	84.3841	78.4283	80.7145	67.3231	68.7029	67.6699	82.5167	76.633	80.6664	75.4886	67.8986	79.9387	223.326
same_same	Pcnt	ENSMUSG00000001151	-0.233311	3.61e-06	-0.52098	6.96e-14	107.97	108.883	106.203	95.3646	91.448	88.1771	74.6103	78.7051	72.0751	103.484	91.6632	75.1301	270.277
same_same	Mycn	ENSMUSG00000037169	-0.180006	3.62e-06	-0.173149	3.12e-06	637.094	644.902	664.012	588.793	564.163	564.665	571.485	563.368	590.899	632.569	572.54	575.251	1780.36
same_same	Rap1b	ENSMUSG00000052681	0.181464	3.63e-06	0.208685	1.32e-07	226.664	219.993	234.42	256.799	263.46	252.05	259.393	262.465	265.042	237.071	257.437	262.3	756.808
same_same	Vars	ENSMUSG00000007029	-0.175838	3.64e-06	-0.112636	0.000631855	243.396	241.581	239.826	219.593	206.874	215.086	225.283	221.783	223.344	233.667	213.851	223.47	670.988
same_same	Camta2	ENSMUSG00000040712	-0.242834	3.64e-06	-0.0891141	0.0355903	66.8864	71.3607	67.4391	59.177	54.7158	59.7174	65.8649	64.3385	63.2076	65.9923	57.87	64.4703	188.333
same_same	Ctns	ENSMUSG00000005949	-0.375385	3.64e-06	-0.328383	7.88e-06	29.1494	28.2273	26.937	21.4228	21.7673	21.9062	23.2028	20.79	23.1659	25.529	21.6987	22.3862	69.614
same_same	Zfp219	ENSMUSG00000049295	-0.420968	3.68e-06	-0.407208	1.7e-06	23.6663	22.2306	24.1371	18.1721	16.9632	17.12	18.0072	17.0948	17.6429	21.5133	17.4184	17.5816	56.5133
same_same	Baz2a	ENSMUSG00000040054	0.208235	3.83e-06	0.265613	1.4e-08	98.6967	98.8599	90.8521	115.025	112.79	105.997	113.626	118.075	115.523	101.579	111.271	115.741	328.591
same_same	Prkab2	ENSMUSG00000038205	0.392909	3.83e-06	0.147656	0.0391314	16.2479	16.4053	15.9788	20.6395	21.8523	21.4276	18.104	17.4056	18.3486	17.6745	21.3065	17.9527	56.9337
same_same	Lin7c	ENSMUSG00000027162	0.232283	3.91e-06	0.0953667	0.0238916	137.805	136.896	146.416	167.701	175.073	152.018	148.511	148.638	152.373	150.338	164.931	149.841	465.109
same_same	Osbpl8	ENSMUSG00000020189	-0.217538	3.93e-06	-0.689672	1.48e-17	956.608	1010.36	1009.08	863.177	893.266	803.129	611.437	629.33	604.338	960.87	853.191	615.035	2429.1
same_same	Primpol	ENSMUSG00000038225	-0.353353	3.96e-06	-0.379491	3.26e-07	22.9405	20.9456	23.944	18.0547	18.4937	16.5677	17.9749	16.9566	17.1213	20.9814	17.7053	17.3509	56.0377
same_same	Prkcsh	ENSMUSG00000003402	0.172285	3.98e-06	0.00192471	0.958062	114.017	118.263	113.251	129.633	131.156	128.713	117.047	111.686	117.21	120.383	129.834	115.314	365.531
same_same	Pole	ENSMUSG00000007080	-0.192402	3.99e-06	-0.576635	7.07e-17	101.519	103.486	99.0105	87.7276	89.4498	89.0238	69.1565	65.9962	68.6999	96.7413	88.7338	67.9509	253.426
same_same	Trim47	ENSMUSG00000020773	0.477205	4.02e-06	0.404701	1.72e-05	9.07139	8.09554	8.39972	11.9059	11.5639	12.1497	11.3271	11.0166	11.5369	9.46705	11.8731	11.2935	32.6337
same_same	Pcyox1l	ENSMUSG00000024579	-0.324109	4.07e-06	-0.0272044	0.647705	26.2466	26.0856	26.0681	20.9528	21.002	20.6912	25.6554	26.6955	24.6694	24.3688	20.882	25.6734	70.9243
same_same	Tdrkh	ENSMUSG00000041912	-0.154599	4.08e-06	0.0281859	0.315312	108.373	112.352	110.838	99.3593	98.5479	99.8481	112.174	114	111.902	107.516	99.2518	112.692	319.46
up_same	Bcorl1	ENSMUSG00000036959	0.532763	4.16e-06	0.734388	1.42e-09	7.7006	8.78088	7.43423	12.1017	10.6711	11.8183	13.4247	14.0212	12.4881	9.43894	11.5304	13.3113	34.2806
same_same	B4galt1	ENSMUSG00000028413	-0.220268	4.17e-06	-0.404066	7.97e-12	101.68	100.873	98.5277	83.3021	88.2169	87.1094	75.4171	75.3206	76.8617	94.2343	86.2095	75.8665	256.31
down_same	Rnasel	ENSMUSG00000066800	-0.614948	4.27e-06	-0.315973	0.00313834	10.6034	9.85172	11.7789	6.93205	6.97233	7.06889	9.13266	8.56466	8.13108	9.52089	6.99109	8.60947	25.1214
same_same	Plin3	ENSMUSG00000024197	-0.289047	4.33e-06	-0.478234	8.48e-11	36.4872	33.71	35.6264	29.7256	29.2498	27.7233	25.7844	24.6925	25.4671	33.0207	28.8995	25.3147	87.2349
up_up	Csf3	ENSMUSG00000038067	1.33817	4.39e-06	3.33639	1.56e-18	1.12888	0.642504	0.675839	1.87988	2.16822	2.24585	7.74501	8.1157	9.29704	1.06607	2.09798	8.38592	11.55
same_same	Nup210	ENSMUSG00000030091	-0.213152	4.41e-06	-0.170567	4.17e-05	114.582	116.336	114.362	102.962	93.1486	101.468	101.782	105.47	99.6901	111.22	99.193	102.314	312.727
same_same	Nab2	ENSMUSG00000025402	0.244828	4.43e-06	0.14773	0.0013118	102.809	104.128	101.521	121.213	118.402	125.767	111.496	114.518	115.768	108.954	121.794	113.927	344.675
same_same	Twf1	ENSMUSG00000022451	0.203224	4.45e-06	0.163678	3.96e-05	52.2915	51.8286	53.8258	61.7226	59.0947	60.8219	58.1844	59.6418	59.004	55.7923	60.5464	58.9434	175.282
down_up	Ajm1	ENSMUSG00000029419	-0.777543	4.45e-06	0.240327	0.0454235	4.95903	5.18286	4.53778	2.93731	2.72091	2.90855	5.97011	6.04361	5.40026	4.21932	2.85559	5.80466	12.8796
same_same	Myd88	ENSMUSG00000032508	0.243875	4.51e-06	0.501294	2.45e-13	59.2664	60.6523	57.8325	70.0254	67.555	72.8243	81.6776	83.609	86.4042	62.8368	70.1349	83.8969	216.869
same_same	Ahctf1	ENSMUSG00000026491	0.160377	4.7e-06	0.106915	0.000498995	159.092	156.385	154.478	174.554	176.009	174.808	171.003	169.463	165.813	161.806	175.124	168.76	505.689
same_same	Cyhr1	ENSMUSG00000053929	-0.28127	4.8e-06	-0.134574	0.00743896	49.7515	50.8863	49.4328	40.1824	41.5789	41.7506	45.0824	45.517	46.117	46.8338	41.1706	45.5722	133.577
same_same	AI839979	ENSMUSG00000107355	0.465295	4.83e-06	0.418105	8.15e-06	10.16	9.25205	9.12383	12.4934	14.1997	12.886	12.1016	13.2614	12.887	10.2897	13.193	12.75	36.2328
same_same	Asap1	ENSMUSG00000022377	0.214313	4.88e-06	0.0185328	0.660989	93.4152	92.6918	89.8383	107.388	110.239	102.941	95.1991	90.3433	94.0443	96.6394	106.856	93.1956	296.691
same_same	Rdh13	ENSMUSG00000008435	-0.246674	4.96e-06	-0.395314	1.91e-10	60.1131	55.855	57.6394	49.0335	50.7619	46.7946	42.3071	44.6536	45.1045	54.176	48.8633	44.0217	147.061
same_same	Eef1aknmt	ENSMUSG00000026694	-0.284361	5.09e-06	-0.111012	0.0270627	37.616	39.1927	40.4538	32.6629	30.2276	33.0986	36.4661	35.2601	36.6359	37.4365	31.9964	36.1207	105.554
same_same	Shc1	ENSMUSG00000042626	0.205989	5.25e-06	0.11639	0.00269706	124.742	133.684	126.816	151.918	144.336	148.005	140.056	136.758	140.714	137.473	148.086	139.176	424.734
same_same	Ints13	ENSMUSG00000040250	0.217186	5.25e-06	0.248505	1.56e-07	72.4502	70.6326	72.2183	84.4378	84.3056	81.6236	85.3565	82.6766	87.6008	75.7629	83.4557	85.2113	244.43
same_same	Tmem251	ENSMUSG00000046675	-0.406481	5.28e-06	-0.358502	9.3e-06	21.852	21.5025	24.5233	16.1356	17.5584	17.3777	18.104	17.4401	17.244	20.7205	17.0239	17.596	55.3404
same_same	Ap5s1	ENSMUSG00000068264	-0.463273	5.32e-06	-0.52131	1.98e-07	11.8936	11.9506	11.6824	9.63437	7.90764	8.21022	8.13226	7.94303	8.65269	11.0891	8.58408	8.24266	27.9158
same_down	Nr1d2	ENSMUSG00000021775	-0.331262	5.36e-06	-1.38633	1.56e-19	56.2426	57.5255	61.5496	45.2345	50.0817	44.0701	24.3968	19.9612	22.4602	54.7699	46.4621	22.2727	123.505
same_same	Ephx1	ENSMUSG00000038776	0.235044	5.42e-06	0.0253846	0.582765	79.0622	77.4859	69.9494	87.2968	91.1929	88.7661	76.3852	78.3252	76.3708	78.244	89.0853	77.027	244.356
same_same	Pdlim2	ENSMUSG00000022090	0.2992	5.5e-06	0.456104	3.2e-10	28.0608	29.9835	29.7852	37.1667	34.9467	35.7863	38.241	40.4404	41.6373	32.3118	35.9666	40.1062	108.385
same_same	Tmem104	ENSMUSG00000045980	-0.399864	5.51e-06	-0.367301	5.57e-06	17.9815	18.1614	16.9925	13.8249	12.6267	13.8064	14.2315	12.7434	14.2064	16.3263	13.4194	13.7271	43.4727
same_same	Itpr2	ENSMUSG00000030287	-0.181934	5.54e-06	-0.11991	0.000656032	387.812	370.468	367.753	338.26	324.681	329.771	350.268	346.834	339.296	358.827	330.904	345.466	1035.2
same_same	Baz1b	ENSMUSG00000002748	-0.166513	5.55e-06	-0.253671	8.36e-10	360.84	358.26	349.071	321.459	321.79	308.712	300.022	303.562	292.535	342.93	317.32	298.706	958.957
same_same	Ppp2ca	ENSMUSG00000020349	0.166426	5.61e-06	0.061587	0.0466391	240.13	243.552	250.736	273.365	282.677	268.139	252.229	259.633	254.457	255.885	274.727	255.44	786.051
same_same	Tnrc18	ENSMUSG00000039477	0.232096	5.83e-06	0.104467	0.0160571	144.497	158.827	164.663	187.479	183.491	178.158	161.516	173.987	167.163	170.323	183.043	167.555	520.921
same_same	Ccdc115	ENSMUSG00000042111	0.22775	5.88e-06	0.119828	0.00494147	46.9696	45.1894	47.0674	54.7123	53.5254	54.7103	51.1171	50.3864	49.7683	48.9897	54.316	50.4239	153.73
same_same	Asns	ENSMUSG00000029752	0.20065	5.91e-06	0.200038	2.58e-06	197.797	191.595	184.504	214.423	227.536	218.031	223.282	219.124	217.176	196.841	219.997	219.861	636.698
same_same	Wsb1	ENSMUSG00000017677	0.204767	5.91e-06	0.19697	4.5e-06	173.002	174.333	167.898	195.546	207.724	190.971	193.303	202.064	195.483	179.259	198.08	196.95	574.289
same_same	Ttc19	ENSMUSG00000042298	0.351271	6.08e-06	0.451823	1.27e-08	14.232	15.3773	15.0616	19.3471	19.0464	18.5558	20.0402	21.1699	19.8828	16.5953	18.9831	20.3643	55.9427
same_same	Sumf1	ENSMUSG00000030101	-0.154978	6.09e-06	-0.234094	8.97e-10	122.363	119.805	121.12	108.876	110.834	106.733	104.267	101.429	103.157	116.601	108.815	102.951	328.366
same_same	Cblb	ENSMUSG00000022637	-0.434355	6.09e-06	-0.3403	5.19e-05	15.2399	15.7199	15.1581	10.5351	12.074	11.5606	12.5534	12.9506	11.0153	13.8044	11.3899	12.1731	37.3674
same_same	Arrb2	ENSMUSG00000060216	0.24317	6.1e-06	0.472886	2.32e-12	113.775	115.265	104.514	128.693	130.051	136.371	150.899	157.376	155.258	116.157	131.705	154.511	402.373
same_same	Ddit3	ENSMUSG00000025408	-0.367621	6.14e-06	-0.591751	2.68e-10	24.271	24.1153	22.5441	18.7204	19.344	17.12	15.845	15.7134	15.5871	21.7933	18.3948	15.7152	55.9032
same_same	Uba6	ENSMUSG00000035898	0.193116	6.17e-06	0.141647	0.00019183	107.929	109.397	109.1	124.111	128.818	120.429	121.016	116.728	122.212	114.203	124.453	119.985	358.64
same_same	Vrk3	ENSMUSG00000002205	-0.36991	6.17e-06	-0.478965	1.91e-08	26.6094	29.5123	25.8267	21.3444	20.8745	21.2435	18.8462	19.5122	20.4658	25.5612	21.1541	19.6081	66.3234
same_same	Sptssa	ENSMUSG00000044408	-0.253296	6.18e-06	-0.553516	2.82e-13	50.9611	50.2009	53.9706	42.8455	46.2979	41.0879	34.2394	34.7767	36.4825	49.0057	43.4105	35.1662	127.582
same_same	Pnrc1	ENSMUSG00000040128	-0.261366	6.23e-06	-0.059629	0.205597	51.203	50.5436	53.4396	44.4904	39.7508	44.8433	49.0518	49.3504	50.3206	49.4912	43.0282	49.5743	142.094
same_same	Arhgap39	ENSMUSG00000033697	0.359129	6.25e-06	0.0608138	0.384534	20.8844	20.2603	21.0958	28.3548	25.3385	26.0665	21.0406	23.4147	20.5578	23.237	26.5866	21.671	71.4946
same_same	Ddx21	ENSMUSG00000020075	0.165216	6.28e-06	0.0453186	0.145623	375.193	365.113	371.518	420.505	426.97	399.392	379.925	377.674	389.678	385.712	415.622	382.426	1183.76
up_same	Il20rb	ENSMUSG00000044244	0.754226	6.3e-06	0.28765	0.0786802	2.41904	2.22735	2.26889	4.07307	3.91131	3.71853	2.67848	2.52105	3.22175	2.85643	3.90097	2.80709	9.56449
same_same	Slc39a14	ENSMUSG00000022094	0.232335	6.36e-06	0.378854	1.6e-10	100.229	100.273	93.0727	112.362	114.618	118.146	122.823	127.848	131.386	101.903	115.042	127.352	344.297
same_same	Smim15	ENSMUSG00000071180	0.26719	6.4e-06	0.620447	1.37e-14	38.8256	40.1351	42.1434	48.9551	51.6973	45.1378	61.5729	61.9556	62.3178	43.7445	48.5967	61.9488	154.29
same_down	Casp4	ENSMUSG00000033538	0.279742	6.4e-06	-0.300362	1.79e-06	32.2538	31.2257	32.3437	36.3443	37.7951	41.9715	27.2689	24.7961	25.6819	33.3046	38.7036	25.9156	97.9238
same_same	Bnip3l	ENSMUSG00000022051	-0.236442	6.41e-06	-0.59087	1.28e-14	71.6438	69.3047	67.6322	59.4511	62.1557	55.8884	45.5988	45.517	47.4364	65.4627	59.1651	46.1841	170.812
same_same	Cad	ENSMUSG00000013629	-0.176784	6.45e-06	-0.134065	0.000132665	207.594	205.001	208.014	187.126	178.815	182.981	191.883	185.28	188.303	200.047	182.974	188.489	571.51
same_same	Brwd3	ENSMUSG00000063663	0.314852	6.56e-06	0.309822	2.49e-06	22.4567	23.0873	22.4475	29.2556	28.8246	26.6188	28.592	27.9387	27.7684	24.9301	28.233	28.0997	81.2628
same_same	Ftsj3	ENSMUSG00000020706	0.167274	6.6e-06	0.146356	1.84e-05	93.1733	91.0642	90.2728	102.923	104.202	101.358	101.105	100.255	102.544	94.7534	102.828	101.301	298.882
same_same	Dennd2a	ENSMUSG00000038456	-0.299028	6.61e-06	-0.492617	1.72e-10	34.431	34.0955	31.5713	27.5324	26.8265	27.1342	22.751	23.6909	24.7921	31.0664	27.1644	23.7447	81.9754
same_same	Agfg2	ENSMUSG00000029722	-0.273564	6.78e-06	-0.319869	1.41e-07	45.8408	47.3311	47.357	39.5166	37.37	39.2103	36.9824	36.7106	38.753	44.7349	38.6989	37.482	120.916
same_same	Kdsr	ENSMUSG00000009905	-0.484516	6.78e-06	-0.802832	2.11e-10	12.3371	13.7067	15.2547	9.90852	10.0759	9.42519	7.58366	7.35594	8.56064	12.9566	9.80319	7.83341	30.5932
same_same	Itsn1	ENSMUSG00000022957	-0.231212	6.83e-06	0.0225534	0.61128	77.0867	80.0131	76.9009	69.9863	65.0892	64.3195	78.741	78.8087	80.1448	75.6334	66.465	79.2315	221.33
same_down	Por	ENSMUSG00000005514	-0.174065	6.86e-06	-0.749371	1.52e-20	398.859	390.085	382.815	351.655	354.398	332.753	227.09	233.18	236.814	374.852	346.269	232.361	953.481
same_same	Snx20	ENSMUSG00000031662	-0.232188	6.86e-06	0.0341106	0.427068	44.5909	43.5189	45.9571	38.2633	38.2203	37.5903	45.3406	45.7933	46.025	42.5798	38.0246	45.7196	126.324
same_down	Ext1	ENSMUSG00000061731	0.274466	6.86e-06	-0.524155	3.25e-11	39.0271	38.1219	38.1849	45.9395	45.6602	47.8623	27.5593	25.9703	26.6638	40.7488	46.4873	26.7311	113.967
same_same	Abi2	ENSMUSG00000026782	0.312072	6.86e-06	0.164236	0.00551561	28.9881	30.8402	31.0886	37.6367	38.0927	37.038	32.8518	33.637	35.1938	33.1885	37.5892	33.8942	104.672
same_same	Elk3	ENSMUSG00000008398	0.30102	6.89e-06	0.642794	1.95e-13	82.5295	84.6391	74.632	99.6335	96.5072	102.131	122.145	123.911	132.03	86.3015	99.4238	126.029	311.754
same_same	Ltv1	ENSMUSG00000019814	0.230902	6.93e-06	0.168832	0.000200296	45.8811	44.5041	48.3708	53.8506	54.8008	54.0107	51.2139	52.1822	52.3764	48.9085	54.2207	51.9242	155.053
same_same	Unc93b1	ENSMUSG00000036908	-0.149239	7.04e-06	-0.251597	1.19e-10	187.717	191.338	193.145	172.048	169.036	174.661	156.966	162.59	160.995	185.51	171.915	160.184	517.609
same_same	Pgls	ENSMUSG00000031807	-0.215468	7.04e-06	-0.183633	2.43e-05	70.3134	72.0461	78.4456	61.1743	63.9839	64.6141	63.0896	64.5457	66.3373	70.5553	63.2574	64.6575	198.47
same_same	Tpm4	ENSMUSG00000031799	0.159701	7.19e-06	0.321108	2.41e-12	484.493	463.159	474.922	526.483	535.934	526.743	586.588	586.748	603.878	488.188	529.72	592.405	1610.31
same_same	Ptafr	ENSMUSG00000056529	-0.404374	7.21e-06	-0.638658	5.23e-10	19.9571	22.7446	19.4062	15.8223	15.0925	16.0155	12.5856	13.6413	13.7154	19.3244	15.6434	13.3141	48.2819
up_same	Plekhh1	ENSMUSG00000060716	0.513218	7.26e-06	0.437205	2.74e-05	6.49108	6.3822	6.42047	8.77276	9.22558	9.53564	9.1972	8.63373	8.31518	7.19181	9.17799	8.71537	25.0852
same_same	Fnbp1	ENSMUSG00000075415	-0.169175	7.34e-06	-0.181374	9.25e-07	190.781	195.964	187.69	172.322	165.38	173.114	167.68	169.877	169.126	185.325	170.272	168.894	524.492
same_same	Arntl	ENSMUSG00000055116	0.385258	7.43e-06	0.869068	1.54e-14	13.2644	13.3641	12.5513	17.1539	17.4308	16.715	23.0414	25.5213	23.2273	14.3564	17.0999	23.93	55.3863
same_same	Gpatch4	ENSMUSG00000028069	0.303686	7.47e-06	0.19827	0.000788696	39.1078	40.5634	33.1161	46.2136	46.6381	46.905	42.4362	42.4089	44.9817	39.9644	46.5856	43.2756	129.826
same_same	Igf2bp2	ENSMUSG00000033581	0.182603	7.54e-06	-0.148679	7.47e-05	139.216	136.768	137.871	160.455	158.153	151.245	123.63	125.603	124.145	145.031	156.618	124.459	426.108
same_same	Manf	ENSMUSG00000032575	0.192335	7.55e-06	0.111185	0.00278199	189.33	180.629	175.525	207.296	204.918	211.33	199.144	192.601	197.723	187.817	207.848	196.489	592.154
same_same	Neil3	ENSMUSG00000039396	-0.297947	7.57e-06	-0.56399	1.07e-11	28.2624	31.4398	30.799	24.5167	24.0205	24.9252	20.4275	20.7555	19.9748	28.9185	24.4875	20.3859	73.7919
same_same	Cd53	ENSMUSG00000040747	0.203149	7.7e-06	0.299005	2.6e-09	305.807	306.817	309.727	361.602	358.905	341.369	379.247	378.779	376.699	326.049	353.959	378.242	1058.25
same_same	Nisch	ENSMUSG00000021910	-0.17266	7.79e-06	-0.188338	7.87e-07	276.738	281.845	273.908	251.708	240.928	245.939	242.419	244.852	243.411	269.154	246.191	243.561	758.906
same_same	Bin2	ENSMUSG00000098112	0.254256	7.79e-06	0.376594	1.33e-09	72.7727	69.4761	66.3771	83.8895	82.0524	83.2436	90.3262	87.4079	93.4	73.2475	83.0618	90.378	246.687
same_same	Vps39	ENSMUSG00000027291	-0.188297	7.79e-06	-0.183224	3.8e-06	68.5797	68.9192	67.7287	60.3127	60.7103	59.202	59.6689	60.9541	60.2007	65.6536	60.075	60.2745	186.003
same_same	Casp2	ENSMUSG00000029863	-0.266084	7.79e-06	-0.286919	6.77e-07	48.7839	51.486	50.6879	43.903	40.2184	41.272	40.5645	40.9239	42.1282	48.6923	41.7978	41.2055	131.696
same_same	Gnl2	ENSMUSG00000028869	0.215404	7.86e-06	0.141877	0.000745772	67.5315	63.6935	64.784	71.4745	78.056	78.1996	71.4477	72.8687	72.1058	66.6507	75.9101	72.1407	214.701
same_same	Tuba1a	ENSMUSG00000072235	0.344177	8.01e-06	0.642436	3.87e-12	26.7707	24.6293	23.5578	30.7438	30.7803	33.7613	40.0159	36.1926	40.9622	26.3103	31.7618	39.0569	97.129
same_same	Sntb2	ENSMUSG00000041308	-0.183499	8.16e-06	-0.216663	1.97e-07	205.013	212.412	215.255	192.609	182.088	182.208	173.262	183.657	187.322	206.759	185.635	181.414	573.807
same_same	Mapre2	ENSMUSG00000024277	0.245524	8.16e-06	-0.209587	5.13e-05	67.3702	69.7759	65.1219	79.5423	79.544	80.8504	58.5717	59.1928	57.3471	71.48	79.9789	58.3705	209.83
same_same	Cpne2	ENSMUSG00000034361	-0.20154	8.25e-06	-0.323108	3.79e-10	76.4416	74.0164	69.5149	62.5842	65.1317	63.9514	59.2816	57.5352	59.2495	68.7052	63.8891	58.6887	191.283
same_same	Limd1	ENSMUSG00000025239	0.148224	8.55e-06	-0.0274026	0.345011	145.465	143.021	147.092	161.826	159.853	160.928	138.41	144.805	144.12	150.646	160.869	142.445	453.96
up_same	Ier5l	ENSMUSG00000089762	0.711659	8.69e-06	0.998638	2.21e-09	3.74951	4.54036	4.24813	7.71533	7.26993	5.59621	7.77728	8.91001	8.34586	5.50127	6.86049	8.34438	20.7061
same_same	Rab8b	ENSMUSG00000036943	-0.165853	8.75e-06	-0.280081	1.52e-10	146.11	149.96	147.671	131.239	134.855	129.56	122.145	119.767	123.439	142.957	131.884	121.784	396.625
same_same	Rbm3	ENSMUSG00000031167	0.183765	9.03e-06	0.281273	1.19e-09	170.341	162.082	157.857	179.45	190.974	186.884	201.112	197.781	197.294	166.463	185.769	198.729	550.961
same_same	Tagln2	ENSMUSG00000026547	0.21407	9.08e-06	0.279398	3.46e-08	224.366	222.777	215.351	245.676	270.135	253.044	265.718	274.311	264.306	227.935	256.285	268.112	752.332
same_same	Jade1	ENSMUSG00000025764	-0.264918	9.09e-06	-0.26603	2.57e-06	44.5506	44.1614	48.757	37.715	39.7508	36.854	40.2741	37.1596	36.6666	43.5445	38.1066	38.0334	119.684
down_up	Gm37795	ENSMUSG00000102813	-0.591312	9.19e-06	-0.00115623	0.993333	11.0066	11.1367	10.6203	7.71533	6.84478	7.17934	11.2625	11.6037	9.97208	9.82413	7.24649	10.9461	28.0167
same_same	P2ry2	ENSMUSG00000032860	0.248644	9.33e-06	0.239512	5.37e-06	40.7205	41.3772	39.778	49.7384	46.8081	48.2673	46.7605	47.7963	49.3694	43.6312	48.2713	47.9754	139.878
same_same	Vamp1	ENSMUSG00000030337	-0.457283	9.38e-06	-0.310555	0.000405097	15.6028	18.2043	16.5581	12.8067	12.2441	11.6342	14.1669	13.9521	12.5188	15.8563	12.2283	13.5459	41.6306
same_same	Pkn1	ENSMUSG00000057672	-0.181745	9.39e-06	-0.0761026	0.0268918	152.601	153.601	142.65	134.137	131.284	130.627	140.507	146.704	139.057	143.463	132.016	142.089	417.568
same_same	Lonrf3	ENSMUSG00000016239	-0.248399	9.42e-06	-0.397423	4.9e-10	58.0972	56.2833	57.4946	45.9395	50.2943	48.5618	42.9526	44.6882	42.9259	53.2391	48.2652	43.5222	145.027
up_same	Gm45867	ENSMUSG00000109243	0.922763	9.5e-06	0.832104	1.64e-05	3.87046	3.55519	4.05504	8.10697	7.1849	6.47982	6.45418	7.73582	6.29008	5.23906	7.25723	6.82669	19.323
same_same	Snhg5	ENSMUSG00000097195	0.368353	9.62e-06	0.117607	0.0985792	21.2472	20.2603	20.7579	24.3209	26.869	29.1224	22.2992	24.1399	21.2635	21.7797	26.7707	22.5675	71.118
same_same	Bahcc1	ENSMUSG00000039741	-0.398092	9.65e-06	-0.244325	0.00127201	33.3021	36.6655	35.4816	26.8274	25.5935	27.4288	28.947	29.3547	30.5913	32.9915	26.6166	29.631	89.2391
same_same	Hexa	ENSMUSG00000025232	-0.141834	9.68e-06	-0.194809	1.35e-08	216.383	220.85	219.02	196.839	197.946	199.954	191.237	191.807	190.298	212.236	198.246	191.114	601.597
same_same	9930014A18Rik	ENSMUSG00000097493	-0.277381	9.68e-06	-0.407566	2.85e-09	31.2056	31.5255	31.1852	26.0833	26.3588	25.1093	23.945	23.3801	23.4727	29.598	25.8505	23.5993	79.0477
same_same	Mknk2	ENSMUSG00000020190	-0.178325	9.79e-06	-0.360493	2.93e-12	95.5923	96.8895	96.2588	84.242	83.2003	87.5512	73.8681	76.2531	74.8059	92.4635	84.9978	74.9757	252.437
same_same	Gsap	ENSMUSG00000039934	-0.231103	9.92e-06	-0.200851	2.59e-05	77.0867	76.3723	75.5492	59.9211	69.6382	65.7922	64.8322	68.6554	65.9077	70.6142	65.1172	66.4651	202.196
same_same	Trip12	ENSMUSG00000026219	0.168093	1.01e-05	0.125359	0.000260035	349.914	342.669	348.009	393.717	400.016	375.572	379.183	374.427	381.424	361.465	389.768	378.345	1129.58
same_same	Ralb	ENSMUSG00000004451	0.171262	1.01e-05	0.139888	7.19e-05	97.0034	99.7166	95.7278	110.364	109.389	109.641	103.751	109.061	109.509	101.936	109.798	107.44	319.175
same_same	Cap1	ENSMUSG00000028656	0.180826	1.02e-05	0.308471	1.81e-10	879.078	866.78	813.324	966.022	955.804	979.262	1030.76	1061.81	1076.92	882.042	967.029	1056.5	2905.57
same_same	Gda	ENSMUSG00000058624	-0.224974	1.02e-05	-0.62162	2.2e-15	339.714	374.58	371.422	304.383	314.733	309.595	242.096	233.214	230.125	350.128	309.57	235.145	894.844
same_same	Cd72	ENSMUSG00000028459	0.218384	1.02e-05	0.411534	8.67e-12	84.6663	82.1548	79.4111	96.9703	91.4905	98.0809	107.301	107.783	112.669	86.1787	95.5139	109.251	290.944
same_same	Tmem165	ENSMUSG00000029234	0.182309	1.02e-05	0.108931	0.00231576	87.3273	84.7676	87.7143	99.1635	102.587	93.2946	92.4238	93.7623	93.9523	90.5485	98.3483	93.3795	282.276
up_same	Abi3	ENSMUSG00000018381	0.633814	1.02e-05	0.375798	0.00284187	3.74951	4.71169	4.82742	6.34459	7.09987	7.06889	6.45418	5.24931	5.43095	5.29457	6.83778	5.71148	17.8438
same_same	Cd82	ENSMUSG00000027215	-0.198795	1.03e-05	-0.394482	5.12e-12	106.034	105.585	106.541	88.2367	93.7438	95.1723	80.2254	78.3597	83.3052	100.121	92.3843	80.6301	273.135
same_same	Fos	ENSMUSG00000021250	0.445645	1.03e-05	0.501257	3.89e-07	17.659	17.2191	17.9097	21.5794	27.6767	22.8634	24.655	23.2075	26.6945	18.9028	24.0399	24.8523	67.7949
same_same	Srf	ENSMUSG00000015605	0.259276	1.05e-05	0.05413	0.289964	60.4759	64.3789	62.6117	74.5293	77.886	72.088	61.476	65.6854	67.3499	67.1733	74.8344	64.8371	206.845
same_same	Itgax	ENSMUSG00000030789	0.473765	1.08e-05	0.467824	3.79e-06	15.6834	11.9934	14.1926	20.757	18.5362	18.924	19.0721	19.8921	19.085	15.6477	19.4057	19.3497	54.4031
same_same	Szt2	ENSMUSG00000033253	-0.266553	1.09e-05	-0.273489	2.22e-06	51.7674	55.4695	58.0739	47.5061	43.7896	45.7269	46.4701	46.035	44.0305	53.6831	45.6742	45.5119	144.869
same_same	Themis2	ENSMUSG00000037731	0.336324	1.09e-05	0.630578	5.86e-12	25.9643	23.8155	24.7164	32.0754	31.6306	30.4846	38.3055	36.9524	40.0724	26.8691	31.3969	38.4434	96.7094
same_same	Topbp1	ENSMUSG00000032555	-0.181497	1.1e-05	-0.426885	1.07e-13	214.004	222.349	219.551	194.293	192.632	191.376	167.454	159.724	160.627	212.064	192.767	162.602	567.433
same_same	Rock1	ENSMUSG00000024290	0.211796	1.1e-05	0.158636	0.000246106	152.359	155.186	159.643	177.335	193.227	170.684	174.65	171.362	175.202	164.055	180.415	173.738	518.208
same_same	Slc6a6	ENSMUSG00000030096	-0.181772	1.11e-05	-0.196011	1.56e-06	807.515	817.136	790.008	721.403	694.894	712.522	705.797	684.793	717.314	776.182	709.606	702.635	2188.42
same_same	Tmem144	ENSMUSG00000027956	-0.368432	1.12e-05	-0.470649	5.34e-08	40.4786	41.7627	39.0539	31.018	29.6749	33.1722	28.947	29.5619	29.1185	37.2782	31.2884	29.2091	97.7757
same_same	Pnn	ENSMUSG00000020994	0.210246	1.13e-05	-0.0597778	0.147219	132.604	126.188	122.713	145.534	156.41	140.2	127.115	121.874	117.425	131.478	147.381	122.138	400.997
same_same	Xrn2	ENSMUSG00000027433	0.1555	1.14e-05	-0.0548672	0.0705848	157.278	155.914	155.974	174.789	175.754	172.12	150.35	150.02	151.299	162.226	174.221	150.556	487.003
same_same	Wdr43	ENSMUSG00000041057	0.19281	1.14e-05	0.0792493	0.0342374	129.378	123.446	134.83	142.832	156.622	143.66	136.215	134.065	138.934	133.703	147.705	136.405	417.812
same_same	Prkdc	ENSMUSG00000022672	-0.221694	1.14e-05	-0.340055	1.46e-09	52.4528	51.5716	52.3293	46.0178	45.1501	43.0024	41.3713	40.1986	41.8827	49.9729	44.7234	41.1509	135.847
same_same	Irx2	ENSMUSG00000001504	0.230404	1.15e-05	0.147085	0.00128375	40.3979	40.6062	42.2882	46.9186	48.7213	48.8563	43.5334	45.4825	47.3137	43.271	48.1654	45.4432	136.88
same_same	Phf10	ENSMUSG00000023883	0.229916	1.16e-05	0.0722858	0.104814	43.0589	41.9341	41.8055	48.7985	49.2739	50.6604	44.2111	45.6551	43.601	44.1793	49.5776	44.4891	138.246
same_same	Ptchd1	ENSMUSG00000041552	0.369106	1.16e-05	0.191249	0.0081904	20.844	20.9456	21.1924	25.8483	28.5695	26.987	23.9773	23.242	24.608	22.6621	27.1349	23.9424	73.7395
same_same	Epn2	ENSMUSG00000001036	0.187467	1.17e-05	0.0440698	0.230632	70.7165	71.8319	70.3356	81.5005	81.6698	79.3778	73.0613	72.7651	73.6706	74.556	80.8493	73.1657	228.571
same_same	Fam168b	ENSMUSG00000037503	-0.130886	1.18e-05	-0.224209	1.82e-10	255.531	254.217	250.254	232.204	233.063	228.966	217.99	215.947	216.747	245.558	231.411	216.895	693.864
same_same	Tnip3	ENSMUSG00000044162	0.242898	1.18e-05	0.388361	5.43e-10	87.1257	89.9933	90.9004	107.505	108.241	101.431	116.917	116.935	116.781	96.1331	105.726	116.878	318.737
same_same	Apaf1	ENSMUSG00000019979	-0.174676	1.18e-05	-0.102166	0.00259483	72.0873	71.5749	72.2665	64.1116	64.1539	63.0678	65.4131	66.8941	68.792	69.3177	63.7778	67.0331	200.129
same_same	Nfia	ENSMUSG00000028565	-0.409479	1.18e-05	-0.256528	0.00112571	15.6431	16.2339	17.0891	12.3759	11.8189	12.5546	14.0378	13.2269	13.6234	15.233	12.2498	13.6294	41.1121
same_same	Rhog	ENSMUSG00000073982	0.223689	1.2e-05	0.30254	1.67e-08	70.6762	73.5452	70.7218	82.323	79.9692	88.4348	85.2597	89.2727	90.5771	75.53	83.5756	88.3699	247.475
same_same	Dtymk	ENSMUSG00000026281	-0.231652	1.2e-05	-0.141234	0.00172746	60.5969	59.453	59.9566	50.6392	49.1889	53.3112	56.2804	55.6703	51.4252	56.6829	51.0464	54.4586	162.188
same_same	Slc8b1	ENSMUSG00000032754	-0.203398	1.2e-05	-0.215897	1.44e-06	56.5652	57.4827	54.7913	48.7985	49.0189	48.93	48.6968	48.5561	48.2342	53.6908	48.9158	48.4957	151.102
same_same	Zfp330	ENSMUSG00000031711	0.238807	1.2e-05	0.253063	1.4e-06	32.2942	32.9818	32.1989	37.6759	40.346	37.1853	39.8545	38.8518	37.5257	34.2855	38.4024	38.744	111.432
same_same	Kansl1l	ENSMUSG00000026004	-0.406172	1.2e-05	-0.410866	2.79e-06	21.0859	22.3163	23.9923	18.1721	17.856	14.8373	17.0713	16.5422	16.9065	21.4936	16.9551	16.84	55.2887
same_same	Sh3bgrl2	ENSMUSG00000032261	-0.189748	1.22e-05	-0.0459066	0.212765	152.359	150.774	157.133	137.858	133.537	132.026	146.348	147.43	151.852	148.588	134.474	148.543	431.605
same_same	Pex5	ENSMUSG00000005069	0.214223	1.22e-05	0.275101	4.66e-08	64.2255	60.3953	62.7565	72.1403	71.2538	73.9288	71.9641	78.118	76.7696	65.0974	72.441	75.6172	213.156
same_same	Cnnm3	ENSMUSG00000001138	-0.432272	1.22e-05	-0.369601	3.3e-05	23.9082	26.1713	24.813	18.9946	16.4955	19.8076	19.8143	19.1669	18.9623	23.3263	18.4326	19.3145	61.0734
same_same	Cep192	ENSMUSG00000024542	-0.164299	1.23e-05	-0.142075	3.81e-05	129.822	134.283	131.306	113.968	119.167	119.693	122.145	116.417	119.665	126.519	117.609	119.409	363.537
same_same	Hnrnph1	ENSMUSG00000007850	0.176072	1.26e-05	0.204309	4.62e-07	222.431	214.082	220.082	251.042	253.214	237.765	252.971	254.488	249.087	228.402	247.341	252.182	727.925
same_same	Lmnb1	ENSMUSG00000024590	-0.193544	1.26e-05	-0.334048	1.59e-10	130.225	128.115	130.099	113.223	116.829	109.826	104.17	100.393	103.495	123.813	113.293	102.686	339.791
same_same	Bcl2	ENSMUSG00000057329	-0.252159	1.26e-05	0.0740347	0.111788	40.8011	40.4777	40.9365	33.8378	35.0317	33.7981	42.4039	44.4119	41.9134	38.4174	34.2225	42.9097	115.55
down_same	Hacd4	ENSMUSG00000028497	-0.512529	1.26e-05	-0.449501	2.23e-05	10.1196	9.80889	10.6686	7.2062	7.09987	7.10571	8.22908	7.07966	7.05716	9.2279	7.13726	7.4553	23.8205
same_same	Rcc2	ENSMUSG00000040945	-0.151847	1.27e-05	-0.306309	5.38e-12	365.073	367.898	367.608	324.161	332.546	333.895	293.02	300.108	296.922	353.222	330.201	296.683	980.106
same_same	Sec63	ENSMUSG00000019802	0.156804	1.27e-05	0.164821	2.15e-06	106.034	107.983	107.7	119.216	122.568	116.968	122.92	117.902	119.726	111.633	119.584	120.183	351.4
up_down	Rhob	ENSMUSG00000054364	2.76879	1.27e-05	0.962651	0.176818	0.201586	0.0428336	0.144823	1.01827	1.06285	0.699526	0.322709	0.13814	0.306833	0.401974	0.926882	0.255894	1.58475
same_same	Cldn11	ENSMUSG00000037625	-0.17994	1.28e-05	-0.468223	1.27e-14	645.964	635.993	620.951	559.498	540.993	579.244	469.8	438.283	467.43	605.481	559.912	458.504	1623.9
same_same	Mvd	ENSMUSG00000006517	-0.241701	1.28e-05	-0.429025	9.2e-11	115.67	116.55	114.651	97.127	92.851	103.088	85.292	83.1255	89.1043	109.443	97.6887	85.8406	292.972
same_same	Arl5c	ENSMUSG00000038352	-0.411376	1.28e-05	-0.535252	4.46e-08	15.6431	16.3196	16.027	11.3968	11.0112	13.5119	11.2948	10.6713	11.1074	14.5811	11.9733	11.0245	37.5789
same_up	Narf	ENSMUSG00000000056	-0.496357	1.28e-05	0.0856512	0.338519	9.71647	9.72322	9.41348	7.01038	6.67473	6.77435	9.9717	10.6022	10.0948	8.71569	6.81982	10.2229	25.7584
same_same	Galc	ENSMUSG00000021003	-0.377471	1.31e-05	-0.567608	3.06e-09	25.3999	25.7001	24.5716	21.4228	18.4937	18.3718	16.8777	16.0933	18.0418	23.8982	19.4294	17.0042	60.3318
same_same	Tbpl1	ENSMUSG00000071359	0.2345	1.32e-05	0.205769	3.13e-05	47.1309	47.0741	50.2052	56.9446	58.7971	54.1212	55.99	56.4646	53.9413	51.408	56.621	55.4653	163.494
same_same	Atp6v0a1	ENSMUSG00000019302	0.218979	1.33e-05	0.0631812	0.144588	224.648	219.822	213.855	260.872	252.917	252.676	224.864	235.528	227.701	231.516	255.488	229.364	716.369
same_same	Mms22l	ENSMUSG00000045751	-0.258818	1.33e-05	-0.439848	2.35e-10	42.4138	45.0609	41.7572	35.7568	33.9688	38.1426	31.6255	32.0484	31.6652	40.8583	35.9561	31.7797	108.594
same_same	Flvcr1	ENSMUSG00000066595	-0.246269	1.34e-05	-0.579812	1.7e-13	93.7377	96.7182	101.617	82.9496	83.2853	79.8196	64.2191	64.1313	66.7362	93.7617	82.0181	65.0289	240.809
same_same	Eif4a2	ENSMUSG00000022884	0.211009	1.36e-05	0.113562	0.00681268	130.426	140.28	139.899	155.951	164.998	154.264	146.8	154.924	142.432	145.377	158.404	148.052	451.833
same_same	Lrrc41	ENSMUSG00000028703	0.202474	1.36e-05	0.296491	3.8e-09	69.507	71.8319	69.0322	81.7747	80.4794	79.8932	84.8079	86.9934	86.6497	74.2129	80.7157	86.1503	241.079
same_same	Nop14	ENSMUSG00000036693	0.181314	1.36e-05	0.0432547	0.228696	75.1514	74.4876	73.4734	84.7511	86.4313	82.0654	77.192	75.9423	76.831	77.5707	84.416	76.6551	238.642
same_same	Cd300a	ENSMUSG00000034652	0.212008	1.4e-05	-0.120392	0.00503068	94.1006	87.3805	94.1348	100.103	105.478	113.36	82.4521	84.2306	86.7417	93.8729	106.314	84.4748	284.661
same_same	Psmd7	ENSMUSG00000039067	0.157219	1.43e-05	0.183376	4.18e-07	116.235	110.982	110.065	124.816	125.927	125.62	126.76	127.365	129.085	115.288	125.454	127.736	368.479
same_same	Crocc	ENSMUSG00000040860	-0.455296	1.44e-05	-0.252509	0.00358944	13.2241	12.8072	13.1789	9.79103	9.99083	8.87293	10.4558	11.3274	11.138	11.9257	9.5516	10.9738	32.4511
same_same	Otud7b	ENSMUSG00000038495	0.160887	1.45e-05	0.0913734	0.00441922	105.228	103.914	97.9967	115.691	116.659	111.519	107.333	109.786	110.429	105.867	114.623	109.183	329.673
same_same	Gramd1a	ENSMUSG00000001248	0.234306	1.45e-05	0.298655	7.11e-08	68.2975	70.7611	66.9564	81.0305	83.3703	78.2364	83.7107	86.7517	83.1518	72.916	80.8791	84.538	238.333
down_same	Rgs2	ENSMUSG00000026360	-0.516034	1.45e-05	-0.97872	4.75e-11	17.4574	21.631	18.1994	12.2584	14.7099	13.1805	9.26174	10.4986	9.35841	17.3629	13.3829	9.70626	40.4521
same_same	Ezr	ENSMUSG00000052397	0.281411	1.47e-05	0.132001	0.0176012	49.6306	49.1301	47.888	56.5138	64.1114	58.0238	53.376	54.0471	53.4196	51.1773	59.5497	53.6143	164.341
same_same	Khsrp	ENSMUSG00000007670	-0.152707	1.48e-05	-0.364709	1.19e-13	256.821	262.484	261.888	241.838	235.401	225.542	204.017	202.962	199.687	255.403	234.26	202.222	691.886
same_same	Epg5	ENSMUSG00000039840	-0.236026	1.48e-05	-0.165119	0.000489797	47.0503	49.8583	50.3018	40.8482	41.6214	42.3397	41.339	46.0696	43.8158	47.0027	41.6031	43.7414	132.347
same_same	Pclaf	ENSMUSG00000040204	-0.163269	1.5e-05	-0.3415	2.58e-12	92.6088	92.8203	94.7623	80.7564	84.7308	84.6426	74.0617	73.0068	73.9468	89.4464	83.3766	73.6718	246.495
same_same	Actr3	ENSMUSG00000026341	0.170873	1.51e-05	0.125045	0.000437104	250.491	256.273	259.667	284.606	298.79	279.442	272.205	274.932	288.515	266.849	287.612	278.551	833.012
same_same	Arf6	ENSMUSG00000044147	0.149972	1.52e-05	0.0673696	0.0232846	131.918	137.581	136.857	149.646	149.692	151.355	141.637	140.074	143.874	141.362	150.231	141.862	433.454
same_same	Trim41	ENSMUSG00000040365	0.231321	1.52e-05	0.0678968	0.148224	32.1329	31.0115	31.0886	35.0127	38.0502	37.6639	33.4649	32.4283	32.9232	32.3709	36.9089	32.9388	102.219
up_same	Rasgrp4	ENSMUSG00000030589	0.5598	1.52e-05	0.984493	2.27e-11	5.72506	5.05436	4.92397	8.06781	8.33278	6.92162	10.0362	11.0166	10.1869	6.01538	7.77407	10.4132	24.2027
same_same	H1f10	ENSMUSG00000044927	-0.492406	1.53e-05	-0.437908	2.23e-05	12.8209	12.5074	13.372	10.1435	8.63038	8.68885	9.4231	9.6007	9.51183	12.0076	9.15424	9.51188	30.6737
same_same	Ahcyl2	ENSMUSG00000029772	0.194786	1.54e-05	0.183699	1.4e-05	98.5355	96.6754	92.1072	113.184	111.132	105.039	107.72	108.06	110.828	100.656	109.785	108.869	319.31
same_same	Tlk2	ENSMUSG00000020694	0.256876	1.54e-05	0.191428	0.000290808	30.0364	32.5107	31.7162	37.2059	40.3885	35.1972	34.8848	36.2617	36.3904	33.8109	37.5972	35.8456	107.254
same_same	Akirin1	ENSMUSG00000023075	0.210319	1.55e-05	0.132096	0.00186144	61.242	60.8665	62.1289	73.0019	73.0394	67.2649	65.9294	68.3446	67.5953	65.3324	71.1021	67.2898	203.724
same_same	Vps26c	ENSMUSG00000022898	-0.232445	1.58e-05	-0.328912	1.16e-08	56.0007	54.4415	51.75	45.9003	46.8506	45.5796	43.0816	42.3743	43.8158	50.6973	46.1102	43.0906	139.898
same_same	Samd8	ENSMUSG00000021770	-0.204351	1.62e-05	-0.156976	0.000207148	109.139	102.929	108.617	95.9912	92.5534	89.8338	97.5872	94.971	95.0262	102.512	92.7928	95.8615	291.167
same_same	Hsp90aa1	ENSMUSG00000021270	0.182259	1.63e-05	0.100436	0.00651368	344.31	327.505	336.713	374.213	402.354	367.987	359.691	361.339	360.253	346.144	381.518	360.428	1088.09
same_same	Fam214b	ENSMUSG00000036002	0.367519	1.63e-05	0.676149	1.32e-11	15.8044	16.7479	16.365	21.2269	21.4697	20.4335	25.8813	27.8006	24.5773	18.1133	21.0434	26.0864	65.243
up_down	Grasp	ENSMUSG00000000531	1.28399	1.63e-05	0.401017	0.15992	1.1692	0.813838	0.91721	2.34985	2.50834	2.28266	0.903585	1.41593	1.53417	1.3603	2.38028	1.28456	5.02514
same_same	Slc2a3	ENSMUSG00000003153	-0.189289	1.64e-05	-0.154091	0.000104534	111.477	112.181	109.003	96.5004	93.2761	101.799	101.524	101.671	96.0081	105.895	97.192	99.7344	302.821
same_same	Eif1a	ENSMUSG00000057561	0.164686	1.69e-05	0.0853367	0.00987792	133.773	140.494	140.43	150.351	159.556	154.853	148.704	146.808	144.304	143.758	154.92	146.605	445.283
same_same	Nck1	ENSMUSG00000032475	0.229448	1.72e-05	-0.0294708	0.54508	34.1891	36.3657	35.7712	42.2972	43.3645	39.0998	35.0139	35.1911	33.9357	38.1447	41.5872	34.7136	114.445
same_same	Sp1	ENSMUSG00000001280	0.163298	1.73e-05	-0.0954841	0.00424173	162.761	169.321	172.87	187.087	194.12	184.159	160.709	153.611	157.988	176.426	188.455	157.436	522.318
same_same	Slc16a3	ENSMUSG00000025161	0.184483	1.74e-05	0.448173	7.14e-14	174.735	178.445	172.773	199.659	196.203	201.832	227.413	242.608	247.614	183.626	199.231	239.212	622.068
same_same	Ppp2r5a	ENSMUSG00000026626	0.18198	1.74e-05	0.191757	2.93e-06	107.889	109.054	114.844	122.74	128.01	125.399	123.307	126.985	128.318	115.546	125.383	126.203	367.133
same_same	Blzf1	ENSMUSG00000026577	0.23029	1.74e-05	0.205907	2.95e-05	31.6491	29.9835	30.6541	36.4226	36.9023	35.0867	35.3689	34.8457	36.237	32.3534	36.1372	35.4839	103.975
same_same	Syvn1	ENSMUSG00000024807	0.27723	1.76e-05	-0.0113897	0.854339	59.3874	59.196	57.8808	71.7878	67.1724	74.702	58.5717	57.6733	58.8813	62.9549	71.2207	58.3754	192.551
same_same	Ttf2	ENSMUSG00000033222	-0.226107	1.77e-05	-0.315211	1.89e-08	80.4733	77.7001	79.8456	67.5189	67.2149	68.7008	64.0577	63.5097	63.7292	75.0215	67.8115	63.7655	206.599
same_same	Pygb	ENSMUSG00000033059	-0.225956	1.82e-05	-0.221297	8.05e-06	62.4918	61.7232	64.6392	54.8689	51.9948	54.3789	55.6996	52.5621	53.5731	60.4104	53.7476	53.9449	168.103
same_same	Hax1	ENSMUSG00000027944	0.236349	1.82e-05	0.371939	1.04e-09	48.0179	48.7446	44.0261	55.1039	53.908	57.0298	61.476	60.5052	60.5689	49.2915	55.3472	60.85	165.489
same_same	Il10rb	ENSMUSG00000022969	-0.263394	1.87e-05	-0.451853	3.09e-10	35.8824	36.794	34.9023	28.394	31.333	30.0428	26.2362	25.9357	26.5104	33.3634	29.9232	26.2274	89.5141
same_same	Ptprc	ENSMUSG00000026395	0.181525	1.88e-05	0.200527	1.86e-06	389.505	404.82	399.759	441.967	478.285	434.074	460.506	464.667	446.964	415.515	451.442	457.379	1324.34
same_same	Specc1	ENSMUSG00000042331	0.16913	1.88e-05	0.115043	0.00105366	156.592	152.702	154.429	171.735	176.859	172.93	161.161	168.15	172.9	159.622	173.841	167.404	500.867
up_same	Gpr35	ENSMUSG00000026271	0.947028	1.88e-05	1.32613	4.51e-09	1.53206	2.01318	1.93097	3.13313	4.03885	3.38718	3.61434	4.97303	5.09343	2.35909	3.51972	4.56027	10.4391
same_same	Zfp710	ENSMUSG00000048897	0.197069	1.9e-05	0.318569	8.74e-10	118.936	125.031	116.824	137.858	135.663	140.126	147.801	147.395	154.797	126.571	137.882	149.998	414.451
same_same	Amdhd2	ENSMUSG00000036820	-0.373909	1.9e-05	-0.612154	9.87e-10	21.2472	22.5305	20.0821	16.9972	14.8375	17.3777	13.4892	14.7809	13.6234	19.8699	16.4041	13.9645	50.2386
same_same	BC017158	ENSMUSG00000030780	-0.353889	1.91e-05	-0.383442	1.64e-06	20.3602	19.9176	19.889	15.8615	16.2404	15.0582	15.5868	15.5407	15.0348	18.556	15.72	15.3875	49.6635
same_same	Tbc1d4	ENSMUSG00000033083	-0.338284	1.93e-05	-0.220585	0.00112	17.6993	18.7611	18.9718	14.7257	13.7746	15.2055	16.4904	15.817	15.2189	17.4862	14.5686	15.8421	47.8969
same_same	St3gal6	ENSMUSG00000022747	0.309633	1.95e-05	0.738997	3.73e-14	41.8494	41.3772	41.902	55.4564	48.9338	50.5868	67.8979	70.1059	70.8171	46.2452	51.659	69.607	167.511
same_same	Serinc2	ENSMUSG00000023232	0.481932	1.97e-05	0.196424	0.045528	7.57965	8.56671	8.0618	11.0834	11.6064	11.1188	9.26174	8.97908	9.45046	9.23732	11.2695	9.23043	29.7373
up_same	Ifi204	ENSMUSG00000073489	0.53231	1.97e-05	0.438843	0.000106559	6.16855	6.42504	6.1791	8.89025	9.18306	9.09383	9.03585	8.49559	7.94698	7.1648	9.05572	8.4928	24.7133
same_same	Rasa1	ENSMUSG00000021549	0.212828	2e-05	0.0936624	0.028781	99.1805	99.8879	100.121	115.26	121.633	110.157	100.911	112.238	106.226	105.09	115.683	106.458	327.231
same_same	Bri3	ENSMUSG00000047843	-0.340151	2.01e-05	-0.715782	5.61e-12	34.3907	36.1087	34.4195	25.7308	27.4642	29.601	19.7175	23.8291	20.4965	32.0863	27.5987	21.3477	81.0327
same_same	Mex3c	ENSMUSG00000037253	0.239377	2.02e-05	0.125266	0.00974627	69.4667	67.7627	73.9079	82.5579	88.4295	78.3101	74.4489	76.0804	79.3777	74.7428	83.0992	76.6357	234.478
same_same	Fam133b	ENSMUSG00000058503	0.20812	2.02e-05	0.218757	2.89e-06	37.4951	37.6079	39.0056	43.9421	45.4477	42.4502	44.2757	42.8233	45.4727	40.1852	43.9467	44.1905	128.322
same_same	Dsn1	ENSMUSG00000027635	-0.324052	2.05e-05	-0.528655	1.1e-09	33.3424	31.9967	32.5851	25.1042	26.4863	26.6556	23.3964	21.6879	22.767	29.8953	26.082	22.6171	78.5945
same_same	Polr3g	ENSMUSG00000035834	0.308791	2.05e-05	0.174523	0.00549646	20.3602	19.5749	20.1786	23.0677	25.551	25.8456	23.2673	23.0348	21.601	20.9404	24.8214	22.6344	68.3962
same_same	Tlr6	ENSMUSG00000051498	-0.405539	2.05e-05	-0.0430815	0.593684	13.8288	14.1779	13.372	10.7701	10.7561	9.79336	13.6183	13.2614	13.3166	12.7733	10.4399	13.3988	36.612
same_same	Bin3	ENSMUSG00000022089	0.253994	2.06e-05	0.254328	6.74e-06	45.357	43.4332	43.6882	50.4042	52.505	55.0784	54.4733	51.4915	52.1309	45.8419	52.6626	52.6986	151.203
same_same	Plxnd1	ENSMUSG00000030123	-0.159387	2.07e-05	-0.11488	0.000659782	599.075	617.831	615.69	555.817	535.891	549.091	562.03	556.599	573.594	596.446	546.933	564.074	1707.45
same_same	Rap2c	ENSMUSG00000050029	0.263993	2.07e-05	0.298541	9.26e-07	55.7185	59.1532	60.4876	67.7147	78.2686	64.835	70.0924	73.0759	72.2285	62.4518	70.2728	71.7989	204.524
same_same	Ulk1	ENSMUSG00000029512	-0.316836	2.07e-05	-0.237093	0.000277428	23.7469	26.514	23.1234	19.6604	18.9188	20.3231	21.202	20.1684	20.926	23.0992	19.6341	20.7655	63.4988
same_same	Rin2	ENSMUSG00000001768	0.190709	2.15e-05	0.074378	0.0527711	52.1706	52.4283	54.2602	62.2318	59.2223	59.6806	57.0227	53.8745	56.1505	56.3068	60.3782	55.6825	172.367
same_same	Usp12	ENSMUSG00000029640	0.219685	2.15e-05	0.258938	4.48e-07	46.8084	49.9011	45.5709	57.4929	54.1631	54.158	56.8613	58.0877	55.5368	50.9883	55.2713	56.8286	163.088
same_down	Ndrg4	ENSMUSG00000036564	-0.245014	2.15e-05	-1.18994	2.4e-20	67.975	70.0757	71.639	55.1431	59.3498	62.1842	32.6259	28.9057	30.2231	65.6192	58.8923	30.5849	155.096
same_same	Rpf2	ENSMUSG00000038510	0.292734	2.15e-05	0.265648	2.94e-05	27.0126	28.0132	26.3095	33.5636	34.5215	31.7732	31.8191	30.8397	35.0403	29.2954	33.2861	32.5664	95.1479
same_down	St18	ENSMUSG00000033740	0.371535	2.15e-05	-0.841862	1.31e-11	22.4971	27.3278	25.5853	30.1955	33.8413	33.3563	14.1669	13.5722	14.2064	27.7029	32.4644	13.9818	74.1491
same_same	Rragc	ENSMUSG00000028646	-0.161917	2.16e-05	-0.452581	5.17e-15	201.224	200.161	215.351	188.458	183.236	179.299	149.253	149.26	151.852	201.323	183.664	150.121	535.109
same_same	Car5b	ENSMUSG00000031373	0.19599	2.21e-05	0.498924	1.64e-14	70.8778	72.9027	70.8183	83.6937	81.7973	80.4086	102.363	100.255	100.672	75.8049	81.9665	101.097	258.868
same_same	Atp8b2	ENSMUSG00000060671	0.184697	2.21e-05	0.364191	9.86e-12	71.8454	76.4151	73.0872	82.323	85.7086	83.6117	93.6501	94.2458	96.9286	77.2751	83.8811	94.9415	256.098
same_same	Prkx	ENSMUSG00000035725	0.19044	2.21e-05	0.308669	9e-10	71.6842	71.8319	74.8251	85.8086	84.9859	78.3837	91.3589	89.5145	89.3498	77.4885	83.0594	90.0744	250.622
same_same	Ptpra	ENSMUSG00000027303	-0.136041	2.23e-05	-0.218029	1.88e-09	254.483	246.85	247.019	228.209	231.787	221.271	215.666	211.388	216.379	240.693	227.089	214.478	682.26
same_same	Coq10b	ENSMUSG00000025981	0.35796	2.23e-05	0.128998	0.0771769	14.1917	14.2636	15.2064	17.2714	19.344	19.2554	15.9418	15.8515	15.8633	15.5804	18.6236	15.8855	50.0895
same_same	Clspn	ENSMUSG00000042489	-0.197025	2.24e-05	-0.528087	1.63e-14	95.1085	97.018	97.0312	83.6545	83.4553	85.0108	69.6728	66.307	64.527	92.5679	84.0402	66.8356	243.444
same_same	Cdc25b	ENSMUSG00000027330	-0.270814	2.24e-05	-0.290355	2.63e-06	80.3524	85.8385	80.9559	68.8505	69.1706	66.9336	68.9629	69.0698	64.2202	78.5483	68.3182	67.4176	214.284
same_same	Rhoj	ENSMUSG00000046768	0.355024	2.24e-05	0.678653	1.04e-11	25.8434	27.4563	26.6474	32.7412	35.3293	34.2031	40.9518	42.2707	44.6135	28.9483	34.0912	42.612	105.652
same_same	Epb41	ENSMUSG00000028906	-0.149683	2.3e-05	-0.0603235	0.0453534	163.567	168.122	161.332	142.91	151.606	150.067	154.707	156.478	161.67	157.455	148.194	157.618	463.267
same_same	Myl6	ENSMUSG00000090841	0.263986	2.31e-05	0.448477	3.83e-10	104.785	92.2635	89.2108	108.132	110.92	125.031	130.762	131.336	129.361	96.5355	114.694	130.486	341.716
same_same	Cc2d1b	ENSMUSG00000028582	-0.209493	2.31e-05	-0.245495	5.89e-07	55.0331	52.9423	52.6672	44.3338	48.3811	46.4264	44.8565	46.7603	44.0919	49.9811	46.3804	45.2362	141.598
same_same	Rad51	ENSMUSG00000027323	-0.211572	2.41e-05	-0.358801	5.48e-10	55.6379	54.1845	58.3153	47.8585	47.6584	49.4454	44.3725	42.3743	44.1533	53.4528	48.3208	43.6334	145.407
same_same	Spty2d1	ENSMUSG00000049516	0.253938	2.41e-05	0.240807	1.74e-05	35.963	35.2092	38.1849	43.4722	45.0225	41.8611	41.694	42.6161	44.6442	38.9554	43.4519	42.9848	125.392
same_same	Tut7	ENSMUSG00000035248	0.151146	2.42e-05	0.148743	1.14e-05	87.7708	87.9802	88.8729	100.417	98.8455	94.6569	98.5553	98.3554	96.4376	92.4233	97.973	97.7828	288.179
same_same	Arid5b	ENSMUSG00000019947	-0.314346	2.44e-05	0.0119296	0.858163	37.737	39.0214	36.9781	32.7804	29.6324	29.1224	39.79	37.1596	37.7712	36.2599	30.5117	38.2402	105.012
same_same	Usp9x	ENSMUSG00000031010	0.162425	2.45e-05	0.110569	0.0013118	291.938	301.891	298.769	333.482	335.99	329.477	327.872	314.095	321.622	311.381	332.983	321.197	965.56
same_down	Tef	ENSMUSG00000022389	-0.24583	2.47e-05	-1.19039	3.53e-20	58.702	58.0823	59.2325	46.9969	52.3775	49.1877	27.2689	25.2105	24.6387	54.7706	49.5207	25.706	129.997
same_same	Gm42793	ENSMUSG00000105954	0.436315	2.47e-05	0.868304	3.15e-12	18.1428	20.6458	18.0546	27.2582	27.0815	22.8634	33.7553	34.673	35.4085	21.9862	25.7344	34.6123	82.3329
up_same	Ankrd37	ENSMUSG00000050914	1.08621	2.47e-05	0.824343	0.000465074	1.00793	0.942339	1.25513	1.91904	2.46582	2.39311	1.549	2.31384	1.81032	1.37217	2.25933	1.89105	5.52255
same_same	Lcp1	ENSMUSG00000021998	0.129113	2.48e-05	0.171367	1.07e-07	2006.99	2026.46	1970.36	2179.84	2231.61	2154.54	2221.43	2229.61	2310.02	2058.88	2188.66	2253.69	6501.23
same_same	C3	ENSMUSG00000024164	-0.157643	2.51e-05	-0.236549	8.06e-09	155.423	156.171	151.243	138.249	139.787	137.07	128.47	128.504	135.866	148.555	138.369	130.947	417.87
same_same	Hexim1	ENSMUSG00000048878	0.162652	2.51e-05	0.0732167	0.027288	90.472	97.3179	93.3141	102.923	106.158	105.518	97.5872	97.8374	100.181	97.8517	104.866	98.5352	301.253
same_same	Smap2	ENSMUSG00000032870	0.206024	2.54e-05	0.286378	2.43e-08	56.5652	52.5996	50.4466	61.566	61.2204	61.7055	64.4772	63.6478	66.8589	54.8707	61.4973	64.9947	181.363
down_same	Creg2	ENSMUSG00000050967	-0.777017	2.57e-05	-0.879291	1.19e-06	5.92664	5.91103	5.11707	2.624	3.95382	3.38718	3.35617	3.24628	2.66945	4.5507	3.32166	3.09063	10.963
same_same	Rbm8a	ENSMUSG00000038374	0.205287	2.58e-05	0.0943327	0.0246989	85.5533	80.4843	77.1422	88.8242	96.0821	95.9455	86.3892	85.1631	88.3986	82.1502	93.6172	86.6503	262.418
same_same	Cdkn2c	ENSMUSG00000028551	-0.220132	2.58e-05	-0.37678	5.18e-10	62.9353	63.6079	68.1149	55.378	57.1816	54.4157	49.1163	49.5576	50.965	62.3669	55.6585	49.8796	167.905
same_same	Rock2	ENSMUSG00000020580	0.217891	2.62e-05	0.171082	0.00028785	171.268	186.283	178.18	210.742	223.412	189.314	198.692	201.995	202.387	191.735	207.823	201.025	600.582
same_same	Txnl1	ENSMUSG00000024583	0.153432	2.62e-05	-0.0110634	0.74851	131.717	129.357	136.375	149.529	150.84	141.672	131.439	130.266	132.491	138.42	147.347	131.399	417.166
down_same	Airn	ENSMUSG00000078247	-0.593338	2.62e-05	-0.919126	6.07e-09	13.7079	15.0346	14.3857	9.32106	9.01301	10.1615	8.6486	8.21931	6.01393	12.9138	9.49853	7.62728	30.0396
same_same	Alg10b	ENSMUSG00000075470	0.159701	2.69e-05	0.164166	7.39e-06	145.868	154.372	148.878	166.917	173.033	161.922	165.13	169.705	168.39	156.722	167.291	167.742	491.755
same_same	Usp54	ENSMUSG00000034235	0.315006	2.69e-05	0.103369	0.111822	17.659	19.9176	18.6821	22.8327	24.2331	22.9371	20.4275	19.6504	20.2817	20.4775	23.3343	20.1198	63.9316
same_same	Colgalt1	ENSMUSG00000034807	-0.154547	2.71e-05	-0.240727	4.31e-09	202.514	207.443	204.152	186.617	180.898	184.123	179.329	168.15	172.164	199.404	183.879	173.215	556.498
same_down	Hvcn1	ENSMUSG00000064267	-0.250583	2.71e-05	-0.953531	9.83e-18	69.7489	64.7215	69.2252	58.3154	55.1834	57.582	36.9824	34.7767	33.4448	64.0874	57.0269	35.068	156.182
same_same	Pak1ip1	ENSMUSG00000038683	0.193489	2.73e-05	0.0980197	0.0136796	57.3312	57.397	56.7222	64.3075	67.3	64.6141	60.8306	59.7799	62.8394	59.4756	65.4072	61.15	186.033
same_same	Rassf3	ENSMUSG00000025795	-0.213605	2.73e-05	-0.126546	0.00371627	66.9267	60.5238	65.8461	55.378	53.9505	57.2138	58.8621	58.6057	59.5563	60.5826	55.5141	59.008	175.105
same_same	Pak2	ENSMUSG00000022781	0.154369	2.76e-05	0.166086	4.24e-06	272.867	282.273	282.935	307.36	320.94	304.441	309.123	311.298	319.751	290.856	310.913	313.39	915.16
same_same	Arrdc4	ENSMUSG00000042659	-0.350134	2.76e-05	-0.187892	0.00699166	19.9974	20.3459	19.6959	15.4307	14.5824	16.9727	18.2976	17.7509	16.7224	18.4908	15.6619	17.5903	51.7431
same_same	Gskip	ENSMUSG00000044715	0.31006	2.76e-05	0.204027	0.00171429	16.006	14.0066	14.9167	18.368	18.7062	18.7031	17.2649	16.7149	17.7963	15.7638	18.5924	17.2587	51.6149
up_down	Ocstamp	ENSMUSG00000027670	2.54556	2.76e-05	0.739049	0.311388	0.0403173	0.171334	0.0965485	0.548298	0.850284	0.478623	0.161354	0.207209	0.153417	0.27206	0.625735	0.173993	1.07179
down_same	Ankrd55	ENSMUSG00000049985	-0.543945	2.77e-05	-0.422392	0.000200095	9.35361	9.12355	8.73764	5.60047	6.33461	6.73754	6.90597	7.07966	6.38213	7.82055	6.22421	6.78925	20.834
down_same	Cplane2	ENSMUSG00000073733	-0.867028	2.77e-05	-1.08909	2.81e-07	3.30602	3.29818	4.24813	2.03653	1.61554	2.20903	1.51673	1.65768	1.87168	3.19428	1.9537	1.68203	6.83001
same_same	Dock5	ENSMUSG00000044447	-0.164787	2.81e-05	-0.0171305	0.630702	120.266	120.234	118.32	107.975	106.541	105.665	118.144	121.563	115.093	115.51	106.727	118.267	340.503
same_same	Mt1	ENSMUSG00000031765	0.280136	2.83e-05	0.453503	2.33e-09	359.832	329.904	326.189	392.229	380.332	461.024	462.474	472.61	456.414	349.441	411.195	463.833	1224.47
same_same	Fancm	ENSMUSG00000055884	-0.29147	2.84e-05	-0.363038	2.69e-07	29.7542	31.7397	30.8955	26.5924	25.1259	23.7839	25.3004	23.6564	22.8591	29.7425	25.1674	23.9386	78.8486
same_same	Arfgef2	ENSMUSG00000074582	-0.20383	2.93e-05	-0.247131	4.67e-07	80.7959	78.7281	74.8251	69.4771	67.2149	67.044	66.3812	65.9617	65.3861	74.3434	67.912	65.9097	208.165
same_same	Acot9	ENSMUSG00000025287	0.216441	2.93e-05	0.403574	4.34e-11	38.4627	40.5206	41.9503	45.5479	48.4237	46.3896	55.1187	50.6627	53.7878	42.6729	46.787	53.1897	142.65
same_same	St8sia4	ENSMUSG00000040710	-0.219725	2.98e-05	-0.128712	0.005188	258.918	265.911	280.908	236.865	232.298	222.523	249.164	242.262	245.129	261.228	230.562	245.518	737.308
same_same	Dock11	ENSMUSG00000031093	0.178269	2.98e-05	-0.0347461	0.362262	107.042	107.17	105.914	117.766	126.055	118.698	108.075	104.226	100.334	110.283	120.84	104.212	335.335
same_same	Myh9	ENSMUSG00000022443	0.154417	2.99e-05	0.138847	6.58e-05	1107.11	1103.95	1070.82	1240.17	1236.06	1176.57	1162.66	1239.98	1210.92	1138.31	1217.6	1204.52	3560.43
same_same	Plekhj1	ENSMUSG00000035278	0.24906	3e-05	0.309091	2.49e-07	35.9227	34.3954	33.0196	42.4931	41.0687	39.5416	39.8545	44.3774	44.0612	36.636	41.0345	42.7644	120.435
same_same	Raph1	ENSMUSG00000026014	-0.287249	3.07e-05	-0.303846	4.24e-06	51.8884	49.4299	49.0949	43.3547	41.4938	38.658	44.1143	40.7857	37.1882	47.2932	41.1688	40.6961	129.158
same_same	Gzf1	ENSMUSG00000027439	-0.189791	3.09e-05	-0.057545	0.133029	62.9353	63.4794	65.3633	56.5138	53.8655	57.4716	61.4115	59.4346	63.1769	61.7855	55.9503	61.341	179.077
same_same	Abca2	ENSMUSG00000026944	-0.238077	3.09e-05	-0.327048	5.12e-08	55.3153	59.2388	55.805	49.5818	46.6381	48.1568	46.9219	43.9284	44.9204	54.8752	48.1255	45.2569	148.258
same_same	B4galnt1	ENSMUSG00000006731	0.1635	3.1e-05	0.281516	4.61e-10	105.631	105.756	106.686	118.667	119.337	118.22	124.888	130.335	131.325	110.37	118.741	128.849	357.96
same_same	Trp53	ENSMUSG00000059552	-0.15241	3.11e-05	-0.0969915	0.00245002	128.128	130.428	124.885	116.67	113.003	115.385	119.241	117.764	121.567	123.995	115.019	119.524	358.538
same_same	Ndst2	ENSMUSG00000039308	-0.248607	3.12e-05	-0.240056	1.67e-05	53.4607	51.3575	52.2327	47.8585	43.5345	40.9407	45.2761	42.4089	45.2272	50.4829	44.1112	44.304	138.898
same_same	Arih1	ENSMUSG00000025234	0.141108	3.14e-05	-0.00520588	0.873914	205.336	210.698	211.586	229.11	236.591	226.425	207.082	208.522	209.628	217.131	230.709	208.411	656.251
same_same	Tbc1d13	ENSMUSG00000039678	-0.249443	3.15e-05	0.00335873	0.959453	40.0351	39.1499	37.5091	33.2112	31.8856	33.1354	41.0486	37.9539	38.1087	36.6234	32.7441	39.037	108.404
same_same	Klf13	ENSMUSG00000052040	0.173654	3.19e-05	0.0122036	0.756946	68.1362	70.8039	68.7425	77.075	79.2039	78.0155	69.5438	69.4842	70.3875	72.2071	78.0981	69.8052	220.11
same_same	Adam17	ENSMUSG00000052593	-0.147855	3.2e-05	-0.326401	2.96e-12	440.426	442.385	449.916	402.764	406.351	393.796	353.657	348.319	360.805	431.688	400.97	354.26	1186.92
same_same	Eif3a	ENSMUSG00000024991	0.154044	3.22e-05	-0.0386557	0.237569	605.969	601.683	593.194	659.876	697.955	646.141	585.813	587.542	579.945	618.251	667.991	584.434	1870.68
same_same	Naa15	ENSMUSG00000063273	0.145027	3.22e-05	0.0910226	0.00322199	218.157	219.736	221.048	242.308	251.386	235.077	234.125	233.836	233.837	227.697	242.924	233.933	704.554
same_same	Thoc1	ENSMUSG00000024287	0.231297	3.22e-05	0.0287582	0.574165	49.7515	52.5568	49.819	59.7253	63.6863	55.5571	50.4071	52.9075	51.9468	54.0337	59.6562	51.7538	165.444
same_same	Tnfsf9	ENSMUSG00000035678	-0.267926	3.24e-05	-0.22077	0.000134601	40.9624	38.4645	38.378	32.3496	30.3551	35.0131	34.5621	32.4283	34.1505	36.3974	32.5726	33.7136	102.684
same_same	Rbm12	ENSMUSG00000089824	0.262414	3.28e-05	-0.140758	0.0127376	24.1097	25.486	24.5716	29.7647	30.3126	28.9383	21.6538	23.3456	22.3068	26.6074	29.6719	22.4354	78.7147
same_same	1810055G02Rik	ENSMUSG00000035372	0.272088	3.28e-05	0.271612	1.08e-05	20.4812	23.5585	21.6269	26.3183	26.7414	26.2138	26.3976	25.9703	26.8172	23.8345	26.4245	26.395	76.6541
up_down	8030451A03Rik	ENSMUSG00000073821	0.772179	3.28e-05	0.268247	0.112295	2.37872	2.52718	2.26889	4.38638	4.16639	3.75535	2.80757	3.10814	2.7615	3.06082	4.10271	2.8924	10.0559
same_same	Ampd2	ENSMUSG00000027889	0.159322	3.34e-05	0.116009	0.000789278	175.743	173.99	170.263	193.314	194.332	193.253	187.687	188.802	187.23	179.189	193.633	187.906	560.729
same_same	Slc28a2	ENSMUSG00000027219	-0.208135	3.38e-05	-0.503137	3.88e-13	90.0688	95.5617	90.0797	80.5997	83.2428	75.1438	65.6067	65.789	63.2383	88.747	79.6621	64.878	233.287
same_same	Blvrb	ENSMUSG00000040466	0.247017	3.38e-05	0.405282	1.13e-09	62.1693	55.3838	59.329	68.8113	67.3	73.6711	78.4183	76.6675	79.2243	61.1747	69.9275	78.1034	209.206
same_same	Btg2	ENSMUSG00000020423	0.333299	3.42e-05	0.804705	4.1e-14	18.9894	16.6623	17.2822	23.381	21.4697	21.943	31.7223	29.6655	31.2049	19.1085	22.2646	30.8642	72.2373
same_same	Bcl3	ENSMUSG00000053175	0.465574	3.44e-05	0.259252	0.00856884	9.15203	8.43821	7.72388	12.3759	11.4363	11.3029	9.90716	9.77338	10.7085	9.51265	11.705	10.1297	31.3473
down_down	Cd28	ENSMUSG00000026012	-0.83503	3.44e-05	-1.62371	3.05e-10	5.56379	5.65403	4.73087	3.13313	2.76342	3.05582	1.96852	1.62314	1.59553	4.50601	2.98412	1.72907	9.2192
same_same	Orc1	ENSMUSG00000028587	-0.315644	3.48e-05	-0.195692	0.00259663	22.8196	23.7298	23.413	20.287	17.3033	18.519	20.7825	20.5137	19.7907	22.4766	18.7031	20.3623	61.542
same_same	Blnk	ENSMUSG00000061132	-0.318605	3.54e-05	-0.444149	4.61e-08	16.3285	16.5766	16.6546	13.7858	13.0944	12.8492	11.4562	12.4326	12.5188	15.6723	13.2431	12.1358	41.0513
same_same	Exo1	ENSMUSG00000039748	-0.250816	3.56e-05	-0.593137	8.12e-13	36.0033	34.0955	35.8678	29.4906	28.9947	30.4846	22.7187	23.9672	23.5648	33.1513	29.6566	23.4169	86.2248
same_same	Nek9	ENSMUSG00000034290	-0.142867	3.61e-05	-0.0606355	0.0421065	209.771	204.744	207.627	187.4	186.255	189.792	201.177	193.948	201.344	199.924	187.816	198.823	586.563
same_same	Thap7	ENSMUSG00000022760	-0.302594	3.63e-05	-0.304529	1.01e-05	21.1666	20.7743	22.0131	17.3105	17.1332	17.3409	16.8454	16.9221	17.9191	20.0326	17.2615	17.2289	54.523
same_same	Gm26532	ENSMUSG00000097296	0.496503	3.63e-05	0.414872	0.000151228	6.04759	6.33937	6.3722	8.42028	8.54535	9.42519	8.4227	9.08268	7.54809	7.04395	8.79694	8.35116	24.192
same_same	Uso1	ENSMUSG00000029407	0.163763	3.66e-05	0.137181	0.000177517	213.037	215.196	213.034	239.645	240.503	238.244	237.869	235.597	231.812	222.625	239.464	235.093	697.182
same_same	Tirap	ENSMUSG00000032041	0.271445	3.66e-05	0.295092	3.13e-06	27.7786	30.1977	29.4956	35.3652	35.4993	34.6449	35.5625	34.0169	37.495	31.6861	35.1698	35.6915	102.547
same_same	R3hcc1l	ENSMUSG00000025184	0.227575	3.69e-05	0.155971	0.00138778	44.0265	40.9061	41.9503	50.4042	51.1021	47.3468	46.6314	46.7603	48.0501	44.4202	49.6177	47.1473	141.185
same_same	Sipa1l1	ENSMUSG00000042700	-0.335741	3.73e-05	0.0201728	0.781188	18.546	20.2603	20.3717	16.4098	15.2201	15.1687	19.9111	19.6504	20.3124	19.0139	15.5995	19.958	54.5714
same_same	Exosc3	ENSMUSG00000028322	0.264523	3.74e-05	0.234423	6.93e-05	26.5691	25.9571	28.1922	32.0754	31.7581	32.9145	30.3024	31.5994	32.8618	28.7416	32.2493	31.5879	92.5788
same_same	Esf1	ENSMUSG00000045624	0.248734	3.75e-05	0.0908863	0.0817476	50.8804	51.1433	53.343	58.1587	67.385	59.2388	54.6346	56.4991	54.2481	54.215	61.5942	55.1273	170.936
same_same	Rnf130	ENSMUSG00000020376	-0.153695	3.76e-05	-0.130512	0.000125114	94.0602	94.7479	97.3691	86.2002	84.9433	85.9312	88.519	85.4739	87.2326	92.7724	85.6916	87.0752	265.539
same_same	Limk2	ENSMUSG00000020451	0.261207	3.76e-05	0.362378	3.79e-08	33.6246	35.1664	35.7712	43.198	42.5142	39.5784	43.5657	45.2407	45.442	38.0452	41.7635	44.7495	124.558
same_same	Zfp335	ENSMUSG00000039834	0.290814	3.76e-05	0.256543	7.6e-05	36.0033	35.3805	33.7437	45.2345	42.9393	40.7198	41.8553	41.6146	42.2816	38.1196	42.9645	41.9172	123.001
same_same	Cd164	ENSMUSG00000019818	0.205152	3.79e-05	0.612139	1.27e-15	121.96	123.746	126.237	146.239	143.443	139.022	192.657	191.772	183.977	132.074	142.901	189.469	464.444
same_same	Itpr3	ENSMUSG00000042644	-0.171156	3.83e-05	-0.185894	4.1e-06	103.132	104.942	100.217	93.3281	90.1726	90.4229	89.4872	92.7608	89.0123	99.4959	91.3079	90.4201	281.224
same_same	Psmd12	ENSMUSG00000020720	0.176616	3.84e-05	0.190788	4.71e-06	104.099	101.344	101.376	112.753	121.463	112.918	114.788	116.106	119.358	105.158	115.712	116.751	337.62
same_same	Ier5	ENSMUSG00000056708	0.214287	3.89e-05	0.360321	1.15e-09	111.356	111.196	120.396	131.474	138.214	128.013	142.605	151.954	145.347	121.022	132.567	146.635	400.224
same_down	Fmn1	ENSMUSG00000044042	0.266681	3.89e-05	-0.279731	1.32e-05	103.374	106.698	98.576	124.738	127.585	119.545	81.839	86.6135	86.036	110.004	123.956	84.8295	318.79
same_same	Polr3d	ENSMUSG00000000776	0.224153	3.89e-05	0.146256	0.00224506	26.4481	27.7562	28.2404	31.0963	33.7563	31.4418	30.6896	30.5289	29.9162	29.031	32.0981	30.3782	91.5073
same_same	Hsd17b12	ENSMUSG00000027195	0.14457	3.9e-05	0.0883023	0.00452372	215.415	207.057	220.082	237.844	244.754	227.751	225.186	229.45	228.345	221.661	236.783	227.66	686.104
same_same	Arid1b	ENSMUSG00000069729	-0.181367	3.9e-05	-0.211598	1.33e-06	97.8098	102.115	98.576	90.9782	86.0912	86.1521	87.9704	86.6826	83.2131	97.2231	87.7405	85.9554	270.919
same_same	Rab33b	ENSMUSG00000027739	0.347453	3.91e-05	0.141918	0.0536962	14.9174	14.9489	16.365	19.6212	19.2589	19.7708	18.2976	16.9566	15.6792	16.9784	19.5503	16.9778	53.5065
same_same	Tars	ENSMUSG00000022241	0.153693	3.93e-05	0.0523761	0.107039	135.345	132.27	135.409	145.181	153.561	149.662	139.701	138.001	140.161	137.62	149.468	139.288	426.376
same_same	Pitpna	ENSMUSG00000017781	0.137939	3.94e-05	0.192847	6.23e-08	216.786	207.7	213.42	233.066	236.549	232.39	241.644	240.881	246.602	218.062	234.001	243.042	695.106
same_same	Nrbp1	ENSMUSG00000029148	0.233316	3.96e-05	0.255884	3.2e-06	44.1474	46.1318	47.5501	50.9917	57.0115	53.9371	54.1506	54.3579	55.7823	48.2245	53.9801	54.7636	156.968
same_same	Rfx1	ENSMUSG00000031706	0.279801	3.97e-05	-0.00672072	0.920887	23.9485	23.8583	23.5578	27.689	29.5048	29.4905	22.8478	24.9342	23.35	25.035	28.8948	23.7107	77.6405
same_same	Gdi1	ENSMUSG00000015291	0.252637	4e-05	0.360856	2.47e-08	45.1957	46.5173	41.8055	50.6784	53.3978	55.2257	57.184	59.0547	55.6595	46.3337	53.1006	57.2994	156.734
same_same	Ccnf	ENSMUSG00000072082	-0.254169	4e-05	-0.252643	1.47e-05	58.2988	59.6243	56.9636	50.3259	46.9782	49.2982	49.5358	48.1762	49.124	55.6379	48.8674	48.9453	153.451
same_same	Brip1	ENSMUSG00000034329	-0.244858	4e-05	-0.548749	3.27e-12	53.3398	52.8566	52.9086	45.6653	46.383	42.4133	37.4342	36.6761	34.7335	50.4768	44.8206	36.2813	131.579
same_same	Pogk	ENSMUSG00000040596	0.140405	4.05e-05	-0.0281626	0.358702	162.035	159.127	165.774	180.782	177.114	178.637	156.772	161.382	159.277	168.561	178.844	159.144	506.548
same_same	Arrb1	ENSMUSG00000018909	-0.156373	4.12e-05	-0.179558	2.16e-06	230.857	235.37	226.406	212.935	205.386	203.304	206.243	200.959	204.443	224.904	207.209	203.882	635.994
same_same	Pik3cb	ENSMUSG00000032462	0.163483	4.15e-05	-0.166441	1.67e-05	169.05	168.978	165.87	186.656	192.079	185.816	146.381	150.572	152.097	173.835	188.184	149.683	511.702
same_same	Psmc1	ENSMUSG00000021178	0.17341	4.15e-05	0.213184	6.11e-07	118.412	111.324	112.865	121.487	132.814	132.284	135.409	130.024	131.877	115.226	128.862	132.436	376.524
same_same	Jak2	ENSMUSG00000024789	0.17852	4.16e-05	0.370363	1.38e-11	124.056	121.904	125.079	140.717	144.336	134.972	157.676	159.758	162.131	129.233	140.008	159.855	429.096
same_same	Ggnbp2	ENSMUSG00000020530	0.147939	4.17e-05	0.00393358	0.911401	93.7377	98.5172	94.4244	105.704	105.52	106.402	97.1676	93.8659	96.3763	99.5485	105.875	95.8033	301.227
same_same	Cbx2	ENSMUSG00000025577	-0.472786	4.26e-05	-0.701268	2.33e-08	13.345	11.9077	12.2134	9.47771	8.67289	8.87293	7.71274	7.39047	7.94698	11.1996	9.00785	7.6834	27.8909
same_same	Capza2	ENSMUSG00000015733	0.152371	4.29e-05	0.158538	1.15e-05	282.261	277.519	293.363	315.78	329.57	302.858	320.289	313.577	318.186	295.554	316.069	317.35	928.974
same_same	Arcn1	ENSMUSG00000032096	0.14239	4.29e-05	0.120485	0.000178987	197.353	200.204	197.683	220.376	223.667	213.098	216.215	210.974	219.815	206.088	219.047	215.668	640.803
up_same	Gm49774	ENSMUSG00000116657	0.552615	4.31e-05	0.997538	5.51e-11	6.00728	4.88303	5.79291	7.83282	8.0777	8.54158	11.1657	11.0166	11.138	6.16959	8.1507	11.1068	25.4271
same_same	Fen1	ENSMUSG00000024742	-0.179915	4.33e-05	-0.44727	2.88e-13	108.212	107.384	104.707	93.5239	92.936	96.3136	79.0637	75.0444	80.7585	101.871	94.2578	78.2888	274.418
same_same	Ube2j1	ENSMUSG00000028277	0.155633	4.34e-05	0.0709769	0.0313281	90.3511	88.8797	88.5349	99.1635	100.036	99.1854	91.8752	93.7968	95.6399	92.1927	99.4616	93.7706	285.425
same_same	Selenok	ENSMUSG00000042682	0.242632	4.34e-05	0.0666102	0.200507	52.2109	54.9126	52.6672	64.7774	66.4922	58.1343	53.0856	54.2543	59.8325	57.4524	63.1346	55.7241	176.311
same_same	Kif15	ENSMUSG00000036768	-0.184834	4.37e-05	-0.450652	4.67e-13	91.8428	92.4777	91.3348	78.7982	85.8361	78.1996	68.4466	66.7214	66.5521	87.5369	80.9446	67.24	235.722
same_same	Cbwd1	ENSMUSG00000024878	0.306068	4.38e-05	0.222159	0.000877396	17.4574	17.7331	16.4132	21.1095	22.1924	20.6912	20.3307	19.8921	20.0669	18.4186	21.331	20.0966	59.8462
same_same	Slc35b4	ENSMUSG00000018999	-0.202343	4.41e-05	-0.166659	0.000202598	84.9889	87.4662	85.5902	76.135	72.6567	75.3647	79.4509	75.8041	74.6525	83.0638	74.7188	76.6358	234.418
same_same	Ralgps1	ENSMUSG00000038831	-0.432448	4.42e-05	-0.182979	0.0349244	10.805	11.5222	11.5858	8.45945	7.31244	9.20429	9.39083	10.2223	10.2175	10.5225	8.32539	9.94357	28.7915
same_same	Enc1	ENSMUSG00000041773	-0.393667	4.43e-05	-0.0916608	0.252731	17.2961	18.8468	19.2131	14.569	13.9447	13.5487	17.5876	17.0948	17.152	17.543	14.0208	17.2781	48.8419
same_same	Emp3	ENSMUSG00000040212	0.149061	4.44e-05	0.210571	5.45e-08	144.699	144.735	147.526	157.792	163.127	163.505	166.421	169.359	169.74	150.018	161.475	168.507	479.999
same_same	N4bp2l1	ENSMUSG00000041132	-0.453085	4.53e-05	-0.211309	0.0209464	12.4177	14.5206	12.6478	9.7127	9.26809	9.90381	11.6175	11.2238	11.3528	12.2937	9.6282	11.3981	33.32
same_same	Gaa	ENSMUSG00000025579	-0.173823	4.56e-05	-0.253731	2.85e-08	81.2393	82.112	80.9076	74.7643	70.7861	70.9834	70.5442	67.1013	67.2271	79.2613	72.178	68.2909	219.73
same_same	Mafk	ENSMUSG00000018143	-0.269247	4.66e-05	-0.110552	0.0455426	44.8328	42.2339	42.1917	36.5793	33.2461	37.3326	37.7569	41.0275	41.085	40.335	35.7193	39.9565	116.011
same_same	Gars	ENSMUSG00000029777	0.143843	4.68e-05	0.124844	0.000148618	287.22	292.168	292.252	320.088	325.659	317.29	321.515	317.203	311.681	301.503	321.012	316.8	939.315
same_same	Exoc2	ENSMUSG00000021357	-0.159863	4.68e-05	0.03543	0.2981	100.148	103.486	103.983	91.3307	92.4684	91.4538	104.816	104.054	106.195	99.5998	91.7509	105.021	296.372
same_same	Entr1	ENSMUSG00000026927	0.182179	4.69e-05	0.179021	2.16e-05	56.3636	55.1696	55.3223	64.3075	63.3461	61.7792	63.1864	63.786	62.0417	58.2665	63.1443	63.0047	184.415
same_same	Ccnl1	ENSMUSG00000027829	0.199731	4.73e-05	0.109053	0.0110812	86.7628	90.336	89.066	101.553	108.369	96.0559	95.2637	99.5296	92.3568	93.6515	101.992	95.7167	291.361
same_same	Adnp2	ENSMUSG00000053950	-0.205619	4.73e-05	-0.154115	0.000594047	64.5883	66.7775	64.6875	58.7462	57.6067	53.8267	59.2494	59.8145	57.2244	63.4037	56.7265	58.7627	178.893
same_same	Nagpa	ENSMUSG00000023143	-0.203254	4.75e-05	-0.216168	6.62e-06	54.7912	57.6968	60.8738	50.4434	50.6344	49.2613	49.4067	49.7648	49.7683	56.338	50.113	49.6466	156.098
same_same	Rgl1	ENSMUSG00000026482	-0.181083	4.78e-05	-0.406568	3.78e-12	144.82	141.479	141.975	122.192	125.799	129.744	109.108	107.68	106.379	135.215	125.912	107.722	368.849
same_same	Itga8	ENSMUSG00000026768	-0.200782	4.78e-05	0.265244	1e-07	95.9955	103.186	103.017	90.8999	89.96	82.1022	120.984	117.591	124.145	99.0344	87.654	120.907	307.595
same_same	Fbxl4	ENSMUSG00000040410	-0.439611	4.81e-05	0.0447908	0.625794	11.3695	11.4794	10.2824	8.77276	8.12021	7.62115	11.2303	11.4311	11.5983	10.1782	8.17137	11.4199	29.7694
same_same	Cltc	ENSMUSG00000047126	0.136816	4.82e-05	-0.0294039	0.332797	1145.01	1162.03	1183.73	1289.91	1304.46	1243.65	1135.71	1135.16	1149.4	1211.89	1279.34	1140.09	3631.32
same_same	Slc23a2	ENSMUSG00000027340	0.188028	4.85e-05	0.380926	3.86e-11	275.448	271.436	269.032	317.738	312.437	299.471	351.204	349.424	361.879	286.069	309.882	354.169	950.12
same_same	Ankrd44	ENSMUSG00000052331	-0.332913	4.9e-05	-0.0663178	0.339199	25.1983	25.743	29.0128	23.146	19.3865	20.6544	25.7844	24.8997	25.4058	25.9673	21.0623	25.3633	72.3928
same_same	Wdhd1	ENSMUSG00000037572	-0.274892	5.05e-05	-0.571971	2.62e-11	60.6372	58.5963	61.8393	50.5217	50.3793	48.7459	43.0171	38.7136	39.9497	56.9858	49.8823	40.5601	147.428
same_same	Klhl21	ENSMUSG00000073700	-0.214263	5.08e-05	-0.446168	2.24e-11	36.971	35.8517	35.6264	32.3887	30.1851	30.9264	26.5267	26.4192	26.6945	34.6223	31.1667	26.5468	92.3358
same_same	Pskh1	ENSMUSG00000048310	-0.291228	5.08e-05	-0.268161	4.95e-05	23.8275	26.2141	25.2474	20.3653	20.1092	20.949	20.4275	20.5483	21.4476	23.9423	20.4745	20.8078	65.2246
same_same	Mndal	ENSMUSG00000090272	0.432859	5.16e-05	0.83135	2.4e-11	10.4422	10.9226	10.2341	13.5899	15.5177	13.696	17.5554	19.305	19.4225	11.5822	14.2679	18.761	44.6111
same_same	Msh6	ENSMUSG00000005370	-0.182862	5.19e-05	-0.439569	8.53e-13	119.339	117.364	122.182	107.349	103.862	104.782	91.6171	83.5054	89.2271	115.632	105.331	88.1165	309.079
same_same	Zfp362	ENSMUSG00000028799	-0.331931	5.2e-05	-0.433991	2.58e-07	19.2313	20.5601	19.9373	15.4698	15.8153	16.1259	14.5219	14.7119	14.9428	18.6557	15.8037	14.7255	49.1849
up_down	Klf4	ENSMUSG00000003032	0.583035	5.27e-05	-0.0729066	0.608453	5.28157	6.68204	5.59981	7.71533	9.77826	8.87293	5.8733	5.21477	5.58436	6.66573	8.78884	5.55748	21.012
same_same	Tk1	ENSMUSG00000025574	-0.223113	5.3e-05	-0.342635	1.33e-08	51.4046	52.5568	52.7637	46.2528	42.1741	45.6164	42.8557	41.4419	39.3053	50.5244	44.6811	41.201	136.407
same_same	2310022A10Rik	ENSMUSG00000049643	-0.192511	5.3e-05	-0.291686	1.63e-08	50.2757	49.9868	49.6742	43.198	43.2369	44.7328	39.7255	41.3728	41.4225	47.6197	43.7226	40.8403	132.182
same_same	Dip2a	ENSMUSG00000020231	-0.330745	5.32e-05	0.0223154	0.759763	20.4409	20.8171	19.9855	17.4672	15.4752	15.7577	20.8147	21.3426	20.1283	19.4233	16.2334	20.7618	56.4185
same_same	Ttyh3	ENSMUSG00000036565	-0.235601	5.34e-05	-0.615999	1.61e-13	56.7668	58.3822	57.5429	50.6	47.0207	48.93	38.9187	35.1911	38.4155	55.5084	48.8502	37.5084	141.867
same_same	Gas7	ENSMUSG00000033066	-0.18168	5.4e-05	-0.281545	1.53e-08	610.081	615.39	595.27	525.935	522.754	556.565	507.653	488.116	502.194	578.865	535.085	499.321	1613.27
same_same	Lpin2	ENSMUSG00000024052	-0.210724	5.41e-05	-0.156333	0.000711471	52.0093	50.5436	51.0259	42.6497	42.8118	47.0891	46.696	46.2422	44.951	48.0731	44.1835	45.9631	138.22
same_same	Rpl7l1	ENSMUSG00000063888	0.156979	5.42e-05	0.226027	4.5e-08	104.059	101.858	106.3	114.712	112.28	120.76	119.757	122.806	122.488	107.623	115.917	121.684	345.224
same_same	Lcor	ENSMUSG00000025019	0.193664	5.42e-05	0.0541354	0.198409	61.0807	61.5947	57.2532	73.0802	65.9395	66.9704	62.8637	62.0247	62.1644	63.976	68.6634	62.3509	194.99
same_same	Def6	ENSMUSG00000002257	0.187945	5.46e-05	0.352237	1.23e-10	52.735	51.1433	52.8603	61.0568	59.0097	58.4656	68.7693	63.0953	68.0249	55.0201	59.5107	66.6298	181.161
same_same	Tuba1c	ENSMUSG00000043091	0.234491	5.47e-05	0.207385	0.000112272	74.6676	72.8171	67.0046	81.3047	78.3962	92.6319	82.0326	82.7802	83.3052	73.7088	84.1109	82.706	240.526
same_same	Pls3	ENSMUSG00000016382	0.135737	5.52e-05	0.0692297	0.019337	245.936	233.571	239.295	261.734	270.56	257.646	248.163	252.105	253.935	244.867	263.313	251.401	759.581
same_same	Rrbp1	ENSMUSG00000027422	0.1695	5.54e-05	0.346144	3.22e-11	180.501	172.576	168.96	198.758	197.223	191.523	223.444	221.369	219.14	180.098	195.835	221.318	597.25
same_same	Rusc2	ENSMUSG00000035969	-0.206824	5.58e-05	-0.339156	4.15e-09	98.8983	99.074	98.9139	88.1192	84.1781	84.9003	75.9334	82.2967	76.6162	95.3691	85.7326	78.2821	259.384
same_same	Wdtc1	ENSMUSG00000037622	-0.195335	5.58e-05	-0.174779	8.38e-05	46.7277	49.8583	48.5639	41.7489	42.2591	42.6711	43.5334	44.0665	41.0236	46.7237	42.2264	42.8745	131.825
same_same	Megf8	ENSMUSG00000045039	-0.1547	5.6e-05	-0.0972412	0.00390876	122.202	128.415	124.885	114.516	109.687	112.955	115.336	118.904	116.781	122.605	112.386	117.007	351.998
same_same	Cenpb	ENSMUSG00000068267	-0.130129	5.61e-05	-0.112453	0.000172547	236.058	232.843	240.551	215.873	212.486	219.688	219.668	218.917	217.575	229.755	216.015	218.72	664.491
same_same	Trpv2	ENSMUSG00000018507	0.177769	5.61e-05	0.399674	2.74e-12	110.389	111.667	104.803	125.834	121.676	122.454	145.251	142.456	143.782	114.102	123.321	143.83	381.253
same_same	Mcts2	ENSMUSG00000042814	0.451588	5.65e-05	0.210729	0.0328581	8.95044	10.7941	9.89622	14.3732	13.3495	12.7755	12.0693	11.5347	10.6778	11.6878	13.4994	11.4273	36.6145
same_same	Dctd	ENSMUSG00000031562	-0.281027	5.76e-05	-0.136311	0.0203685	21.6504	21.8451	22.4958	17.9372	18.7488	17.6354	20.1048	20.2375	19.668	20.7594	18.1071	20.0034	58.8699
same_same	Dnaja2	ENSMUSG00000031701	0.140971	5.77e-05	0.0876581	0.00480997	148.569	145.291	151.34	160.064	166.953	163.836	155.513	158.964	158.51	152.232	163.618	157.663	473.512
same_same	S1pr1	ENSMUSG00000045092	-0.32459	5.8e-05	-0.588096	6.74e-10	25.3999	24.2866	25.2474	21.6186	19.1739	19.0345	16.3613	17.9582	15.6178	23.7175	19.9423	16.6458	60.3056
same_same	Glce	ENSMUSG00000032252	-0.208613	5.97e-05	-0.636714	4.85e-15	93.5361	88.0658	89.066	78.759	75.0801	80.335	58.8621	57.0862	58.2062	85.2969	78.058	58.0515	221.406
same_same	Mcm3	ENSMUSG00000041859	-0.167104	5.99e-05	-0.488758	1.06e-14	202.353	198.148	192.904	176.943	175.201	176.538	143.993	138.45	140.56	189.332	176.228	141.001	506.56
same_same	Ccnb2	ENSMUSG00000032218	-0.194985	6.08e-05	-0.251728	3.95e-07	75.353	73.1169	77.4319	64.8166	65.7694	66.6022	63.3478	62.8535	63.3917	71.7885	65.7294	63.1977	200.716
same_same	Nrp2	ENSMUSG00000025969	-0.126942	6.09e-05	-0.21647	2.65e-09	1564.15	1561.71	1512.96	1427.45	1398.29	1422.39	1337.82	1303.28	1351.42	1500.71	1416.05	1330.84	4247.59
same_same	Atp6v1e1	ENSMUSG00000019210	0.138321	6.09e-05	0.128145	7.51e-05	137.845	133.212	137.678	148.589	150.288	150.95	150.221	149.294	147.188	139.826	149.942	148.901	438.67
same_same	Cep83	ENSMUSG00000020024	0.231369	6.09e-05	0.29708	3.72e-07	60.0325	55.855	61.1635	67.9889	75.6753	64.5036	73.3517	71.729	72.2899	61.6691	69.3893	72.4569	203.515
same_same	Tyk2	ENSMUSG00000032175	-0.20626	6.09e-05	-0.135756	0.00247026	57.2909	59.6672	54.9844	48.7201	48.6787	51.6544	53.7956	52.942	50.0138	54.4572	49.6844	52.2505	156.392
same_same	Lrrk1	ENSMUSG00000015133	-0.268952	6.09e-05	-0.0783234	0.166651	50.0338	49.9011	48.226	44.7254	40.346	38.0689	44.8888	48.2798	47.3137	47.6175	41.0468	46.8274	135.492
same_same	Angpt2	ENSMUSG00000031465	-0.445231	6.09e-05	-0.442585	2.06e-05	17.1349	16.3624	16.027	11.2401	12.9668	12.2601	11.3271	11.9836	13.1325	14.5432	12.1557	12.1477	38.8466
same_same	Ogfrl1	ENSMUSG00000026158	-0.263479	6.1e-05	-0.0398703	0.488794	31.6491	34.9094	36.5436	30.3522	28.612	26.7661	33.4326	33.9133	32.7084	33.935	28.5768	33.3514	95.8633
same_same	Ccr2	ENSMUSG00000049103	0.217334	6.13e-05	0.255569	1.96e-06	84.8276	94.5337	93.9899	105.195	112.663	99.9217	106.526	113.413	106.134	97.9061	105.926	108.691	312.523
same_same	Slc45a4	ENSMUSG00000079020	-0.234568	6.19e-05	-0.250745	7.9e-06	36.85	40.2636	37.6056	33.0153	32.1832	32.2886	31.3673	32.2556	32.7698	36.9615	32.4957	32.1309	101.588
same_same	Abce1	ENSMUSG00000058355	0.13799	6.26e-05	0.102873	0.0010454	282.624	275.805	287.811	307.752	318.261	305.177	302.281	299.694	306.68	290.456	310.397	302.885	903.738
same_same	Rlim	ENSMUSG00000056537	0.171456	6.27e-05	0.0767295	0.0415067	208.763	224.919	219.648	247.752	248.921	239.054	233.383	227.723	227.762	230.773	245.242	229.623	705.638
same_same	Fbxw4	ENSMUSG00000040913	-0.267446	6.27e-05	-0.253122	4.39e-05	33.1408	33.196	35.4333	28.8248	26.5289	28.9383	27.0753	29.7691	28.4741	32.4847	28.0973	28.4395	89.0215
same_same	Cct2	ENSMUSG00000034024	0.13296	6.28e-05	0.133519	2.94e-05	345.721	342.412	355.733	376.563	388.367	379.658	377.698	386.031	381.271	358.236	381.529	381.667	1121.43
same_same	Itsn2	ENSMUSG00000020640	0.154613	6.36e-05	0.339957	7.6e-12	183.242	189.196	181.704	206.082	214.186	196.898	236.158	234.147	231.199	192.327	205.722	233.835	631.884
same_up	Dock8	ENSMUSG00000052085	-0.126697	6.36e-05	0.413591	3.64e-16	195.337	195.364	195.945	184.541	176.094	176.649	258.167	259.219	263.969	191.95	179.095	260.452	631.496
same_same	Vac14	ENSMUSG00000010936	-0.172253	6.45e-05	-0.393373	4.03e-12	96.3987	98.6457	97.0312	86.9443	85.5385	86.6676	75.5461	72.178	74.5604	94.2071	86.3835	74.0948	254.685
same_same	Gm42547	ENSMUSG00000106990	-0.322057	6.47e-05	-0.0209934	0.772338	25.2386	25.6573	24.7647	20.8353	21.5547	18.3349	24.655	26.1084	23.933	23.7524	20.2416	24.8988	68.8929
same_up	Rarg	ENSMUSG00000001288	0.413247	6.57e-05	0.940789	5.39e-13	8.95044	10.4086	9.70312	13.4725	12.6267	12.5546	18.588	19.2359	17.9497	11.1947	12.8846	18.5912	42.6706
same_same	Layn	ENSMUSG00000060594	0.260623	6.58e-05	0.0222282	0.721668	32.3748	28.6557	28.1922	35.6002	35.967	35.639	31.1414	28.733	30.8981	30.816	35.7354	30.2575	96.8089
same_same	Slc37a3	ENSMUSG00000029924	0.205106	6.59e-05	0.225534	5.62e-06	47.6147	45.7463	48.0329	56.788	53.5254	52.6485	55.6027	54.4961	55.1379	50.189	54.3206	55.0789	159.589
same_same	Sppl3	ENSMUSG00000029550	-0.248596	6.59e-05	-0.309312	7.99e-07	49.7515	56.0263	52.1362	43.1197	44.98	44.7696	40.1127	43.4794	43.7851	50.4274	44.2898	42.4591	137.176
same_same	Ywhah	ENSMUSG00000018965	0.155584	6.6e-05	0.248478	8.47e-09	152.843	142.593	150.229	167.466	164.615	164.352	171.52	175.817	182.044	153.429	165.477	176.46	495.367
same_same	Carhsp1	ENSMUSG00000008393	0.197479	6.7e-05	0.409097	1.68e-11	54.0655	56.9686	55.2257	62.4276	63.6863	64.4668	72.8999	73.4212	74.3763	58.2073	63.5269	73.5658	195.3
same_same	Slc16a10	ENSMUSG00000019838	-0.208747	6.8e-05	-0.334594	9.63e-09	173.203	188.339	189.042	158.771	163.212	154.301	143.38	142.664	150.164	178.717	158.761	145.402	482.881
same_same	Pianp	ENSMUSG00000030329	-0.145471	6.95e-05	-0.419771	1.76e-14	235.171	237.726	228.53	216.538	203.175	214.386	171.294	177.544	175.662	227.598	211.367	174.833	613.798
same_same	Smpdl3b	ENSMUSG00000028885	-0.184443	6.95e-05	0.0596657	0.12818	72.5711	74.6589	77.5284	64.7383	63.6863	68.9217	77.9019	76.4603	79.5311	72.3085	65.7821	77.9644	216.055
same_same	Srsf5	ENSMUSG00000021134	0.196319	6.96e-05	-0.155214	0.000662542	171.873	165.68	170.36	184.032	204.323	193.805	147.801	159.31	149.152	173.357	194.054	152.087	519.498
same_same	Banp	ENSMUSG00000025316	-0.358469	6.97e-05	-0.0265444	0.742652	19.4733	19.0181	19.1649	16.7231	13.8596	14.3587	19.2334	19.1669	18.2566	18.302	14.9805	18.8856	52.1681
same_same	Stk3	ENSMUSG00000022329	0.166064	7.03e-05	0.106249	0.00412332	90.472	92.6062	94.3761	103.628	108.199	99.5536	99.5234	97.9755	100.917	96.8702	103.793	99.4721	300.136
same_same	Mybbp1a	ENSMUSG00000040463	0.143684	7.04e-05	0.20081	1.58e-07	411.156	408.975	397.731	458.612	444.571	442.321	462.474	461.594	475.745	421.773	448.501	466.604	1336.88
same_same	Cln6	ENSMUSG00000032245	-0.297358	7.06e-05	-0.490906	5.28e-09	38.6643	41.4629	40.2124	31.4488	33.5437	32.9145	26.8816	28.1805	30.4378	37.708	32.6357	28.5	98.8437
same_same	Slc35e4	ENSMUSG00000048807	0.17771	7.07e-05	0.044669	0.260576	75.7159	73.6309	79.1697	87.1793	86.984	84.164	77.2242	77.1164	81.0346	79.9933	86.1091	78.4584	244.561
same_same	Echs1	ENSMUSG00000025465	-0.23288	7.07e-05	-0.164077	0.00141841	40.9624	41.7627	45.0881	35.4435	34.9041	38.0321	37.8538	37.3322	38.5996	40.7648	36.1266	37.9285	114.82
same_same	Agpat4	ENSMUSG00000023827	0.20375	7.1e-05	-0.07738	0.087866	99.4225	101.216	100.459	115.299	114.873	116.526	96.3286	89.549	99.2605	105.658	115.566	95.046	316.27
same_same	Man1c1	ENSMUSG00000037306	-0.178956	7.1e-05	-0.204498	3.71e-06	84.626	85.7528	87.9074	74.4118	74.6974	78.7519	74.7394	75.4933	73.824	82.6907	75.9537	74.6856	233.33
same_same	Mboat1	ENSMUSG00000038732	-0.216618	7.25e-05	-0.223236	1.63e-05	49.6709	49.5156	52.5224	44.0988	42.9818	43.297	41.2099	43.9629	44.6135	48.7123	43.4592	43.2621	135.434
same_same	Lims1	ENSMUSG00000019920	0.20723	7.26e-05	0.186495	0.000139938	244.323	259.571	265.557	300.663	321.067	266.74	288.566	290.646	296.063	275.264	296.157	291.758	863.179
same_same	Mir100hg	ENSMUSG00000074415	0.40892	7.26e-05	0.380742	6.71e-05	10.3212	11.3937	11.0065	15.1957	14.7524	13.5119	13.941	15.0227	13.6541	12.532	14.4867	14.2059	41.2246
same_same	Son	ENSMUSG00000022961	0.136256	7.28e-05	0.0351482	0.253874	572.828	592.688	578.76	633.244	643.962	639.845	597.915	598.455	590.93	601.564	639.017	595.767	1836.35
same_same	Ifi203	ENSMUSG00000039997	0.364869	7.28e-05	0.680736	1.19e-10	19.6748	20.8599	19.2131	24.83	29.0797	23.4157	31.9805	33.7061	30.3151	21.6344	25.7751	32.0005	79.4101
same_same	Arl2bp	ENSMUSG00000031776	0.320905	7.28e-05	0.182531	0.0168575	11.0469	10.1087	10.8134	13.4725	12.8818	13.5487	12.3598	12.4671	11.5062	11.4649	13.301	12.111	36.8769
same_same	Tab3	ENSMUSG00000035476	0.244374	7.3e-05	-0.00389811	0.956727	22.9809	23.8583	24.8612	28.5898	28.0168	28.1651	23.8159	24.3816	23.2273	25.7698	28.2573	23.8083	77.8353
same_same	Dynll1	ENSMUSG00000009013	0.24492	7.32e-05	0.620113	1.25e-13	57.7344	55.0411	55.9498	65.4432	62.7084	71.5357	84.2916	86.9934	88.1531	58.8114	66.5625	86.4794	211.853
same_same	Clip1	ENSMUSG00000049550	-0.1614	7.34e-05	-0.0775583	0.0278614	135.708	131.927	129.037	119.686	116.361	118.772	122.533	124.844	128.686	126.883	118.273	125.354	370.51
same_same	Gid4	ENSMUSG00000018415	-0.23132	7.34e-05	-0.0642609	0.193943	36.6081	39.107	38.5711	34.2686	30.6102	32.2886	36.692	35.8818	36.6052	37.3156	32.3891	36.393	106.098
same_same	Tfb1m	ENSMUSG00000036983	-0.421283	7.37e-05	-0.123797	0.157545	11.2485	11.6507	11.1513	7.36285	9.26809	8.83611	10.1653	10.844	10.2789	10.055	8.48902	10.4294	28.9734
same_same	Ebna1bp2	ENSMUSG00000028729	0.22213	7.38e-05	0.262074	2.09e-06	60.0325	54.9983	50.881	64.9733	65.3443	63.8777	67.2203	68.1374	64.3429	56.9509	64.7318	66.5668	188.249
same_same	Slc35b1	ENSMUSG00000020873	0.199908	7.38e-05	0.256239	4.94e-07	52.6544	55.2553	56.2878	61.0177	61.348	65.829	65.5099	64.4421	65.8771	57.5202	62.7316	65.2764	185.528
same_same	Spred1	ENSMUSG00000027351	0.171349	7.39e-05	0.106439	0.00601196	581.416	595.686	611.731	683.649	690.218	640.545	630.218	637.722	657.697	630.355	671.47	641.879	1943.7
same_same	Cdca2	ENSMUSG00000048922	-0.230299	7.45e-05	-0.405594	1.52e-09	69.6683	72.2602	67.9218	58.3937	60.6252	60.0119	53.376	52.8729	52.2844	66.1919	59.677	52.8445	178.713
same_same	Tgm2	ENSMUSG00000037820	-0.191154	7.48e-05	-0.600046	3.4e-15	94.9069	93.1202	88.5832	77.3099	81.4147	83.7222	61.2824	60.0907	61.2439	86.3378	80.8156	60.8723	228.026
same_same	Zwint	ENSMUSG00000019923	0.167264	7.5e-05	0.132017	0.000561797	69.507	64.0362	66.2805	74.0593	76.6531	73.9288	71.48	74.5954	73.0876	68.1253	74.8804	73.0544	216.06
same_same	Hs1bp3	ENSMUSG00000020605	-0.453294	7.51e-05	-0.309654	0.00169553	11.0066	12.7644	11.441	9.28189	8.41781	8.02614	9.51991	9.46256	9.41978	11.1624	8.57528	9.46742	29.2051
same_same	Atf6	ENSMUSG00000026663	0.137751	7.57e-05	-0.00632204	0.852834	229.849	225.99	228.578	248.535	255.34	249.215	227.929	226.066	227.425	234.368	251.03	227.14	712.538
same_same	Nde1	ENSMUSG00000022678	-0.164903	7.63e-05	-0.119456	0.00129629	96.5196	95.4332	92.8313	82.5579	84.3056	87.2198	87.5832	86.8898	87.8156	90.2742	84.6945	87.4295	262.398
same_same	Nup214	ENSMUSG00000001855	-0.157485	7.65e-05	-0.233058	5.03e-08	127.604	133.298	130.34	121.918	112.833	115.864	109.237	112.135	111.472	128.519	116.871	110.948	356.338
same_same	Pigx	ENSMUSG00000023791	0.391853	7.65e-05	0.655379	1.61e-09	15.2803	15.2916	14.2892	20.3262	20.5344	18.2245	23.7836	23.8982	23.1352	16.6356	19.695	23.6057	59.9363
same_same	Celf3	ENSMUSG00000028137	-0.456227	7.65e-05	-0.277306	0.00455031	10.0793	10.5799	8.39972	7.59784	6.12204	7.47388	8.61633	7.77035	7.70151	8.85915	7.06459	8.0294	23.9531
same_same	Abhd17a	ENSMUSG00000003346	-0.274268	7.67e-05	-0.180943	0.00270555	37.4144	40.1351	46.3915	34.4253	32.6934	34.7922	35.5948	35.8472	37.3416	40.3173	33.9703	36.2612	110.549
same_same	Bsn	ENSMUSG00000032589	-0.21579	7.74e-05	-0.658881	8.8e-15	54.4687	54.2273	54.6947	46.9969	46.7656	46.905	33.8844	36.1235	33.5675	51.973	46.8892	34.5252	133.387
same_same	Blvra	ENSMUSG00000001999	0.168496	7.75e-05	-0.271515	1.53e-08	133.329	129.486	129.471	144.398	147.524	149.073	109.915	108.681	106.532	134.452	146.998	108.376	389.826
same_same	Klc4	ENSMUSG00000003546	-0.281032	7.97e-05	-0.475792	3.87e-09	33.423	34.3097	35.7712	29.2164	27.0815	28.6806	25.8813	24.5889	23.8716	33.0991	28.3262	24.7806	86.2059
same_same	Tpp1	ENSMUSG00000030894	-0.125441	8.03e-05	-0.233053	6.02e-10	214.165	223.206	219.02	203.693	203.685	194.431	186.493	184.002	187.874	215.306	200.603	186.123	602.032
same_same	Eif2ak3	ENSMUSG00000031668	-0.184342	8.09e-05	-0.199403	9.37e-06	62.2096	60.4382	61.5014	54.2031	54.4607	53.4585	55.99	51.2153	53.1128	58.7142	54.0408	53.4394	166.194
same_same	Snhg1	ENSMUSG00000108414	0.232146	8.11e-05	0.105581	0.0399858	30.8024	29.084	28.5783	33.0937	34.6491	36.2649	32.4	32.1175	30.8674	30.252	34.6692	31.7949	96.7162
same_same	2010016I18Rik	ENSMUSG00000091575	-0.286277	8.13e-05	-0.081708	0.186335	60.8791	66.0922	57.736	49.9734	48.5937	52.9062	61.0565	60.7814	53.1742	57.9339	50.4911	58.3374	166.762
same_same	Nop56	ENSMUSG00000027405	0.133347	8.18e-05	0.129201	5.66e-05	151.754	153.644	152.836	169.071	165.465	167.997	163.904	172.709	164.647	158.517	167.511	167.087	493.115
same_same	Cdk18	ENSMUSG00000026437	0.21593	8.21e-05	0.0947603	0.0499272	162.963	163.282	152.884	189.28	181.153	186.295	164.807	178.476	168.82	168.482	185.576	170.701	524.759
same_same	Pcf11	ENSMUSG00000041328	0.200463	8.21e-05	0.0248417	0.60201	86.9241	89.9505	90.5625	104.529	106.328	96.5714	88.8095	92.7608	90.4237	95.014	102.476	90.6647	288.155
same_same	Ddx47	ENSMUSG00000030204	0.13581	8.21e-05	0.211245	1.61e-08	82.6101	81.5123	82.0179	89.7641	89.875	90.7911	93.2306	95.3854	96.3456	84.4314	90.1434	94.9872	269.562
same_same	Pde12	ENSMUSG00000043702	0.188365	8.21e-05	-0.120582	0.00529246	47.3325	50.2866	49.6259	58.3154	56.4588	53.0167	45.3729	45.966	44.0612	52.7426	55.9303	45.1334	153.806
same_same	Ssb	ENSMUSG00000068882	0.181578	8.26e-05	0.0551155	0.177981	170.744	166.965	170.215	188.301	206.024	182.134	180.491	174.125	173.085	175.16	192.153	175.9	543.214
same_same	Ktn1	ENSMUSG00000021843	0.190901	8.29e-05	0.0636674	0.136201	100.108	99.5881	101.183	116.474	119.082	108.132	104.977	106.782	102.728	105.748	114.563	104.829	325.14
same_same	Gpt	ENSMUSG00000022546	-0.22089	8.31e-05	-0.220755	2.85e-05	30.6008	30.3262	30.799	25.6917	26.5714	26.4347	26.5912	25.4868	26.5717	28.9389	26.2326	26.2166	81.3881
same_same	Pld3	ENSMUSG00000003363	0.187399	8.79e-05	0.182575	5.07e-05	85.9565	82.9258	80.087	95.2863	92.8935	95.5405	92.7788	94.9019	95.1796	86.0997	94.5734	94.2868	274.96
same_same	Tap1	ENSMUSG00000037321	-0.331026	8.84e-05	-0.0835608	0.242193	28.6656	29.6837	28.9163	24.4384	21.7673	23.0843	28.5597	27.0063	26.7865	27.6794	23.0967	27.4509	78.227
same_same	Slfn2	ENSMUSG00000072620	-0.157125	8.85e-05	-0.280462	1.53e-09	82.7714	84.3821	83.611	73.5502	78.2261	73.2293	67.4139	69.7605	69.2829	80.5144	75.0019	68.8191	224.335
same_same	Rtf2	ENSMUSG00000027502	0.167025	8.91e-05	0.0381089	0.319338	58.9036	59.6672	60.729	66.4223	66.9598	67.7804	61.4438	60.1943	62.2871	62.2728	67.0542	61.3084	190.635
same_same	Zfp516	ENSMUSG00000058881	0.299779	8.91e-05	0.708399	5.84e-13	20.5618	20.3888	19.0683	26.3574	23.4253	24.1889	32.1741	33.7061	32.4323	21.9382	24.6572	32.7708	79.3662
same_same	Hnrnpa3	ENSMUSG00000059005	0.155992	8.93e-05	0.0305223	0.40202	388.417	372.866	352.45	409.265	430.201	401.933	381.474	376.845	379.522	378.194	413.8	379.28	1171.27
same_same	Hectd3	ENSMUSG00000046861	-0.243022	8.93e-05	-0.0666148	0.206643	32.0522	32.5535	34.1299	28.0415	28.1869	27.1342	30.7864	32.4628	30.9595	31.575	27.7875	31.4029	90.7654
down_down	Cd93	ENSMUSG00000027435	-0.533777	8.94e-05	-1.23052	2.33e-11	9.91805	9.85172	9.60657	6.57957	6.54718	7.14253	4.80836	4.24779	3.4979	8.67929	6.75643	4.18468	19.6204
same_same	Nol10	ENSMUSG00000061458	0.164977	8.96e-05	0.122291	0.00120339	47.9776	46.3459	46.826	52.3624	53.7804	52.2435	50.633	50.6972	52.315	48.5114	52.7955	51.2151	152.522
same_same	Mgat4b	ENSMUSG00000036620	-0.160318	8.97e-05	-0.216381	3.72e-07	186.992	187.654	190.635	168.092	161.341	176.023	157.159	163.661	165.629	182.127	168.485	162.15	512.762
down_down	Fads3	ENSMUSG00000024664	-0.659276	9.15e-05	-1.35111	3.52e-10	5.03966	5.05436	4.8757	3.0548	2.97599	3.42399	2.12988	1.55407	2.14783	4.32829	3.1516	1.94393	9.42381
same_same	Siglec1	ENSMUSG00000027322	-0.25178	9.17e-05	0.23886	3.07e-05	32.4554	34.0099	35.7712	29.4514	27.9743	28.2387	38.951	38.2647	43.018	33.0775	28.5548	40.0779	101.71
same_same	Cfdp1	ENSMUSG00000031954	0.195906	9.22e-05	0.11495	0.00917209	57.5731	57.5255	54.1637	62.8584	65.5144	65.7554	62.6055	59.331	61.52	58.1825	64.7094	61.1522	184.044
same_same	Txndc9	ENSMUSG00000058407	0.201119	9.27e-05	0.0839561	0.0621437	50.0741	46.9884	46.2467	53.929	56.884	54.3053	48.2127	51.3879	52.4991	49.0547	55.0394	50.6999	154.794
same_same	Itga4	ENSMUSG00000027009	-0.23883	9.33e-05	-0.375304	2.74e-08	1904.75	2006.28	2051.46	1675.79	1729.69	1647.27	1584.5	1429.37	1582.65	1911.18	1684.25	1532.17	5127.6
same_same	Fbxl17	ENSMUSG00000023965	-0.238173	9.39e-05	-0.0518696	0.324728	30.5605	34.1384	33.5989	27.1407	27.6342	28.386	30.5928	31.9793	32.0947	31.626	27.7203	31.5556	90.9019
same_same	Sbds	ENSMUSG00000025337	0.205322	9.58e-05	0.229362	6.82e-06	53.7833	50.3723	46.826	56.0438	61.0504	57.6188	58.1844	59.2964	59.9859	51.0807	58.2377	59.1556	168.474
same_same	Zc3h15	ENSMUSG00000027091	0.180004	9.59e-05	0.117594	0.00413737	73.9822	76.2438	76.1285	84.712	89.875	82.0286	83.1298	78.4288	83.7654	79.0281	85.5385	81.7747	246.341
same_same	Mcm6	ENSMUSG00000026355	-0.133512	9.62e-05	-0.590614	8.73e-19	228.639	221.15	230.751	202.753	211.593	206.066	154.19	148.396	149.244	218.218	206.804	150.61	575.632
up_same	Nedd9	ENSMUSG00000021365	0.517408	9.65e-05	0.499453	5.56e-05	17.0542	15.2059	16.1719	23.8901	23.893	21.7221	22.2346	23.1039	23.1966	18.4226	23.1684	22.845	64.4361
same_same	Clint1	ENSMUSG00000006169	0.167668	9.68e-05	0.0891767	0.0187048	112.969	109.911	108.231	125.403	128.478	118.478	118.37	116.175	117.824	114.515	124.12	117.456	356.091
same_same	Slfn10-ps	ENSMUSG00000072621	-0.260251	9.72e-05	-0.396297	3.83e-08	40.1157	43.7759	42.1917	32.937	38.5179	33.9822	31.335	33.637	30.8674	39.6349	35.1457	31.9465	106.727
same_same	Cited2	ENSMUSG00000039910	0.146438	9.9e-05	0.274004	7.9e-10	441.555	435.96	435.482	487.946	473.821	491.472	514.043	531.734	541.867	453.129	484.413	529.215	1466.76
same_same	Thg1l	ENSMUSG00000011254	0.264786	9.98e-05	0.0454804	0.46949	23.8275	22.0165	22.7854	28.0807	27.8468	26.6556	22.9446	23.3456	24.5466	24.2942	27.5277	23.6123	75.4342
same_same	Mcu	ENSMUSG00000009647	0.208473	0.000100025	0.239298	4.67e-06	52.0899	52.5568	49.0949	59.3728	61.4755	57.2138	60.6047	62.5427	58.6972	53.6748	59.354	60.6149	173.644
same_same	Chst10	ENSMUSG00000026080	-0.20865	0.000100462	-0.580632	1.05e-13	86.5209	98.1745	91.3831	77.9366	80.0542	80.7768	61.5406	61.0232	61.9189	89.1647	79.5892	61.4942	230.248
same_same	Far1	ENSMUSG00000030759	0.214347	0.000101142	-0.0166621	0.755002	171.389	188.168	190.49	218.144	227.961	192.112	186.526	178.787	178.025	198.934	212.739	181.113	592.786
same_same	Slc25a39	ENSMUSG00000018677	-0.153518	0.00010227	-0.262408	4.73e-09	169.857	173.176	177.746	150.899	153.349	163.542	142.702	142.802	148.384	167.274	155.93	144.629	467.833
same_same	Aars	ENSMUSG00000031960	0.133711	0.000103076	-0.103437	0.00108701	242.589	238.155	236.254	264.279	262.78	259.708	222.83	224.132	220.552	246.229	262.256	222.505	730.99
same_same	D1Ertd622e	ENSMUSG00000044768	0.15945	0.000103613	0.16568	2.48e-05	101.68	104.257	107.507	119.96	119.295	110.783	113.303	120.665	117.425	110.574	116.679	117.131	344.385
same_same	Ikbke	ENSMUSG00000042349	-0.213172	0.000104722	0.0719153	0.123294	61.7661	62.6655	59.3773	54.8298	50.8895	52.8694	66.7039	65.9617	60.8143	58.9575	52.8629	64.4933	176.314
same_same	Tln1	ENSMUSG00000028465	0.14604	0.000104938	0.255404	3.66e-09	1475.85	1439.68	1460.34	1674.66	1612.86	1554.57	1684.19	1787.01	1752.2	1524.89	1614.03	1741.13	4880.05
same_same	Arhgef11	ENSMUSG00000041977	-0.160078	0.000104938	-0.0231784	0.538364	125.145	132.741	127.685	117.257	116.319	111.593	125.114	127.123	127.152	125.895	115.056	126.463	367.414
same_same	Atp11c	ENSMUSG00000062949	0.223491	0.000104938	0.205655	0.000127101	79.5057	80.2273	85.9764	95.0513	103.437	88.5084	93.1983	97.8374	92.0806	87.085	95.6656	94.3721	277.123
same_same	Clip2	ENSMUSG00000063146	0.328099	0.000105533	0.781166	5.12e-13	14.9174	14.6062	13.4685	18.603	18.8338	16.7886	23.235	25.5558	25.3137	15.5592	18.0751	24.7015	58.3359
same_same	Jmjd6	ENSMUSG00000056962	0.260978	0.000105882	0.293161	6.62e-06	36.9306	32.3393	32.4886	40.0649	40.0909	42.0084	39.5964	44.2047	41.3304	34.9643	40.7214	41.7105	117.396
same_same	Foxm1	ENSMUSG00000001517	-0.176171	0.000106305	-0.367065	8.08e-11	184.573	194.721	185.373	164.45	169.802	165.64	146.607	147.395	143.905	181.515	166.631	145.969	494.114
same_same	Lmtk2	ENSMUSG00000038970	-0.164427	0.000106305	-0.205161	1.52e-06	94.1812	94.191	94.6175	87.4143	82.9452	82.139	79.7091	82.2967	83.4279	92.0743	84.1662	81.8112	258.052
same_same	Fabp4	ENSMUSG00000062515	-0.235451	0.00010667	-0.449219	5.84e-10	175.783	163.753	158.871	138.171	142.593	142.924	127.793	116.279	121.168	153.598	141.229	121.747	416.574
same_same	Ccnl2	ENSMUSG00000029068	0.216333	0.00010667	0.232586	1.5e-05	75.7159	75.6869	78.3491	89.9991	92.2983	84.7162	91.1653	94.971	83.9189	81.345	89.0046	90.0184	260.368
same_same	Blm	ENSMUSG00000030528	-0.172582	0.000108283	-0.361022	6.83e-11	59.3067	59.6243	56.2878	51.8533	52.59	51.2495	45.4374	46.7603	44.4601	55.9218	51.8976	45.5526	153.372
same_same	Rufy1	ENSMUSG00000020375	-0.232157	0.000109312	-0.382343	1e-08	43.4217	45.6178	45.0399	40.0257	38.2203	35.9335	34.5944	33.1535	34.979	43.5611	38.0598	34.2423	115.863
same_same	Zdhhc20	ENSMUSG00000021969	0.214487	0.000110396	0.10648	0.02932	91.9638	94.3195	95.6313	110.756	116.361	100.29	99.588	99.2879	104.354	100.236	109.136	101.077	310.448
same_same	Ptpro	ENSMUSG00000030223	0.202977	0.000110569	0.222298	1.1e-05	51.5255	54.3986	56.336	59.5686	62.1132	64.6877	63.2187	62.8881	62.8701	56.7678	62.1232	62.9923	181.883
same_same	Nup62	ENSMUSG00000109511	-0.146498	0.000111135	-0.370769	9.5e-13	124.5	126.873	125.706	112.558	112.62	115.385	95.9414	96.9395	98.6775	121.712	113.521	97.1861	332.419
same_same	Atf3	ENSMUSG00000026628	-0.385724	0.000111544	-0.614612	2.43e-08	60.7582	58.0823	55.805	44.6471	44.4698	44.7328	38.4992	39.4043	36.4211	52.8448	44.6166	38.1082	135.57
same_same	Uba3	ENSMUSG00000030061	0.204152	0.000111544	0.101125	0.0288165	38.9465	36.794	36.6401	42.3756	44.5549	42.7815	40.4677	39.7842	40.4099	38.6032	43.2373	40.2206	122.061
same_down	Tns3	ENSMUSG00000020422	-0.138143	0.000113872	-0.778289	2.66e-21	795.863	788.009	764.181	718.348	700.294	715.063	452.696	451.958	464.423	756.846	711.235	456.359	1924.44
same_same	Slc19a2	ENSMUSG00000040918	-0.184115	0.000113872	0.0575358	0.157477	69.7489	71.9176	72.9906	62.7801	62.5809	63.3991	75.3203	72.4542	75.3582	69.2294	62.92	74.3776	206.527
same_same	Mtmr10	ENSMUSG00000030522	-0.253396	0.000113872	-0.469974	1.07e-09	34.6326	37.7364	38.2332	27.7282	33.1611	31.81	26.0103	27.1099	26.6024	34.5659	30.8998	26.5742	92.0399
same_same	Pld4	ENSMUSG00000052160	-0.155673	0.0001146	-0.0521002	0.139565	149.98	149.917	145.547	133.158	131.581	135.193	144.638	142.353	142.8	142.874	133.311	143.264	419.448
same_same	Tmed8	ENSMUSG00000034111	-0.201101	0.0001146	0.0335753	0.467693	67.7734	69.0049	67.3426	60.7435	60.5402	56.4775	72.2868	70.5548	66.2453	65.697	59.2537	69.6956	194.646
same_same	Hnrnpk	ENSMUSG00000021546	0.135049	0.000115132	0.0171664	0.604044	560.007	558.85	550.664	606.495	625.681	601.298	557.867	560.709	570.955	572.003	611.158	563.177	1746.34
same_same	Hcls1	ENSMUSG00000022831	0.161339	0.000116621	0.613803	4.41e-17	311.814	293.624	287.956	333.365	321.662	344.167	449.888	447.4	470.099	304.982	333.065	455.796	1093.84
same_same	Gnl3l	ENSMUSG00000025266	0.128162	0.000116956	0.176654	2.99e-07	97.5275	99.331	100.121	109.66	109.389	105.518	112.109	110.408	112.976	103.037	108.189	111.831	323.057
same_same	Bmt2	ENSMUSG00000042742	0.194285	0.000117403	0.145616	0.00145196	113.654	122.033	124.885	140.56	144.081	127.866	132.149	130.128	136.05	129.159	137.502	132.776	399.437
same_same	Mob4	ENSMUSG00000025979	0.218758	0.000117574	0.110935	0.0260453	43.8652	44.0329	43.3503	50.835	55.396	46.9419	47.1155	47.4855	47.1909	46.0727	51.0576	47.264	144.394
same_same	Fbxo33	ENSMUSG00000035329	0.208042	0.00011783	0.240707	5.11e-06	51.848	55.0411	58.2187	65.874	65.4718	59.202	67.4139	62.6463	64.527	59.7113	63.5159	64.8624	188.09
same_same	Zfp652	ENSMUSG00000075595	-0.167508	0.000118425	-0.157683	9.63e-05	64.2658	65.5354	66.715	59.5294	58.6271	56.772	58.5717	59.5382	57.9915	63.9266	58.3095	58.7004	180.937
same_same	Mrps18b	ENSMUSG00000024436	0.266819	0.00011846	0.197168	0.00151935	21.6907	20.9456	19.1166	25.535	23.9355	24.9988	24.1709	22.9657	23.8409	21.8657	24.8231	23.6592	70.348
same_same	Pgd	ENSMUSG00000028961	0.132986	0.000118775	0.275355	1.18e-10	504.369	489.245	489.018	540.817	543.969	541.102	596.56	589.304	608.603	506.36	541.963	598.156	1646.48
same_same	Riok2	ENSMUSG00000116564	0.227899	0.000121106	0.149054	0.00461526	36.0437	38.6359	37.6539	43.0022	45.0225	43.5179	40.7581	42.8924	40.9009	39.764	43.8475	41.5171	125.129
same_same	Lrrc59	ENSMUSG00000020869	0.138391	0.000121378	0.194249	2.96e-07	246.822	239.911	249.674	275.01	267.499	267.955	284.532	274.863	283.023	254.865	270.155	280.806	805.826
same_same	Rars	ENSMUSG00000018848	0.155406	0.000122412	0.0862658	0.0162686	145.666	146.919	142.94	157.675	168.229	159.455	156.352	153.818	152.312	149.178	161.786	154.161	465.125
same_same	Zmat3	ENSMUSG00000027663	-0.160183	0.000122636	0.197002	1.56e-06	115.025	115.522	110.065	107.701	96.3797	100.769	133.601	128.539	128.563	111.096	101.616	130.234	342.947
same_same	Rnpc3	ENSMUSG00000027981	0.255484	0.000123551	0.122836	0.0354894	21.5698	21.5025	20.951	25.1434	26.9965	24.4834	23.8805	22.8966	22.9818	22.5323	25.5411	23.253	71.3263
same_same	Emsy	ENSMUSG00000035401	0.177273	0.000123764	0.0579482	0.155388	59.0648	61.0378	59.1842	68.4589	69.0856	65.3504	60.6693	63.0953	62.9008	62.8936	67.6316	62.2218	192.747
same_same	Tcp11l1	ENSMUSG00000027175	-0.235745	0.000123845	-0.00318405	0.958062	51.2433	50.7578	49.5294	44.6079	41.7489	42.3765	51.9561	49.6612	49.6763	48.2984	42.9111	50.4312	141.641
same_same	Tpm3	ENSMUSG00000027940	0.136459	0.000124151	0.241565	3.41e-09	320.039	298.893	300.845	340.728	329.017	341.369	361.983	360.855	364.763	313.488	337.038	362.534	1013.06
same_same	Eloa	ENSMUSG00000028668	0.151484	0.000124151	0.227792	6.6e-08	111.8	109.911	114.748	126.383	126.055	121.239	128.825	129.23	135.682	117.014	124.559	131.246	372.818
same_same	Plxnc1	ENSMUSG00000074785	-0.209326	0.000124151	-0.103156	0.0276377	54.9525	57.8682	60.3911	50.2476	50.0392	49.2982	53.1179	53.4255	54.4015	56.1689	49.8616	53.6483	159.679
same_same	Fmnl1	ENSMUSG00000055805	0.184302	0.000124677	0.500293	2.19e-13	364.549	361.258	358.629	426.105	399.761	406.351	493.325	518.507	522.169	381.998	410.739	511.334	1304.07
same_same	Rgs14	ENSMUSG00000052087	0.256393	0.000124922	0.449138	1.68e-09	26.3272	28.1845	26.4543	32.937	31.5455	32.215	35.7239	36.158	38.5996	29.1919	32.2325	36.8272	98.2516
same_same	Recql	ENSMUSG00000030243	-0.201421	0.000126466	-0.544798	3.16e-13	69.1442	73.1169	71.7838	63.4459	62.6659	60.0488	49.8585	47.9345	48.8171	69.4488	62.0535	48.87	180.372
same_same	Lgmn	ENSMUSG00000021190	-0.155745	0.000127917	-0.376387	3.85e-12	184.653	184.87	182.67	159.006	165.89	170.758	143.186	141.386	140.867	175.515	165.218	141.813	482.546
up_up	Upp1	ENSMUSG00000020407	0.676816	0.000127935	1.92978	2.46e-16	2.74158	2.57001	2.65508	4.1514	4.25142	4.34442	9.10039	10.913	10.4323	3.1255	4.24908	10.1486	17.5232
same_same	Pgrmc1	ENSMUSG00000006373	0.187367	0.000128191	0.336208	1.48e-09	69.2651	71.2751	69.4666	80.2473	82.2224	76.8742	86.5183	88.7892	89.81	73.663	79.7813	88.3725	241.817
same_same	Fbh1	ENSMUSG00000058594	-0.212271	0.000129168	0.0114899	0.824913	47.6147	44.1186	46.1984	40.4174	40.0909	38.658	47.5673	45.8624	45.6568	43.5781	39.7221	46.3621	129.662
same_same	Gar1	ENSMUSG00000028010	0.258577	0.000129168	0.282757	1.25e-05	34.6326	30.0692	29.7852	35.4435	37.7526	40.0939	38.8541	36.3653	39.9497	31.766	37.7633	38.3897	107.919
same_same	Paf1	ENSMUSG00000003437	0.178853	0.000129716	0.149911	0.000439196	47.8969	46.9456	44.2675	54.164	52.8876	50.7708	52.6338	51.5261	50.474	48.459	52.6075	51.5446	152.611
same_same	Fanca	ENSMUSG00000032815	-0.283582	0.000130481	-0.479162	8.74e-09	29.2704	29.1697	27.1784	23.616	22.3199	24.4098	20.9438	20.79	19.8214	26.6547	23.4486	20.5184	70.6216
same_same	Atad1	ENSMUSG00000013662	0.137497	0.000131154	0.060532	0.056075	104.18	100.016	102.631	114.79	114.108	108.795	106.042	106.816	107.146	105.812	112.564	106.668	325.045
same_same	Ipo7	ENSMUSG00000066232	0.146954	0.000131376	0.0136684	0.71251	437.322	444.227	448.95	491.235	515.314	466.731	456.181	438.386	448.498	461.471	491.094	447.688	1400.25
same_same	Med13	ENSMUSG00000034297	0.161506	0.00013385	0.0689093	0.0661426	167.438	172.405	170.022	192.374	198.244	179.889	177.748	179.478	177.564	178.267	190.169	178.263	546.699
same_same	Mocs1	ENSMUSG00000064120	-0.326283	0.000133935	-0.140007	0.0519589	23.8275	25.1005	25.3922	19.7387	18.2811	21.0226	22.1701	23.1729	22.0613	23.4105	19.6808	22.4681	65.5594
same_same	Rfc2	ENSMUSG00000023104	-0.177307	0.00013417	-0.384292	4.67e-11	59.0245	57.7825	54.3085	48.3285	50.5494	52.6117	43.0494	45.0335	43.2941	53.4732	50.4965	43.7923	147.762
same_same	Cstf2	ENSMUSG00000031256	0.144347	0.000134267	0.0261568	0.452	91.7218	93.3343	95.583	105.038	105.69	99.4431	96.49	95.1437	93.983	97.9852	103.391	95.2055	296.581
same_same	Galnt6	ENSMUSG00000037280	-0.21382	0.000134267	-0.558445	8.24e-13	58.6213	55.0411	55.6119	50.6	46.383	48.9668	37.7892	38.0575	39.1519	53.751	48.6499	38.3329	140.734
same_same	Dgke	ENSMUSG00000000276	0.200614	0.000134267	-0.144842	0.00275635	39.5109	37.1795	36.7367	43.3938	43.9172	43.2601	34.7235	33.1535	34.7949	39.1034	43.5237	34.224	116.851
same_same	Seh1l	ENSMUSG00000079614	0.160566	0.000134844	-0.000266625	0.995357	76.1997	74.8302	78.7353	86.866	85.5811	84.2376	76.3207	74.9753	78.1811	80.1438	85.5616	76.4923	242.198
same_same	Rasgrp3	ENSMUSG00000071042	0.201702	0.000135368	-0.117037	0.0137314	355.679	359.588	352.305	407.855	416.639	403.442	326.226	326.182	331.993	373.249	409.312	328.134	1110.7
same_same	Gripap1	ENSMUSG00000031153	0.178884	0.000135368	0.193487	2.13e-05	167.518	165.894	169.298	194.45	195.055	179.741	188.752	195.847	190.267	176.547	189.749	191.622	557.918
down_same	Nod1	ENSMUSG00000038058	-0.518611	0.000135758	-0.0499386	0.671724	8.42631	8.35255	7.14459	5.87462	5.35679	5.52257	7.74501	8.77187	6.78101	7.12392	5.58466	7.76596	20.4745
same_same	Tmpo	ENSMUSG00000019961	-0.160475	0.000136294	-0.329286	1.84e-10	336.569	335.644	360.753	312.451	316.731	294.942	281.112	263.916	276.733	336.283	308.041	273.92	918.244
same_same	Rbm39	ENSMUSG00000027620	0.144692	0.000136586	0.0560157	0.0963354	201.546	200.847	206.276	220.768	237.144	215.159	206.405	218.295	208.064	209.297	224.357	210.921	644.575
same_same	Msh3	ENSMUSG00000014850	-0.306293	0.000138253	-0.6972	2.56e-11	24.3516	26.1285	24.6199	18.6813	19.9817	21.9798	16.0064	15.8515	14.5132	23.1432	20.2143	15.457	58.8145
same_same	Snapc3	ENSMUSG00000028483	0.214396	0.000138584	0.347546	1.14e-08	35.7211	34.481	35.6264	42.8064	40.1759	39.7993	46.3733	45.0681	43.2635	37.6379	40.9272	44.9016	123.467
same_same	Tmem94	ENSMUSG00000020747	-0.310997	0.000138971	-0.237516	0.00105487	25.5208	26.3426	27.8542	23.0285	21.002	20.139	22.8478	22.0333	22.5829	25.7418	21.3898	22.488	69.6196
up_same	Gm18445	ENSMUSG00000103588	1.41619	0.000141827	1.5651	8.01e-06	0.645077	0.471169	0.33792	1.05743	1.61554	1.32542	1.35538	1.72675	1.35007	0.622173	1.3328	1.4774	3.43237
same_down	Osgin1	ENSMUSG00000074063	0.453566	0.000141927	-0.0800322	0.489829	8.99076	8.05271	9.12383	11.2401	11.8615	12.6651	7.35776	8.42652	8.92884	9.47221	11.9222	8.23771	29.6321
same_same	Mllt6	ENSMUSG00000038437	-0.160557	0.00014223	-0.163759	4.34e-05	92.891	92.8203	95.583	85.0253	81.3296	85.0476	84.5175	84.6796	81.8631	91.1429	83.8008	83.6867	258.63
same_same	Acaa1a	ENSMUSG00000036138	-0.214015	0.000143274	0.00278062	0.960219	50.195	49.8583	49.4328	44.4513	39.8358	44.4015	51.1494	51.5261	47.283	47.9141	42.8962	49.9861	140.796
same_same	Pax6	ENSMUSG00000027168	-0.308424	0.000143745	-0.194555	0.00563168	22.6986	22.7446	21.0958	18.6421	16.8781	18.2245	19.7821	17.8891	20.4658	20.8275	17.9149	19.379	58.1214
same_same	S1pr2	ENSMUSG00000043895	-0.298497	0.00014397	-0.315838	2.35e-05	24.6339	26.3426	24.2819	22.0494	19.1314	19.9917	19.7175	21.2735	19.576	24.2247	20.3908	20.189	64.8045
same_up	Atp10d	ENSMUSG00000046808	-0.240228	0.000145325	0.277036	2.63e-06	39.1884	38.1219	39.6814	34.4253	33.6287	31.0737	46.6314	48.1071	47.0068	37.4095	33.0425	47.2485	117.701
same_same	Kcmf1	ENSMUSG00000055239	0.13492	0.000146289	0.208957	5.28e-08	145.505	140.28	136.906	150.86	156.665	156.878	163	161.313	164.493	142.682	154.801	162.935	460.418
same_same	Tmem154	ENSMUSG00000056498	-0.281608	0.000147443	-0.273049	7.5e-05	22.3761	22.3163	20.5165	17.6238	17.6434	18.4454	19.0398	17.4747	17.5509	20.1522	17.9042	18.0218	56.0782
same_same	Ero1l	ENSMUSG00000021831	0.144707	0.000148681	0.301451	1.02e-10	122.323	121.262	125.079	134.92	138.384	134.235	150.447	149.191	154.49	127.087	135.846	151.376	414.309
same_same	Ampd3	ENSMUSG00000005686	-0.154503	0.000148681	-0.339367	4.27e-11	113.13	113.209	105.431	102.179	95.2318	100.769	89.5517	88.2367	84.7473	106.94	99.3932	87.5119	293.845
same_down	Camk2d	ENSMUSG00000053819	0.263062	0.000148995	-0.639125	3.02e-11	29.0285	30.5403	27.9991	34.3078	36.2221	34.7554	18.5235	19.0633	18.7168	30.949	35.0951	18.7679	84.812
same_same	Pmp22	ENSMUSG00000018217	-0.176912	0.000149405	-0.675335	1.19e-16	115.953	109.226	106.348	95.8346	99.2281	98.5595	69.7051	70.3476	67.8408	103.803	97.8741	69.2978	270.975
same_same	Septin11	ENSMUSG00000058013	0.140821	0.000150641	-0.00980672	0.787913	221.785	230.659	226.503	248.81	257.253	242.588	222.217	228.379	223.743	235.324	249.55	224.78	709.654
same_same	Rab40c	ENSMUSG00000025730	-0.287775	0.000150641	-0.21806	0.00121752	29.9961	30.2405	28.2887	24.4384	22.8301	25.2197	26.7203	25.3832	24.1478	27.6559	24.1628	25.4171	77.2357
same_same	Ccdc88a	ENSMUSG00000032740	0.182267	0.000151713	0.153387	0.00051965	89.5447	91.0213	92.3969	101.67	110.579	97.7495	103.17	102.431	97.9411	95.0294	103.333	101.181	299.543
same_same	Prr13	ENSMUSG00000023048	0.214484	0.000152028	0.421817	1.83e-10	30.8427	29.5123	28.9645	33.9161	34.5215	35.3076	39.0478	39.5079	41.2077	30.7977	34.5818	39.9211	105.301
same_up	Mgl2	ENSMUSG00000040950	0.475345	0.000152137	1.68357	8.55e-18	16.8929	15.4201	13.3237	22.4019	20.1092	21.2435	48.0836	52.7003	46.8841	17.0485	21.2515	49.2227	87.5227
same_same	Senp6	ENSMUSG00000034252	0.174859	0.000152846	0.153626	0.00032352	91.238	90.85	98.1415	106.017	109.517	100.695	103.299	104.641	103.433	98.3363	105.41	103.791	307.537
same_same	Rrp12	ENSMUSG00000035049	0.188984	0.000153099	0.128813	0.00384549	50.316	51.3575	49.5294	57.5712	57.3942	57.4716	54.0537	56.0502	55.322	52.8194	57.479	55.142	165.44
down_same	Slc26a11	ENSMUSG00000039908	-0.68613	0.000154566	-0.482095	0.00190552	4.67681	4.41186	4.58605	3.0548	2.29577	3.09264	3.22709	3.14268	3.40585	4.01757	2.8144	3.25854	10.0905
same_same	Ywhaz	ENSMUSG00000022285	0.150938	0.000155654	0.124376	0.000764433	253.394	261.328	254.26	290.206	289.139	274.582	273.722	282.944	281.581	268.598	284.642	279.416	832.656
same_same	Fgd3	ENSMUSG00000037946	0.180029	0.000157013	0.242688	5.95e-07	71.9664	72.6886	69.9976	82.4796	80.862	80.0036	84.1302	82.5384	87.3247	75.0553	81.1151	84.6644	240.835
same_same	Eef1e1	ENSMUSG00000001707	0.231908	0.000157013	0.312126	5.59e-07	54.6299	50.3723	50.2535	62.7017	62.1983	57.8765	67.4462	62.6118	62.9622	54.4425	60.9255	64.34	179.708
same_same	Ncoa1	ENSMUSG00000020647	-0.223314	0.000157013	-0.0932646	0.0656288	49.7112	51.4431	49.1432	44.8429	42.0465	41.8979	48.1159	49.5921	43.4476	48.4764	42.9291	47.0519	138.457
same_same	Flrt2	ENSMUSG00000047414	0.179384	0.000157067	-0.310028	1.07e-08	214.004	221.749	225.682	240.546	265.544	242.993	171.294	180.928	181.124	229.326	249.694	177.782	656.802
same_same	Mtr	ENSMUSG00000021311	-0.163281	0.000158203	-0.0939746	0.012538	63.2982	63.3509	63.5289	58.8637	57.1816	53.9003	60.8629	59.1583	58.1756	61.9145	56.6485	59.3989	177.962
same_same	Nfic	ENSMUSG00000055053	0.149338	0.000158817	-0.154816	5.42e-05	162.68	172.748	164.181	181.878	188.253	184.086	145.122	150.745	152.895	172.936	184.739	149.587	507.262
same_up	Ggta1	ENSMUSG00000035778	-0.202666	0.000160229	0.344598	2.7e-09	59.9115	63.051	62.2738	54.9081	51.3571	54.4526	77.3533	77.7381	79.93	60.0776	53.5726	78.3405	191.991
same_same	Bard1	ENSMUSG00000026196	-0.254479	0.00016086	-0.468232	2.24e-09	38.624	43.3904	38.6194	34.9344	33.4587	32.8041	29.5279	28.7676	28.9344	38.9814	33.7324	29.0766	101.79
same_same	Kctd12	ENSMUSG00000098557	0.350942	0.000164251	0.615595	1.73e-09	9.87774	10.2372	10.041	12.415	12.9243	13.1069	15.3932	15.4371	15.3723	10.8978	12.8154	15.4009	39.1141
same_same	Hmg20a	ENSMUSG00000032329	-0.201124	0.000164291	-0.175595	0.000309859	43.8249	45.8319	43.833	40.2607	37.5825	38.253	40.4032	39.9224	37.9553	43.3085	38.6988	39.4269	121.434
same_same	Cers6	ENSMUSG00000027035	0.14143	0.000164637	0.418481	3.08e-14	167.276	169.749	167.946	192.452	184.512	180.073	220.83	230.313	223.835	176.716	185.679	224.993	587.387
same_same	L3mbtl2	ENSMUSG00000022394	-0.17456	0.000164819	-0.204954	6.42e-06	55.396	56.6688	56.0464	50.9133	48.7213	49.2613	47.0832	47.8308	50.8116	54.5428	49.632	48.5752	152.75
same_same	Gusb	ENSMUSG00000025534	-0.128234	0.000167152	-0.273957	1.12e-10	582.262	571.914	576.877	535.06	524.54	524.239	484.321	467.706	479.611	561.284	527.946	477.213	1566.44
same_same	Wapl	ENSMUSG00000041408	0.137244	0.000167454	0.102208	0.00211021	188.161	194.85	187.883	208.784	218.48	200.911	206.114	201.891	204.811	197.172	209.392	204.272	610.836
same_same	Crip2	ENSMUSG00000006356	0.374626	0.00016752	0.436064	6.07e-06	10.5631	11.5222	9.94449	13.355	14.3698	13.9169	14.3605	14.9536	14.145	11.6072	13.8805	14.4864	39.9742
same_same	Ncapd3	ENSMUSG00000035024	-0.137262	0.000170468	-0.407693	4.65e-14	92.6491	91.8352	96.3071	86.0827	83.2003	85.7471	71.5446	68.4482	71.4307	91.4083	85.01	70.4745	246.893
same_same	Fmnl3	ENSMUSG00000023008	0.231886	0.000170468	0.259421	1.29e-05	47.01	49.9011	42.8192	55.848	53.9505	54.6366	55.3446	55.394	56.8562	49.5228	54.8117	55.8649	160.199
same_same	Inpp1	ENSMUSG00000026102	0.326676	0.000171408	0.583348	1.53e-09	19.8764	17.9473	19.4545	23.0285	25.7211	23.2316	30.4314	27.4553	27.9218	20.1434	23.9937	28.6028	72.74
same_same	Ankrd12	ENSMUSG00000034647	-0.227578	0.000172097	-0.404985	4.53e-09	41.7284	44.6326	44.895	36.1876	39.8358	36.1176	33.8522	33.0154	32.1561	41.9051	37.3803	33.0079	112.293
same_same	Ddx42	ENSMUSG00000020705	0.137086	0.000172637	-0.0223101	0.513472	96.1164	99.5024	97.7553	104.333	111.982	106.438	94.941	97.2848	96.6217	100.53	107.585	96.2825	304.397
same_same	Stx6	ENSMUSG00000026470	0.164096	0.000172679	0.208949	1.68e-06	47.0503	45.1466	46.4881	51.775	53.5254	50.2554	53.4729	53.391	53.4503	47.8032	51.8519	53.4381	153.093
same_same	Snx24	ENSMUSG00000024535	-0.307611	0.000173388	-0.356049	8.25e-06	25.7628	28.827	27.4198	21.8536	20.9595	23.2684	21.0729	21.8951	21.0794	26.0334	22.0272	21.3492	69.4098
same_same	Oga	ENSMUSG00000025220	0.128499	0.000174516	0.0344353	0.26695	201.425	210.827	210.62	227.152	233.7	220.056	211.407	214.911	211.469	216.2	226.969	212.596	655.765
same_same	Wdfy2	ENSMUSG00000014547	-0.128157	0.000176388	-0.0456707	0.12951	157.278	165.338	162.539	146.513	149.437	147.894	153.48	161.796	154.767	158.13	147.948	156.681	462.759
same_same	Abr	ENSMUSG00000017631	-0.126945	0.000176671	-0.54341	6.18e-18	438.168	445.469	436.303	409.382	396.657	402.706	299.151	298.589	307.907	430.385	402.915	301.882	1135.18
same_same	Tob2	ENSMUSG00000048546	-0.172446	0.000176671	-0.103746	0.0101044	82.6505	78.8994	80.1835	72.5711	68.8305	73.0084	72.9967	76.2531	75.8185	77.218	71.47	75.0228	223.711
up_down	Id2	ENSMUSG00000020644	0.522994	0.000176929	-0.774623	2.42e-06	12.7806	12.9357	13.5168	17.9372	19.514	18.8872	7.4223	8.04663	7.45604	14.7966	18.7795	7.64166	41.2177
same_same	Fhod1	ENSMUSG00000014778	0.306208	0.000177316	0.451701	9.91e-08	15.1996	14.3064	15.0616	19.1121	18.026	17.9668	20.7179	20.272	19.9748	16.16	18.3683	20.3216	54.8499
same_same	Fkbp5	ENSMUSG00000024222	-0.126396	0.000177351	0.0796172	0.00716977	115.025	114.88	116.631	105.234	102.374	109.568	119.467	122.772	123.869	112.248	105.725	122.036	340.009
same_same	Riok3	ENSMUSG00000024404	0.11851	0.000177552	0.116703	0.000100722	142.239	142.55	145.209	156.343	154.879	155.479	154.093	158.066	154.03	148.034	155.567	155.397	458.998
same_same	Ctsb	ENSMUSG00000021939	-0.113845	0.000177609	-0.267476	1.48e-11	2748.63	2712.35	2616.85	2479.68	2436.66	2548.59	2268.97	2197.56	2244.36	2602.96	2488.31	2236.96	7328.23
up_same	Maff	ENSMUSG00000042622	0.520789	0.000179958	0.491173	0.000135742	6.5314	7.88138	6.3722	9.39939	10.501	10.0143	9.35856	9.70431	10.1869	7.88432	9.97155	9.74991	27.6058
same_same	Haus4	ENSMUSG00000022177	-0.33846	0.000181127	-0.469087	5.27e-07	16.0463	17.5189	16.0753	12.5325	14.1572	12.6651	12.7147	10.9821	12.1199	15.3756	13.1183	11.9389	40.4328
same_same	Rbm34	ENSMUSG00000033931	0.296746	0.000181389	0.175551	0.0125519	14.5545	14.9061	14.0478	17.1539	18.4937	17.8931	16.4259	16.7149	16.0781	15.3693	17.8469	16.4063	49.6224
same_same	Foxo3	ENSMUSG00000048756	-0.183569	0.000181906	0.102063	0.0158751	92.891	96.8467	96.645	83.8112	85.2835	83.0227	101.556	103.812	101.899	92.4343	84.0391	102.423	278.896
same_same	Phf13	ENSMUSG00000047777	-0.279366	0.00018198	-0.329022	6.66e-06	19.5942	19.2751	19.6476	16.9972	15.2626	15.905	16.2	14.7809	15.5564	18.64	16.0549	15.5125	50.2074
up_same	Ubtd2	ENSMUSG00000044949	0.501631	0.00018198	0.162058	0.186263	5.64442	4.66886	4.58605	6.34459	7.14238	7.69478	5.0988	5.66372	5.98325	5.19983	7.06058	5.58192	17.8423
same_same	Slc7a1	ENSMUSG00000041313	0.165594	0.000182944	-0.116402	0.00397389	340.036	351.578	331.837	385.179	376.378	386.433	313.221	312.472	318.493	356.198	382.663	314.729	1053.59
same_same	Dnaja1	ENSMUSG00000028410	0.181891	0.000185563	0.178657	9.32e-05	62.129	61.252	59.329	69.7513	69.6808	68.0749	72.7386	65.1328	68.9761	63.4441	69.169	68.9492	201.562
same_same	Ruvbl1	ENSMUSG00000030079	0.19564	0.000185753	0.133677	0.00419862	35.3986	35.509	35.6747	41.0831	40.9837	40.0202	40.1773	36.089	40.4713	37.4223	40.6957	38.9125	117.03
same_same	Fam122b	ENSMUSG00000036022	-0.347055	0.000185753	-0.395931	1.07e-05	12.6596	13.6211	12.7444	10.6135	10.7561	9.38837	10.2944	9.56617	9.78798	12.3263	10.2526	9.88285	32.4618
same_same	Atad5	ENSMUSG00000017550	-0.221297	0.000187399	-0.56569	2.64e-12	55.9201	60.1383	60.8255	48.681	54.6732	48.4514	40.4354	39.3353	39.5508	56.5483	50.6019	39.7738	146.924
same_same	Esyt2	ENSMUSG00000021171	0.152203	0.000188745	0.106031	0.00400282	141.635	146.277	155.974	169.816	166.188	156.951	161.064	155.994	160.136	157.355	164.318	159.065	480.739
same_same	Taf6l	ENSMUSG00000003680	-0.327251	0.000189028	-0.495178	1.24e-07	17.6187	16.4909	16.1719	14.1774	11.6914	14.1378	11.3916	12.3635	11.9972	15.6134	13.3355	11.9174	40.8664
same_same	Wdfy4	ENSMUSG00000051506	-0.133227	0.000195672	-0.0198989	0.552995	273.996	276.705	277.673	259.736	247.305	248.184	267.3	278.904	270.842	271.372	251.742	272.348	795.462
same_same	Nsl1	ENSMUSG00000062510	-0.288935	0.000195891	-0.571844	8.06e-10	28.8672	28.3558	28.337	23.2635	22.1499	24.5202	18.943	19.2359	19.3919	26.6521	23.3112	19.1903	69.1536
same_same	Ttpal	ENSMUSG00000017679	0.166247	0.000196015	0.157261	0.000160461	66.201	69.0049	64.8806	76.4875	73.0819	74.9965	72.3513	74.9407	75.9412	70.1243	74.8553	74.4111	219.391
same_same	Lrrfip1	ENSMUSG00000026305	0.170931	0.000196308	0.135383	0.0013233	190.983	184.356	186.387	209.645	221.074	202.052	200.596	207.589	208.892	193.463	210.924	205.692	610.079
same_same	P2ry6	ENSMUSG00000048779	0.270528	0.000197909	0.283615	4.02e-05	49.2677	48.4019	47.6949	60.2344	59.5624	55.8148	56.5386	59.7799	60.7223	52.1104	58.5372	59.0136	169.661
same_same	Inppl1	ENSMUSG00000032737	0.147927	0.000197925	0.302112	3.02e-10	183.565	182.385	175.96	206.552	198.881	195.241	217.054	222.75	228.529	188.299	200.225	222.778	611.301
up_same	Fosl1	ENSMUSG00000024912	1.31536	0.000197925	1.36805	3.63e-05	0.483808	0.556836	0.675839	1.25325	1.488	1.5095	1.03267	1.72675	1.6569	0.828642	1.41692	1.4721	3.71766
same_same	Cyth2	ENSMUSG00000003269	0.207358	0.00020175	0.0919076	0.0623478	43.9055	43.8187	40.4055	48.6027	50.1667	49.4822	44.5984	46.8639	45.4113	44.2756	49.4172	45.6245	139.317
same_same	Necap1	ENSMUSG00000030327	-0.129514	0.000202115	-0.142091	2.54e-05	135.627	137.667	137.34	124.777	124.099	126.393	122.21	126.778	123.163	133.261	125.09	124.05	382.401
same_same	Fubp1	ENSMUSG00000028034	0.155853	0.000203413	0.106177	0.00533374	295.848	299.535	301.521	345.349	344.62	309.411	314.835	327.874	322.666	315.468	333.127	321.792	970.387
same_same	Nagk	ENSMUSG00000034744	-0.173601	0.000203683	-0.365277	1.85e-10	60.0325	60.5238	58.0256	51.9316	53.6104	52.943	47.5027	44.3774	46.7614	56.827	52.8283	46.2138	155.869
same_same	Slc38a7	ENSMUSG00000036534	-0.257256	0.000203683	-0.423293	2.84e-08	29.351	31.2257	29.1094	25.6133	23.893	25.4775	21.2988	22.5513	23.0432	28.6495	24.9946	22.2977	75.9418
same_same	Strn3	ENSMUSG00000020954	0.177239	0.000204872	0.163889	0.000222846	68.4588	70.3756	73.763	84.2812	79.8842	76.0274	80.5159	78.6015	78.7334	76.1399	80.0642	79.2836	235.488
same_same	Wdr7	ENSMUSG00000040560	-0.199426	0.000205849	-0.539035	8.12e-13	60.1937	63.4794	61.26	52.4016	52.8451	55.6675	45.6633	42.5815	39.1212	59.047	53.6381	42.4554	155.14
same_same	Bcl10	ENSMUSG00000028191	0.183855	0.000208605	0.120675	0.00636648	48.6227	52.771	53.3913	58.9028	58.6696	57.987	55.4737	55.7739	56.7334	55.0217	58.5198	55.9937	169.535
same_same	Efcab14	ENSMUSG00000034210	-0.146383	0.000209611	-0.110049	0.00193464	87.4482	88.6227	90.4176	81.4613	77.0782	81.9181	81.9681	81.8823	82.9063	86.8339	80.1526	82.2522	249.239
same_same	Zfp948	ENSMUSG00000067931	0.21708	0.000210433	0.205924	0.000155667	35.7211	35.9374	37.7987	42.8064	43.1094	41.2352	42.533	42.6161	40.9929	38.8475	42.3837	42.0473	123.278
same_same	Hsp90ab1	ENSMUSG00000023944	0.107457	0.000214257	0.174797	4.92e-08	1558.47	1540.6	1516.82	1644.5	1677.78	1650.62	1726.82	1721.15	1762.51	1567.31	1657.63	1736.83	4961.77
same_same	Slain2	ENSMUSG00000036087	0.150749	0.000214666	-0.0853011	0.019905	139.175	141.693	138.354	157.675	160.959	147.121	129.697	132.2	133.288	145.907	155.252	131.728	432.887
same_same	Slc12a7	ENSMUSG00000017756	-0.198662	0.000214666	0.0369317	0.438893	66.8461	66.1779	59.7152	57.0229	53.4403	57.6556	65.5744	66.6178	65.9998	60.972	56.0396	66.064	183.076
same_same	Nqo2	ENSMUSG00000046949	-0.180521	0.000216107	0.117408	0.00517029	51.0417	49.5156	51.0741	45.2737	43.1519	45.2483	54.9573	53.4255	55.997	48.6212	44.558	54.7933	147.972
same_same	Gls	ENSMUSG00000026103	0.155048	0.000216204	0.171461	2.8e-05	227.833	230.059	240.406	267.804	268.945	240.821	261.362	261.395	263.416	246.09	259.19	262.058	767.337
same_same	Fam168a	ENSMUSG00000029461	-0.160596	0.000216662	0.0047674	0.91004	68.8216	67.2487	73.232	62.3493	63.006	61.7055	70.5442	69.4842	69.6818	67.61	62.3536	69.9034	199.867
same_same	Cd52	ENSMUSG00000000682	0.216634	0.000216945	0.493337	1.68e-11	73.9016	68.8764	69.8045	80.8739	79.7141	86.4098	97.8453	98.908	102.666	73.1849	82.3326	99.8066	255.324
same_same	Dguok	ENSMUSG00000014554	-0.327316	0.00021746	0.0383624	0.623874	13.6676	12.9357	13.9995	11.1618	11.0962	10.1247	13.6506	14.0212	13.9916	12.699	10.7942	13.8878	37.381
same_same	Kdm3b	ENSMUSG00000038773	-0.135736	0.000217535	-0.221601	3.79e-08	141.272	139.209	137.823	127.557	128.308	125.068	121.629	118.455	118.744	134.863	126.978	119.609	381.45
same_same	Atp6ap2	ENSMUSG00000031007	0.154928	0.00021818	0.0204521	0.607195	159.455	155.1	164.857	174.045	186.807	172.967	162.871	159.275	163.849	164.667	177.94	161.998	504.606
same_same	Marchf7	ENSMUSG00000026977	0.200851	0.000218502	0.0866993	0.0725448	78.7397	83.8681	81.0042	93.6414	98.888	87.7721	84.0657	87.9259	86.6803	86.1712	93.4338	86.224	265.829
same_same	Ppp4r1	ENSMUSG00000061950	0.165296	0.000221366	0.0690034	0.0821728	92.0444	86.224	91.2383	102.101	98.9305	101.1	92.9402	94.1767	95.5478	93.1877	100.71	94.2216	288.12
same_same	Hltf	ENSMUSG00000002428	-0.198064	0.000221595	-0.081303	0.0788704	55.0331	53.8418	55.274	49.5426	48.1261	45.506	53.3115	50.1792	51.5786	52.8861	47.7249	51.6898	152.301
up_up	Scimp	ENSMUSG00000057135	1.34526	0.000226702	1.99159	2.36e-08	0.564442	0.771004	0.386194	1.68406	1.57302	1.21497	2.22669	2.52105	2.23988	0.947085	1.49068	2.32921	4.76697
same_same	Dennd1a	ENSMUSG00000035392	-0.18843	0.000227247	-0.190802	7.01e-05	36.6484	37.8649	36.785	32.0362	33.2886	32.3991	33.949	32.5664	31.0515	35.562	32.5746	32.5223	100.659
same_same	Ncapd2	ENSMUSG00000038252	-0.139406	0.000228895	-0.315641	5.01e-11	251.661	254.089	245.957	225.468	224.39	232.611	207.437	199.784	196.895	241.838	227.489	201.372	670.7
same_same	Dnajc3	ENSMUSG00000022136	0.127674	0.000228895	-0.119811	0.000264657	179.573	175.832	182.621	196.604	200.624	190.639	168.164	163.523	163.358	185.019	195.956	165.015	545.99
same_same	Hif1a	ENSMUSG00000021109	0.183018	0.000230361	0.249709	8.96e-07	91.9638	90.6358	90.5142	106.213	107.816	96.4241	107.236	105.297	112.117	95.7877	103.484	108.217	307.489
same_same	Cd302	ENSMUSG00000060703	-0.221398	0.000230419	-0.182194	0.000783714	44.5506	44.2471	45.8122	35.7177	40.0484	39.6521	40.4032	37.4704	40.5633	41.9257	38.4727	39.479	119.877
same_same	Nol11	ENSMUSG00000018433	0.150804	0.000231741	0.00594559	0.883299	68.4185	64.9785	71.3493	76.9966	73.2094	76.7269	70.1246	67.6884	67.5646	71.1082	75.6443	68.4592	215.212
down_same	Sh2d3c	ENSMUSG00000059013	-0.59216	0.000234723	-0.457755	0.00116217	6.00728	6.21087	6.13083	3.36811	4.33645	4.45487	4.71155	3.93698	4.66386	5.2366	4.05314	4.43746	13.7272
same_same	Fam53a	ENSMUSG00000037339	-0.216382	0.000235858	-0.0061179	0.921164	33.5037	34.5667	35.8678	29.6081	29.3773	30.3005	33.0777	34.9493	35.3165	33.3475	29.762	34.4478	97.5573
same_same	Tshz3	ENSMUSG00000021217	0.211253	0.000235858	0.156292	0.00249213	29.0285	29.6408	27.9991	34.1511	33.7137	32.62	30.8832	32.0829	33.6596	30.597	33.4949	32.2086	96.3005
same_same	Camk1d	ENSMUSG00000039145	-0.170573	0.000237844	-0.232023	1.08e-06	97.8904	95.6045	96.2588	83.9678	85.411	88.0298	82.323	83.3673	81.1267	91.9437	85.8029	82.2723	260.019
same_same	Myef2	ENSMUSG00000027201	0.173994	0.000239452	0.139173	0.00128342	78.3768	82.5831	81.5835	90.8607	96.2521	86.7044	89.6163	89.549	87.8463	85.0091	91.2724	89.0039	265.285
same_same	Ppig	ENSMUSG00000042133	0.171978	0.000240302	0.0197707	0.658498	106.155	112.695	107.121	122.662	131.114	113.949	112.27	108.232	109.938	114.159	122.575	110.147	346.881
same_same	Rif1	ENSMUSG00000036202	-0.160702	0.000241104	-0.255875	7.11e-08	132.805	134.412	136.568	124.464	123.121	113.765	114.82	113.033	110.245	131.814	120.45	112.699	364.963
down_down	Gm34425	ENSMUSG00000111094	-0.689784	0.000244257	-1.71534	8.48e-11	4.71712	4.06919	3.86194	2.46734	2.76342	2.65083	1.19402	1.58861	1.1046	3.46616	2.6272	1.29574	7.3891
same_same	Paics	ENSMUSG00000029247	-0.121077	0.000244381	-0.243084	7.64e-10	228.72	222.049	224.668	203.223	210.19	207.759	194.916	184.934	190.82	216.647	207.057	190.223	613.927
same_same	Ubr7	ENSMUSG00000041712	-0.198861	0.000245782	-0.32849	3.37e-08	46.4455	48.5304	50.881	43.903	42.0465	40.9407	39.435	37.7812	38.6917	47.7715	42.2967	38.636	128.704
same_same	Ppan	ENSMUSG00000004100	0.162916	0.000246761	0.0884046	0.0246672	61.3226	57.9967	59.9566	67.7931	68.1077	64.9823	62.6701	64.9947	63.0542	61.9154	66.961	63.573	192.449
same_same	Tbkbp1	ENSMUSG00000038517	0.201863	0.000246901	0.372407	2.22e-09	59.5083	56.626	57.2532	68.8897	67.2149	63.5832	72.4159	76.8747	75.3582	60.923	66.5626	74.8829	202.368
same_same	Hnrnpa1	ENSMUSG00000046434	0.13084	0.000247257	-0.00492185	0.890532	257.063	253.875	240.695	266.864	282.209	274.288	251.81	247.304	250.192	253.811	274.454	249.769	778.034
same_same	Zmym2	ENSMUSG00000021945	0.19617	0.000248638	0.11355	0.0170447	60.9598	61.2948	58.0739	65.3257	74.5274	67.2649	66.833	63.5788	64.8338	61.5648	69.0393	65.0819	195.686
same_same	Rapgef6	ENSMUSG00000037533	-0.151315	0.00024954	-0.124601	0.000976555	112.969	116.679	119.286	107.936	104.032	102.057	106.946	103.708	109.079	114.634	104.675	106.578	325.886
same_same	Tia1	ENSMUSG00000071337	-0.190706	0.000252762	-0.001057	0.98538	61.0404	66.0065	64.1082	57.9629	57.1391	52.4644	63.1219	65.6509	62.2258	62.6925	55.8555	63.6662	182.214
same_same	Snap47	ENSMUSG00000009894	-0.244716	0.000252821	-0.017552	0.77794	24.4726	24.715	24.1854	20.4828	21.5122	20.0285	23.7514	23.9672	24.7614	23.1277	20.6745	24.16	67.9623
same_same	Ddi2	ENSMUSG00000078515	-0.147317	0.000254255	-0.17671	9.04e-06	135.829	140.451	134.154	128.145	119.762	122.675	120.693	121.321	121.199	134.25	123.527	121.071	378.849
same_same	Gm13710	ENSMUSG00000087362	-0.479112	0.000254255	-0.721025	2.51e-07	8.8698	7.79571	8.44799	5.91378	5.95199	6.14846	5.80876	4.86942	4.57181	7.38583	6.00474	5.08333	18.4739
same_same	Rab11a	ENSMUSG00000004771	0.136202	0.000254651	0.335765	3.92e-12	73.3372	72.2602	73.4734	79.1507	82.0099	79.6723	91.972	89.4109	94.9342	74.9614	80.2776	92.1057	247.345
same_same	Ints6	ENSMUSG00000035161	0.181795	0.000254651	-0.100554	0.0250892	55.1541	56.4546	56.2395	64.6991	63.8563	61.8528	51.2462	52.0096	53.2049	59.1311	63.4694	52.1535	174.754
same_same	Arhgap25	ENSMUSG00000030047	0.361944	0.000255846	0.36408	9.54e-05	53.0979	53.9275	50.2535	66.9706	70.7436	64.9086	66.0585	68.0683	68.5465	57.0505	67.541	67.5578	192.149
same_same	Ewsr1	ENSMUSG00000009079	0.122136	0.000256486	-0.198274	7.01e-08	234.929	230.016	224.62	240.703	256.488	253.56	199.434	204.723	197.11	231.78	250.25	200.422	682.452
same_same	Mbtps1	ENSMUSG00000031835	-0.125802	0.000256486	-0.274726	1.22e-10	109.623	107.684	107.748	99.751	99.7383	98.5227	89.3904	91.4484	87.9997	105.061	99.3373	89.6128	294.011
same_same	Npat	ENSMUSG00000033054	-0.225094	0.000256657	-0.306031	1.15e-06	57.0893	58.2108	59.0877	50.1301	52.6326	46.6105	44.792	47.2783	48.8478	55.8095	49.791	46.9727	152.573
same_same	Dnm1	ENSMUSG00000026825	-0.282098	0.000260717	-0.148855	0.0249571	24.0694	27.1993	24.6199	22.2844	19.599	20.4703	23.3641	22.8621	22.2454	24.7012	20.7846	22.8239	68.3096
same_same	Fam120c	ENSMUSG00000025262	-0.268225	0.000262791	-0.101138	0.107919	22.2148	23.43	24.9578	19.6604	20.0242	18.8504	22.9123	21.5498	21.2022	22.6827	19.5116	21.8881	64.0824
same_same	Ift140	ENSMUSG00000024169	-0.269322	0.0002655	-0.557951	5.19e-10	36.3259	33.967	32.0541	28.629	26.9965	29.3801	24.9454	21.9642	22.7363	31.55	28.3352	23.2153	83.1005
same_same	Chek1	ENSMUSG00000032113	-0.243267	0.000266511	-0.502018	5.25e-10	34.4713	35.3805	33.454	28.9031	31.0354	27.576	25.0745	22.724	25.0989	32.5792	29.1715	24.2991	86.0499
up_up	Dnmt3l	ENSMUSG00000000730	0.635436	0.000267043	1.27876	5.39e-11	2.53999	2.31301	2.07579	3.56393	4.25142	3.09264	5.97011	5.69826	5.27753	2.65091	3.636	5.64863	11.9355
same_same	Incenp	ENSMUSG00000024660	-0.135036	0.000268541	-0.323628	1.85e-11	242.065	230.659	228.965	214.58	214.697	210.005	189.527	184.52	186.8	224.735	213.094	186.949	624.777
same_same	Gpr183	ENSMUSG00000051212	-0.478648	0.000269922	-0.262596	0.0184786	9.07139	9.08072	8.44799	6.07044	6.12204	6.88481	7.6482	7.39047	7.17989	7.86638	6.3591	7.40619	21.6317
same_same	Vta1	ENSMUSG00000019868	0.230948	0.000272274	0.131815	0.019241	33.1811	31.7397	32.0541	37.0492	40.601	36.449	36.8211	35.2601	34.2733	33.6143	38.0331	35.4515	107.099
up_down	Lamc2	ENSMUSG00000026479	0.924584	0.000272902	-0.260402	0.335537	1.57237	1.84184	1.25513	2.31068	3.52868	3.12946	1.25856	1.41593	1.25802	1.80255	2.98961	1.31084	6.10299
same_same	Surf6	ENSMUSG00000036160	0.174255	0.000276655	0.148715	0.000700575	47.1712	45.8748	47.8398	52.989	50.6769	55.0416	52.5047	51.4225	52.1616	48.9012	52.9025	52.0296	153.833
same_same	Abtb1	ENSMUSG00000030083	-0.386198	0.000277842	-0.0974026	0.284487	9.35361	8.99505	8.59281	7.28452	6.16456	7.14253	8.29362	8.87547	8.10039	8.2908	6.86387	8.42316	23.5778
same_same	Snhg17	ENSMUSG00000085385	0.219774	0.00027983	0.183175	0.000888467	29.2704	30.0263	27.6129	33.6028	33.2461	34.4608	34.1426	33.7061	31.0822	30.414	33.7699	32.977	97.1609
same_same	Als2cl	ENSMUSG00000044037	-0.204775	0.00028326	-0.152107	0.00249987	50.4773	53.6276	52.1844	44.0988	44.5124	46.8314	48.4386	48.5215	43.7851	49.9703	45.1475	46.9151	142.033
same_same	Man2b1	ENSMUSG00000005142	-0.198124	0.000283581	-0.315146	8.72e-08	61.887	66.5205	67.6805	55.848	56.5864	58.1711	52.3434	54.6342	50.5354	63.3497	56.8685	52.5043	172.723
same_same	Tanc1	ENSMUSG00000035168	-0.146416	0.000284721	0.0882208	0.0130767	143.207	139.466	138.161	132.414	121.633	126.172	146.994	148.776	151.729	136.68	126.74	149.166	412.586
same_same	Pcif1	ENSMUSG00000039849	-0.175269	0.000285336	-0.368105	3.49e-10	48.1389	50.8006	52.2327	43.6288	43.322	46.5737	39.435	38.9208	38.5996	48.8874	44.5082	38.9852	132.381
same_same	Dusp11	ENSMUSG00000030002	0.115166	0.00028594	-0.152348	2.93e-06	185.903	191.766	192.662	206.395	208.745	202.531	171.52	172.536	169.034	196.941	205.89	171.03	573.861
same_same	Kif5b	ENSMUSG00000006740	0.136789	0.000288384	0.0922443	0.00704757	226.059	225.433	234.902	254.136	257.168	243.324	245.388	245.163	241.017	238.157	251.543	243.856	733.556
same_same	Resf1	ENSMUSG00000032712	0.152326	0.000288384	0.00408661	0.923834	199.813	210.698	211.972	225.742	241.055	224.99	208.696	208.522	206.836	216.137	230.596	208.018	654.751
same_same	Gm36486	ENSMUSG00000117575	-0.42165	0.000288384	-0.324452	0.0015687	13.2644	13.7496	13.8547	11.7492	9.94832	8.83611	10.9076	11.7764	10.0028	13.1178	10.1779	10.8956	34.1913
same_same	C2cd3	ENSMUSG00000047248	-0.201028	0.000289244	-0.300266	2.77e-07	61.0807	56.626	62.4669	52.8324	53.3978	50.5131	51.0848	48.1417	47.0068	57.3084	52.2478	48.7444	158.301
same_same	Slc49a4	ENSMUSG00000022848	-0.395612	0.000289577	-0.164585	0.0736285	8.22473	8.95222	8.97901	6.1096	7.01484	6.73754	7.8741	8.21931	7.24126	8.01361	6.62066	7.77822	22.4125
same_same	Srp19	ENSMUSG00000014504	0.222211	0.000290977	0.243994	3.04e-05	33.9472	30.5832	31.8127	35.0519	41.1537	36.5594	38.3701	39.1281	36.82	32.4826	37.5883	38.106	108.177
same_same	Dhx15	ENSMUSG00000029169	0.119398	0.000291754	0.0559918	0.0587187	274.4	269.594	268.936	297.099	298.365	287.763	284.274	279.387	281.489	278.543	294.409	281.717	854.669
same_same	Rad9a	ENSMUSG00000024824	-0.252071	0.000291754	-0.205329	0.00103669	28.3834	27.285	26.937	23.0285	23.2127	23.1948	21.7828	25.1069	24.8535	25.7502	23.1453	23.9144	72.8099
same_same	Rsl1d1	ENSMUSG00000005846	0.129319	0.000292865	0.106128	0.00128228	179.372	167.008	176.829	189.868	197.648	184.969	188.365	187.525	187.26	177.901	190.828	187.717	556.447
same_same	Cacna1a	ENSMUSG00000034656	-0.197006	0.000292865	-0.281887	6.99e-07	177.033	185.641	170.263	165.116	145.143	154.632	146.026	156.409	136.449	173.673	154.964	146.294	474.931
same_same	Rnd1	ENSMUSG00000054855	0.499764	0.000293298	0.856791	5.1e-09	4.55585	6.29653	4.53778	7.12787	7.52501	7.17934	9.10039	8.94454	9.84934	5.98739	7.27741	9.29809	22.5629
same_same	Eif4ebp1	ENSMUSG00000031490	0.180384	0.000293503	0.0396538	0.386668	61.5242	57.2685	60.8738	68.498	65.0467	69.8421	59.8302	63.5442	61.3666	62.2134	67.7956	61.5804	191.589
same_same	Nkapd1	ENSMUSG00000059820	0.260036	0.000295312	0.15294	0.0167956	24.6339	27.1993	28.7232	31.4488	33.8838	30.9632	31.1414	28.4568	29.6094	29.1238	32.0986	29.7359	90.9582
same_same	Cyb5d1	ENSMUSG00000044795	0.419084	0.000296091	0.299152	0.00416949	5.84601	6.93904	5.79291	7.87199	8.37529	8.61521	7.74501	7.56314	7.57878	6.86798	8.2875	7.62898	22.7845
same_same	Nmral1	ENSMUSG00000063445	-0.313549	0.000296135	-0.510114	6.81e-08	19.9974	19.8748	19.5028	16.0964	16.2829	15.4632	15.1673	12.847	13.6541	18.4913	15.9475	13.8895	48.3283
same_same	Tacc1	ENSMUSG00000065954	0.135082	0.000297054	0.106152	0.00182285	93.4555	96.1614	98.9139	104.255	106.2	106.144	104.687	100.255	105.244	99.7767	105.533	103.395	308.705
same_same	Zc3hav1	ENSMUSG00000029826	0.122312	0.000297622	-0.0885954	0.00424592	258.918	255.16	263.77	284.136	286.631	275.908	242.838	241.054	247.492	267.689	282.225	243.795	793.708
same_same	Hsdl1	ENSMUSG00000034189	-0.254576	0.000297646	-0.334713	2.37e-06	29.3107	27.3278	28.6749	25.4958	22.1499	23.7839	21.4279	22.1023	24.0557	27.1662	23.8099	22.5286	73.5047
same_same	Gorasp2	ENSMUSG00000014959	0.12513	0.000298819	0.135289	4.76e-05	107.405	104.171	106.01	117.649	113.258	115.422	116.885	115.657	116.29	109.277	115.443	116.277	340.997
same_same	Etv6	ENSMUSG00000030199	0.184131	0.000299439	0.182273	0.000148618	97.6485	97.1465	96.7416	107.466	113.3	110.599	112.884	105.884	111.933	100.451	110.455	110.233	321.14
same_same	Ifrd2	ENSMUSG00000010048	-0.173366	0.00029947	-0.085352	0.0400203	41.6881	40.9917	41.3227	37.1276	36.3921	36.449	38.0796	38.2301	40.502	39.814	36.6562	38.9373	115.407
same_same	4930402H24Rik	ENSMUSG00000027309	0.18234	0.000301071	0.257631	8.05e-07	136.152	136.682	134.058	162.727	147.567	151.392	162.323	164.87	159.43	144.489	153.895	162.208	460.592
same_same	Psmc5	ENSMUSG00000020708	0.173793	0.000301071	0.188463	4.35e-05	83.86	80.0559	73.763	87.336	89.4073	91.8588	90.0035	89.2037	92.142	80.385	89.534	90.4497	260.369
same_same	Gart	ENSMUSG00000022962	-0.16921	0.000301731	-0.0915435	0.0265625	119.541	115.651	113.155	102.023	98.2928	109.347	109.979	107.438	109.693	110.276	103.221	109.037	322.533
same_same	Depdc5	ENSMUSG00000037426	-0.194555	0.000302551	-0.108744	0.0203795	44.7925	48.3163	42.0951	39.2033	40.0058	39.1734	40.5	42.4434	42.6498	43.2049	39.4609	41.8644	124.53
down_same	Arhgap22	ENSMUSG00000063506	-0.540262	0.000304501	-0.875489	1.07e-07	5.88633	5.31136	5.31017	3.72059	3.78376	3.8658	2.83984	3.14268	3.03765	4.78071	3.79005	3.00672	11.5775
same_same	Fads2	ENSMUSG00000024665	0.115034	0.000305309	0.0656292	0.0220218	246.218	248.135	248.419	268.392	268.605	267.403	257.102	251.863	268.203	254.982	268.133	259.056	782.171
same_same	Exoc6	ENSMUSG00000053799	0.164172	0.000305874	0.153353	0.000277428	47.1712	46.4316	47.1157	51.8141	54.2906	51.6913	51.0848	51.3534	53.9719	48.4538	52.5987	52.1367	153.189
same_same	Pafah1b2	ENSMUSG00000003131	0.133447	0.000306651	0.126175	0.00029498	188.685	185.17	198.986	213.601	210.998	203.562	211.019	202.685	211.101	199.252	209.387	208.269	616.908
same_same	Arpc3	ENSMUSG00000029465	0.13629	0.000306651	0.251479	5.53e-09	176.025	171.12	165.484	185.05	186.34	192.222	201.306	204.378	204.872	173.885	187.871	203.519	565.274
same_same	Maco1	ENSMUSG00000028826	0.1903	0.000307874	0.0213808	0.673024	45.1554	46.6458	48.226	55.6914	54.8433	49.2613	47.3091	46.3804	48.1728	50.1877	53.2653	47.2874	150.74
same_same	Tox4	ENSMUSG00000016831	0.163046	0.000308891	0.0575732	0.153987	61.8467	64.2075	65.5564	71.4353	72.6567	70.3207	65.9617	65.789	67.4112	67.0664	71.4709	66.3873	204.925
same_same	Plaa	ENSMUSG00000028577	0.126957	0.000309191	0.05847	0.0627524	118.896	116.636	114.362	125.678	131.454	125.289	119.983	122.633	121.935	118.892	127.473	121.517	367.882
same_same	Pltp	ENSMUSG00000017754	-0.19878	0.000309781	-0.395112	1.36e-09	59.9115	65.9637	63.4806	52.7149	56.1612	55.9989	46.1474	48.0035	49.6763	60.7197	54.9583	47.9424	163.62
same_same	Cpeb2	ENSMUSG00000039782	0.247379	0.000310013	0.110952	0.0691794	24.4726	26.4283	25.0543	30.2739	32.1407	27.9442	25.6876	28.664	27.707	27.2522	30.1196	27.3529	84.7246
same_same	Gch1	ENSMUSG00000037580	0.149535	0.00031144	0.221554	2.76e-07	48.4614	48.6161	49.1914	54.0465	53.7804	54.3421	57.3454	55.2904	57.7767	50.618	54.0563	56.8041	161.478
same_same	Hcn2	ENSMUSG00000020331	-0.29508	0.000313106	-0.273994	0.000281706	33.3827	33.4102	37.316	29.7256	26.8265	28.0178	29.786	28.1805	27.9218	33.4839	28.19	28.6294	90.3033
same_same	Hlcs	ENSMUSG00000040820	-0.314401	0.000313106	-0.140186	0.0604404	16.2479	18.7183	19.1166	14.0208	15.05	14.3219	16.9422	15.8515	16.1087	17.2852	14.4642	16.3008	48.0502
same_same	Tmem131l	ENSMUSG00000033767	-0.167221	0.00031478	-0.251221	2.77e-07	49.1871	51.6145	50.8328	44.7254	45.9153	44.4015	43.7271	40.8548	42.6805	49.0575	45.0141	42.4208	136.492
same_same	Reep3	ENSMUSG00000019873	0.140197	0.000315655	-0.0851291	0.0158057	183.282	190.095	190.442	205.102	216.525	199.843	173.521	174.47	183.271	195.213	207.157	177.087	579.458
same_same	Mcm5	ENSMUSG00000005410	-0.127884	0.000317528	-0.39941	4.93e-14	203.401	195.492	201.207	175.729	185.617	187.841	154.739	147.982	152.189	190.81	183.062	151.637	525.509
same_same	Ube2d3	ENSMUSG00000078578	0.131164	0.000318946	0.0290892	0.390069	236.017	238.112	247.357	270.467	268.562	251.093	242.645	248.41	244.976	251.979	263.374	245.343	760.696
same_same	Rmnd5a	ENSMUSG00000002222	-0.183126	0.000320098	-0.252783	1.33e-06	97.8904	104.3	106.541	93.5239	88.8121	89.2448	90.3262	81.2606	87.0485	101.455	90.5269	86.2118	278.194
same_same	Stxbp3	ENSMUSG00000027882	0.20646	0.000320723	0.116257	0.0224926	30.7621	32.3393	32.2472	38.1458	37.4125	34.4977	35.3689	33.0499	34.7642	34.2441	36.6853	34.3943	105.324
down_same	Amigo1	ENSMUSG00000050947	-0.791725	0.000321381	-0.552514	0.003298	4.15268	4.19769	3.3792	2.42817	1.99817	2.3563	2.74303	2.45198	2.82286	3.33502	2.26088	2.67262	8.26852
same_same	Mxi1	ENSMUSG00000025025	-0.202491	0.0003226	-0.323748	9.77e-08	51.0417	49.4299	50.9776	44.4513	43.9172	43.2601	42.1458	37.9539	40.7781	48.2863	43.8762	40.2926	132.455
down_same	Gng7	ENSMUSG00000048240	-0.504121	0.000323574	-0.269023	0.0230141	6.65235	7.02471	5.31017	4.81719	4.37896	4.27079	5.29243	5.0421	5.49231	5.71735	4.48898	5.27561	15.4819
same_same	Pik3r1	ENSMUSG00000041417	-0.169472	0.00032398	-0.252051	3.56e-07	65.6366	67.163	66.3288	61.7618	56.0337	59.0915	54.4733	57.5352	55.2606	65.0845	58.9623	55.7564	179.803
same_same	Phf19	ENSMUSG00000026873	-0.215325	0.000325368	-0.267235	6.66e-06	45.9617	46.9028	45.5226	41.8664	37.1574	40.0571	37.8215	38.3683	38.8144	44.7639	39.6936	38.3347	122.792
down_same	Fut10	ENSMUSG00000046152	-0.517077	0.000326927	-0.318959	0.00954551	6.69267	6.5107	6.5653	4.97384	4.37896	4.45487	5.61513	5.00756	5.21616	6.01661	4.60256	5.27962	15.8988
same_same	Myo19	ENSMUSG00000020527	0.178472	0.000327979	0.353449	6.92e-10	32.3748	32.7677	30.9921	36.3443	36.3921	36.1913	39.6287	41.4764	41.852	33.368	36.3092	40.9857	110.663
same_same	Cul3	ENSMUSG00000004364	0.142202	0.000329397	0.0131071	0.73579	139.175	140.708	133.72	149.489	160.619	146.864	141.346	135.584	140.56	141.306	152.324	139.164	432.793
same_same	Abl1	ENSMUSG00000026842	-0.146683	0.000331226	-0.197972	1.85e-06	64.4674	67.0345	66.9081	60.9785	59.6049	58.5761	57.5713	57.6733	57.6233	64.9737	59.7198	57.6226	182.316
same_same	Ado	ENSMUSG00000057134	-0.166757	0.000331985	-0.0334674	0.42747	93.3345	90.9357	94.4727	85.1036	82.0524	81.1082	87.8414	88.0985	96.1308	90.1706	82.7547	90.6902	263.616
same_same	Akt2	ENSMUSG00000004056	0.182345	0.000332536	0.0988484	0.0286162	50.4369	48.9588	49.6259	54.8689	56.4163	57.8029	53.4729	50.8699	55.1379	51.1512	56.3627	53.1602	160.674
same_same	Slfn4	ENSMUSG00000000204	0.230427	0.000333482	0.479811	3.47e-10	77.5302	85.3245	79.4111	91.6832	100.163	92.5951	112.722	121.114	104.323	85.4729	94.8139	112.72	293.007
same_same	Slc36a4	ENSMUSG00000043885	-0.148707	0.000334114	-0.327754	1.78e-10	120.226	120.362	122.182	112.479	108.836	105.923	96.5545	92.7262	99.5367	118.341	109.08	96.2725	323.693
same_same	Cep350	ENSMUSG00000033671	-0.150976	0.000334674	-0.0341999	0.367	84.7066	87.6803	86.604	79.699	78.2686	75.3279	86.7119	84.9213	81.3108	84.6611	77.7651	84.3147	246.741
same_same	Rp2	ENSMUSG00000060090	-0.215975	0.000341449	-0.118918	0.0235608	47.01	51.1433	53.343	45.0779	44.98	40.278	48.6	45.3443	45.2272	49.8547	43.4453	46.3905	139.691
same_same	Rhbdd2	ENSMUSG00000039917	-0.195905	0.000342381	-0.261372	2.23e-06	31.2459	33.8385	33.9851	29.3731	28.2294	28.7174	27.9789	27.5243	27.032	32.3989	28.7733	27.5117	88.6839
same_same	Ncaph	ENSMUSG00000034906	-0.158218	0.000342648	-0.341308	2.82e-10	76.4416	77.9571	78.6387	69.5555	70.9137	68.3694	60.7984	60.2634	62.7167	75.3838	69.6129	61.2595	206.256
same_same	Bag5	ENSMUSG00000049792	0.211074	0.000348001	0.0806611	0.125854	31.2056	34.0099	31.9093	38.2633	36.0945	37.9585	35.5948	32.4628	34.5494	34.7275	37.4388	34.2023	106.369
same_same	Tlr7	ENSMUSG00000044583	-0.151215	0.000348352	-0.0893028	0.0182716	175.017	184.184	193.193	165.938	165.508	165.567	171.358	168.047	179.252	181.105	165.671	172.886	519.662
same_same	3300005D01Rik	ENSMUSG00000096965	0.195264	0.000348352	0.173848	0.000543413	39.7932	38.6359	37.2677	44.8037	43.1944	44.5856	43.2107	44.032	43.4782	40.2358	44.1946	43.5737	128.004
same_same	Nol12	ENSMUSG00000033099	0.210444	0.000348352	0.0143745	0.805994	25.4402	25.3146	26.2129	28.9814	29.7599	30.2269	25.0745	26.2465	26.357	26.8363	29.6561	25.8927	82.3851
same_same	Ppp1r12a	ENSMUSG00000019907	0.141076	0.000354424	-0.0347408	0.340186	120.871	125.845	123.003	135.704	143.103	129.191	120.37	121.218	119.327	128.184	135.999	120.305	384.488
down_same	Gm38335	ENSMUSG00000104000	-0.690872	0.000354424	-0.202746	0.199878	5.24125	4.15486	4.34468	2.66316	2.97599	2.90855	3.87251	3.6607	4.4184	3.7209	2.84924	3.98387	10.554
same_same	Csde1	ENSMUSG00000068823	0.127046	0.000358253	0.0328847	0.318827	690.837	718.79	717.452	771.376	798.842	752.69	734.227	717.463	724.341	735.873	774.302	725.344	2235.52
same_same	Snrk	ENSMUSG00000038145	-0.251603	0.000358253	-0.0553201	0.372974	25.3999	25.1433	24.5716	21.1878	21.0445	20.9121	25.2358	23.0693	23.9943	23.6342	21.0481	24.0998	68.7822
same_same	Dcaf5	ENSMUSG00000049106	0.195295	0.000359246	0.0834642	0.086431	40.1963	40.7347	35.8678	43.7855	45.5327	44.8065	39.8545	41.5455	42.6498	40.1293	44.7082	41.3499	126.187
same_same	Btd	ENSMUSG00000021900	0.286764	0.00035938	0.180827	0.0118708	15.0384	13.3212	14.2409	17.2714	16.8356	17.8563	15.49	16.2659	16.569	14.9445	17.3211	16.1083	48.3739
same_same	Ndfip1	ENSMUSG00000024425	0.130996	0.000360006	0.206517	1.2e-07	71.6035	72.2602	75.8388	79.1898	80.9895	80.1877	85.9374	83.4363	83.8575	75.763	80.1224	84.4104	240.296
same_same	4933404O12Rik	ENSMUSG00000097908	-0.330223	0.000362176	-0.225108	0.00567867	27.9802	31.8682	27.9991	25.1434	20.5344	24.0416	25.7844	23.4147	25.8967	28.3369	23.2398	25.0319	76.6086
same_same	Gask1b	ENSMUSG00000027955	-0.216701	0.00036389	-0.529695	2.52e-11	51.2433	51.229	51.7017	45.822	45.9153	41.1247	36.0789	35.6746	35.0403	49.5842	44.2874	35.5979	129.469
same_same	Prpf40a	ENSMUSG00000061136	0.141812	0.000364351	-0.0182282	0.634451	185.742	188.682	190.49	209.567	219.798	194.174	186.913	184.347	186.432	196.246	207.846	185.897	589.99
same_same	Hectd4	ENSMUSG00000042744	-0.167367	0.000364448	0.0532792	0.195444	87.2466	93.5057	88.0039	81.3439	75.7603	81.9918	93.9406	95.2473	89.8407	87.6178	79.6986	93.0095	260.326
same_same	Fbxo11	ENSMUSG00000005371	0.167417	0.000364448	0.072103	0.0847958	62.4112	65.1927	64.4944	71.4353	74.7825	69.6212	65.1227	67.6539	69.0374	67.0408	71.9463	67.2713	206.258
same_same	Synj2	ENSMUSG00000023805	0.302621	0.000367029	0.251541	0.0011908	22.4164	23.3871	22.4958	29.6081	26.8265	27.7601	27.1398	27.3862	26.8172	25.1637	28.0649	27.1144	80.3429
same_same	Csf1r	ENSMUSG00000024621	-0.154979	0.000369187	0.194936	8.22e-06	458.569	460.846	453.054	412.986	403.29	416.365	514.269	511.566	545.15	442.295	410.88	523.662	1376.84
same_same	Kansl1	ENSMUSG00000018412	-0.178703	0.000371052	-0.192106	6.15e-05	78.3768	78.8994	76.6595	71.9445	70.1484	64.8718	66.3489	71.9707	66.7055	75.8345	68.9882	68.3417	213.164
same_same	Mapk1ip1l	ENSMUSG00000021840	0.142375	0.000371232	0.151336	7.77e-05	101.68	108.369	100.169	117.375	109.091	115.864	114.078	114.518	116.044	108.638	114.11	114.88	337.627
same_same	Cant1	ENSMUSG00000025575	-0.198949	0.000371232	-0.151155	0.00255077	55.7185	52.5568	61.1152	48.7593	48.1686	50.2186	49.5681	50.2828	52.2844	54.1438	49.0488	50.7118	153.904
same_same	Terf2	ENSMUSG00000031921	-0.234933	0.000371232	-0.236736	0.000128138	31.9716	34.6524	34.8057	27.3365	27.3366	31.1841	28.7856	30.1835	27.0934	32.2649	28.6191	28.6875	89.5715
same_same	Phka1	ENSMUSG00000034055	-0.270489	0.000372417	-0.107197	0.101478	26.8513	29.8978	29.2542	23.2243	23.5954	24.3361	27.2044	25.5213	26.9399	27.4588	23.7186	26.5552	77.7326
same_same	Snrnp70	ENSMUSG00000063511	0.119518	0.000372717	0.0891647	0.00380975	263.07	243.809	249.336	273.444	272.729	275.503	268.01	266.609	269.952	255.53	273.892	268.19	797.612
same_same	Rmnd1	ENSMUSG00000019763	-0.3767	0.000373678	-0.441884	1.73e-05	11.4098	12.6787	12.0203	8.81192	9.35312	9.60927	9.55218	8.73733	8.28449	11.1703	9.25811	8.858	29.2864
same_same	Fxyd5	ENSMUSG00000009687	0.21066	0.00037516	0.308433	7.59e-07	377.733	357.617	315.569	390.975	393.001	432.601	430.074	435.831	436.194	354.72	405.526	434.033	1194.28
same_same	Tmem43	ENSMUSG00000030095	0.137003	0.000375454	0.220378	1.05e-07	134.257	125.331	135.12	139.973	146.674	147.269	156.901	150.918	151.882	133.474	144.638	153.234	431.346
same_same	Snhg12	ENSMUSG00000086290	0.386264	0.000375891	0.178779	0.0675257	11.3695	9.08072	9.84794	12.3367	12.5842	14.69	11.4884	11.5692	11.3528	10.4218	13.2036	11.4702	35.0956
same_same	Arih2	ENSMUSG00000064145	0.191411	0.000376134	0.105392	0.0277139	40.3979	40.9917	41.1779	46.9969	48.4662	44.6224	43.5012	43.8248	44.4601	43.0555	46.6952	43.9287	133.679
same_same	Smox	ENSMUSG00000027333	0.220276	0.000379023	0.444456	5.66e-10	36.0033	36.9654	35.4333	43.1588	40.6861	42.4133	46.3733	49.4195	51.7321	38.5192	42.0861	49.1749	129.78
same_same	Insr	ENSMUSG00000005534	-0.157732	0.00037949	-0.0314984	0.432834	60.7985	61.0378	59.3773	54.9864	53.0577	54.4157	58.5071	60.4016	58.5438	58.4672	54.1533	59.1508	171.771
same_same	Bola1	ENSMUSG00000015943	-0.362849	0.00037949	-0.284138	0.00176804	11.8533	11.8649	12.3582	8.81192	9.43815	9.75654	10.1653	9.4971	9.91071	11.0117	9.33554	9.85771	30.2049
same_same	Gm4430	ENSMUSG00000103009	-0.486235	0.000382714	-0.248631	0.031479	6.41045	6.42504	6.1791	4.62136	4.67656	4.30761	5.03426	5.59466	5.40026	5.74183	4.53518	5.34306	15.6201
same_same	Emg1	ENSMUSG00000004268	0.146511	0.000383084	0.320488	1.77e-10	107.405	102.972	103.21	112.949	113.13	120.981	130.794	132.303	128.747	106.377	115.687	130.615	352.679
same_same	Cwf19l2	ENSMUSG00000025898	0.228915	0.000384056	0.145017	0.0118597	28.1012	27.9275	27.1301	33.0937	33.3311	31.2209	31.2059	29.2856	31.4504	29.3838	32.5486	30.6473	92.5796
same_same	Jmy	ENSMUSG00000021690	-0.215981	0.000384773	-0.245207	2.89e-05	33.0602	34.8237	34.6609	29.4514	29.4198	29.3433	29.9474	27.697	28.7503	32.9787	29.4048	28.7982	91.1817
same_same	Gm12606	ENSMUSG00000087659	0.292999	0.000384773	0.534054	3.92e-09	15.2803	14.4349	15.496	17.0364	18.3236	19.9181	20.7179	22.4477	22.2761	15.6558	18.426	21.8139	55.8957
same_same	Tln2	ENSMUSG00000052698	-0.199863	0.000385906	-0.203037	0.000125042	51.3239	51.486	48.2742	45.1171	44.2998	42.3765	43.6625	43.6176	44.1226	48.2924	43.9311	43.8009	136.024
same_same	AB124611	ENSMUSG00000057191	-0.19852	0.00038986	-0.0825465	0.089103	37.4548	37.051	37.2194	32.1929	31.3755	33.6877	35.1107	35.0529	35.3472	35.4878	32.4187	35.1703	103.077
same_same	Iqgap3	ENSMUSG00000028068	-0.147706	0.000389956	-0.490519	1.9e-14	165.583	179.815	173.304	155.012	155.134	157.872	123.307	123.842	121.966	169.377	156.006	123.038	448.421
down_up	Deptor	ENSMUSG00000022419	-0.54182	0.000392268	0.0221289	0.872484	5.48315	6.85337	7.28941	4.77802	4.76159	3.90262	6.74462	6.42349	6.62759	6.30693	4.48074	6.59857	17.3862
same_same	Tnfaip8l2	ENSMUSG00000013707	0.269681	0.00039275	0.39612	3.87e-07	22.1745	20.6886	21.8682	25.1434	25.1684	27.6129	27.1398	28.7676	29.2719	22.5667	25.9749	28.3931	76.9347
same_same	Vamp3	ENSMUSG00000028955	0.156881	0.000397783	-0.0379219	0.354703	61.9677	61.5947	62.2255	69.438	68.6604	68.9953	62.186	60.2979	58.5131	64.4194	69.0312	60.3323	193.783
same_same	Tfg	ENSMUSG00000022757	0.154102	0.000398823	0.16073	0.000100576	73.3372	74.1021	75.163	84.4378	82.35	80.8504	83.2912	80.1901	85.1155	77.901	82.5461	82.8656	243.313
same_down	Chaf1b	ENSMUSG00000022945	-0.179994	0.000398871	-0.79753	3.53e-17	55.3153	53.3278	52.9086	48.5243	46.8506	47.31	31.335	29.9072	31.6959	51.5869	47.5617	30.9794	130.128
same_same	H2az2	ENSMUSG00000041126	-0.308793	0.000398871	-0.60352	3.79e-09	20.6828	21.9308	19.889	16.0964	15.3901	18.8504	14.0378	13.7449	13.4086	19.3054	16.779	13.7304	49.8148
same_same	Chrnb2	ENSMUSG00000027950	-0.350021	0.000400802	-0.375084	6.24e-05	10.0793	10.8369	10.6203	8.02864	8.20524	8.46794	8.55179	8.15024	7.60946	9.82862	8.23394	8.10383	26.1664
same_same	Upf2	ENSMUSG00000043241	0.178069	0.000403448	0.065306	0.148088	57.6537	58.6392	56.3843	67.0881	66.2371	62.2946	62.3796	57.915	60.3848	60.7039	65.2066	60.2265	186.137
same_same	Herc4	ENSMUSG00000020064	0.16424	0.000404199	0.268863	6.64e-08	62.129	62.2372	60.0531	66.9315	69.1281	70.6889	74.2876	74.9062	73.2104	63.0739	68.9161	74.1347	206.125
same_same	Tbc1d17	ENSMUSG00000038520	-0.313315	0.000408339	-0.448454	9.96e-07	14.9577	15.4629	16.2201	12.3367	12.2866	12.8124	11.0689	11.7419	11.3221	14.6733	12.4786	11.3776	38.5294
same_same	Eif4ebp2	ENSMUSG00000020091	-0.155306	0.000409851	-0.214777	1.92e-06	141.877	147.176	142.071	128.537	122.228	136.003	126.792	122.703	122.028	139.261	128.922	123.841	392.025
same_same	Ppme1	ENSMUSG00000030718	0.185302	0.000412317	0.266649	6.89e-07	47.2922	46.4744	47.8398	55.1039	53.993	51.949	57.1517	55.8775	57.2244	49.806	53.682	56.7512	160.239
same_same	Cep131	ENSMUSG00000039781	-0.409119	0.000414587	-0.370472	0.000454148	12.1355	12.1219	12.3099	10.1435	9.09804	8.32067	10.6817	8.91001	8.68338	11.5251	9.1874	9.42502	30.1375
same_same	Sh3kbp1	ENSMUSG00000040990	0.161266	0.000415728	0.560423	2.28e-15	89.0609	87.1663	84.142	97.0878	100.971	93.5892	128.245	126.709	129.299	89.4654	97.2161	128.084	314.766
same_same	Nup155	ENSMUSG00000022142	-0.144001	0.000418265	-0.252119	2.94e-08	132.16	136.039	136.568	123.563	122.823	119.877	114.013	114.863	110.951	132.057	122.088	113.276	367.42
same_same	Cped1	ENSMUSG00000062980	-0.431401	0.000420008	-0.133835	0.19597	7.74092	7.15321	7.72388	5.24799	5.52684	5.96438	7.26095	6.18175	7.11853	6.70836	5.57974	6.85374	19.1418
same_same	Zcchc2	ENSMUSG00000038866	-0.170708	0.000421177	-0.0661479	0.118262	60.234	61.0378	59.5221	55.5739	54.7158	50.5499	57.6358	57.0517	58.0221	58.7113	53.6132	57.5699	169.894
same_same	Ginm1	ENSMUSG00000040006	0.190711	0.000422255	0.300085	1.26e-07	32.9795	31.6112	33.6954	36.266	38.7304	37.1853	39.2091	40.026	41.6373	33.8575	37.3939	40.2908	111.542
up_same	Gm44206	ENSMUSG00000107429	0.547483	0.000423269	0.583784	6.39e-05	3.46729	3.68369	3.71712	5.01301	5.44182	5.41212	4.90518	5.24931	6.0753	4.13794	5.28898	5.40993	14.8368
same_same	Slc7a5	ENSMUSG00000040010	0.145127	0.000423771	0.0331565	0.386436	172.437	179.216	173.932	193.627	192.972	194.579	176.425	179.996	181.369	182.258	193.726	179.263	555.248
same_same	Ttll12	ENSMUSG00000016757	-0.184163	0.000428539	0.0301667	0.524688	47.5744	46.9456	45.2812	41.514	40.1759	41.4193	46.8896	48.5561	47.4978	44.5803	41.0364	47.6478	133.264
same_same	Dele1	ENSMUSG00000024442	-0.213475	0.000428539	-0.300094	1.38e-06	36.3662	37.7792	36.1574	31.5271	30.3976	33.0986	30.2701	30.5979	28.8116	35.1546	31.6745	29.8932	96.7222
same_same	Ptp4a3	ENSMUSG00000059895	-0.179017	0.000428713	0.043429	0.333731	49.8322	48.7874	47.888	43.8638	43.0669	42.5974	51.6334	49.6267	49.8297	46.8464	43.176	50.3633	140.386
same_same	A430033K04Rik	ENSMUSG00000056014	-0.398705	0.00042929	-0.296684	0.00289278	8.30536	7.92421	7.14459	6.22709	5.90947	5.66984	6.35736	6.5271	6.22871	7.09863	5.93547	6.37106	19.4052
same_same	Pdpr	ENSMUSG00000033624	-0.192703	0.000431447	-0.298138	2.76e-07	36.5678	36.537	33.8885	31.5663	30.4402	31.6996	28.9147	28.664	29.548	33.9973	31.2353	29.0422	94.2748
up_same	Lrrc32	ENSMUSG00000090958	1.4456	0.000434469	0.987915	0.0112995	0.564442	0.385502	0.386194	0.900774	1.70057	1.14133	0.645418	1.20872	0.859133	0.55749	1.24756	0.904424	2.70947
same_same	Atp6v0c	ENSMUSG00000024121	-0.216126	0.000438566	-0.202162	0.000362388	36.6484	38.9357	37.9918	34.3078	30.2701	32.9882	31.4964	33.0154	34.1198	37.0784	32.522	32.8772	102.478
same_same	Smg7	ENSMUSG00000042772	0.142289	0.000438979	-0.0980682	0.00815123	147.118	152.273	147.333	173.301	164.36	155.552	140.959	137.311	139.087	157.636	164.404	139.119	461.159
same_same	Lilr4b	ENSMUSG00000112023	0.187385	0.000445176	0.149415	0.00254039	489.21	499.525	494.087	525.896	596.772	565.916	544.733	575.179	524.807	506.503	562.861	548.24	1617.6
down_same	2010008C14Rik	ENSMUSG00000107761	-0.526997	0.000446121	-0.859494	1.76e-07	4.51554	4.84019	4.53778	3.28979	2.97599	3.35036	2.42032	2.69372	2.54671	4.22259	3.20538	2.55358	9.98155
same_same	Uhrf1bp1	ENSMUSG00000039512	-0.229515	0.000447654	-0.258985	3.73e-05	26.5288	27.4563	27.468	22.8718	23.0427	23.4893	23.0091	22.6204	22.3988	25.9321	23.1346	22.6761	71.7428
same_same	Wdr62	ENSMUSG00000037020	-0.239725	0.000451596	-0.563152	1e-10	38.0595	39.7067	41.371	34.0728	30.6952	35.7126	28.1402	26.1429	26.2035	38.3835	33.4935	26.8289	98.7059
same_same	9430015G10Rik	ENSMUSG00000059939	-0.272367	0.000453249	-0.303073	4.54e-05	24.271	25.6573	26.4543	22.441	20.1517	20.5071	19.7498	21.1354	20.926	24.8509	21.0333	20.6037	66.4879
same_same	Zdhhc5	ENSMUSG00000034075	0.126394	0.000453394	0.195081	3.2e-07	127.685	130.343	126.961	141.735	140.467	138.138	144.186	144.321	152.159	133.013	140.113	146.889	420.015
same_same	Mgat2	ENSMUSG00000043998	0.138891	0.000453973	0.0461912	0.197762	118.049	121.176	127.396	132.805	141.147	129.633	124.695	125.396	128.041	127.126	134.529	126.044	387.699
same_same	Tmem260	ENSMUSG00000036339	-0.247102	0.000455674	-0.330852	3.27e-06	25.7224	27.6277	27.9991	22.3627	23.5103	22.6057	20.7825	22.4477	21.3863	25.9965	22.8263	21.5388	70.3615
same_same	Usp34	ENSMUSG00000056342	0.142349	0.00045658	0.11405	0.00237285	214.69	218.922	223.751	246.891	249.473	229.224	238.643	235.079	237.519	229.855	241.862	237.081	708.798
same_same	Hnrnpd	ENSMUSG00000000568	0.13103	0.000456768	-0.0539593	0.110879	158.084	155.829	152.547	169.424	177.157	164.646	148.027	151.159	150.318	159.266	170.409	149.834	479.51
same_same	Uap1	ENSMUSG00000026670	0.180581	0.000456768	0.229331	6.69e-06	54.6299	51.9143	49.7225	58.7462	61.2204	57.6188	63.1864	60.1598	60.17	53.461	59.1951	61.1721	173.828
same_same	Rassf1	ENSMUSG00000010067	0.185533	0.000460544	0.11893	0.0120609	33.4634	35.5519	33.1644	37.9109	39.7933	38.6212	36.692	36.5379	37.7405	35.5424	38.7751	36.9901	111.308
same_same	Dpy19l1	ENSMUSG00000043067	-0.142048	0.000461231	-0.211388	6.03e-07	73.1356	76.6293	76.6112	67.9106	68.0227	69.0321	64.5095	65.1674	65.693	73.717	68.3218	65.1233	207.162
same_down	Mcm7	ENSMUSG00000029730	-0.116367	0.000469015	-0.629607	1.7e-19	144.82	143.749	145.643	134.137	132.092	134.235	93.1983	92.6226	94.7501	141.177	133.488	93.5237	368.188
same_same	Snx9	ENSMUSG00000002365	0.149699	0.000469428	0.208599	1.99e-06	151.391	147.176	145.064	161.748	161.341	169.101	172.004	165.768	174.956	151.329	164.063	170.909	486.302
same_same	Trio	ENSMUSG00000022263	0.176669	0.000469735	0.225846	8.46e-06	184.452	192.623	190.007	224.763	212.443	203.746	214.472	233.145	215.642	202.464	213.651	221.087	637.202
same_same	Rhbdf1	ENSMUSG00000020282	0.398217	0.000470992	0.571011	6.24e-07	7.86187	8.52388	7.6756	9.98685	10.2459	11.4501	10.488	12.5362	12.7643	8.72878	10.561	11.9295	31.2192
same_same	Cpsf1	ENSMUSG00000034022	-0.124852	0.000471865	-0.0671447	0.0342667	111.921	115.651	113.541	105.508	102.034	105.15	110.915	108.336	106.348	111.567	104.231	108.533	324.33
same_same	Tspan5	ENSMUSG00000028152	0.200462	0.000471865	0.13322	0.00965003	43.2201	41.8056	42.7227	52.4407	48.7638	45.7269	46.9541	47.451	45.7795	45.6563	48.9771	46.7282	141.362
same_same	Tsc22d4	ENSMUSG00000029723	0.165086	0.000472928	0.260865	1.77e-07	70.2327	70.1614	75.163	84.0462	77.7159	79.525	83.3557	86.2682	88.2759	76.4568	80.429	85.9666	242.852
same_same	Tiparp	ENSMUSG00000034640	-0.158642	0.000472928	-0.308298	4.27e-09	61.121	61.5518	64.7357	56.1613	56.884	54.7471	50.4071	50.3519	50.4127	60.8163	55.9308	50.3906	167.138
same_same	Card6	ENSMUSG00000041849	0.356956	0.000472928	0.469031	3.21e-06	10.4019	11.6507	10.1376	13.4333	13.6471	14.1746	13.6506	15.6788	15.311	11.7405	13.7516	14.8801	40.3723
same_same	Psmc2	ENSMUSG00000028932	0.148688	0.000475349	0.221755	5.88e-07	108.978	98.5172	100.217	113.38	109.644	118.183	118.854	122.703	117.732	104.038	113.736	119.763	337.537
same_same	Knstrn	ENSMUSG00000027331	-0.133921	0.000488295	-0.182538	2.79e-06	77.4092	74.1877	78.7835	70.3779	69.3832	70.063	68.8015	66.756	67.3192	74.4497	69.9414	67.6256	212.017
same_same	Map7d1	ENSMUSG00000028849	0.128339	0.00049017	0.0608427	0.0661761	135.547	134.54	135.699	146.435	150.118	147.048	141.411	140.626	141.205	138.891	147.867	141.081	427.838
same_same	Nfxl1	ENSMUSG00000072889	0.206058	0.00049017	0.0399711	0.471694	27.1335	29.9835	28.1439	32.2712	31.6306	34.2768	29.3342	29.7346	28.5968	30.1329	32.7262	29.2219	92.0809
same_same	Riok1	ENSMUSG00000021428	0.209394	0.000495354	0.094966	0.0767783	29.9154	27.5848	29.0611	32.6237	36.3921	31.3682	30.3992	30.7706	31.297	29.7565	33.4613	30.8223	94.0401
same_same	Gmeb2	ENSMUSG00000038705	0.234225	0.000496274	0.107389	0.0744153	28.9478	29.2125	29.9783	32.8587	35.0742	35.639	32.4	31.5304	30.9595	30.6832	34.524	31.6299	96.8371
same_same	Fam207a	ENSMUSG00000032977	0.18232	0.000499719	0.00498137	0.925724	36.2452	33.8814	35.2885	40.7307	40.3885	38.6212	35.4657	34.2586	36.0222	36.6335	39.9134	35.2488	111.796
same_same	Msantd2	ENSMUSG00000042138	0.216304	0.000499719	0.041845	0.480371	22.0939	22.7446	21.5786	26.5533	26.1887	24.557	21.7828	22.7585	23.8409	23.6255	25.7663	22.7941	72.1859
same_same	Man2a2	ENSMUSG00000038886	-0.15078	0.00050045	0.008871	0.832904	92.4072	88.9653	89.2591	83.7329	78.4387	81.5868	91.4557	91.5866	89.4418	87.3191	81.2528	90.828	259.4
same_same	Luc7l2	ENSMUSG00000029823	0.123715	0.000503041	-0.0281071	0.398539	279.641	284.8	286.749	309.749	319.749	297.998	280.144	282.288	272.314	293.766	309.165	278.249	881.18
down_same	Gm19605	ENSMUSG00000113585	-0.599881	0.000505963	-0.130036	0.370492	3.99141	4.32619	4.6826	2.54567	2.80594	3.16627	4.16294	3.72977	3.92746	3.85149	2.83929	3.94006	10.6308
same_same	Atp9b	ENSMUSG00000024566	0.135564	0.000507321	0.0532583	0.129785	112.284	118.563	115.81	128.967	128.648	123.227	120.015	119.733	119.849	121.114	126.947	119.866	367.927
same_same	Synj1	ENSMUSG00000022973	-0.140867	0.000507321	-0.0504906	0.15992	94.1812	92.135	92.1072	84.1637	81.5422	86.7044	91.488	88.8583	88.5827	89.4686	84.1367	89.643	263.248
same_same	Brix1	ENSMUSG00000022247	0.164598	0.000507839	0.11556	0.00674291	52.2512	51.229	47.7915	53.5373	58.4995	57.8765	55.635	53.2874	55.1993	50.8526	56.6378	54.7072	162.198
same_same	Pex26	ENSMUSG00000067825	-0.362847	0.000513412	-0.0869937	0.337767	11.6114	10.5371	11.1513	9.75186	8.37529	7.80523	10.1331	10.1533	11.046	10.4801	8.64413	10.4441	29.5683
same_same	Xpr1	ENSMUSG00000026469	0.143167	0.000517601	-0.122618	0.00150422	107.768	116.721	111.513	122.349	125.885	122.822	101.46	104.883	102.267	116.861	123.685	102.87	343.416
same_same	Golt1b	ENSMUSG00000030245	-0.130106	0.000517601	-0.280004	6.52e-10	117.243	112.438	120.975	105.391	104.542	110.12	96.6836	96.7323	95.241	112.935	106.684	96.2189	315.838
same_same	Inip	ENSMUSG00000038544	-0.19279	0.000519206	-0.305	2.53e-07	48.7839	49.8583	50.9776	44.0596	42.3441	44.291	41.0486	38.6791	41.177	48.2985	43.5649	40.3016	132.165
same_same	Calu	ENSMUSG00000029767	0.113851	0.00051935	0.198324	5.58e-08	561.862	569.729	570.746	614.172	630.613	597.395	657.1	637.1	658.924	584.882	614.06	651.041	1849.98
same_same	Etv3	ENSMUSG00000003382	0.138703	0.00051935	0.0318836	0.391303	124.621	124.346	120.444	138.602	137.703	130.701	126.405	126.847	124.605	127.797	135.669	125.952	389.418
same_same	Lemd2	ENSMUSG00000044857	-0.205174	0.00051935	-0.0918245	0.0744153	35.963	38.85	37.5091	33.0545	31.8856	32.3991	35.0139	35.0529	35.2551	36.4712	32.4464	35.1073	104.025
down_up	Frat2	ENSMUSG00000047604	-1.07182	0.00051935	-0.384217	0.112409	1.53206	2.91268	1.59305	1.0966	0.765255	0.994063	1.67809	1.41593	1.53417	1.86744	0.951971	1.54273	4.36214
same_same	Gm49336	ENSMUSG00000114797	0.170431	0.000520625	0.0390272	0.392107	79.667	83.9538	85.5902	98.6152	96.7198	85.1949	83.5493	84.5415	87.6008	89.3864	93.51	85.2305	268.127
same_same	Mcrip1	ENSMUSG00000061111	-0.254893	0.000521446	-0.193451	0.00313561	20.9247	21.1598	20.8062	17.4672	17.856	17.4145	19.4271	18.5107	17.1213	19.8111	17.5792	18.353	55.7433
same_same	Sub1	ENSMUSG00000022205	0.146654	0.000524307	0.129624	0.000936696	89.8269	84.5106	88.3901	95.4429	97.9102	97.5286	93.1983	96.6977	97.5422	89.4479	96.9606	95.8128	282.221
same_same	Ilf3	ENSMUSG00000032178	-0.122467	0.00052497	-0.240508	4.25e-09	109.865	111.967	106.879	98.4194	100.206	103.383	94.4246	90.1706	93.6761	105.755	100.669	92.7571	299.182
same_same	Mlx	ENSMUSG00000017801	0.159056	0.000525928	0.321978	1.13e-09	38.9465	40.7776	38.3297	43.8246	42.9393	45.0274	51.2462	48.0035	48.3876	40.9773	43.9304	49.2124	134.12
same_same	Hinfp	ENSMUSG00000032119	-0.178956	0.000528369	-0.11378	0.0124504	41.6881	42.3196	40.84	37.6367	36.6047	36.1176	39.3705	39.4734	36.6972	40.2654	36.7863	38.5137	115.565
same_same	Tlnrd1	ENSMUSG00000070462	0.202596	0.000530708	0.0776285	0.13957	38.9868	38.1647	37.4608	46.7619	45.065	40.3884	39.5318	40.6131	40.9009	40.7958	44.0718	40.3486	125.216
same_same	Abi1	ENSMUSG00000058835	0.130803	0.00053077	0.145624	6.76e-05	127.483	133.127	130.534	140.051	150.543	137.88	144.735	142.111	145.715	134.57	142.825	144.187	421.582
same_same	Basp1	ENSMUSG00000045763	-0.136457	0.000530785	-0.205002	7.66e-07	188	180.929	192.759	171.147	171.162	168.586	159.289	163.419	164.432	181.612	170.298	162.38	514.29
same_same	Gtf3c6	ENSMUSG00000019837	0.238591	0.000531031	0.200049	0.00147141	21.731	21.888	23.0751	26.3966	26.2738	25.9193	26.7526	23.6909	25.9581	23.7865	26.1965	25.4672	75.4503
same_same	Dusp7	ENSMUSG00000053716	0.28828	0.000532719	0.526757	1.39e-08	114.179	118.863	115.52	145.181	147.227	133.573	161.129	174.401	166.764	126.522	141.994	167.431	435.946
same_same	Zgrf1	ENSMUSG00000051278	-0.231957	0.000532719	-0.489472	1.2e-09	34.8745	37.1367	37.847	30.7047	32.9485	29.8955	27.882	25.9012	24.3932	35.2295	31.1829	26.0588	92.4712
same_same	Usp16	ENSMUSG00000025616	0.178861	0.000533067	0.145258	0.0020893	57.9763	57.14	62.4669	63.9942	72.1466	64.8718	66.0908	66.238	63.8213	61.2003	67.0042	65.3833	193.588
same_same	Itgal	ENSMUSG00000030830	0.268514	0.000533794	0.387265	8.42e-07	27.6173	28.0132	30.2679	33.3287	37.7951	32.3991	35.4012	37.056	39.5508	30.5366	34.5076	37.336	102.38
same_same	Trib3	ENSMUSG00000032715	0.325228	0.000535683	-0.0822894	0.35787	18.9894	20.0889	18.9235	23.1852	24.6582	24.8516	17.394	19.2014	18.2566	20.7325	24.2317	18.284	63.2482
same_same	Tmem168	ENSMUSG00000029569	0.142363	0.000536323	0.0516502	0.16567	126.838	130.043	139.947	145.886	152.158	139.721	136.925	133.995	139.793	138.625	145.922	136.905	421.452
same_same	Spns1	ENSMUSG00000030741	-0.180966	0.000538092	-0.161747	0.000737709	45.4779	42.2767	43.1089	37.2842	39.4107	38.8789	41.1454	36.9524	38.9064	40.89	38.5246	39.0014	118.416
same_same	Rab35	ENSMUSG00000029518	0.145238	0.00053837	0.0499664	0.188187	87.6498	89.3508	84.6247	92.7014	100.248	96.7186	92.1979	87.8913	90.8533	88.8923	96.5562	90.3142	275.763
same_same	Syngr1	ENSMUSG00000022415	-0.253305	0.000538505	-0.577425	2.78e-10	31.4475	31.14	30.3162	25.2217	26.0612	26.6924	21.4924	20.2029	20.5885	28.8926	25.9918	20.7613	75.6457
same_same	Arl8b	ENSMUSG00000030105	-0.111842	0.000540739	-0.54157	3.24e-18	225.495	233.443	233.889	216.969	214.314	209.784	157.482	156.029	162.284	228.1	213.689	158.598	600.388
same_same	Ppp1r15a	ENSMUSG00000040435	-0.224071	0.000541734	-0.225623	0.000188852	31.4072	27.9703	30.1231	23.7334	26.0612	26.8397	25.7199	25.6594	25.2217	27.2756	25.5448	25.5337	78.3541
same_same	Idua	ENSMUSG00000033540	-0.351178	0.000543101	-0.48701	2.56e-06	11.4501	11.4794	11.6824	9.28189	8.80044	9.0202	8.22908	8.53012	7.94698	10.8146	9.03418	8.23539	28.0841
same_same	Appl1	ENSMUSG00000040760	0.164339	0.000544556	0.0433064	0.323045	74.4257	73.5452	80.8111	87.1401	89.2373	79.93	78.6442	79.603	77.1992	80.4988	85.4358	78.4821	244.417
same_same	Clstn1	ENSMUSG00000039953	-0.145531	0.000546094	-0.0590166	0.11301	88.819	88.9225	87.666	78.9548	76.398	84.3481	84.227	87.4424	83.2745	85.1811	79.9003	84.9813	250.063
same_same	Rbl1	ENSMUSG00000027641	-0.162913	0.000546512	-0.340675	1.37e-09	104.946	109.568	109.1	100.378	96.1246	92.5215	87.9059	82.0895	85.3303	106.349	96.3412	85.1086	287.798
same_same	Tbl1xr1	ENSMUSG00000027630	-0.181023	0.000546709	-0.205743	4.86e-05	95.2295	104.899	95.7761	88.7459	87.1116	85.2685	89.0677	81.7787	85.6678	96.4738	87.042	85.5047	269.02
same_same	Aasdh	ENSMUSG00000055923	-0.354732	0.000551121	-0.042567	0.64844	9.15203	11.7792	10.7652	8.69443	7.82261	8.17341	10.5849	9.56617	10.4937	10.4129	8.23015	10.2149	28.858
same_same	Serp1	ENSMUSG00000027808	0.137278	0.000551343	0.123421	0.000896619	160.543	157.927	167.898	183.954	183.661	167.334	176.231	174.574	178.7	169.926	178.316	176.502	524.744
same_down	Adhfe1	ENSMUSG00000025911	-0.339767	0.000555539	-0.922548	1.28e-11	12.8612	14.0922	12.4065	10.1827	10.6285	10.3456	6.84143	7.2178	6.75033	12.2271	10.3856	6.93652	29.5493
up_up	Trem1	ENSMUSG00000042265	0.642629	0.000555812	1.40464	2.66e-11	5.96696	5.95387	5.45499	9.63437	9.35312	8.28386	14.7801	14.9536	16.3542	7.01441	9.09045	15.3626	31.4675
same_same	Gm15156	ENSMUSG00000084932	0.464898	0.000556805	0.597017	5.43e-06	4.23332	4.11202	4.19986	5.83545	5.86696	5.63302	6.00239	5.94	6.99579	4.71578	5.77848	6.31273	16.807
same_same	Ctss	ENSMUSG00000038642	-0.129857	0.000558841	-0.280952	8.1e-10	428.21	429.792	434.227	376.21	411.622	393.244	354.399	346.903	362.155	413.41	393.692	354.486	1161.59
same_same	Ndufaf7	ENSMUSG00000024082	0.317005	0.000567182	0.390915	1.2e-05	16.2479	14.5206	13.903	18.7596	19.6416	17.5618	19.6207	18.9597	20.1589	15.7277	18.6543	19.5798	53.9618
down_same	Gm6013	ENSMUSG00000110701	-1.03608	0.000571822	-1.48675	3.11e-06	2.25777	1.67051	1.78615	1.0966	0.892798	0.809977	0.451792	0.552559	1.01255	1.51775	0.933123	0.6723	3.12317
same_same	Eif5b	ENSMUSG00000026083	0.13173	0.000572682	0.146403	7.73e-05	152.561	158.27	147.623	163.941	174.478	164.278	169.713	167.46	170.415	156.611	167.566	169.196	493.373
same_same	Chaf1a	ENSMUSG00000002835	-0.142734	0.00058027	-0.478013	3.73e-14	100.511	94.7907	95.7278	87.5709	89.4924	86.8148	69.931	67.2395	71.7683	92.6965	87.9594	69.6462	250.302
same_same	Plin2	ENSMUSG00000028494	-0.152883	0.000591381	0.285469	9.85e-09	161.148	149.232	149.312	135.625	133.282	144.581	181.911	188.733	189.991	144.723	137.829	186.878	469.431
same_same	Rrs1	ENSMUSG00000061024	-0.133482	0.000593814	-0.0669071	0.0528978	101.801	101.858	102.583	94.3463	91.3205	93.4051	98.8135	94.453	98.9537	99.5958	93.024	97.4067	290.026
same_same	Sgtb	ENSMUSG00000042743	0.403209	0.000594623	0.503162	9.64e-06	7.2168	6.59637	5.79291	8.85109	9.52318	7.80523	9.71354	9.35896	8.89816	7.08012	8.7265	9.32355	25.1302
same_same	Oip5os1	ENSMUSG00000085438	-0.151578	0.000597837	-0.0895478	0.0227207	103.414	107.726	107.072	96.422	97.6976	92.411	99.8461	99.3915	99.6901	103.74	95.5102	99.6426	298.893
same_same	Cdkn1b	ENSMUSG00000003031	-0.146621	0.000599258	0.260283	1.4e-08	56.8474	56.5831	58.0256	52.8715	51.1446	50.8077	68.8015	66.7214	69.6511	55.8268	51.6079	68.3914	175.826
same_same	Tfec	ENSMUSG00000029553	0.135797	0.000602282	0.284248	9.35e-10	73.6597	74.3162	76.7078	83.7329	83.3278	79.7459	92.3916	91.3794	89.6873	78.2523	82.2689	91.1527	251.674
same_same	G730013B05Rik	ENSMUSG00000097694	-0.20464	0.000605338	-0.141466	0.00759798	40.8817	40.1779	39.247	32.7412	36.1796	35.6022	35.9175	36.607	36.6359	37.3887	34.841	36.3868	108.616
same_same	Arfgef3	ENSMUSG00000019852	-0.132625	0.000610006	-0.344562	1.55e-11	168.688	171.506	177.553	157.792	159.683	154.669	137.99	136.724	132.889	168.95	157.381	135.868	462.199
same_same	Ifi213	ENSMUSG00000073491	0.178568	0.000610645	0.0564558	0.242237	30.8024	28.6128	31.6196	34.8561	34.0113	34.0559	31.7868	31.5304	31.2663	31.6962	34.3078	31.5278	97.5318
same_same	Utp14a	ENSMUSG00000063785	0.167615	0.000610907	0.167613	0.000254656	46.5262	45.9604	47.5984	50.2867	54.3331	52.7221	50.9557	54.8414	51.5786	47.9485	52.4473	52.4586	152.854
same_same	Ppp6r2	ENSMUSG00000036561	-0.242875	0.000610907	0.120295	0.0560887	15.5222	16.4481	16.9925	13.1983	14.0297	14.0641	18.1362	17.7855	17.2133	15.5463	13.764	17.7117	47.022
down_up	Ccng2	ENSMUSG00000029385	-0.541361	0.000612685	0.406368	0.00114598	3.54792	4.28336	4.00676	2.42817	2.97599	2.72447	5.16334	5.1457	5.3389	3.57276	2.70955	5.21598	11.4983
same_same	C030006K11Rik	ENSMUSG00000116138	-0.427944	0.000613197	-0.0058262	0.961868	7.94251	7.06754	6.90322	5.24799	5.61187	5.48575	7.19641	7.73582	6.99579	6.40625	5.44854	7.30934	19.1641
same_same	Trappc4	ENSMUSG00000032112	0.217987	0.000614594	0.23055	0.000122454	27.698	29.5123	29.1094	31.7229	33.5862	34.9395	33.4004	33.9133	33.8744	30.1149	33.4162	33.7293	97.2604
same_same	Cdkl2	ENSMUSG00000029403	0.179618	0.000615738	0.425973	3.66e-11	28.1415	28.5272	29.0611	31.018	33.9688	32.1414	38.0796	37.8503	39.1212	29.5354	32.3761	38.3504	100.262
same_same	Fignl1	ENSMUSG00000035455	-0.180097	0.00061688	-0.472158	1.45e-11	40.1157	38.7644	41.2745	35.6002	35.3718	35.0131	29.7215	27.1444	29.5787	38.5463	35.3284	28.8149	102.69
same_same	Calcrl	ENSMUSG00000059588	0.179217	0.00061977	0.581719	5.93e-14	168.446	186.24	191.118	208.901	215.377	193.548	265.622	273.862	276.825	195.42	205.942	272.103	673.465
same_same	Gpd1l	ENSMUSG00000050627	-0.147023	0.000620424	-0.0416686	0.27846	62.3709	63.6507	64.6392	57.8846	56.1612	57.9502	62.0892	60.816	62.1644	62.0581	57.332	61.6898	181.08
same_same	Psmd14	ENSMUSG00000026914	0.118726	0.000621669	0.228148	7.36e-09	110.147	105.585	107.265	115.26	120.443	115.238	127.825	124.498	126.078	109.37	116.98	126.134	352.484
same_same	Btbd9	ENSMUSG00000062202	0.215227	0.000625913	-0.0119328	0.850983	31.004	32.2108	31.9093	37.5584	35.5419	37.1853	32.1095	30.5634	31.5731	33.8928	36.7619	31.4154	102.07
same_same	Cdca7	ENSMUSG00000055612	-0.209912	0.00062772	-0.358473	9.09e-08	41.164	40.7776	40.6952	37.7542	34.4365	33.8718	32.4322	33.2226	30.131	39.7423	35.3542	31.9286	107.025
same_same	Stag2	ENSMUSG00000025862	0.160297	0.000628654	0.0537566	0.210444	211.585	216.138	222.013	239.528	261.717	225.1	224.025	221.196	228.897	225.893	242.115	224.706	692.714
same_same	Tep1	ENSMUSG00000006281	-0.135568	0.000628654	-0.0152706	0.686642	110.873	104.899	107.314	99.3202	98.2928	96.645	107.462	110.443	102.083	103.844	98.086	106.663	308.593
same_same	Eif2ak2	ENSMUSG00000024079	0.161919	0.000628654	0.152503	0.000521004	42.2525	40.5634	41.371	46.057	47.1907	45.8005	46.1474	46.6912	45.2886	42.6638	46.3494	46.0424	135.056
same_same	Ep400	ENSMUSG00000029505	-0.129666	0.000633209	-0.22563	7.26e-08	192.434	198.277	188.028	179.058	168.994	180.846	165.905	166.286	162.928	188.454	176.299	165.04	529.793
same_same	Sgsm1	ENSMUSG00000042216	-0.132845	0.000635634	-0.518958	1.14e-15	158.81	161.825	152.788	144.79	141.827	145.28	110.302	114.414	106.011	153.134	143.966	110.242	407.342
same_same	Vbp1	ENSMUSG00000031197	0.165644	0.000635678	0.142827	0.00134284	50.3563	52.0428	48.6604	54.5164	60.7953	54.563	55.2478	56.3955	55.322	51.7399	56.6249	55.6551	164.02
same_same	Rab21	ENSMUSG00000020132	0.126557	0.000636165	0.303542	7.06e-11	129.902	137.924	135.554	149.411	148.672	142.261	164.227	169.083	164.432	140.963	146.782	165.914	453.658
same_same	Sf3b1	ENSMUSG00000025982	0.11816	0.000636252	0.105696	0.00116246	359.106	368.412	377.746	398.886	413.748	386.948	391.155	400.052	397.932	381.681	399.861	396.38	1177.92
same_same	Trim25	ENSMUSG00000000275	-0.117297	0.000638128	-0.22314	1.38e-08	287.664	276.491	274.101	260.363	251.982	260.518	237.578	241.364	239.36	270.318	257.621	239.434	767.374
same_same	Cnot6l	ENSMUSG00000034724	-0.131843	0.000638849	-0.192202	1.52e-06	117.847	122.932	121.361	113.889	113.088	103.714	103.493	105.608	107.729	119.394	110.23	105.61	335.234
same_same	Ubap1	ENSMUSG00000028437	-0.149681	0.000638849	-0.295704	5.48e-09	78.4978	78.5139	77.0939	71.3178	68.1077	71.5357	62.7346	62.5427	65.4168	75.6419	70.3204	63.5647	209.527
same_down	Dhfr	ENSMUSG00000021707	-0.163863	0.000638849	-0.875163	1.03e-18	70.4746	67.7199	68.2598	58.7462	62.7935	62.8469	38.8541	38.8172	35.071	64.9086	61.4622	37.5808	163.952
same_same	Rnf220	ENSMUSG00000028677	-0.143296	0.000640377	-0.225293	4.02e-07	77.6511	80.4414	76.5629	70.4562	69.6808	72.3089	66.4135	67.6539	66.7669	75.8202	70.8153	66.9448	213.58
same_same	Vav1	ENSMUSG00000034116	-0.153483	0.00064941	-0.107745	0.00824426	156.996	158.913	156.65	144.751	133.537	146.275	144.412	147.706	146.482	153.438	141.521	146.2	441.158
same_same	Bclaf1	ENSMUSG00000037608	0.131087	0.000652972	-0.108167	0.00255981	183.444	186.412	194.159	201.46	217.375	198.849	179.297	171.362	172.348	194.01	205.895	174.336	574.241
same_same	Ivd	ENSMUSG00000027332	-0.198576	0.000656707	-0.116812	0.0225163	38.4224	40.6919	39.8745	32.937	34.9467	35.7126	36.8211	34.5694	38.1394	37.8345	34.5321	36.51	108.877
same_same	Idh1	ENSMUSG00000025950	-0.144056	0.000658692	0.0226992	0.566472	111.8	114.58	111.851	102.453	103.862	99.9217	117.982	108.819	116.627	109.628	102.079	114.476	326.184
same_same	Nxf1	ENSMUSG00000010097	0.148785	0.000663102	0.169797	5.94e-05	99.9063	101.687	94.2796	110.169	111.557	106.733	113.271	110.304	109.57	102.045	109.486	111.048	322.58
same_same	Adar	ENSMUSG00000027951	-0.117629	0.000663102	-0.0634742	0.0390998	103.615	103.186	99.7346	96.7353	91.533	94.3255	97.6194	98.6662	97.2661	99.8853	94.198	97.8506	291.934
same_same	Mlkl	ENSMUSG00000012519	0.195232	0.000663102	0.552962	5.74e-13	40.6802	39.6211	39.9228	46.8403	45.5752	45.2851	58.7976	57.8114	59.7711	42.128	45.9002	58.7934	146.822
same_same	Drg1	ENSMUSG00000020457	0.130698	0.000663647	0.0648776	0.060203	91.1977	92.4777	91.9141	98.7719	98.6329	104.119	93.9083	95.0055	99.2298	94.3879	100.508	96.0479	290.944
same_same	Phax	ENSMUSG00000008301	0.189649	0.000665584	0.0682828	0.175328	39.7932	37.6935	38.5228	43.0414	43.0669	46.1319	41.5649	40.7167	39.4587	39.7526	44.08	40.5801	124.413
same_same	Ube2z	ENSMUSG00000014349	0.124906	0.000665587	0.0406863	0.225027	121.597	121.69	120.396	135.038	131.539	130.075	123.017	123.911	127.152	125.708	132.217	124.693	382.618
same_same	Zkscan8	ENSMUSG00000063894	-0.168314	0.000666182	-0.130565	0.00342559	58.0166	61.8088	61.0669	52.3232	55.2259	53.3849	54.6669	55.7048	54.7697	58.3997	53.6447	55.0471	167.091
same_same	Rnf187	ENSMUSG00000020496	-0.140502	0.000666465	-0.102747	0.00587987	97.5275	102.544	105.817	92.5448	92.8085	91.8588	95.7155	93.1061	95.6399	100.302	92.404	94.8205	287.526
same_same	Btrc	ENSMUSG00000025217	0.271648	0.000667567	0.310141	4.71e-05	17.7396	17.0906	19.9373	21.9711	23.2978	20.7649	22.5896	23.1039	22.0306	19.6663	22.0112	22.5747	64.2522
same_same	St3gal3	ENSMUSG00000028538	-0.22671	0.000670111	-0.0905642	0.117691	29.4316	29.4267	28.4818	24.3601	24.8283	25.4775	26.4299	27.9387	27.7377	27.4228	24.8886	27.3688	79.6802
same_up	Rhod	ENSMUSG00000041845	-0.452836	0.000673942	0.113166	0.319631	6.00728	5.39703	5.35844	3.83808	3.91131	4.49169	6.19601	5.66372	6.29008	4.86452	4.08036	6.04994	14.9948
same_same	Kantr	ENSMUSG00000087403	-0.448178	0.00068175	-0.168384	0.133433	8.8698	8.78088	11.6824	7.637	6.8873	6.81117	8.19681	8.84094	8.86748	9.36675	7.11182	8.63507	25.1136
down_same	2210406H18Rik	ENSMUSG00000109036	-0.79351	0.00068228	-0.419855	0.030042	2.62062	3.34102	3.23437	1.87988	1.7856	1.61995	2.51713	2.07209	2.23988	2.81842	1.76181	2.27637	6.8566
same_same	Serinc3	ENSMUSG00000017707	-0.128725	0.00068494	-0.233406	4.35e-08	627.055	645.802	654.406	579.707	598.855	584.141	553.768	527.003	558.436	626.638	587.568	546.402	1760.61
same_same	Ctsa	ENSMUSG00000017760	-0.112452	0.000687463	-0.200799	5.75e-08	494.532	475.752	472.315	437.62	441.765	455.097	420.296	417.182	417.784	461.896	444.827	418.421	1325.14
same_same	S100a10	ENSMUSG00000041959	0.166591	0.00069102	0.397727	1.35e-10	365.355	337.7	337.678	372.646	374.763	420.709	451.599	457.173	462.582	349.342	389.373	457.118	1195.83
same_same	Zer1	ENSMUSG00000039686	-0.356807	0.000691597	-0.446874	1.59e-05	12.6596	12.5931	11.2962	9.67353	9.52318	9.42519	9.29402	9.11722	8.49928	11.1876	9.54063	8.97017	29.6984
same_same	Clcn5	ENSMUSG00000004317	0.183419	0.000693993	-0.0232331	0.658459	65.6366	68.191	66.0874	75.9392	75.9303	75.1806	63.8964	68.6899	64.2815	70.0726	75.6834	65.6226	211.379
same_same	Prkab1	ENSMUSG00000029513	0.19954	0.000699119	0.244922	1.88e-05	38.4224	37.0939	35.4333	41.1223	42.8543	43.6283	42.5653	44.2738	44.859	37.8832	42.535	43.8994	124.317
same_same	Vps26b	ENSMUSG00000031988	-0.14804	0.000699981	-0.0419575	0.284712	66.2816	68.1054	66.184	61.5268	60.6677	58.9074	65.639	64.0623	65.11	65.2721	60.3673	64.9371	190.576
same_same	Snrpa1	ENSMUSG00000030512	0.186032	0.000705542	0.376718	1.75e-09	33.9875	31.5683	32.2472	35.6393	39.2831	36.5962	43.243	41.062	42.7418	33.1516	37.1729	42.3489	112.673
same_same	Gm49254	ENSMUSG00000115739	-0.195032	0.000712023	-0.20678	0.000152206	67.3702	69.0905	68.1149	61.4876	60.4977	56.8457	58.6685	57.8805	60.5995	66.231	59.6103	59.0495	184.891
same_same	Metrn	ENSMUSG00000002274	-0.265316	0.000712023	-0.292078	9.04e-05	18.9088	18.1614	19.2131	15.4307	14.5824	16.6782	15.1996	14.4356	16.2315	17.6017	15.5637	15.2889	48.4544
same_same	Mroh1	ENSMUSG00000022558	-0.157057	0.000713682	-0.362187	2.97e-10	90.7139	96.247	92.2521	85.2211	78.7363	86.1521	73.4808	73.9392	69.8966	91.2401	83.3698	72.4389	247.049
same_same	Wdr3	ENSMUSG00000033285	0.14352	0.000715372	0.0749419	0.0503504	121.153	113.852	119.093	133.432	133.707	124.258	126.631	124.257	122.15	122.125	130.466	124.346	376.937
same_same	Shoc2	ENSMUSG00000024976	0.19928	0.000718085	0.0448698	0.41589	64.1045	63.4365	65.1702	74.7643	80.1818	66.7495	65.994	65.5818	67.1044	67.7903	73.8985	66.2267	207.916
up_down	Olr1	ENSMUSG00000030162	1.19592	0.000719888	-0.237128	0.60185	0.44349	0.299835	0.531017	1.05743	1.06285	0.809977	0.322709	0.310814	0.429566	0.629427	0.976754	0.354363	1.96054
same_same	Dyrk3	ENSMUSG00000016526	-0.252088	0.000724143	0.115763	0.0679015	30.1977	30.112	30.6541	24.9084	26.4438	25.0725	33.3358	30.4943	34.5494	28.5582	25.4749	32.7932	86.8262
same_same	Zmynd8	ENSMUSG00000039671	-0.122832	0.000725286	-0.0658979	0.0439364	172.356	172.876	173.063	159.398	160.066	156.583	163.936	169.048	162.253	168.446	158.682	165.079	492.207
same_same	Pcmtd2	ENSMUSG00000027589	-0.270518	0.000726802	-0.188316	0.00788624	23.9082	23.5585	25.7302	20.9528	20.6619	19.0345	21.686	21.0318	21.3863	23.4138	20.2164	21.368	64.9982
same_same	Pold3	ENSMUSG00000030726	-0.175003	0.00073215	-0.391842	5.86e-10	50.5579	48.8303	52.7637	44.1771	45.3626	45.101	40.1773	37.0214	38.5689	48.5904	44.8802	38.5892	132.06
same_same	Tmem87a	ENSMUSG00000033808	0.135824	0.000738957	0.12163	0.00109278	69.2651	70.0757	70.3838	77.8582	79.1189	73.5975	74.7071	76.184	77.1992	72.7726	76.8582	76.0301	225.661
same_same	R3hdm1	ENSMUSG00000056211	-0.113695	0.000740095	-0.214682	2.01e-08	209.731	214.254	209.607	200.442	198.074	187.252	179.555	181.895	184.529	208.101	195.256	181.993	585.35
same_same	Panx1	ENSMUSG00000031934	-0.407715	0.000742297	-0.336428	0.00189571	10.039	10.3657	8.49626	7.67617	6.75976	7.40025	7.68047	7.63221	7.67083	8.84605	7.27872	7.66117	23.7859
same_same	Ergic1	ENSMUSG00000001576	-0.15559	0.000754195	-0.216983	4.03e-06	122.202	126.273	117.934	106.566	104.16	117.999	105.719	101.843	107.729	116.924	109.575	105.097	331.596
same_same	Cd180	ENSMUSG00000021624	-0.136073	0.000754195	-0.4274	3.08e-13	116.315	116.25	111.61	104.803	101.099	107.285	83.033	86.8898	86.1894	110.888	104.396	85.3707	300.654
up_same	Dusp2	ENSMUSG00000027368	0.617064	0.000754994	0.550108	0.00111847	2.25777	2.18451	2.70336	4.26889	3.35862	3.27673	3.06573	3.7643	3.58995	3.05225	3.63474	3.47333	10.1603
same_same	Aim2	ENSMUSG00000037860	-0.181944	0.000759313	-0.0283645	0.573304	71.7648	71.0181	76.3216	64.6208	65.4293	62.9573	71.8027	70.0368	72.6581	70.6535	64.3358	71.4992	206.488
same_same	Lrp5	ENSMUSG00000024913	-0.177365	0.000764926	-0.112678	0.01694	110.59	114.194	105.576	103.119	92.1282	96.9395	102.492	99.2533	103.924	107.63	97.3956	101.89	306.915
same_same	Nploc4	ENSMUSG00000039703	0.1121	0.000766353	-0.0285895	0.357978	144.981	145.077	141.975	156.696	153.094	157.172	140.217	141.49	141.941	147.916	155.654	141.216	444.785
same_same	Sestd1	ENSMUSG00000042272	-0.133922	0.000766353	-0.150266	9.22e-05	126.153	130.385	129.085	113.145	122.866	115.569	116.24	116.763	114.449	124.205	117.193	115.817	357.216
same_same	Vwa8	ENSMUSG00000058997	-0.147385	0.000766601	-0.218322	1.47e-06	80.9571	83.7825	80.5214	77.3491	74.1022	70.1735	70.3505	69.6914	70.7864	80.551	73.8749	70.2761	224.702
same_same	Csf2ra	ENSMUSG00000059326	0.228348	0.000766629	0.325896	1.89e-06	34.9148	33.967	33.4058	40.1824	42.0465	37.9217	41.7908	46.035	40.7168	35.8517	40.0502	42.8475	118.749
up_same	Dlx1	ENSMUSG00000041911	0.510214	0.000767836	0.625044	1.78e-05	3.83014	4.28336	4.44123	6.93205	5.18673	5.66984	6.29282	6.90698	6.13666	5.21888	5.92954	6.44549	17.5939
up_same	Zfp618	ENSMUSG00000028358	0.562535	0.000767836	0.646202	4.65e-05	3.87046	3.55519	4.34468	5.52214	6.03701	5.78029	6.35736	6.31989	5.7071	4.474	5.77981	6.12812	16.3819
same_same	Atg16l1	ENSMUSG00000026289	0.154024	0.000767957	0.140725	0.000879385	43.6233	41.0774	41.6124	46.8794	46.5955	47.1628	45.0824	49.2813	45.1658	43.1897	46.8792	46.5099	136.579
same_same	Aak1	ENSMUSG00000057230	-0.124469	0.000767975	0.0134894	0.706089	140.385	138.995	139.947	133.745	121.591	129.118	140.798	141.144	141.327	137.562	128.151	141.09	406.803
same_same	Nfam1	ENSMUSG00000058099	0.13768	0.000767975	0.0859611	0.0201966	113.816	117.749	117.693	128.497	128.138	127.461	124.566	122.91	123.071	121.313	128.032	123.515	372.861
same_same	Kat14	ENSMUSG00000027425	-0.131882	0.000767975	-0.105412	0.0030596	71.8857	69.9472	69.1287	65.3257	63.3887	63.9146	65.6067	64.4421	66.1225	68.1339	64.2096	65.3905	197.734
same_same	Slc15a4	ENSMUSG00000029416	-0.216525	0.000767975	-0.22845	0.000168651	42.0106	41.5057	40.6952	35.6002	33.4162	37.7376	33.949	37.125	35.1017	39.267	35.5846	35.3919	110.244
same_same	Gcnt1	ENSMUSG00000038843	0.2341	0.000767975	0.14562	0.0200752	28.7865	28.313	30.2679	34.6994	36.0095	32.1045	30.6896	32.3247	33.4755	31.0934	34.2712	32.1633	97.5279
same_down	Atp6v0d2	ENSMUSG00000028238	0.330704	0.000767975	-1.37293	2.23e-14	37.0113	33.196	30.3162	43.9813	40.7711	42.1188	14.9737	13.2959	10.8005	35.8312	42.2904	13.0234	91.145
same_same	Relt	ENSMUSG00000008318	0.309422	0.000770564	0.446161	1.44e-06	11.5711	11.1796	11.4893	14.804	12.7968	14.7269	15.0382	14.9536	16.5997	12.491	14.1092	15.5305	42.1307
same_same	Srpr	ENSMUSG00000032042	0.124942	0.000772639	0.0959956	0.00486368	129.217	124.089	127.782	137.623	142.678	135.45	135.183	134.824	137.277	129.831	138.584	135.761	404.176
same_same	AW554918	ENSMUSG00000033632	-0.224314	0.000772985	0.0357014	0.554824	22.5374	22.6161	23.0751	20.287	18.9188	19.1449	24.4291	21.8951	23.5034	21.9927	19.4502	23.2759	64.7189
same_same	Ppp4r2	ENSMUSG00000052144	0.1674	0.000773791	0.0785061	0.0797153	63.5804	65.7495	69.9011	76.84	77.3333	69.4739	67.5752	69.8641	72.5047	70.8302	74.5491	69.9813	215.361
same_down	Dscc1	ENSMUSG00000022422	-0.422741	0.000774705	-0.959422	1.18e-09	9.43425	7.83854	8.0618	6.69706	5.56936	6.62709	4.71155	4.10965	4.2343	7.53247	6.29784	4.35183	18.1821
same_same	E2f1	ENSMUSG00000027490	-0.149006	0.00077735	-0.529661	1.98e-14	66.201	64.6787	61.9358	59.2945	54.7583	59.8279	45.0824	43.4449	45.1351	61.9697	57.9602	44.5542	164.484
same_same	Cep104	ENSMUSG00000039523	0.15995	0.00077735	0.0398006	0.366865	42.6557	42.1054	41.6124	47.8194	47.4883	46.0214	41.4035	43.514	45.0124	43.8457	47.1097	43.31	134.265
same_same	Lsg1	ENSMUSG00000022538	0.143949	0.000778386	0.0919204	0.0170655	51.203	51.0148	51.8465	56.0047	57.4792	56.7352	56.2804	54.876	53.0514	52.9553	56.7397	54.7359	164.431
same_same	Mtmr6	ENSMUSG00000021987	0.118372	0.000782796	0.186051	5.12e-07	94.3022	96.8895	97.8036	103.158	107.136	103.383	109.495	109.614	109.509	99.2838	104.559	109.539	313.382
same_same	Pdik1l	ENSMUSG00000050890	-0.198459	0.000784292	-0.0885672	0.0876077	44.1071	48.5304	47.3087	40.574	41.4938	39.8361	43.0171	43.5485	44.859	45.4711	40.6347	43.8082	129.914
same_same	Marchf9	ENSMUSG00000040502	-0.275821	0.000785059	-0.124632	0.0799447	15.7237	15.5486	15.5926	13.3158	12.074	13.2542	14.0701	14.5392	14.3905	14.819	12.8813	14.3333	42.0336
same_same	Mphosph10	ENSMUSG00000030521	0.190108	0.000792133	0.101512	0.0461809	50.316	48.5733	42.3365	52.5974	55.396	53.7898	51.4075	50.8008	49.8911	47.8357	53.9277	50.6998	152.463
same_same	Zfand3	ENSMUSG00000044477	0.153439	0.000792354	0.225838	1.39e-06	56.3636	55.1268	53.1017	60.9002	61.348	61.0428	62.4119	63.337	66.8589	56.3762	61.097	64.2026	181.676
same_same	Rpa2	ENSMUSG00000028884	-0.175898	0.000793717	-0.419757	1.87e-10	57.0087	51.4003	55.3223	48.3285	46.7656	49.74	42.3717	39.4043	40.594	51.6837	48.278	40.79	140.752
same_same	Cfap36	ENSMUSG00000020462	0.246962	0.000799682	0.216374	0.00137971	18.2637	18.1614	18.5373	20.2087	21.8523	23.0843	21.7506	20.9627	21.1101	18.9691	21.7151	21.2745	61.9587
same_same	Asxl2	ENSMUSG00000037486	-0.138676	0.000802385	-0.241334	9.95e-08	104.543	104.3	100.555	91.9573	94.2114	95.025	89.6485	86.8553	85.4223	98.9374	93.7313	87.3087	279.977
same_same	4632404H12Rik	ENSMUSG00000042579	-0.253742	0.000803473	-0.187781	0.00547507	27.3351	31.6968	28.2887	24.3209	23.8079	25.0357	25.9458	26.5573	24.2398	28.1022	24.3882	25.581	78.0713
down_same	Gm13391	ENSMUSG00000086109	-0.88269	0.000807854	-1.03285	5.24e-05	2.70126	2.39868	1.8827	1.37074	1.06285	1.36223	0.839043	1.45047	1.16597	1.88404	1.26528	1.15182	4.30114
same_same	Arid2	ENSMUSG00000033237	0.121499	0.000807947	-0.0208636	0.547715	88.053	92.3492	95.1485	98.6544	101.311	99.5167	91.1975	89.8944	90.1782	95.384	99.8275	90.4234	285.635
same_same	Zrsr2	ENSMUSG00000031370	0.212054	0.00080854	0.0230515	0.711191	33.1005	32.4678	34.1299	37.4801	41.2813	36.854	34.5944	33.4298	33.1993	34.6926	38.5384	33.7412	106.972
same_same	Ccdc86	ENSMUSG00000024732	0.17495	0.000816251	0.140284	0.00319602	35.1164	33.967	32.3437	39.1641	38.1777	37.4062	37.1115	36.9178	37.9246	35.1583	38.2494	37.318	110.726
same_same	Daglb	ENSMUSG00000039206	-0.380271	0.000818527	-0.296099	0.00346002	11.6517	10.4514	13.2271	9.43855	8.67289	8.90975	9.84262	8.42652	10.3096	11.039	9.00706	9.52624	29.5723
same_same	Sympk	ENSMUSG00000023118	-0.119794	0.000819721	-0.0906767	0.00585045	234.485	236.784	241.757	223	218.48	214.644	220.539	219.02	229.787	233.847	218.708	223.116	675.671
same_same	Usp37	ENSMUSG00000033364	-0.145823	0.000821961	-0.320406	1.04e-09	68.4991	65.5354	65.653	61.1743	59.3923	60.0119	54.1183	54.2889	51.7014	64.1209	60.1929	53.3695	177.683
same_same	Stx12	ENSMUSG00000028879	0.164016	0.000823383	0.224109	5.19e-06	62.8547	60.9522	66.6667	75.1559	71.4238	66.7127	75.7398	72.4888	73.9161	67.5916	71.0975	74.0482	212.737
same_same	Acat2	ENSMUSG00000023832	-0.188642	0.000823383	-0.433201	4.69e-10	62.0483	58.4678	58.4118	52.6757	49.6141	54.6366	43.4689	42.6851	46.3625	56.5185	52.3088	44.1722	152.999
same_same	S100a11	ENSMUSG00000027907	0.158658	0.000824846	0.342106	8.22e-10	60.1937	59.6672	57.3981	64.3858	67.8526	65.9027	74.6748	77.4963	72.8729	60.4837	66.047	75.0147	201.545
same_same	Med22	ENSMUSG00000015776	-0.155333	0.000824846	-0.000331333	0.995357	56.041	54.4415	56.2395	50.0517	47.0632	52.3172	55.3768	54.5652	56.6414	53.5776	49.8107	55.5278	158.916
same_same	Stk38l	ENSMUSG00000001630	-0.194339	0.000824846	-0.228693	4.67e-05	41.2849	40.3492	39.9711	35.6393	35.1167	35.5654	35.8852	32.3937	35.4392	38.6532	35.4405	34.5727	108.666
same_same	Arel1	ENSMUSG00000042350	-0.137239	0.000826245	-0.106292	0.00409958	50.0338	50.6293	50.5431	46.3311	45.7878	45.3587	46.341	47.6927	46.4545	49.1678	45.8259	46.8294	141.823
same_same	Eid2b	ENSMUSG00000070705	-0.31211	0.000826245	-0.102554	0.206643	15.2399	13.5782	16.1236	11.7884	11.8615	12.4442	13.3924	13.7104	14.6359	13.8301	12.0313	13.9129	39.7743
same_same	Cdk8	ENSMUSG00000029635	0.148849	0.000826283	0.133043	0.00121763	57.0087	56.1548	55.9498	64.0333	64.579	59.1651	61.7988	62.5773	61.1825	58.7127	62.5925	61.8528	183.158
same_same	Tcerg1	ENSMUSG00000024498	0.121715	0.000826787	-0.096586	0.00428348	147.44	157.156	150.036	163.236	170.057	161.517	141.96	142.18	141.051	156.81	164.937	141.73	463.476
same_same	Tcf12	ENSMUSG00000032228	-0.121142	0.000833207	-0.217469	6.7e-08	210.618	215.153	212.986	188.301	208.787	190.529	184.815	181.826	182.688	205.48	195.872	183.11	584.462
same_same	Ggps1	ENSMUSG00000021302	0.244886	0.000833585	0.306627	1.69e-05	21.731	21.2455	23.1716	25.4958	27.3791	25.4775	26.8171	27.5243	27.3388	23.3043	26.1175	27.2268	76.6485
same_same	Micall1	ENSMUSG00000033039	0.180942	0.000835239	0.231915	1.31e-05	43.2605	46.6029	43.2054	52.7932	48.9763	49.1141	49.7294	53.2528	53.3583	47.5339	50.2945	52.1135	149.942
same_same	Arhgef3	ENSMUSG00000021895	0.359544	0.000835778	0.616924	4.57e-08	6.41045	8.35255	7.24113	9.55604	9.18306	9.42519	10.8107	11.5692	11.3221	8.38324	9.3881	11.234	29.0054
same_same	Armc7	ENSMUSG00000057219	0.269517	0.000838785	0.245582	0.000963327	13.345	14.1351	13.8064	17.7805	16.8356	15.2055	15.9095	16.4386	16.569	15.2407	16.6072	16.3057	48.1536
same_same	Cct6a	ENSMUSG00000029447	0.125724	0.000838932	0.193861	1.09e-06	290.446	275.934	293.797	303.913	325.106	309.522	329.099	324.179	330.49	291.215	312.847	327.923	931.984
same_same	Dab2	ENSMUSG00000022150	0.202856	0.000839913	0.517725	4.79e-11	432.322	427.008	415.931	503.337	501.327	463.381	590.364	617.864	617.716	448.759	489.348	608.648	1546.75
same_same	Tnfaip1	ENSMUSG00000017615	0.12247	0.000840062	0.13661	0.000107344	98.3339	97.1037	92.1072	102.14	104.16	106.954	105.719	103.018	107.576	97.117	104.418	105.438	306.972
same_same	Pcmtd1	ENSMUSG00000051285	-0.257378	0.000840062	-0.263716	0.000259449	22.5374	22.402	22.0131	17.8588	19.8541	18.4086	19.3303	18.2344	18.2259	20.7579	18.7072	18.5969	58.062
same_same	Ddx10	ENSMUSG00000053289	0.172996	0.000844174	0.144457	0.00230023	33.423	34.1812	34.1782	37.1667	40.6436	37.0749	38.2733	37.643	36.5745	35.1754	38.2951	37.4969	110.967
same_same	Tapt1	ENSMUSG00000046985	0.173863	0.000844689	0.140703	0.00312343	48.9855	48.8731	53.0051	56.1222	58.4145	55.4834	54.2474	55.2559	56.488	52.6668	56.6734	55.3304	164.671
same_same	Eng	ENSMUSG00000026814	-0.178895	0.000850501	0.18544	0.000145152	39.39	40.9061	40.4538	35.561	34.2664	36.6699	44.0175	46.2422	46.9761	38.9736	35.4991	45.7453	120.218
same_same	4931406P16Rik	ENSMUSG00000066571	0.153674	0.000853702	0.175251	7.53e-05	57.8956	60.3953	60.2462	67.3231	65.897	65.2768	67.3493	66.6524	67.4419	62.6549	66.1656	67.1479	195.968
same_same	Manba	ENSMUSG00000028164	-0.144378	0.000853952	-0.415265	3.29e-12	89.2222	90.079	90.9969	82.7538	80.9895	80.74	68.8338	65.7545	67.9635	87.9432	81.4944	67.5173	236.955
same_same	Rai1	ENSMUSG00000062115	0.174611	0.000854837	0.119933	0.0116355	79.0219	84.6391	81.7283	99.1635	89.5774	88.1402	84.8724	91.8283	89.9328	88.5103	92.2937	88.8778	269.682
same_same	Eif4e	ENSMUSG00000028156	0.132342	0.000856127	0.0833025	0.0207361	118.936	114.323	111.996	128.067	130.051	120.797	123.436	118.178	124.298	118.129	126.305	121.971	366.404
same_same	Gadd45a	ENSMUSG00000036390	0.203108	0.00085681	0.324332	4.23e-07	59.8309	59.1103	62.2738	68.733	73.9747	66.0131	76.2884	74.2155	76.1867	63.3724	69.5736	75.5635	208.509
same_same	Nemp2	ENSMUSG00000043015	-0.466011	0.000856929	-0.328359	0.00746084	8.26505	8.82372	8.59281	5.60047	6.37713	6.59027	7.16414	7.11419	6.19803	7.67233	6.18929	6.82545	20.6871
same_same	Rnh1	ENSMUSG00000038650	-0.116404	0.000857399	-0.426159	1.04e-14	195.337	193.822	191.359	171.93	175.626	187.841	144.832	146.566	140.806	185.704	178.466	144.068	508.238
same_same	Zfp458	ENSMUSG00000055480	-0.39833	0.000859219	-0.250266	0.0162781	12.2968	12.5074	13.5651	11.0443	10.0759	8.02614	11.4562	10.9821	9.78798	12.3722	9.71543	10.7421	32.8298
same_same	Kif14	ENSMUSG00000041498	-0.18508	0.000862281	-0.307898	2.54e-07	53.5817	53.2421	54.5499	48.2502	48.1686	45.5796	42.2103	44.9299	43.2328	52.0141	47.3328	43.4577	142.805
same_same	Kif1c	ENSMUSG00000020821	-0.110372	0.000862735	-0.227728	4.48e-09	183.323	183.156	177.408	168.445	167.761	167.776	150.092	156.581	157.927	176.336	167.994	154.867	499.197
same_same	Mdm2	ENSMUSG00000020184	-0.128945	0.00086613	0.000572339	0.990488	343.423	331.917	337.051	310.611	321.705	293.764	340.974	336.681	335.184	326.526	308.693	337.613	972.832
same_same	Oxa1l	ENSMUSG00000000959	-0.161351	0.000871667	-0.163274	0.0003261	52.1303	51.8715	52.812	46.8403	44.4273	48.7091	47.5996	45.517	46.8227	50.5079	46.6589	46.6464	143.813
same_same	Jarid2	ENSMUSG00000038518	0.327279	0.000872792	0.717446	2.46e-10	13.1031	14.7776	12.3582	18.9946	15.0925	16.4204	22.0733	21.6879	22.5215	15.3768	16.8359	22.0943	54.3069
same_same	Mmd	ENSMUSG00000003948	0.209533	0.000876656	0.315142	9.82e-07	24.1097	23.3015	24.5233	27.5715	28.7396	26.9133	29.1083	28.664	31.5731	25.1321	27.7415	29.7818	82.6554
same_same	Ddx1	ENSMUSG00000037149	0.121611	0.00088134	0.109931	0.00129629	140.062	135.782	135.651	147.688	150.033	150.103	148.93	145.254	149.949	139.707	149.275	148.044	437.026
same_same	Hdlbp	ENSMUSG00000034088	0.107212	0.000884596	0.0960274	0.00157774	465.302	468.042	451.605	507.332	498.054	486.539	497.036	488.945	494.369	475.66	497.308	493.45	1466.42
same_same	Ssbp3	ENSMUSG00000061887	-0.188508	0.000889674	0.00514464	0.926601	43.7039	39.8781	43.5916	36.6184	36.7323	38.1426	42.4685	42.8578	42.2816	40.0294	37.1644	42.536	119.73
same_same	Pigb	ENSMUSG00000079469	-0.198531	0.000889674	-0.0177438	0.765193	25.1177	25.486	25.2474	21.3053	22.5325	22.2744	26.2685	24.278	24.3625	24.0129	22.0374	24.9697	71.02
same_same	C87436	ENSMUSG00000046679	-0.29959	0.000890867	-0.304507	0.000295169	13.6272	14.0922	12.9375	11.1618	11.4363	10.5297	11.1335	10.7058	11.1074	12.7305	11.0426	10.9822	34.7553
same_same	Fam160a2	ENSMUSG00000044465	-0.230692	0.000891102	-0.342187	1.83e-06	26.9723	29.0412	28.9163	22.9502	24.063	25.2197	21.7506	23.2765	21.9386	26.9692	24.0776	22.3219	73.3687
same_same	Retreg3	ENSMUSG00000017802	-0.188267	0.000892125	-0.186044	0.000426977	43.0992	40.1779	42.8192	37.2059	34.9892	38.2898	35.143	38.0229	37.6791	40.0677	36.8283	36.9483	113.844
same_same	Nsrp1	ENSMUSG00000037958	0.22173	0.000896776	0.0983452	0.102737	26.811	26.5996	26.2129	30.1955	33.6287	29.3064	27.1721	28.6985	29.3946	27.6694	31.0436	28.4217	87.1347
same_same	Nsmf	ENSMUSG00000006476	0.214737	0.000911496	0.200768	0.00079694	21.3682	20.4744	21.9165	25.5742	24.4457	23.9311	23.8482	26.0739	23.4114	22.655	24.6503	24.4445	71.7498
same_same	Per1	ENSMUSG00000020893	0.189691	0.000919396	0.177379	0.000834664	41.7284	43.3047	40.9365	50.5217	46.0854	47.0891	47.18	48.0726	47.3137	44.921	47.8987	47.5221	140.342
same_same	Sdhaf1	ENSMUSG00000074211	-0.374807	0.000921249	-0.0281453	0.789313	10.3615	10.0231	10.7652	7.44118	7.4825	8.98338	11.0689	9.91152	9.54251	9.4098	7.96902	10.1743	27.5531
same_same	Kri1	ENSMUSG00000035047	0.140426	0.000926299	0.106382	0.00589363	68.5797	69.4761	65.4599	71.9445	77.0782	75.5856	73.0936	73.8011	72.4433	68.9601	74.8694	73.1127	216.942
same_up	Mob3b	ENSMUSG00000073910	-0.437486	0.000926299	0.140956	0.196186	7.05553	8.56671	9.5583	5.99211	6.16456	6.29573	9.77808	9.39349	8.43791	8.03904	6.1508	9.20316	23.393
same_same	Samd9l	ENSMUSG00000047735	0.205841	0.000928975	0.411622	5.21e-09	63.7013	66.8204	70.4321	79.1898	80.3093	72.1616	92.6497	88.1331	86.0974	72.1474	77.2202	88.9601	238.328
same_same	Cnbp	ENSMUSG00000030057	0.104854	0.000936499	0.0690667	0.0177969	591.334	580.266	606.276	626.626	646.811	638.409	618.472	619.107	627.382	604.389	637.282	621.653	1863.32
same_same	Rnf24	ENSMUSG00000048911	0.227911	0.000938604	0.241601	0.000194265	21.4488	21.9308	20.6614	24.9475	25.5935	24.5939	25.8813	24.9687	24.9455	22.5132	25.045	25.2652	72.8234
same_same	U2af1	ENSMUSG00000061613	0.164641	0.000944946	0.140433	0.00218643	67.088	59.0675	61.3083	67.0881	69.4257	73.7447	69.5115	68.8626	68.5465	62.488	70.0862	68.9735	201.548
same_same	Polr2a	ENSMUSG00000005198	-0.116154	0.000948476	-0.194444	3.44e-07	506.345	515.588	476.467	461.862	463.192	457.637	439.981	433.171	436.47	484.639	460.897	436.541	1382.08
same_same	Mmgt2	ENSMUSG00000048497	-0.224673	0.000948476	0.085326	0.14505	26.0047	25.743	25.344	22.4802	21.7673	21.7589	28.0111	26.3156	27.4616	24.5224	22.0021	27.2628	73.7873
same_up	Sting1	ENSMUSG00000024349	0.308983	0.000948476	0.961377	3.87e-14	8.74885	9.25205	9.1721	11.5534	11.6914	10.4561	17.0713	18.5798	17.2747	9.99252	11.2336	17.6419	38.8681
same_same	Tm7sf3	ENSMUSG00000040234	-0.214866	0.000952825	-0.145915	0.0119403	55.9201	58.2965	60.8255	49.9734	48.4662	51.9858	54.2151	50.6972	52.9594	56.3651	50.1418	52.6239	159.131
same_same	Ccl9	ENSMUSG00000019122	0.114655	0.000954985	0.167593	3.46e-06	582.545	566.388	570.891	613.036	611.056	637.967	648.516	647.391	635.82	583.438	620.687	643.909	1848.03
same_same	Rpl23	ENSMUSG00000071415	0.153626	0.000954985	0.20524	1.33e-05	372.733	350.721	346.416	375.662	394.362	420.157	405.516	406.096	421.988	357.6	396.727	411.2	1165.53
same_same	Csnk1g3	ENSMUSG00000073563	0.144153	0.000955585	0.194758	7.55e-06	54.5896	55.9406	57.5429	61.7226	63.2611	60.6746	65.0258	62.1283	64.9259	58.4021	61.8861	64.0267	184.315
same_same	Nsf	ENSMUSG00000034187	0.125045	0.000956123	0.144426	8.16e-05	110.348	107.427	113.782	117.766	122.696	120.981	122.145	122.323	121.813	112.992	120.481	122.094	355.567
same_same	Plod3	ENSMUSG00000004846	0.135786	0.000957204	0.407885	6.05e-13	88.6174	89.565	86.7488	97.6361	93.021	100.29	113.045	118.351	120.217	91.3166	96.9824	117.204	305.503
same_same	Rnmt	ENSMUSG00000009535	0.170183	0.00096264	0.120724	0.00986615	58.1375	61.6803	64.5909	69.3596	71.849	66.1236	66.3167	66.756	67.043	65.2103	69.1107	66.7052	201.026
same_same	Plcb4	ENSMUSG00000039943	0.146737	0.000963389	-0.181271	4.44e-05	170.26	181.058	174.753	195.468	195.778	191.155	159.063	147.982	156.7	183.759	194.133	154.582	532.475
same_same	Zmiz1	ENSMUSG00000007817	-0.104495	0.000964364	-0.571281	5.89e-19	375.273	380.019	370.843	355.963	349.126	342.473	247.389	258.183	252.432	368.942	349.187	252.668	970.797
same_same	5830432E09Rik	ENSMUSG00000097471	0.374446	0.000964364	0.540912	1.67e-06	7.05553	6.72487	7.57905	9.7127	8.71541	9.16747	10.488	10.9476	9.63456	8.00554	9.19853	10.3567	27.5608
same_same	Snx6	ENSMUSG00000005656	0.126964	0.000968008	0.302483	1.46e-10	71.2407	70.5897	76.756	79.3073	78.5237	80.4455	87.2605	90.3433	91.559	75.551	79.4255	89.7209	244.697
same_same	Rnf145	ENSMUSG00000019189	-0.15182	0.000968008	-0.0405667	0.33019	44.2684	43.7759	42.9641	40.0257	39.7082	38.3266	42.4362	42.029	42.9566	42.2552	39.3535	42.4739	124.083
same_same	Wbp1	ENSMUSG00000030035	-0.270605	0.000974143	-0.187667	0.00982348	16.0463	15.7199	14.9167	13.5508	12.3291	12.8492	13.8442	12.9851	14.1757	14.7291	12.9097	13.6683	41.3072
same_same	Adrm1	ENSMUSG00000039041	0.137582	0.00097557	0.0687238	0.0671825	49.3484	47.5881	48.0811	53.929	52.59	53.0535	51.4721	49.9029	50.7502	49.8661	53.1908	50.7084	153.765
same_same	Rfc1	ENSMUSG00000029191	-0.116526	0.00097949	-0.261318	9.83e-10	116.033	118.52	118.272	108.72	110.027	106.733	99.0394	96.1106	99.0764	115.171	108.493	98.0755	321.739
same_same	Rrp8	ENSMUSG00000030888	0.211649	0.000985751	0.224831	0.000207139	36.7694	35.4234	32.7299	39.9866	39.9208	41.8243	40.5968	41.2001	41.1463	36.0466	40.5772	40.9811	117.605
same_same	Cyp4v3	ENSMUSG00000079057	-0.198558	0.00098685	-0.663194	2.2e-13	31.77	30.626	32.5851	26.2791	28.3144	28.1283	20.008	20.4792	19.4839	29.8301	27.574	19.9904	77.3944
same_same	Nfatc2	ENSMUSG00000027544	0.245311	0.00098685	0.571268	1.32e-10	18.8282	19.2751	21.1924	25.3392	22.0223	22.6794	28.3984	30.3907	29.1185	21.9356	23.347	29.3025	74.585
same_same	Trmt10a	ENSMUSG00000004127	0.275219	0.000994251	0.179399	0.0174765	13.6272	14.1779	14.434	16.3314	17.3033	17.4145	15.7805	16.5077	15.5258	14.9811	17.0164	15.938	47.9355
same_same	Hsd17b7	ENSMUSG00000026675	0.163275	0.00100115	-0.0890912	0.0503789	188.322	192.066	195.511	217.517	219.246	208.127	176.328	180.203	184.683	201.698	214.963	180.405	597.066
same_same	Lpcat1	ENSMUSG00000021608	-0.227044	0.00100756	-0.275184	4.15e-05	30.883	32.1252	32.6817	26.9841	27.039	27.6129	26.4944	25.5904	26.8479	30.597	27.212	26.3109	84.1198
same_same	Ubqln2	ENSMUSG00000050148	-0.185436	0.00102279	-0.307201	3.64e-07	53.622	54.1845	57.8325	46.4486	49.2314	49.74	43.9852	46.8293	42.9873	52.8219	48.4733	44.6006	145.896
same_same	Lmo2	ENSMUSG00000032698	0.182643	0.00103101	-0.0587857	0.255785	40.4382	41.6342	42.0951	45.4304	46.553	48.7459	39.8223	37.5394	41.6066	43.0532	46.9098	39.6561	129.619
same_up	Lrrc25	ENSMUSG00000049988	-0.37424	0.00103599	0.213578	0.0218891	8.99076	8.30971	10.0893	7.40202	6.2921	7.28979	10.4235	10.6713	10.5551	8.60035	6.99464	10.5499	26.1449
same_same	Hbs1l	ENSMUSG00000019977	0.147971	0.00103796	0.161274	0.00016573	49.3484	50.8863	50.4466	56.4355	56.1187	54.4157	57.2808	55.4285	55.7209	52.5894	55.6566	56.1434	164.39
same_same	1110002L01Rik	ENSMUSG00000071456	-0.209087	0.00103818	0.0357499	0.5373	25.3596	24.3295	25.0543	20.992	22.8301	20.949	25.2358	26.212	25.2217	23.4586	21.5903	25.5565	70.6054
same_same	Atg2a	ENSMUSG00000024773	-0.190919	0.00104172	-0.239417	2.68e-05	35.6002	33.6672	34.1782	30.078	29.2072	31.2946	29.3988	28.0078	30.1924	32.6411	30.1933	29.1997	92.0341
same_up	Ptgs1	ENSMUSG00000047250	0.298695	0.00104546	1.013	6.98e-15	14.7964	13.5782	12.3582	16.9189	17.0907	16.3468	27.8175	27.2135	27.5229	14.2851	16.7855	27.518	58.5886
down_same	Dchs1	ENSMUSG00000036862	-0.53422	0.00104826	-0.103796	0.465906	6.97489	7.19604	7.77215	5.05217	4.67656	5.33849	6.16374	7.2178	6.99579	6.67345	5.02241	6.79244	18.4883
same_same	Serinc1	ENSMUSG00000019877	0.115209	0.00104834	0.127644	0.000172831	194.491	199.562	198.021	211.604	224.773	205.145	219.119	213.011	214.63	203.062	213.84	215.587	632.489
same_same	Cinp	ENSMUSG00000021276	0.211204	0.00104834	0.165793	0.00471688	31.125	28.7413	30.7024	34.5427	34.8616	35.4181	33.3358	32.2556	35.8688	31.3288	34.9408	33.8201	100.09
same_same	Lyz2	ENSMUSG00000069516	-0.0895817	0.00105173	0.0107312	0.691672	7619.28	7523.63	7723.73	7023.18	7246.63	7220.14	7759.08	7425.32	7852.9	7423.52	7163.32	7679.1	22265.9
same_same	Gabpb1	ENSMUSG00000027361	0.217961	0.00105306	0.0939886	0.11849	27.2545	25.1433	27.2267	31.1746	32.8635	28.7542	28.7534	29.5273	26.7865	27.8482	30.9308	28.3557	87.1347
same_same	Invs	ENSMUSG00000028344	-0.226005	0.00105988	-0.000522037	0.994724	22.618	24.201	25.4405	20.3262	21.2996	20.0653	24.4613	24.1744	23.442	23.3226	20.5637	24.0259	67.9122
same_same	Btaf1	ENSMUSG00000040565	0.11003	0.00106099	0.0960612	0.00215275	143.53	150.003	148.25	155.364	163.722	157.725	159.902	157.134	155.073	151.206	158.937	157.37	467.513
same_same	Kntc1	ENSMUSG00000029414	-0.120215	0.00106312	-0.433279	2.48e-14	103.777	103.957	109.003	96.2654	98.888	96.1296	77.9342	79.0159	77.4754	103.075	97.0943	78.1418	278.311
same_down	Slc6a8	ENSMUSG00000019558	-0.275596	0.00106541	-1.36768	7.58e-17	77.4495	75.5584	65.1219	60.9785	56.5864	62.9205	30.141	28.5949	26.1422	67.2196	60.1618	28.2927	155.674
same_same	Aff1	ENSMUSG00000029313	-0.141862	0.00106687	-0.202126	5.98e-06	334.392	342.669	329.085	317.817	303.679	290.561	282.403	296.275	296.002	329.857	304.019	291.56	925.436
same_same	Psmd10	ENSMUSG00000031429	-0.165666	0.00107055	-0.0364544	0.430196	46.3649	45.1894	44.1226	40.6132	42.1741	38.4739	45.4374	42.5125	44.3987	43.3084	40.4204	44.1162	127.845
same_same	Rbbp6	ENSMUSG00000030779	0.136633	0.00107128	-0.12098	0.00211021	158.729	166.751	158.291	172.831	186.552	172.783	150.866	147.671	146.39	165.958	177.389	148.309	491.656
up_same	Slc39a7	ENSMUSG00000024327	0.516722	0.00107413	0.728227	2.75e-06	4.79776	3.72652	3.62057	5.91378	5.31427	6.2221	7.22868	6.97605	6.10598	4.42029	5.81672	6.77024	17.0072
same_same	Csgalnact2	ENSMUSG00000042042	-0.135787	0.001083	-0.270668	1.35e-08	121.637	123.918	125.996	112.91	116.319	109.016	104.3	101.222	102.298	120.941	112.748	102.606	336.296
same_same	Bcl9	ENSMUSG00000038256	0.172881	0.001083	0.0546931	0.260405	37.0516	37.6079	37.5574	43.1197	41.7914	41.5666	38.5637	41.4764	36.6666	39.4283	42.1592	38.9022	120.49
same_same	Eif2s1	ENSMUSG00000021116	0.113648	0.00108561	0.0611974	0.0528919	129.943	131.242	131.933	143.262	144.463	137.696	137.732	135.515	136.817	135.479	141.807	136.688	413.974
same_same	Rbms1	ENSMUSG00000026970	0.111928	0.00109209	0.239162	3.36e-09	230.575	229.117	229.303	248.144	255.043	241.557	262.685	275.001	275.567	235.521	248.248	271.084	754.853
same_same	Prmt6	ENSMUSG00000049300	0.172343	0.00109375	0.0629551	0.189985	34.5116	33.2817	35.4333	38.655	38.7304	38.8421	34.3685	36.089	37.2495	35.79	38.7425	35.9023	110.435
same_same	Fhod3	ENSMUSG00000034295	-0.271575	0.00109451	-0.236547	0.00178491	22.618	22.2735	21.2407	17.9763	18.1536	18.7031	19.298	19.2014	17.7656	20.4968	18.2777	18.755	57.5295
same_same	Kifc5b	ENSMUSG00000024301	-0.270333	0.00109772	-0.294824	0.000171775	19.0701	20.4744	19.9855	16.4098	16.368	16.5309	14.5864	17.4401	16.5076	18.9566	16.4362	16.1781	51.5708
same_same	Coq10a	ENSMUSG00000039914	-0.274859	0.00109772	-0.418104	1.76e-06	15.6431	17.2191	14.6754	13.5508	11.8189	13.8801	11.9725	12.2944	11.4142	15.1484	13.0833	11.8937	40.1254
same_same	Cntrob	ENSMUSG00000032782	-0.314665	0.00110352	-0.208517	0.0141963	15.7237	16.2339	16.3167	12.1409	13.6471	13.0333	14.7155	13.1578	13.8382	14.8972	12.9404	13.9038	41.7414
same_same	Tmem268	ENSMUSG00000045917	-0.294825	0.00110845	-0.187808	0.0182932	18.9088	17.7759	16.4615	14.1382	14.6249	14.69	15.6514	16.1623	15.0348	16.1252	14.4844	15.6162	46.2258
same_same	Cfl1	ENSMUSG00000056201	0.126187	0.00111196	0.222433	1.8e-07	811.829	807.884	765.05	836.35	862.145	904.339	918.333	913.345	950.753	803.095	867.611	927.477	2598.18
same_same	Ankrd26	ENSMUSG00000007827	-0.204217	0.00111423	-0.266169	1.76e-05	42.7767	42.0197	40.0193	38.0283	36.3496	34.2031	34.433	35.2601	34.2733	40.0225	36.1937	34.6555	110.872
same_same	Bub1b	ENSMUSG00000040084	-0.12835	0.00112091	-0.180176	6.66e-06	122.363	117.492	121.361	111.892	107.178	111.261	107.559	104.088	107.085	116.915	110.111	106.244	333.27
same_up	1600014C10Rik	ENSMUSG00000054676	-0.212461	0.00112091	0.337044	2.49e-07	29.6735	30.5832	29.0128	25.2217	25.5085	26.3243	37.3374	38.092	37.4336	28.2726	25.6848	37.621	91.5784
same_same	Atmin	ENSMUSG00000047388	0.157508	0.00112795	0.0492859	0.268205	47.5744	48.4019	50.881	55.0256	53.908	54.5998	49.0195	48.9014	53.6651	51.4362	54.5111	50.5287	156.476
up_up	Bdkrb2	ENSMUSG00000021070	0.837196	0.00113211	1.45962	2.27e-08	1.29015	1.54201	1.4965	2.81982	2.67839	2.24585	3.87251	3.6607	4.32635	1.95278	2.58135	3.95318	8.48731
same_down	Rgs1	ENSMUSG00000026358	-0.281559	0.00113525	-0.78231	2.5e-11	58.6617	52.2998	56.1912	44.0205	48.6787	45.0642	34.2394	33.4643	29.6708	50.8372	45.9211	32.4582	129.216
same_same	Bcs1l	ENSMUSG00000026172	-0.355668	0.0011371	-0.22622	0.0180441	10.16	10.8797	10.4755	8.02864	8.84295	7.80523	9.4231	9.46256	8.10039	9.79463	8.22561	8.99535	27.0156
same_same	Oma1	ENSMUSG00000035069	-0.297853	0.00114178	-0.27424	0.00109372	17.6187	17.0906	17.0891	14.0208	12.9243	15.095	13.8765	15.368	13.6848	16.0668	14.0134	14.3098	44.3899
same_same	Dnajb1	ENSMUSG00000005483	0.194093	0.00114339	0.0601945	0.274053	38.7449	37.1795	36.6401	41.6314	43.0669	44.1806	39.8223	38.9899	38.6917	38.4837	42.9596	39.1679	120.611
same_same	Pramef8	ENSMUSG00000046862	0.188074	0.00114562	0.152115	0.00389828	23.7469	23.8155	24.5233	28.5506	26.4863	26.987	26.0749	27.697	26.3263	25.6298	27.3413	26.6994	79.6705
down_same	Fndc10	ENSMUSG00000074738	-0.656362	0.00114653	-0.321538	0.0592498	4.75744	4.92586	4.92397	3.6031	3.14605	2.54038	4.90518	3.69524	3.09901	4.48431	3.09651	3.89981	11.4806
same_same	Lgals3bp	ENSMUSG00000033880	-0.15004	0.00115076	-0.115461	0.00581605	76.361	79.4563	77.9146	67.4406	71.6789	71.4989	72.545	69.5533	73.4865	74.9372	70.2061	71.8616	217.005
same_same	Slc25a44	ENSMUSG00000050144	-0.18203	0.00115472	-0.335925	6.49e-08	47.9776	48.7018	47.357	44.3338	40.1759	42.3765	38.951	37.6776	37.5257	46.7975	42.2954	38.0514	127.144
same_same	Gas8	ENSMUSG00000040220	0.217445	0.00115472	0.154232	0.010874	21.9729	22.2735	19.8407	24.3992	24.1055	26.1034	24.0418	24.3471	23.1659	22.1711	24.8694	23.8516	70.8921
same_same	Snw1	ENSMUSG00000021039	0.135509	0.00115584	-0.0235707	0.557188	71.2407	71.7462	71.4941	77.8582	81.4997	76.4324	72.2222	67.274	71.3694	73.6995	78.5968	70.2885	222.585
same_same	D330041H03Rik	ENSMUSG00000073437	-0.439109	0.00116288	-0.361015	0.00285675	5.88633	6.16803	6.61357	4.50387	4.08136	5.08077	5.16334	4.59314	4.72523	5.76183	4.55533	4.82724	15.1444
same_same	Pank1	ENSMUSG00000033610	-0.221875	0.001166	-0.0962344	0.108885	22.9002	20.5173	22.0131	19.6212	18.2386	18.2613	20.4275	20.272	20.5271	20.7172	18.707	20.4089	59.8331
same_same	Klf11	ENSMUSG00000020653	-0.475037	0.00116925	-0.623433	1.83e-05	6.5314	6.46787	6.3722	4.1514	5.22924	4.60214	3.5498	4.38593	4.63318	5.66382	4.66093	4.18964	14.5144
same_same	Wdr47	ENSMUSG00000040389	0.223058	0.00117514	0.171502	0.00606557	20.1586	21.0741	23.5096	23.6943	26.4438	25.2197	24.2032	24.7961	23.6875	22.7593	25.1193	24.2289	72.1075
same_same	Psma6	ENSMUSG00000021024	0.123884	0.00117649	0.271755	1.67e-09	101.882	94.3195	98.2863	103.863	107.476	109.605	120.403	117.522	117.701	98.823	106.981	118.542	324.346
same_same	Snx16	ENSMUSG00000027534	-0.262169	0.0011774	-0.336931	2.25e-05	13.6676	15.3773	15.2064	12.3367	12.7543	11.7815	11.4884	12.0527	11.4449	14.3068	12.2908	11.662	38.2596
same_same	Sec24b	ENSMUSG00000001052	0.113253	0.00118056	-0.00125862	0.973743	106.921	107.341	101.955	116.787	113.683	111.85	104.235	105.021	106.87	108.694	114.107	105.375	328.177
down_same	Zfp473	ENSMUSG00000048012	-0.573667	0.00118132	-0.454223	0.00368082	3.62856	3.42669	3.04128	2.42817	2.25325	2.13539	2.61394	2.90093	1.93305	2.96538	2.27227	2.48264	7.72029
same_same	Uvrag	ENSMUSG00000035354	-0.138964	0.00118578	-0.0284198	0.47463	66.7251	67.3772	64.3496	59.8036	59.6899	60.8219	66.3489	62.0247	66.2146	63.8435	60.1051	64.8627	188.811
same_same	Gtf2e2	ENSMUSG00000031585	0.173713	0.00121599	0.292749	2.32e-07	39.39	38.8072	39.4883	43.6288	45.4477	43.7388	47.3414	48.5215	48.2955	40.6415	44.2717	48.0528	132.966
same_same	Tbc1d20	ENSMUSG00000027465	-0.132901	0.00121907	-0.284804	3.79e-09	82.4892	82.7116	77.287	75.4692	72.3591	73.5238	66.0262	65.8581	67.3499	78.4893	73.7841	66.4114	218.685
same_same	Cybb	ENSMUSG00000015340	-0.131789	0.00121978	-0.176247	1.93e-05	1625.19	1695.65	1730.34	1504.1	1571.32	1534.72	1491.88	1424.05	1554.2	1643.36	1536.71	1490.04	4670.12
same_same	Btbd19	ENSMUSG00000073771	0.364948	0.00121978	0.229362	0.0251708	14.1111	13.6211	13.6133	18.3288	17.3883	17.5618	16.1032	16.5077	15.9246	15.1877	17.7596	16.1785	49.1259
same_same	Rsbn1	ENSMUSG00000044098	-0.160541	0.00123489	0.00100375	0.986264	117.081	112.609	119.334	101.396	115.256	95.9823	113.077	118.627	117.486	111.113	104.211	116.397	331.721
same_same	Xbp1	ENSMUSG00000020484	0.107476	0.00123639	-0.0179924	0.576162	139.861	140.323	136.278	146.043	150.968	151.797	136.861	136.689	137.86	140.881	149.603	137.137	427.621
same_same	Taf6	ENSMUSG00000036980	-0.206804	0.00123805	-0.106704	0.0588537	33.9875	32.4678	33.5023	29.2556	30.2701	27.2447	32.4322	30.8742	29.5787	31.7419	28.9235	30.9617	91.6271
same_same	Tigar	ENSMUSG00000038028	0.134744	0.00123954	0.297292	1.31e-09	75.6352	70.7182	73.763	77.2708	79.2039	85.0476	90.5521	90.1361	89.8714	73.9173	80.5074	90.1865	244.611
same_same	Sgpp1	ENSMUSG00000021054	-0.166916	0.00123954	0.0586838	0.198501	54.1461	56.4118	60.6807	50.6392	53.4828	48.3041	59.5398	59.2274	59.1881	55.9106	50.8087	59.3184	166.038
same_same	Calm1	ENSMUSG00000001175	0.106455	0.00124358	0.217279	1.31e-08	700.634	694.975	720.3	747.486	772.865	757.55	808.934	815.611	835.169	720.92	759.3	819.905	2300.13
same_same	Adcy7	ENSMUSG00000031659	0.129482	0.00124358	0.124161	0.00110097	334.634	344.639	338.74	376.915	370.469	366.22	367.243	375.464	366.819	353.432	371.201	369.842	1094.47
same_same	Nav1	ENSMUSG00000009418	-0.118233	0.00124358	-0.10233	0.00269706	221.785	232.201	221.193	211.016	199.902	210.999	210.277	213.115	205.701	221.47	207.306	209.698	638.473
same_same	Sptbn1	ENSMUSG00000020315	0.118849	0.00124482	0.161194	1.59e-05	502.434	504.751	502.921	554.329	560.89	524.681	562.385	571.829	554.447	520.667	546.633	562.887	1630.19
same_same	Psma4	ENSMUSG00000032301	0.133651	0.00124509	0.229857	1.97e-07	65.1124	63.5222	62.9496	68.9288	71.2113	70.2103	74.1585	75.9423	74.7445	65.1335	70.1168	74.9484	210.199
same_same	Atg9a	ENSMUSG00000033124	-0.181252	0.0012466	0.145277	0.00331693	45.8004	47.0313	46.5364	41.0831	38.9855	42.6343	48.9549	52.5621	52.5912	44.8836	40.901	51.3694	137.154
same_same	Telo2	ENSMUSG00000024170	-0.157394	0.00125055	-0.259821	5.16e-07	43.6233	41.8484	44.2675	38.6158	39.6232	38.1057	35.9498	36.5725	35.8074	41.5772	38.7816	36.1099	116.469
same_down	Plekhg5	ENSMUSG00000039713	0.384426	0.00125373	-0.169884	0.137202	5.56379	5.7397	5.74463	7.55867	7.43998	7.25298	5.00199	5.1457	5.00138	6.34767	7.41721	5.04969	18.8146
same_same	Abracl	ENSMUSG00000078453	0.169471	0.00125572	0.271234	6.12e-07	33.7456	36.9225	33.8885	36.9709	40.6436	40.0571	41.1131	42.8578	42.2816	35.9273	39.2238	42.0842	117.235
same_same	Cxcl16	ENSMUSG00000018920	-0.202158	0.00125721	-0.113654	0.0407618	49.7919	55.598	55.4671	45.2737	46.1279	48.0832	48.245	48.9014	51.1798	52.1129	46.4949	49.4421	148.05
same_same	Map1s	ENSMUSG00000019261	-0.144004	0.00126486	-0.355217	2.35e-10	89.1415	94.8335	94.0382	86.0044	80.8195	84.4585	71.3509	75.148	70.8171	91.6254	83.7608	72.4387	247.825
same_same	Prr12	ENSMUSG00000046574	-0.178277	0.00127046	-0.316284	1.61e-07	57.7747	62.7083	57.2532	54.3598	49.6141	53.0167	47.3414	49.2122	46.3625	58.1071	52.3302	47.6387	158.076
same_same	Zfp609	ENSMUSG00000040524	0.164205	0.00127889	0.330864	8.04e-09	55.9201	52.8138	49.9638	61.2135	58.3295	58.6497	67.0266	65.5127	67.4419	54.6637	59.3976	66.6604	180.722
same_same	Abhd8	ENSMUSG00000007950	-0.265176	0.00127949	-0.187831	0.0104138	18.9491	20.2174	21.2407	16.4098	15.6027	18.0036	18.3299	17.1293	17.4281	19.2893	16.672	17.6291	53.5904
same_same	Slc1a4	ENSMUSG00000020142	0.353839	0.0012809	0.327743	0.00124935	12.0146	10.3657	11.8755	15.1957	15.3476	13.3278	14.7478	14.8845	13.4086	12.479	14.6237	14.347	41.4496
same_same	Rcor1	ENSMUSG00000037896	0.165304	0.00128156	-0.00931841	0.857834	99.745	102.929	97.9001	117.727	114.618	105.113	99.3943	102.051	97.4195	106.186	112.486	99.6215	318.293
same_same	Nek7	ENSMUSG00000026393	-0.15722	0.00128346	-0.268538	3.28e-07	87.8917	86.6523	92.7348	80.1689	80.947	78.4205	76.9015	73.1449	71.6455	86.5187	79.8455	73.8973	240.261
same_same	Sigmar1	ENSMUSG00000036078	0.154409	0.00129143	0.0487155	0.271781	69.5473	68.8335	73.4734	74.9209	79.374	81.1818	74.0294	69.9677	74.7445	72.4093	78.4922	72.9139	223.815
same_same	Zfp143	ENSMUSG00000061079	0.218782	0.00129216	0.0813579	0.190443	23.4243	22.7875	23.413	26.7882	27.4642	26.8029	25.3004	23.1039	25.1603	24.3296	27.0184	24.5215	75.8695
same_same	Sesn1	ENSMUSG00000038332	-0.234052	0.0012986	0.00957854	0.892075	30.9637	29.341	29.3507	26.6316	23.4253	26.1034	31.9159	28.9748	29.4253	28.4411	25.3868	30.1053	83.9332
up_same	Vmn2r96	ENSMUSG00000091679	0.542848	0.0012987	0.273117	0.0795957	2.53999	2.95552	2.75163	3.87725	3.95382	4.16034	3.48526	3.31535	3.16038	3.1948	3.99713	3.32033	10.5123
same_same	Rbsn	ENSMUSG00000014550	0.131889	0.00130595	0.0105884	0.79735	76.5222	79.0279	77.1905	85.4952	84.008	85.4526	79.1282	76.3221	78.9175	80.5712	84.9853	78.1226	243.679
[truncated: 8,842 more rows]

## Sheet: Table S2
Table S2. Differentially expressed genes by bzATP with slow kinetics.
Symbol	Gene Name	Trend for 8hrs vs 3 hrs	Immunity	Enzyme	Regulation-Immunity	Function
Clec12a	C-type lectin domain family 12 member	Down	Membrane			Cell surface receptor that modulates signaling cascades and mediates tyrosine phosphorylation of target MAP kinases
Tm4sf19	Transmembrane 4 L six family member 19	Down	Membrane
Vwf	Von Willebrand factor	Down	Extracellular		immune	Important in the maintenance of hemostasis, it promotes adhesion of platelets to the sites of vascular injury by forming a molecular bridge between sub-endothelial collagen matrix and platelet-surface receptor complex GPIb-IX-V.
Tnfrsf1b	Tumor necrosis factor receptor superfamily member 1B	Down	Membrane		Immune	Receptor with high affinity for TNFSF2/TNF-alpha and approximately 5-fold lower affinity for homotrimeric TNFSF1/lymphotoxin-alpha. The TRAF1/TRAF2 complex recruits the apoptotic suppressors BIRC2 and BIRC3 to TNFRSF1B/TNFR2 (By similarity)
Fam20c	Extracellular serine/threonine protein kinase FAM20C, EC 2.7.11.1	Down	Extracellular	Kinase		Golgi serine/threonine protein kinase that phosphorylates secretory pathway proteins within Ser-x-Glu/pSer motifs and plays a key role in biomineralization of bones and teeth. Constitutes the main protein kinase for extracellular proteins, generating the majority of the extracellular phosphoproteome (By similarity).
Aig1	Androgen-induced gene 1 protein, AIG-1	Down	Membrane			May play a role in androgen-regulated growth of hair follicles; Belongs to the AIG1 family
Rab7b	Ras-related protein Rab-7b	Down	Vesicles			RAB7B, member RAS oncogene family; Ras-related protein Rab-7b; Controls vesicular trafficking from endosomes to the trans-Golgi network (TGN). Acts as a negative regulator of TLR9 signaling and can suppress TLR9-triggered TNFA, IL6, and IFNB production in macrophages by promoting TLR9 lysosomal degradation. Also negatively regulates TLR4 signaling in macrophages by promoting lysosomal degradation…
Stk11ip	Serine/threonine-protein kinase 11-interacting protein	Down	Kinase			May regulate STK11/LKB1 function by controlling its subcellular localization
Snx7	Sorting nexin-7	Down	Vesicles			May be involved in several stages of intracellular trafficking
Prkch	Protein kinase C eta type, EC 2.7.11.13	Down	Membrane	Kinase		Calcium-independent, phospholipid- and diacylglycerol (DAG)-dependent serine/threonine-protein kinase that is involved in the regulation of cell differentiation in keratinocytes and pre-B cell receptor, mediates regulation of epithelial tight junction integrity and foam cell formation, and is required for glioblastoma proliferation and apoptosis prevention in MCF-7 cells.
Cadm1	Cell adhesion molecule 1	Down	Membrane		Immune	Mediates homophilic cell-cell adhesion in a Ca(2+)- independent manner. Also mediates heterophilic cell-cell adhesion with CADM3 and NECTIN3 in a Ca(2+)-independent manner. Acts as a tumor suppressor in non-small-cell lung cancer (NSCLC) cells. Interaction with CRTAM promotes natural killer (NK) cell cytotoxicity and interferon-gamma (IFN-gamma) secretion by CD8+ cells in vitro as well as NK cell…
Klra2	Killer cell lectin-like receptor 2	Up	Membrane		Immune
Ccl4	C-C motif chemokine 4	Up	Extracellular		Immune	Monokine with inflammatory and chemokinetic properties
Irak3	Interleukin-1 receptor-associated kinase 3, IRAK-3	Up	Membrane	Kinase	Immune	Inhibits dissociation of IRAK1 and IRAK4 from the Toll- like receptor signaling complex by either inhibiting the phosphorylation of IRAK1 and IRAK4 or stabilizing the receptor complex
Kdm5b	Lysine-specific demethylase 5B, EC 1.14.11.67	Up	Nucleus	Dioxygenase		Histone demethylase that demethylates 'Lys-4' of histone H3, thereby playing a central role in histone code.
Cd74	H-2 class II histocompatibility antigen gamma chain	Up	Membrane		Immune	H-2 class II histocompatibility antigen gamma chain; Plays a critical role in MHC class II antigen processing by stabilizing peptide-free class II alpha/beta heterodimers in a complex soon after their synthesis and directing transport of the complex from the endoplasmic reticulum to compartments where peptide loading of class II takes place
Dusp16	Protein-serine/threonine phosphatase, EC 3.1.3.16	Up	Multiple	Phosphatase
Ltb	Lymphotoxin-beta, LT-beta	Up	Extracellular		Immune	Cytokine that binds to LTBR/TNFRSF3. May play a specific role in immune response regulation. Provides the membrane anchor for the attachment of the heterotrimeric complex to the cell surface
Filip1l	Filamin A-interacting protein 1-like	Up	Cytoskeletal			Acts as a regulator of the antiangiogenic activity on endothelial cells. When overexpressed in endothelial cells, leads to inhibition of cell proliferation and migration and an increase in apoptosis. Inhibits melanoma growth When expressed in tumor- associated vasculature (By similarity)
Itgam	Integrin alpha-M	Up	Membrane			Integrin ITGAM/ITGB2 is implicated in various adhesive interactions of monocytes, macrophages and granulocytes as well as in mediating the uptake of complement-coated particles. It is identical with CR-3, the receptor for the iC3b fragment of the third complement component.
Endod1	Endonuclease domain-containing 1 protein, EC 3.1.30.-	Up	Extracellular	Hydrolase		May act as a DNase and a RNase
Nfil3	Nuclear factor interleukin-3-regulated protein	Up	Nucleus		Immune	Acts as a transcriptional regulator that recognizes and binds to the sequence 5'-[GA]TTA[CT]GTAA[CT]-3', a sequence present in many cellular and viral promoters. Represses transcription from promoters with activating transcription factor (ATF) sites (By similarity). Represses promoter activity in osteoblasts.
Ngly1	Peptide-N(4)-(N-acetyl-beta-glucosaminyl)asparagine amidase, PNGase, mPNGase, EC 3.5.1.52	Up	Extracellular	Hydrolase		Specifically deglycosylates the denatured form of N- linked glycoproteins in the cytoplasm and assists their proteasome-mediated degradation. Cleaves the beta-aspartyl- glucosamine (GlcNAc) of the glycan and the amide side chain of Asn, converting Asn to Asp.
Alox5	Polyunsaturated fatty acid 5-lipoxygenase, EC 1.13.11.-	Up	Multiple	Dioxygenase	Immune	Catalyzes the first step in leukotriene biosynthesis, and thereby plays a role in inflammatory processes; Belongs to the lipoxygenase family
Pou2f2	POU domain, class 2, transcription factor 2	Up	Nucleus		Immune	Transcription factor that specifically binds to the octamer motif (5'-ATTTGCAT-3'). Regulates transcription in a number of tissues in addition to activating immunoglobulin gene expression.
Prrg4	Transmembrane gamma-carboxyglutamic acid protein 4	Up	Membrane

## Sheet: Table S3
Table S3. Activation on microglia by bzATP/LPS
Combined trend	The trend is define by the predetermne diffeential gene expression thresholds. There are three label called Up, Same and Down. The threshold are define according to Methods (see Table 1 for definition).
FC	Fold change (FC) is based on the ratio of the mean (by TMM) of two experimental grops. The log base is 2. For example, down-down indicates that there is a substantial downregulation in gene expression at 3hrs relative to NT cells and at 8hrs relative to 3 hrs. All together there are 9 combined trends .
Mean values	The mean values are alculated from three independent expeiments for each group (e.g. NTI, NTII, NTIII).
NT	Non treated culture (naïve cells)
ensemblID	A unique identifier of the transcript (usually the major version of the transript)
Trend	gene_name	ensemblID	logFC (0 to 3 hours of LPS)	FDR (0 to 3 hours of LPS)	logFC (3 to 8 hours of LPS)	FDR (3 to 8 hours of LPS)	NTI	NTII	NTIII	LPS_ATP_3hI	LPS_ATP_3hII	LPS_ATP_3hIII	LPS_ATP_8hI	LPS_ATP_8hII	LPS_ATP_8hIII	Ave NT	Ave 3hr	Ave 8 hrs	Total (ATP/LPS)x3 time points
down_up	Gm6013	ENSMUSG00000110701	-3.2256	1.71e-10	-2.6602	3.6e-10	2.25777	1.67051	1.78615	0.201767	0.378312	0.0459789	0.287267	0.284113	0.321422	1.90481	0.208686	0.297601	2.41109
down_down	Gm19253	ENSMUSG00000107758	-1.65399	4.68e-06	-2.65455	5.96e-09	1.04825	2.09884	2.17234	0.55486	0.756624	0.367831	0.239389	0.355142	0.214281	1.77315	0.559772	0.269604	2.60252
down_up	Frat2	ENSMUSG00000047604	-4.05332	3.2e-10	-2.09692	8.8e-08	1.53206	2.91268	1.59305	0.151326	0.162134	0.0459789	0.526656	0.355142	0.535703	2.0126	0.119813	0.4725	2.60491
up_down	Gm37033	ENSMUSG00000104388	0.606541	0.0363568	-0.656876	0.0533443	0.725711	1.02801	0.772388	1.41237	1.18898	1.24143	0.287267	0.497198	0.749985	0.842035	1.28093	0.511483	2.63445
down_up	Lrrc14b	ENSMUSG00000021579	-2.85321	4.39e-08	-1.87014	1.45e-06	2.25777	1.37067	2.26889	0.201767	0.270223	0.321853	0.478778	0.461684	0.642844	1.96578	0.264614	0.527769	2.75816
down_down	Nexn	ENSMUSG00000039103	-1.43251	1.65e-06	-4.1625	1.24e-12	1.97555	1.79901	2.07579	0.857511	0.810668	0.505768	0.0478778	0.177571	0.0714271	1.95012	0.724649	0.0989586	2.77372
up_down	Ocstamp	ENSMUSG00000027670	4.59311	3.46e-14	0.339208	0.647896	0.0403173	0.171334	0.0965485	2.37077	2.59414	2.71276	0.0957556	0.0710283	0.214281	0.102733	2.55922	0.127022	2.78898
down_same	Necab3	ENSMUSG00000027489	-1.82187	1.06e-07	-2.27174	1.73e-09	1.81428	2.35585	1.4965	0.55486	0.702579	0.367831	0.335145	0.497198	0.321422	1.88888	0.541757	0.384588	2.81522
down_same	Srd5a1	ENSMUSG00000021594	-1.63511	1.26e-07	-1.24478	1.68e-06	1.77396	1.62768	1.59305	0.655744	0.540445	0.41381	0.670289	0.710283	0.714271	1.6649	0.536667	0.698281	2.89984
down_same	Vis1	ENSMUSG00000098320	-1.56983	1.97e-06	-1.96632	3.99e-08	2.0965	1.75618	1.64132	0.706186	0.648534	0.505768	0.574534	0.42617	0.428563	1.83133	0.620163	0.476422	2.92792
up_down	Rhob	ENSMUSG00000054364	4.18783	6.66e-12	1.63263	0.00787762	0.201586	0.0428336	0.144823	2.52209	1.99965	2.80471	0.383023	0.461684	0.392849	0.129748	2.44215	0.412519	2.98442
up_up	Gm7609	ENSMUSG00000079457	1.99468	0.000226949	3.47938	1.16e-10	0.0806346	0.257001	0.241371	0.655744	0.648534	0.965558	2.10662	1.98879	2.35709	0.193002	0.756612	2.15084	3.10045
down_up	Gm42688	ENSMUSG00000079511	-2.88567	1.49e-09	-1.19969	2.03e-05	1.57237	2.22735	2.26889	0.252209	0.216178	0.321853	0.718167	0.639255	1.21426	2.02287	0.263413	0.857228	3.14351
up_down	Gm41361	ENSMUSG00000116125	3.73769	1.1e-09	1.83895	0.00312052	0.241904	0.0428336	0.241371	2.169	2.54009	2.43688	0.478778	1.10094	0.285708	0.17537	2.38199	0.621809	3.17917
down_up	Snn	ENSMUSG00000037972	-1.73452	2.67e-07	-1.21278	8.67e-06	1.97555	1.58484	1.97924	0.453977	0.59449	0.597726	0.861801	0.781312	0.749985	1.84654	0.548731	0.797699	3.19297
down_down	2310040G24Rik	ENSMUSG00000101655	-1.07891	3.02e-05	-2.03055	2.9e-09	1.77396	1.92751	1.93097	0.907953	0.702579	1.01154	0.4309	0.390656	0.535703	1.87748	0.874023	0.45242	3.20392
up_same	Mybpc3	ENSMUSG00000002100	1.28363	7.82e-05	1.28439	4.58e-05	0.362856	0.728171	0.579291	1.00884	1.13494	1.83916	1.38846	1.52711	1.14283	0.556772	1.32764	1.3528	3.23722
down_same	Zfp541	ENSMUSG00000078796	-1.10976	5.42e-05	-1.21692	8.5e-06	1.45142	2.01318	1.64132	0.907953	0.918757	0.551747	0.909679	0.674769	0.642844	1.70197	0.792819	0.742431	3.23722
same_up	Tgm1	ENSMUSG00000022218	0.146384	0.723868	2.5336	1.83e-11	0.362856	0.428336	0.434468	0.453977	0.432356	0.459789	2.44177	2.41496	2.28567	0.408553	0.448707	2.3808	3.23806
down_same	Ube2cbp	ENSMUSG00000032415	-1.27094	8.62e-06	-1.00369	5.67e-05	1.8546	1.54201	1.6896	0.958395	0.59449	0.551747	0.861801	0.958882	0.714271	1.6954	0.701544	0.844985	3.24193
down_same	Gramd2	ENSMUSG00000074259	-1.79007	1.57e-07	-1.55435	3.33e-07	1.8546	2.31301	1.93097	0.403535	0.864713	0.505768	0.766045	0.710283	0.607131	2.03286	0.591339	0.694486	3.31868
up_same	Gm42819	ENSMUSG00000105728	0.591315	0.132572	0.193561	0.636291	1.00793	0.728171	1.06203	1.76546	1.62134	0.8736	0.478778	0.674769	1.89282	0.932712	1.42013	1.01546	3.3683
down_same	Gm47585	ENSMUSG00000114104	-0.742733	0.0158327	-0.675757	0.0190729	1.49174	1.88468	1.20686	1.00884	0.59449	1.10349	0.861801	0.603741	1.39283	1.52776	0.902274	0.95279	3.38282
down_same	Scrn2	ENSMUSG00000020877	-1.2824	2.5e-05	-0.827701	0.00094347	1.89491	1.84184	1.35168	0.756628	0.756624	0.597726	1.2927	0.958882	0.714271	1.69614	0.703659	0.988618	3.38842
up_same	Gm37940	ENSMUSG00000103899	0.539231	0.126125	0.640846	0.0554056	0.685394	1.07084	0.868936	1.05928	1.51325	1.24143	0.670289	0.994397	2.24995	0.875056	1.27132	1.30488	3.45126
same_down	Hal	ENSMUSG00000020017	-0.412362	0.104364	-1.81867	7.3e-07	1.89491	2.09884	1.20686	1.31149	1.08089	1.5173	0.670289	0.461684	0.392849	1.73354	1.30323	0.508274	3.54504
up_same	Gm43387	ENSMUSG00000104874	1.62515	1.3e-05	1.35073	0.000165049	0.564442	0.556836	0.482742	1.71502	1.18898	2.02307	1.48421	0.781312	1.89282	0.534674	1.64236	1.38611	3.56315
down_up	Irgm2	ENSMUSG00000069874	-1.19089	1.77e-05	-0.242015	0.253928	1.41111	1.84184	1.44823	0.655744	0.59449	0.781642	1.2927	1.52711	1.14283	1.56706	0.677292	1.32088	3.56523
up_same	Gm47727	ENSMUSG00000114070	1.5377	1.5e-05	1.07414	0.00157173	0.766029	0.514003	0.482742	1.81591	2.37796	1.10349	0.813923	1.20748	1.64282	0.587591	1.76579	1.22141	3.57479
down_down	Gm13373	ENSMUSG00000087196	-1.51802	1.68e-07	-2.44167	6.73e-11	2.45936	2.44151	2.12407	1.05928	0.702579	0.689684	0.383023	0.461684	0.428563	2.34164	0.817181	0.424423	3.58325
up_down	Gm11843	ENSMUSG00000082676	6.36462	3.58e-14	4.57245	6.66e-08	0.0403173	0.0428336	0	2.169	2.75627	3.40244	0.718167	0.85234	0.821412	0.027717	2.7759	0.797306	3.60093
down_down	Siglec15	ENSMUSG00000091055	-2.08296	1.31e-09	-3.35332	6.98e-13	2.62062	2.39868	3.13783	0.605302	0.540445	0.735663	0.287267	0.319627	0.178568	2.71904	0.627137	0.261821	3.608
down_same	Frg2f1	ENSMUSG00000087385	-0.81973	0.00205552	-0.804392	0.00143924	1.89491	1.58484	1.54478	1.10972	1.18898	0.597726	1.10119	0.887854	0.928553	1.67484	0.965476	0.972532	3.61285
down_down	Kcnn1	ENSMUSG00000002908	-1.84305	1.63e-09	-2.34746	1.29e-11	2.45936	2.69851	2.22061	0.907953	0.540445	0.597726	0.526656	0.42617	0.49999	2.45949	0.682042	0.484272	3.62581
same_up	Prokr1	ENSMUSG00000049409	0.418829	0.40019	2.5583	8.81e-09	0.564442	0.385502	0.33792	0.353093	0.540445	0.827621	3.06418	1.98879	2.82137	0.429288	0.57372	2.62478	3.62779
down_up	Gpr135	ENSMUSG00000043398	-2.96777	2.99e-10	-1.68149	1.14e-07	2.45936	2.01318	3.13783	0.151326	0.270223	0.505768	1.05331	0.532712	0.821412	2.53679	0.309106	0.802479	3.64837
down_down	Cd276	ENSMUSG00000035914	-1.4346	7.67e-08	-1.94416	2.67e-10	2.41904	2.39868	1.93097	0.756628	0.864713	0.8736	0.526656	0.674769	0.535703	2.24956	0.831647	0.579043	3.66025
down_same	Afmid	ENSMUSG00000017718	-1.02549	0.000903166	-0.74917	0.00579283	2.05618	1.24217	2.02752	0.504419	1.08089	1.01154	0.909679	1.10094	1.10712	1.77529	0.865615	1.03925	3.68015
down_same	Mtss2	ENSMUSG00000033763	-1.41754	5.17e-07	-1.69031	1.53e-08	1.93523	2.65568	1.97924	0.958395	0.648534	0.827621	0.766045	0.568227	0.714271	2.19005	0.811517	0.682848	3.68442
down_same	Eya4	ENSMUSG00000010461	-2.34802	1.3e-10	-2.00384	3.12e-10	2.45936	2.95552	2.26889	0.504419	0.486401	0.505768	0.718167	0.603741	0.607131	2.56125	0.498863	0.643013	3.70313
down_up	Gm44951	ENSMUSG00000108365	-1.17076	0.000159118	-0.613668	0.0139526	1.69333	1.71334	1.93097	0.857511	0.702579	0.781642	1.10119	0.710283	1.64282	1.77921	0.780577	1.15143	3.71122
up_up	Ntng2	ENSMUSG00000035513	6.70106	9.37e-07	9.31592	1.51e-14	0	0	0	0.605302	0.648534	0.321853	3.11206	3.05422	3.39279	0	0.52523	3.18635	3.71158
down_up	Cd46	ENSMUSG00000016493	-0.533986	0.033752	-0.0146579	0.949879	1.29015	1.49917	1.35168	0.706186	1.08089	1.05752	1.62785	1.243	1.28569	1.38034	0.948197	1.38551	3.71404
up_same	Arnt2	ENSMUSG00000015709	3.07654	4.22e-10	3.11763	1.41e-10	0.120952	0.257001	0.241371	1.81591	1.78347	1.65524	1.2927	2.09534	1.89282	0.206441	1.75154	1.76029	3.71827
down_same	2810429I04Rik	ENSMUSG00000097709	-1.72178	6.51e-08	-1.80157	1.1e-08	2.3384	2.05601	2.60681	0.706186	0.864713	0.551747	0.861801	0.781312	0.392849	2.33374	0.707549	0.678654	3.71994
down_same	Gm42600	ENSMUSG00000107278	-1.13359	7.42e-05	-1.39123	3.18e-06	1.97555	1.62768	2.51026	0.958395	0.864713	0.919579	0.861801	0.781312	0.678558	2.03783	0.914229	0.77389	3.72595
down_up	Gm36266	ENSMUSG00000106617	-1.73859	2.05e-06	-0.0975014	0.666666	2.13682	1.67051	1.15858	0.453977	0.59449	0.459789	1.57997	1.42057	1.71425	1.6553	0.502752	1.5716	3.72965
down_up	Gm13391	ENSMUSG00000086109	-2.12715	7.54e-09	-1.4276	4.93e-07	2.70126	2.39868	1.8827	0.706186	0.540445	0.367831	0.861801	1.02991	0.714271	2.32754	0.538154	0.868661	3.73436
down_up	C130036L24Rik	ENSMUSG00000073627	-1.21273	5.26e-05	-0.291818	0.181769	1.37079	2.01318	1.64132	0.706186	0.864713	0.597726	1.14907	1.49159	1.39283	1.6751	0.722875	1.3445	3.74247
down_up	A930014D07Rik	ENSMUSG00000114414	-1.41115	4.14e-06	-0.726133	0.0017985	2.01586	2.14168	1.54478	0.706186	0.378312	1.01154	1.05331	1.31402	1.07141	1.90077	0.698678	1.14625	3.7457
up_down	Gm45266	ENSMUSG00000109719	3.76085	4.65e-12	1.86462	0.000253639	0.201586	0.214168	0.193097	2.52209	2.64818	3.21853	0.718167	0.532712	0.99998	0.20295	2.79627	0.750286	3.7495
down_same	Gm6525	ENSMUSG00000104043	-1.58928	3.85e-08	-1.15657	1.13e-06	2.25777	2.05601	2.02752	0.706186	0.810668	0.597726	0.766045	0.958882	1.07141	2.11377	0.70486	0.932111	3.75074
up_down	Plekha4	ENSMUSG00000040428	2.4524	7.61e-11	0.985041	0.00294735	0.483808	0.385502	0.482742	2.169	2.59414	2.66678	0.670289	0.994397	0.964266	0.450684	2.47664	0.876317	3.80364
down_same	Card11	ENSMUSG00000036526	-1.35932	1.5e-06	-1.46111	2.12e-07	2.17713	2.65568	1.6896	0.80707	0.810668	0.919579	0.813923	0.781312	0.785698	2.17414	0.845772	0.793644	3.81355
up_down	Gm2774	ENSMUSG00000111148	6.38262	2.2e-14	4.76944	1.12e-08	0.0403173	0.0428336	0	3.12739	2.64818	2.71276	1.38846	0.887854	0.607131	0.027717	2.82944	0.961147	3.81831
down_up	Tmem218	ENSMUSG00000032121	-2.54448	9.47e-11	-0.887595	4.37e-05	2.29809	2.52718	1.93097	0.504419	0.486401	0.183916	1.24482	1.20748	1.21426	2.25208	0.391578	1.22219	3.86585
down_same	Dnmt3b	ENSMUSG00000027478	-0.525178	0.0470643	-0.493636	0.0485275	1.8546	1.28501	1.6896	0.857511	1.40516	1.10349	1.05331	0.887854	1.46426	1.60973	1.12205	1.13514	3.86693
down_down	Gm13963	ENSMUSG00000085448	-1.08273	3.03e-05	-1.5911	9.05e-08	2.70126	1.71334	2.02752	1.05928	1.13494	0.8736	0.574534	0.781312	0.749985	2.14737	1.0226	0.701943	3.87192
down_up	3830408C21Rik	ENSMUSG00000071181	-1.4933	1.06e-06	-0.907229	0.000151766	2.13682	2.31301	1.73787	0.453977	0.648534	1.05752	1.05331	1.17197	1.07141	2.06257	0.720009	1.0989	3.88147
down_up	2900052L18Rik	ENSMUSG00000043993	-2.51216	4.85e-10	-1.85413	7.81e-09	2.62062	2.09884	3.42747	0.403535	0.432356	0.551747	0.526656	0.958882	0.678558	2.71565	0.462546	0.721365	3.89956
up_same	Ttn	ENSMUSG00000051747	1.42077	4.64e-05	1.32757	8.19e-05	0.604759	0.985172	0.289645	1.5637	1.56729	1.97709	1.43633	1.42057	1.92853	0.626526	1.70269	1.59514	3.92436
down_up	Wdr66	ENSMUSG00000029442	-0.843305	0.00207686	0.502365	0.0134631	1.33047	1.28501	1.35168	0.706186	0.756624	0.735663	2.34601	1.66917	1.71425	1.32239	0.732824	1.90981	3.96502
same_up	Gm41611	ENSMUSG00000117079	0.0967251	0.780393	1.44453	2.88e-06	0.927298	0.942339	0.579291	1.00884	1.18898	0.505768	2.20238	2.91216	1.64282	0.816309	0.901195	2.25245	3.96996
same_same	4732496C06Rik	ENSMUSG00000108456	-0.25404	0.255746	-0.424736	0.0490426	1.49174	1.92751	1.20686	1.36193	1.18898	1.33339	0.957556	1.20748	1.24997	1.54204	1.29477	1.13834	3.97514
up_same	Gm37334	ENSMUSG00000104525	0.896202	0.0197469	0.748192	0.0455574	0.846663	0.985172	0.820662	2.01767	1.67538	1.28741	0.766045	1.17197	2.35709	0.884166	1.66015	1.4317	3.97602
same_up	B430319F04Rik	ENSMUSG00000110062	0.338552	0.275746	1.2486	2e-05	0.846663	1.07084	0.627565	1.05928	0.864713	1.28741	2.34601	2.13085	1.71425	0.848356	1.07047	2.0637	3.98253
down_same	Pcdhb16	ENSMUSG00000047910	-0.956019	0.0013248	-0.884516	0.00145614	1.53206	2.27018	2.07579	0.907953	0.918757	1.14947	0.957556	1.17197	0.99998	1.95934	0.992061	1.04317	3.99457
down_same	9630013D21Rik	ENSMUSG00000059027	-1.84996	4.21e-09	-1.93528	6.23e-10	2.66094	2.39868	2.75163	0.857511	0.540445	0.735663	0.813923	0.603741	0.642844	2.60375	0.711207	0.686836	4.00179
down_same	Scara3	ENSMUSG00000034463	-1.51845	4.42e-07	-1.08456	1.22e-05	1.81428	2.27018	2.60681	0.504419	1.02685	0.781642	0.861801	1.02991	1.17855	2.23042	0.770969	1.02342	4.02481
down_up	Akap3	ENSMUSG00000030344	-0.83255	0.00662442	0.992836	2.78e-05	1.04825	0.899505	1.4965	0.605302	0.648534	0.643705	2.1545	2.30842	2.28567	1.14809	0.632514	2.24953	4.03013
down_up	Zfp174	ENSMUSG00000054939	-0.875248	0.00162015	-0.0829586	0.711199	1.81428	1.24217	1.83442	0.756628	0.918757	0.965558	1.96299	1.59814	1.14283	1.63029	0.880314	1.56799	4.07859
up_down	Gbp7	ENSMUSG00000040253	2.75666	2.28e-10	2.09396	2.61e-07	0.201586	0.299835	0.531017	1.86635	2.70223	2.29895	1.53209	1.243	1.5714	0.344146	2.28917	1.44883	4.08215
down_up	Paupar	ENSMUSG00000102424	-2.78295	2.05e-10	-1.08012	1.44e-05	2.37872	2.69851	2.60681	0.504419	0.216178	0.367831	0.670289	1.45608	1.35712	2.56135	0.362809	1.16116	4.08532
down_up	Prob1	ENSMUSG00000073600	-1.79102	4.99e-08	-0.456399	0.02164	1.89491	1.92751	2.31716	0.655744	0.59449	0.505768	1.38846	1.31402	1.71425	2.04653	0.585334	1.47224	4.10411
up_up	Gm16754	ENSMUSG00000097439	1.02707	0.000495838	1.94923	6.95e-10	0.645077	0.471169	0.675839	1.41237	1.24302	1.01154	2.39389	2.05982	2.49995	0.597362	1.22231	2.31789	4.13756
same_same	Gm37238	ENSMUSG00000103373	0.00976726	0.97573	-0.351407	0.271135	1.97555	1.49917	0.965485	1.5637	1.56729	1.42535	0.861801	0.674769	1.92853	1.48007	1.51878	1.15503	4.15388
down_same	Ttc30a1	ENSMUSG00000075271	-1.11041	2.23e-05	-1.53807	1.4e-07	2.05618	1.97034	2.993	1.05928	0.918757	1.19545	0.766045	0.781312	0.821412	2.33984	1.05783	0.78959	4.18726
down_same	Asrgl1	ENSMUSG00000024654	-1.12003	4.07e-05	-1.16392	1.18e-05	2.62062	2.48435	1.44823	0.958395	1.13494	0.965558	0.957556	0.85234	1.14283	2.1844	1.01963	0.984243	4.18827
down_down	D5Ertd605e	ENSMUSG00000106820	-0.680038	0.00285951	-1.82601	1.78e-08	1.97555	2.35585	2.36544	1.71502	1.24302	1.19545	0.383023	0.674769	0.749985	2.23228	1.3845	0.602592	4.21937
down_up	Gm41442	ENSMUSG00000116946	-1.23555	1.76e-05	-0.0940111	0.641792	1.97555	1.84184	1.59305	0.907953	0.648534	0.735663	1.19695	1.81122	1.96425	1.80348	0.76405	1.65747	4.225
up_up	Xrra1	ENSMUSG00000035211	0.951825	0.00288861	2.00748	2.31e-09	0.564442	0.59967	0.675839	1.05928	1.08089	1.37937	2.29814	2.37945	2.67852	0.613317	1.17318	2.45203	4.23853
down_same	Gm16675	ENSMUSG00000097534	-1.32427	4.89e-06	-0.956676	9.06e-05	1.77396	2.61285	2.31716	0.55486	1.18898	0.919579	0.957556	1.13645	1.28569	2.23466	0.887806	1.12657	4.24903
down_same	Acy3	ENSMUSG00000024866	-0.562663	0.0152991	-1.03339	6.64e-05	2.01586	2.09884	1.78615	1.5637	1.18898	1.24143	1.10119	1.06542	0.749985	1.96695	1.33137	0.9722	4.27052
down_up	Cela1	ENSMUSG00000023031	-0.998039	0.00027084	-0.350059	0.104444	2.0965	1.67051	1.83442	0.958395	1.29707	0.597726	1.43633	1.52711	1.42854	1.86714	0.951063	1.464	4.2822
down_up	Zfp940	ENSMUSG00000050855	-1.14563	8.31e-05	-0.123417	0.563396	2.05618	1.75618	1.59305	0.706186	0.540445	1.14947	2.01087	1.56262	1.49997	1.8018	0.798702	1.69115	4.29166
down_down	Fmo5	ENSMUSG00000028088	-1.15926	1.11e-06	-1.98799	1.33e-10	2.58031	2.65568	2.36544	0.958395	1.18898	1.24143	0.622412	0.710283	0.571417	2.53381	1.1296	0.634704	4.29811
down_up	Dsp	ENSMUSG00000054889	-2.66021	2.4e-11	-1.55507	1.3e-08	2.78189	3.04118	2.79991	0.756628	0.270223	0.321853	1.14907	0.923368	0.892839	2.87433	0.449568	0.988425	4.31232
down_same	Oas1c	ENSMUSG00000001166	-1.27671	6.32e-07	-1.22943	3.95e-07	2.05618	2.69851	2.31716	0.907953	1.13494	0.8736	1.00543	1.02991	0.964266	2.35729	0.972163	0.99987	4.32932
down_up	4933439K11Rik	ENSMUSG00000085184	-2.20617	7.88e-09	-0.447694	0.0303051	2.25777	2.14168	2.36544	0.756628	0.216178	0.459789	1.43633	1.84674	1.60711	2.25496	0.477532	1.63006	4.36255
same_same	2610020C07Rik	ENSMUSG00000097537	-0.437426	0.0774745	-0.516886	0.0319719	1.53206	1.79901	2.07579	1.41237	1.24302	1.28741	1.24482	1.17197	1.3214	1.80229	1.31427	1.24606	4.36262
down_up	Gm44168	ENSMUSG00000108049	-1.19568	0.000128882	-0.51683	0.0336644	2.17713	2.05601	1.83442	0.353093	1.13494	1.14947	1.96299	1.42057	0.99998	2.02252	0.879167	1.46118	4.36287
down_up	Vsig10	ENSMUSG00000066894	-2.6788	2.81e-11	-1.06662	3.22e-06	2.70126	3.25535	2.07579	0.453977	0.432356	0.367831	1.14907	1.243	1.42854	2.67747	0.418055	1.27354	4.36906
down_same	Gm37589	ENSMUSG00000104235	-1.15945	0.00026515	-1.3084	3.9e-05	1.8546	2.22735	3.08955	0.706186	1.4592	1.01154	0.766045	0.745797	1.28569	2.3905	1.05897	0.93251	4.38198
same_same	Gm37677	ENSMUSG00000103976	0.120542	0.656593	0.16221	0.530203	1.24984	1.24217	1.6896	1.31149	1.13494	1.97709	1.24482	1.243	2.07139	1.39387	1.47451	1.51974	4.38811
same_down	Khk	ENSMUSG00000029162	-0.426838	0.0704295	-2.15721	2.02e-08	2.17713	2.14168	2.36544	1.71502	1.4592	1.7472	0.813923	0.568227	0.178568	2.22808	1.64047	0.520239	4.3888
down_same	Hsf4	ENSMUSG00000033249	-0.882337	0.000125034	-0.608314	0.00220231	2.17713	1.84184	1.97924	0.857511	1.13494	1.24143	1.34058	1.42057	1.17855	1.99941	1.07796	1.31323	4.3906
down_same	Mypop	ENSMUSG00000048481	-1.32113	5.49e-07	-1.4134	7.65e-08	2.58031	2.44151	2.36544	0.857511	1.13494	0.965558	1.19695	0.639255	0.99998	2.46242	0.986001	0.945393	4.39381
same_same	Myl6b	ENSMUSG00000039824	-0.276057	0.246447	-0.56945	0.0191229	1.29015	2.09884	1.93097	1.36193	1.13494	1.79318	1.34058	0.994397	1.24997	1.77332	1.43001	1.19498	4.39832
down_up	Slc25a35	ENSMUSG00000018740	-1.5189	6.21e-07	-0.869531	0.000188358	2.53999	2.14168	2.36544	0.706186	0.702579	1.01154	0.957556	1.56262	1.24997	2.34904	0.806767	1.25672	4.41252
up_down	Dpep3	ENSMUSG00000031898	4.0459	1.88e-15	1.93662	9.62e-06	0.120952	0.214168	0.289645	3.12739	3.35076	3.77027	0.766045	0.85234	0.749985	0.208255	3.41614	0.789457	4.41385
up_same	Gm7204	ENSMUSG00000048164	1.25097	4.68e-05	1.33167	9.19e-06	0.524125	0.856671	0.868936	1.41237	2.37796	1.56328	2.05875	1.95328	1.64282	0.749911	1.78454	1.88495	4.4194
down_up	Kbtbd3	ENSMUSG00000025893	-1.57851	2.46e-06	-0.72052	0.0030262	1.73364	2.27018	2.84818	0.756628	0.864713	0.643705	1.62785	1.31402	1.21426	2.284	0.755015	1.38538	4.42439
down_same	Zfp808	ENSMUSG00000074867	-1.33435	2.77e-05	-0.853896	0.00106881	2.05618	2.48435	2.31716	0.958395	0.918757	0.827621	1.00543	1.52711	1.17855	2.2859	0.901591	1.23703	4.42452
down_same	Ttc41	ENSMUSG00000044937	-0.696238	0.00614827	-0.728311	0.00293972	1.61269	2.57001	1.83442	0.958395	1.40516	1.33339	1.00543	1.20748	1.35712	2.00571	1.23231	1.19001	4.42803
same_same	Egf	ENSMUSG00000028017	0.263188	0.287329	0.253966	0.286665	1.24984	1.37067	1.3034	1.36193	1.99965	1.37937	1.57997	1.20748	1.89282	1.30797	1.58032	1.56009	4.44838
down_up	AV356131	ENSMUSG00000108461	-0.857956	0.000684998	0.0412991	0.835411	1.49174	1.88468	1.83442	0.857511	1.13494	0.8736	1.53209	1.59814	2.14281	1.73695	0.955349	1.75768	4.44998
down_same	4930522L14Rik	ENSMUSG00000072762	-1.01672	0.000491139	-0.582933	0.0169437	1.89491	1.58484	2.79991	0.655744	1.02685	1.33339	1.14907	1.70468	1.21426	2.09322	1.00533	1.356	4.45455
same_same	9530056E24Rik	ENSMUSG00000115955	-0.332697	0.257028	-0.0395513	0.886562	1.93523	1.58484	1.35168	0.756628	1.35111	1.7472	1.00543	1.77571	1.85711	1.62392	1.28498	1.54608	4.45498
same_same	Gm50107	ENSMUSG00000118239	-0.0675186	0.780595	-0.294385	0.212427	1.8546	1.75618	1.15858	1.66458	1.99965	1.01154	1.2927	1.10094	1.53568	1.58978	1.55859	1.30977	4.45815
up_down	Gm22748	ENSMUSG00000064427	4.85607	7.9e-16	3.64076	8.25e-11	0.0806346	0.128501	0.0965485	2.72386	2.64818	3.77027	1.34058	1.20748	1.42854	0.101895	3.04744	1.32553	4.47487
down_up	Rin1	ENSMUSG00000024883	-1.24587	4.57e-05	-0.480078	0.0370245	2.25777	2.14168	1.8827	1.05928	0.810668	0.781642	1.53209	1.02991	1.96425	2.09405	0.883863	1.50875	4.48666
same_up	Klf8	ENSMUSG00000041649	-0.348588	0.204012	1.0007	2.75e-05	1.00793	1.19934	1.39995	1.00884	0.810668	0.965558	2.05875	2.30842	2.71423	1.20241	0.928354	2.36047	4.49123
down_down	Gm16001	ENSMUSG00000085433	-0.580915	0.00344253	-1.19497	7.42e-07	2.25777	2.14168	2.02752	1.41237	1.24302	1.60926	0.957556	0.85234	0.99998	2.14232	1.42155	0.936625	4.5005
same_down	Il27ra	ENSMUSG00000005465	-0.357298	0.0776163	-1.00817	2.88e-05	2.05618	1.75618	2.17234	1.31149	1.72943	1.60926	0.718167	1.06542	1.10712	1.9949	1.55006	0.963571	4.50853
down_up	D130017N08Rik	ENSMUSG00000097287	-1.99637	1.6e-09	-1.0335	5.2e-06	2.82221	2.82702	2.12407	0.605302	0.648534	0.689684	1.24482	1.10094	1.46426	2.5911	0.64784	1.27001	4.50894
down_same	Spef1	ENSMUSG00000027329	-0.806232	0.00200253	-0.555487	0.0159979	2.13682	1.67051	2.17234	1.05928	1.62134	0.781642	1.53209	1.34954	1.21426	1.99322	1.15409	1.3653	4.5126
down_up	Slc25a42	ENSMUSG00000002346	-2.34922	3.94e-11	-0.959323	4.95e-06	2.74158	2.69851	2.51026	0.55486	0.486401	0.505768	1.24482	1.45608	1.35712	2.65012	0.515676	1.35267	4.51847
down_same	Gm14305	ENSMUSG00000078878	-0.849397	0.000433323	-0.498622	0.0149083	1.73364	2.39868	1.93097	1.00884	1.18898	1.14947	0.957556	1.42057	1.78568	2.0211	1.11576	1.38793	4.52479
down_up	Gm10642	ENSMUSG00000074213	-2.42011	1.03e-10	-1.20388	6.26e-07	2.45936	2.74135	3.23437	0.655744	0.324267	0.551747	1.19695	1.243	1.17855	2.81169	0.510586	1.20616	4.52844
up_down	Klhdc8b	ENSMUSG00000032609	1.90443	8.62e-09	0.909198	0.00223178	0.604759	0.642504	0.820662	2.7743	2.26987	2.6208	1.2927	1.49159	1.07141	0.689308	2.55499	1.28523	4.52953
up_down	Fam167a	ENSMUSG00000035095	1.85453	1.85e-08	0.791371	0.00806386	0.685394	0.771004	0.675839	2.52209	2.48605	2.71276	1.38846	0.923368	1.42854	0.710746	2.57363	1.24679	4.53117
up_down	Gpr4	ENSMUSG00000044317	3.70485	4.48e-14	1.71559	6.35e-05	0.161269	0.428336	0.193097	3.32916	3.08054	3.90821	0.622412	1.02991	0.892839	0.260901	3.4393	0.848387	4.54859
up_down	Gm24298	ENSMUSG00000088924	1.64026	3.14e-07	0.699032	0.0189121	0.927298	0.813838	0.579291	2.72386	2.48605	2.16101	1.81936	0.887854	1.24997	0.773475	2.45697	1.31906	4.54951
down_same	N4bp3	ENSMUSG00000001053	-0.537777	0.0143691	-0.880731	0.000187563	2.3384	2.01318	1.78615	1.31149	1.24302	1.65524	0.957556	1.45608	0.892839	2.04591	1.40325	1.10216	4.55132
down_same	Gm8066	ENSMUSG00000106237	-0.608395	0.0157659	-0.112953	0.608134	1.41111	1.92751	1.97924	0.907953	1.24302	1.28741	1.81936	1.74019	1.35712	1.77262	1.14613	1.63889	4.55764
up_same	Ankrd37	ENSMUSG00000050914	0.547276	0.0175639	0.884127	7.3e-05	1.00793	0.942339	1.25513	1.46281	1.51325	1.65524	1.81936	2.16636	1.85711	1.06847	1.54377	1.94761	4.55984
down_up	Gm20632	ENSMUSG00000093577	-1.1165	1.22e-05	0.0740167	0.702834	1.89491	1.67051	1.8827	0.907953	0.810668	0.781642	2.05875	2.16636	1.53568	1.81604	0.833421	1.92026	4.56972
down_up	Armc2	ENSMUSG00000071324	-2.04454	5.37e-10	-0.589344	0.00141746	2.3384	2.61285	2.31716	0.706186	0.378312	0.643705	1.34058	1.52711	1.89282	2.4228	0.576068	1.58684	4.58571
same_down	Gm4610	ENSMUSG00000104554	-0.0398081	0.85778	-1.09025	6.84e-05	1.93523	2.05601	1.64132	1.46281	1.99965	2.02307	0.909679	1.243	0.49999	1.87752	1.82851	0.884221	4.59025
down_up	Gm19385	ENSMUSG00000110730	-2.02031	2.49e-09	-1.34979	2.32e-07	2.17713	3.08402	3.1861	0.605302	0.648534	0.781642	1.19695	1.17197	0.928553	2.81575	0.678493	1.09916	4.5934
same_same	Gm45718	ENSMUSG00000109390	-0.0802167	0.732252	-0.22375	0.324071	1.45142	1.97034	1.4965	1.71502	1.35111	1.56328	1.62785	1.27851	1.35712	1.63942	1.54314	1.42116	4.60372
up_same	Gm37914	ENSMUSG00000103272	1.11678	0.000106249	1.27629	6.71e-06	0.685394	0.771004	1.06203	1.61414	1.62134	2.11503	1.77148	1.59814	2.60709	0.839477	1.7835	1.99224	4.61521
down_same	BC037704	ENSMUSG00000117698	-0.634718	0.00924092	-0.734864	0.00220268	1.93523	2.39868	1.8827	1.5637	1.35111	1.10349	0.766045	1.49159	1.35712	2.0722	1.33944	1.20492	4.61656
up_same	G530011O06Rik	ENSMUSG00000072844	1.63155	1.27e-06	1.54	2.28e-06	0.362856	0.771004	0.868936	2.21944	1.99965	1.88514	2.01087	1.81122	1.92853	0.667599	2.03474	1.91687	4.61921
down_up	A230056P14Rik	ENSMUSG00000087178	-0.808116	0.000648624	-0.171026	0.376536	1.65301	1.97034	2.02752	1.31149	0.918757	0.965558	1.77148	1.49159	1.74996	1.88362	1.06527	1.67101	4.6199
down_same	Gm20667	ENSMUSG00000093726	-1.81537	1.35e-08	-1.79863	4.61e-09	2.78189	2.74135	3.3792	0.504419	1.08089	0.919579	0.718167	0.887854	0.892839	2.96748	0.834963	0.832953	4.6354
down_same	Gm37694	ENSMUSG00000102562	-0.860013	0.000909291	-0.455183	0.037206	1.8546	2.18451	2.07579	1.66458	0.702579	0.965558	1.57997	1.59814	1.28569	2.0383	1.11091	1.48793	4.63714
down_up	Stk19-ps1	ENSMUSG00000092202	-0.729171	0.00365538	-0.0497453	0.813044	1.73364	1.41351	2.31716	1.46281	0.972802	0.827621	1.62785	1.88225	1.67854	1.82144	1.08775	1.72954	4.63873
down_same	Tcam1	ENSMUSG00000020712	-1.43886	1.53e-07	-1.01408	6.47e-06	2.49967	2.48435	2.51026	0.80707	1.13494	0.827621	1.14907	1.06542	1.46426	2.49809	0.923209	1.22625	4.64755
down_up	Shpk	ENSMUSG00000005951	-1.94118	8.16e-08	-0.964546	0.000138075	2.90285	2.57001	2.41371	0.706186	0.59449	0.735663	1.2927	1.243	1.49997	2.62886	0.67878	1.34522	4.65286
down_same	Dact3	ENSMUSG00000078794	-2.49994	2.56e-12	-2.16012	5.1e-12	3.06411	3.34102	3.62057	0.655744	0.486401	0.597726	0.670289	0.745797	0.785698	3.3419	0.579957	0.733928	4.65579
up_down	Spns2	ENSMUSG00000040447	2.84812	1.15e-12	0.241933	0.518246	0.403173	0.471169	0.627565	3.93446	3.18863	3.58636	0.670289	0.319627	0.785698	0.500636	3.56982	0.591872	4.66232
down_up	Lncppara	ENSMUSG00000116305	-1.23292	4.29e-05	-0.71285	0.00340122	2.82221	2.09884	1.97924	1.26105	0.918757	0.781642	0.957556	1.38505	1.78568	2.3001	0.987148	1.3761	4.66334
down_same	Pla2g4c	ENSMUSG00000033847	-1.98515	9.06e-09	-1.66846	3.08e-08	3.38665	3.08402	2.41371	0.655744	0.864713	0.735663	1.2927	0.745797	0.857125	2.96146	0.75204	0.965208	4.67871
same_same	Gm17655	ENSMUSG00000090963	-0.225212	0.343354	-0.48017	0.0442651	1.81428	1.71334	1.93097	1.41237	1.72943	1.5173	1.43633	1.02991	1.46426	1.81953	1.55303	1.31017	4.68273
down_same	Gm9776	ENSMUSG00000042857	-1.03043	4.48e-06	-1.1312	5.08e-07	2.45936	2.39868	2.41371	1.26105	0.972802	1.28741	1.05331	1.243	0.99998	2.42392	1.17375	1.09876	4.69643
up_same	Gpr85	ENSMUSG00000048216	3.22835	4.51e-12	3.26303	1.61e-12	0.161269	0.385502	0.144823	2.37077	2.05369	2.20699	2.20238	2.52151	2.07139	0.230531	2.21048	2.26509	4.7061
same_up	Ptger1	ENSMUSG00000019464	-0.00777817	0.974389	0.712127	0.000858841	1.49174	1.15651	1.20686	1.00884	1.4592	1.37937	2.39389	2.34393	1.67854	1.28503	1.28247	2.13879	4.70629
up_down	Gm26674	ENSMUSG00000097597	2.16672	5.76e-11	0.883957	0.00170914	0.604759	0.642504	0.675839	2.42121	3.02649	3.17255	1.43633	1.13645	1.03569	0.641034	2.87342	1.20283	4.71728
up_down	Gm49482	ENSMUSG00000116308	3.378	2.97e-15	1.0761	0.00190321	0.403173	0.214168	0.434468	3.3796	3.67503	3.90821	0.622412	0.958882	0.607131	0.350603	3.65428	0.729475	4.73436
down_same	Gm15853	ENSMUSG00000103400	-0.630543	0.00486401	-0.690293	0.0015569	2.3384	1.97034	2.02752	1.36193	0.810668	1.83916	1.10119	1.31402	1.46426	2.11209	1.33725	1.29316	4.7425
down_same	Zfp524	ENSMUSG00000051184	-0.969714	0.000263904	-0.4841	0.0258689	2.41904	2.31301	1.6896	0.857511	1.24302	1.19545	1.10119	1.59814	1.82139	2.14055	1.09866	1.50691	4.74612
up_down	Gm26885	ENSMUSG00000097125	2.77833	7.81e-11	2.04776	2.29e-07	0.241904	0.385502	0.579291	2.47165	2.86436	2.80471	1.67572	2.13085	1.10712	0.402232	2.71358	1.6379	4.75371
down_up	Bco2	ENSMUSG00000032066	-2.20783	9.13e-11	-0.91049	9.61e-06	2.45936	2.86985	2.84818	0.403535	0.648534	0.689684	1.53209	1.34954	1.46426	2.72579	0.580584	1.44863	4.75501
same_same	Gm19721	ENSMUSG00000102324	0.278426	0.278625	0.561176	0.0193902	1.24984	1.28501	1.35168	1.46281	1.62134	1.60926	1.77148	1.59814	2.32138	1.29551	1.56447	1.897	4.75698
same_down	Macrod1	ENSMUSG00000036278	0.109508	0.574289	-1.17707	3.37e-06	2.05618	1.67051	1.93097	1.96723	2.32392	1.83916	0.957556	0.745797	0.821412	1.88589	2.04343	0.841589	4.77091
same_down	1700003F12Rik	ENSMUSG00000038523	-0.412613	0.0518751	-1.51098	2.98e-07	1.69333	2.48435	2.70336	1.5637	1.78347	1.7472	0.670289	0.781312	0.892839	2.29368	1.69812	0.78148	4.77328
up_down	Gm5909	ENSMUSG00000082491	1.15723	4.97e-06	0.18035	0.463424	0.967615	1.02801	1.3034	2.21944	2.432	2.6208	1.43633	1.31402	0.99998	1.09968	2.42408	1.25011	4.77387
same_same	Gm18860	ENSMUSG00000110569	-0.337928	0.105738	-0.206609	0.293216	1.69333	2.18451	1.54478	1.36193	1.24302	1.65524	1.48421	1.63365	1.5714	1.80754	1.42007	1.56309	4.79069
down_up	Klhl33	ENSMUSG00000090799	-3.83344	1.57e-13	-1.50386	1.05e-08	2.90285	4.15486	3.13783	0.252209	0.378312	0.0919579	1.05331	1.20748	1.28569	3.39851	0.240826	1.18216	4.8215
down_up	Slc4a3	ENSMUSG00000006576	-0.694866	0.0155752	0.860905	0.00016176	1.8546	1.07084	1.25513	0.706186	0.918757	0.965558	2.68116	2.48599	2.53566	1.39352	0.8635	2.5676	4.82463
same_down	Bbs9	ENSMUSG00000035919	-0.326492	0.147523	-1.25473	1.2e-05	2.25777	2.05601	2.22061	2.47165	1.40516	1.33339	1.00543	0.994397	0.749985	2.17813	1.73673	0.916605	4.83147
up_same	Gm29367	ENSMUSG00000100396	2.0721	2.58e-08	2.14787	5.02e-09	0.483808	0.642504	0.386194	2.169	2.16178	2.11503	1.57997	2.66356	2.39281	0.504168	2.1486	2.21211	4.86489
same_same	1700007L15Rik	ENSMUSG00000097318	-0.0107719	0.96575	-0.260431	0.283644	1.1692	2.18451	1.83442	1.41237	1.67538	1.97709	1.67572	1.243	1.42854	1.72938	1.68828	1.44909	4.86675
down_up	Mfsd9	ENSMUSG00000041945	-1.1654	7.7e-06	0.00057142	0.997693	2.01586	2.01318	1.93097	0.706186	0.702579	1.19545	2.29814	2.09534	1.64282	1.98667	0.868072	2.0121	4.86684
same_same	Rn7sk	ENSMUSG00000065037	-0.20384	0.418271	-0.0321464	0.89479	2.01586	1.45634	1.64132	1.71502	1.89156	0.919579	1.43633	1.81122	1.71425	1.70451	1.50872	1.65394	4.86717
up_down	Gm23134	ENSMUSG00000077990	2.13613	7.44e-11	1.54371	1.93e-07	0.564442	0.556836	0.627565	2.26988	2.86436	2.57482	1.86723	1.49159	1.78568	0.582948	2.56969	1.71484	4.86747
down_up	Ttc38	ENSMUSG00000035944	-1.7994	1.52e-09	-0.786767	5.17e-05	2.82221	2.86985	2.12407	0.756628	0.702579	0.781642	1.48421	1.34954	1.71425	2.60538	0.74695	1.516	4.86833
down_same	Cdon	ENSMUSG00000038119	-0.776465	0.00587331	-0.407024	0.0957598	2.58031	2.05601	1.64132	1.2106	0.972802	1.47133	1.14907	1.45608	2.07139	2.09255	1.21824	1.55884	4.86964
same_same	Clba1	ENSMUSG00000037594	0.0343501	0.873536	-0.33741	0.117249	1.81428	1.92751	1.39995	1.51326	1.89156	1.88514	1.7236	1.02991	1.42854	1.71391	1.76332	1.39402	4.87125
down_same	Gemin8	ENSMUSG00000040621	-0.623228	0.00610894	-0.418544	0.0401384	1.73364	2.31301	2.07579	1.10972	1.4592	1.37937	1.48421	1.49159	1.5714	2.04082	1.3161	1.51573	4.87265
down_same	Zfp455	ENSMUSG00000051037	-0.852034	0.000176132	-0.883068	6.09e-05	2.58031	2.01318	2.46199	1.31149	0.918757	1.60926	1.19695	1.27851	1.3214	2.35182	1.27984	1.26562	4.89728
same_down	Gm48529	ENSMUSG00000111521	-0.0767171	0.695967	-0.881276	0.000142669	2.17713	1.92751	1.83442	2.01767	1.67538	1.93112	0.718167	1.06542	1.35712	1.97969	1.87472	1.0469	4.90131
down_up	Cbarp	ENSMUSG00000035640	-1.36988	2.85e-07	-0.26825	0.132121	2.13682	2.09884	2.41371	0.655744	1.02685	0.8736	1.86723	1.81122	1.82139	2.21646	0.852063	1.83328	4.9018
same_same	Dbn1	ENSMUSG00000034675	0.000968698	0.996987	0.153179	0.479559	1.53206	1.84184	1.3034	1.46281	1.67538	1.56328	2.25026	1.45608	1.64282	1.5591	1.56716	1.78305	4.90932
up_down	Gm14221	ENSMUSG00000078956	1.95221	1.11e-09	0.361106	0.212743	1.12888	0.556836	0.675839	3.12739	2.97245	3.17255	1.10119	1.20748	0.785698	0.787187	3.0908	1.03146	4.90944
up_same	Fpr2	ENSMUSG00000052270	1.38474	2.51e-05	1.49616	3.42e-06	0.766029	0.685337	0.868936	1.96723	1.62134	2.3909	1.77148	2.02431	2.6428	0.773434	1.99316	2.1462	4.91279
down_same	Rfx2	ENSMUSG00000024206	-0.860707	0.000118273	-0.859071	6.04e-05	2.21745	2.52718	2.26889	1.2106	1.40516	1.24143	1.34058	1.31402	1.21426	2.33784	1.28573	1.28962	4.91319
down_up	Lyrm7	ENSMUSG00000020268	-1.58979	3.25e-08	-0.952649	1.27e-05	2.53999	2.99835	2.46199	0.706186	0.756624	1.14947	1.48421	1.31402	1.35712	2.66678	0.870761	1.38512	4.92265
same_up	Gm15417	ENSMUSG00000074466	0.241144	0.429421	1.55685	1.43e-07	0.524125	1.07084	1.35168	0.958395	1.13494	1.28741	2.72904	3.08973	2.6428	0.982214	1.12691	2.82052	4.92965
down_up	Spats1	ENSMUSG00000023935	-0.796048	0.00394986	0.106201	0.632123	1.69333	2.09884	1.78615	1.41237	1.02685	0.781642	2.01087	2.30842	1.67854	1.85944	1.07362	1.99928	4.93233
down_up	Zbtb8a	ENSMUSG00000028807	-2.8513	8.99e-13	-1.43838	5.58e-09	2.98348	3.55519	3.33092	0.403535	0.432356	0.505768	1.10119	1.13645	1.35712	3.28986	0.44722	1.19825	4.93534
same_same	Shld1	ENSMUSG00000044991	-0.495336	0.019915	-0.205169	0.284513	2.05618	1.75618	1.97924	1.61414	1.24302	1.24143	1.34058	1.77571	1.82139	1.93053	1.3662	1.64589	4.94263
down_up	5830408C22Rik	ENSMUSG00000110148	-1.92104	5.54e-08	0.0625835	0.747723	2.05618	2.65568	1.73787	0.655744	0.486401	0.551747	1.91511	1.95328	2.82137	2.14991	0.564631	2.22992	4.94446
down_same	F830045P16Rik	ENSMUSG00000043727	-0.952059	0.000231905	-0.954742	0.000116951	2.13682	2.78418	2.36544	1.36193	0.972802	1.37937	1.62785	1.45608	0.749985	2.42881	1.23803	1.27797	4.94482
down_up	Plekhh2	ENSMUSG00000040852	-1.75636	3.65e-09	-1.10705	9.62e-07	3.0238	2.69851	2.75163	0.907953	0.756624	0.827621	1.10119	1.66917	1.10712	2.82465	0.830733	1.29249	4.94787
down_same	Adarb1	ENSMUSG00000020262	-0.706934	0.000543827	-0.771268	0.000122243	2.45936	2.18451	2.12407	1.31149	1.51325	1.33339	1.14907	1.20748	1.5714	2.25598	1.38604	1.30932	4.95133
down_same	Rtl10	ENSMUSG00000086965	-0.703245	0.00246025	-0.579636	0.00647965	2.17713	2.44151	1.8827	0.907953	1.72943	1.37937	1.43633	1.45608	1.46426	2.16711	1.33892	1.45222	4.95825
down_up	Slc46a1	ENSMUSG00000020829	-1.38824	1.25e-07	-0.17913	0.315184	2.17713	2.22735	2.17234	1.00884	0.810668	0.689684	1.91511	1.98879	1.89282	2.19227	0.836396	1.93224	4.96091
same_up	Chrm4	ENSMUSG00000040495	-0.400007	0.11479	0.172206	0.438201	2.25777	1.71334	1.15858	1.10972	1.18898	1.60926	1.91511	2.05982	1.89282	1.7099	1.30265	1.95592	4.96847
down_same	4930599N23Rik	ENSMUSG00000073144	-0.592501	0.00942124	-0.44617	0.032385	2.45936	1.75618	2.02752	1.16016	1.24302	1.70122	1.43633	1.49159	1.64282	2.08102	1.36814	1.52358	4.97274
down_up	Entpd1	ENSMUSG00000048120	-0.663548	0.00463935	0.492417	0.00737692	1.33047	1.79901	1.83442	1.10972	0.918757	1.05752	2.10662	2.34393	2.42852	1.65463	1.02866	2.29303	4.97633
down_up	Slc46a3	ENSMUSG00000029650	-2.69813	1.67e-10	0.17751	0.308246	2.37872	1.84184	2.36544	0.252209	0.162134	0.551747	2.29814	2.52151	2.57138	2.19533	0.32203	2.46367	4.98104
same_down	Ada	ENSMUSG00000017697	-0.22632	0.236762	-0.899815	3.71e-05	2.41904	1.92751	1.8827	2.01767	1.67538	1.65524	1.19695	1.02991	1.14283	2.07641	1.78277	1.12323	4.98241
up_same	Gm37498	ENSMUSG00000103907	1.86841	6.12e-08	1.37597	1.99e-05	0.483808	0.856671	0.724113	2.47165	3.18863	1.93112	1.67572	1.45608	2.17853	0.688197	2.53046	1.77011	4.98877
down_up	Dpf1	ENSMUSG00000030584	-0.807539	0.00239531	0.0673679	0.753267	2.3384	1.58484	1.73787	1.00884	0.756624	1.42535	2.68116	1.81122	1.64282	1.88704	1.0636	2.04507	4.99571
same_same	Gm3555	ENSMUSG00000089791	-0.392982	0.0788515	-0.606856	0.00741025	2.13682	1.97034	2.07579	1.76546	1.56729	1.37937	1.53209	1.31402	1.24997	2.06098	1.57071	1.36536	4.99706
up_same	Gstp3	ENSMUSG00000058216	2.8484	9.21e-09	3.28296	5.1e-11	0.201586	0.428336	0.193097	2.01767	1.62134	2.34493	2.77691	2.73459	2.67852	0.27434	1.99465	2.73001	4.99899
same_same	A230072C01Rik	ENSMUSG00000086877	-0.227697	0.288283	-0.359094	0.087548	2.01586	2.01318	1.6896	1.36193	1.83751	1.70122	1.14907	1.45608	1.78568	1.90621	1.63355	1.46361	5.00338
down_up	Mrnip	ENSMUSG00000020381	-2.7801	1.05e-12	-1.50051	2.48e-09	3.2657	3.55519	3.23437	0.453977	0.540445	0.459789	1.10119	1.20748	1.21426	3.35175	0.484737	1.17431	5.0108
same_down	Dyrk1b	ENSMUSG00000002409	0.164035	0.427803	-0.380182	0.0795106	1.45142	2.22735	1.54478	1.96723	2.05369	1.83916	1.14907	1.243	1.5714	1.74118	1.95336	1.32115	5.0157
down_up	Sptbn2	ENSMUSG00000067889	-0.51	0.0606681	0.428641	0.0548019	1.89491	1.02801	2.02752	0.706186	1.18898	1.5173	2.48965	2.05982	2.14281	1.65015	1.13749	2.23076	5.0184
same_same	Gm13563	ENSMUSG00000085767	-0.110108	0.63331	0.360798	0.076695	1.73364	1.62768	1.3034	0.958395	1.78347	1.60926	2.05875	2.23739	1.74996	1.55491	1.45038	2.01537	5.02065
down_up	Gm15535	ENSMUSG00000085527	-0.732169	0.00210831	0.0849714	0.658285	1.89491	1.92751	1.83442	1.2106	0.810668	1.33339	2.20238	1.59814	2.24995	1.88561	1.11822	2.01682	5.02066
[truncated: 10,565 more rows]

## Sheet: Table S4
Table S4. Top 33 genes of IL-gene set
[truncated: 34 more rows]

[truncated: 2 more sheets: Table S5, Table S6]
